# Supplementary material for: Amine organocatalysts for highly ortho-selective chlorination of anilines with sulfuryl chloride
Source: Royal Society of Chemistry journal article supplement (doi:10.1039/d2cc05320a), 2022-01-01

# Supporting Information

## Amine organocatalysts for highly *ortho*-selective chlorination of anilines with sulfuryl chloride

Xinzhe Wang, Zhihuang Chen, Qingqing Liu, Wenqing Lin, Xiaodong Xiong\*

School of Pharmacy, Nanchang University, Nanchang, Jiangxi, China

E-mail: xiongxd@ncu.edu.cn

### Table of contents

|                 |                                                     |
|-----------------|-----------------------------------------------------|
| <b>S2–S30</b>   | <b>Experimental procedures and physical data</b>    |
| <b>S31–S50</b>  | <b>NMR spectra and GC/MS of crude samples</b>       |
| <b>S51–S59</b>  | <b>Mechanistic study</b>                            |
| <b>S60</b>      | <b>References</b>                                   |
| <b>S61–S151</b> | <b><sup>1</sup>H and <sup>13</sup>C NMR Spectra</b> |

## **(A) General information**

Commercially available reagents were used directly without further purification. For others, we prepared them in suitable reaction conditions. NMR spectra were recorded on a Bruker ADVANCE III 400MHz spectrometer ( $^1\text{H}$  NMR: 400 MHz,  $^{13}\text{C}$  NMR: 100 MHz). Chemical shifts ( $\delta$ ) were reported in ppm relative to  $\text{CDCl}_3$  ( $\delta$  7.26) for the  $^1\text{H}$  NMR and to  $\text{CDCl}_3$  ( $\delta$  77.16) for the  $^{13}\text{C}$  NMR measurements. Mass spectra were recorded on Thermo Finnigan MAT 95 XL spectrometer and Bruker solariX 9.4 Tesla FTICR spectrometer. GC/MS analysis was conducted on a Shimadzu GCMSQP2010 instrument equipped with a Restec-5HT column (30 m  $\times$  0.25 mm, Hewlett-Packard). IR spectra were recorded on a PerkinElmer FT-IR spectrophotometer and reported in terms of wavenumber of absorption ( $\text{cm}^{-1}$ ). Flash column chromatography was performed on 300-400 mesh silica gel from Qingdao Haiyang Chemical Co., Ltd. Reactions were monitored by thin-layer chromatography (TLC) using 254 nm UV light to visualize the progress of the reactions.

## (B) Substrate preparation

### General Procedure for the preparation of *N*-Cbz aniline **2**

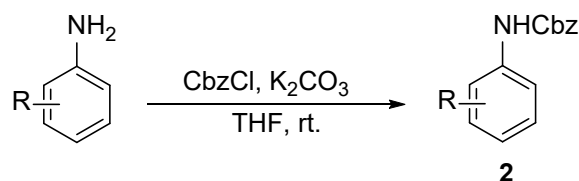

To a solution of aniline (5.0 mmol, 1.0 eq) and K<sub>2</sub>CO<sub>3</sub> (828 mg, 6.0 mmol, 1.2 eq) in dry THF (30 mL) was added dropwise CbzCl (937.7 mg, 5.5 mmol, 1.1 eq) over 10 min at 0°C and the reaction mixture was stirred overnight at 25 °C under N<sub>2</sub>. The reaction mixture was quenched with H<sub>2</sub>O (20 mL), then extracted with CH<sub>2</sub>Cl<sub>2</sub> (10 mL × 3). The combined organic layers were dried over sodium sulfate, filtered, and concentrated to dryness *in vacuo*. The residue was purified over silica gel chromatography eluted with *n*-hexane/ethyl acetate (5:1-1:1) to yield *N*-Cbz aniline **2**.

### General Procedure for the preparation of *N*-carbonyl aniline **2**

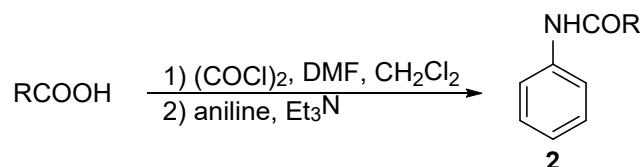

#### Step-1

To a solution of carboxylic acid (5.0 mmol, 1.0 eq) and catalytic amount of DMF in dry CH<sub>2</sub>Cl<sub>2</sub> (20 mL) was added dropwise oxalyl chloride (6.5 mmol, 1.3 eq) over 10 min at 0°C, and the resulting reaction mixture was stirred for 4 h at 25 °C under N<sub>2</sub>. The resulting mixture was concentrated under reduced pressure to afford acid chloride quantitatively which was used directly without further purification for the next step.

#### Step-2

To a solution of aniline (4.2 mmol, 1.0 eq) and Et<sub>3</sub>N (6.3 mmol, 1.5 eq) in dry CH<sub>2</sub>Cl<sub>2</sub> (20 mL) was added dropwise acid chloride (5.0 mmol, 1.2 eq) over 15 min at 0°C and the resulting reaction mixture was stirred for 12 h at 25 °C under N<sub>2</sub>. Then the reaction was quenched with H<sub>2</sub>O (20 mL), then extracted with CH<sub>2</sub>Cl<sub>2</sub> (10 mL × 3). The combined organic layers were washed with saturated aqueous NaHCO<sub>3</sub> (20 mL) followed by H<sub>2</sub>O (20 mL). After that, the organic layer was dried over sodium sulfate, filtered, and concentrated to dryness *in vacuo*. The residue was purified over silica gel chromatography eluted with *n*-hexane/ethyl acetate (5:1-1:1) to yield aniline **2**.

### General Procedure for the preparation of aniline **2**

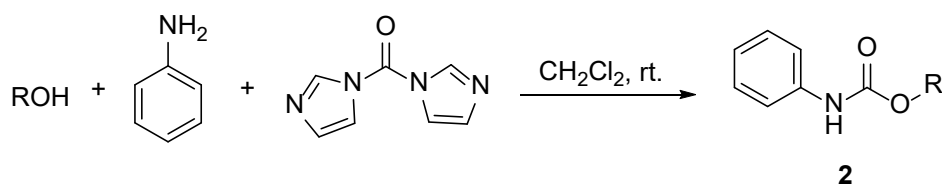

To a stirred solution of aniline (5.0 mmol, 1.0 eq) in CH<sub>3</sub>CN (15 mL) were added carbonyldiimidazole (CDI) (20.0 mmol, 4.0 eq) and DMAP (1.0 mmol, 0.2 eq). The reaction mixture was heated at reflux for 5 h. After this time, the appropriate ROH (75.0 mmol, 15 eq) was then added and reflux continued for a further 24 h under the same conditions. The reaction mixture was then cooled to room temperature, concentrated *in vacuo* and the resulting crude product purified by flash column chromatography eluted with *n*-hexane/ethyl acetate (5:1-1:1) to yield aniline **2**.

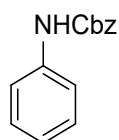

#### benzyl phenylcarbamate (**2a**)

White solid. <sup>1</sup>H NMR (400 MHz, CDCl<sub>3</sub>) δ 5.21 (s, 2H), 6.70 (s, 1H), 7.07 (t, *J* = 8.0 Hz, 1H), 7.28-7.33 (m, 2H), 7.34-7.43 (m, 7H); <sup>13</sup>C NMR (100 MHz, CDCl<sub>3</sub>) δ 153.6, 137.9, 136.1, 129.0, 128.5, 128.3, 128.2, 123.4, 118.8, 66.9.

The analytical data are in accordance with those reported in the literature.<sup>1</sup>

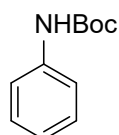

#### tert-butyl phenylcarbamate (**2b**)

White solid. <sup>1</sup>H NMR (400 MHz, CDCl<sub>3</sub>) δ 1.44 (s, 9H), 6.50 (s, 1H), 6.95 (t, *J* = 8.0 Hz, 1H), 7.20 (t, *J* = 8.0 Hz, 2H), 7.28 (d, *J* = 8.0 Hz, 2H); <sup>13</sup>C NMR (100 MHz, CDCl<sub>3</sub>) δ 152.9, 138.4, 129.1, 123.1, 118.6, 80.6, 28.5.

The analytical data are in accordance with those reported in the literature.<sup>2</sup>

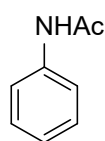

#### N-phenylacetamide (**2c**)

White solid. <sup>1</sup>H NMR (400 MHz, CDCl<sub>3</sub>) δ 2.15 (s, 3H), 7.09 (t, *J* = 8.0 Hz, 1H), 7.30 (t, *J* = 8.0 Hz, 2H), 7.51 (d, *J* = 8.0 Hz, 2H), 7.84 (s, 1H); <sup>13</sup>C NMR (100 MHz, CDCl<sub>3</sub>) δ 168.9, 138.1, 129.0, 124.4, 120.1, 24.6.

The analytical data are in accordance with those reported in the literature.<sup>2</sup>

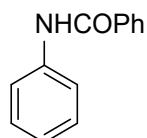

#### N-phenylbenzamide (**2d**)

White solid. <sup>1</sup>H NMR (400 MHz, CDCl<sub>3</sub>) δ 7.16 (t, *J* = 8.0 Hz, 1H), 7.39 (t, *J* = 8.0



Hz, 2H), 7.50 (t,  $J = 8.0$  Hz, 2H), 7.55-7.58 (m, 1H), 7.65 (d,  $J = 8.0$  Hz, 2H), 7.80 (s, 1H), 7.88 (d,  $J = 8.0$  Hz, 2H);  $^{13}\text{C}$  NMR (100 MHz,  $\text{CDCl}_3$ )  $\delta$  166.0, 138.1, 135.1, 132.0, 129.2, 128.9, 127.2, 124.7, 120.4.

The analytical data are in accordance with those reported in the literature.<sup>2</sup>

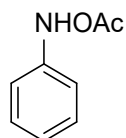

#### **O-acetyl-N-phenylhydroxylamine (2e)**

White solid.  $^1\text{H}$  NMR (400 MHz,  $\text{CDCl}_3$ )  $\delta$  2.15 (s, 3H), 7.09 (t,  $J = 8.0$  Hz, 1H), 7.30 (t,  $J = 8.0$  Hz, 2H), 7.51 (t,  $J = 8.0$  Hz, 2H), 7.82 (s, 1H);  $^{13}\text{C}$  NMR (100 MHz,  $\text{CDCl}_3$ )  $\delta$  168.9, 138.1, 129.0, 124.4, 120.1, 24.6.

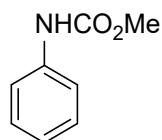

#### **methyl phenylcarbamate (2f)**

White solid.  $^1\text{H}$  NMR (400 MHz,  $\text{CDCl}_3$ )  $\delta$  3.78 (s, 3H), 6.59 (s, 1H), 7.07 (t,  $J = 8.0$  Hz, 1H), 7.31 (t,  $J = 8.0$  Hz, 2H), 7.38 (d,  $J = 8.0$  Hz, 2H);  $^{13}\text{C}$  NMR (100 MHz,  $\text{CDCl}_3$ )  $\delta$  154.2, 138.0, 129.2, 123.6, 118.8, 52.5.

The analytical data are in accordance with those reported in the literature.<sup>3</sup>

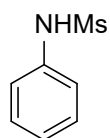

#### **N-phenylmethanesulfonamide (2g)**

White solid.  $^1\text{H}$  NMR (400 MHz,  $\text{CDCl}_3$ )  $\delta$  3.01 (s, 3H), 7.16-7.20 (m, 2H), 7.25 (d,  $J = 8.0$  Hz, 2H), 7.34 (t,  $J = 8.0$  Hz, 2H);  $^{13}\text{C}$  NMR (100 MHz,  $\text{CDCl}_3$ )  $\delta$  136.9, 129.8, 125.5, 120.9, 39.3.

The analytical data are in accordance with those reported in the literature.<sup>2</sup>

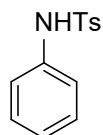

#### **4-methyl-N-phenylbenzenesulfonamide (2h)**

White solid.  $^1\text{H}$  NMR (400 MHz,  $\text{CDCl}_3$ )  $\delta$  3.36 (s, 3H), 7.07-7.11 (m, 3H), 7.20-7.26 (m, 4H), 7.30 (s, 3H), 7.70 (t,  $J = 8.0$  Hz, 2H);  $^{13}\text{C}$  NMR (100 MHz,  $\text{CDCl}_3$ )  $\delta$  144.0, 136.7, 136.1, 129.8, 129.4, 127.4, 125.3, 121.5, 21.7.

The analytical data are in accordance with those reported in the literature.<sup>2</sup>

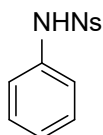

#### 4-nitro-N-phenylbenzenesulfonamide (2i)

Pale yellow solid. <sup>1</sup>H NMR (400 MHz, CDCl<sub>3</sub>) δ 6.62 (s, 1H), 7.08 (d, *J* = 8.0 Hz, 2H), 7.20 (t, *J* = 8.0 Hz, 1H), 7.29 (t, *J* = 8.0 Hz, 2H), 7.92 (d, *J* = 8.0 Hz, 2H), 8.28 (d, *J* = 8.0 Hz, 2H); <sup>13</sup>C NMR (100 MHz, CDCl<sub>3</sub>) δ 150.4, 144.7, 135.4, 129.8, 128.7, 126.7, 124.4, 122.6.

The analytical data are in accordance with those reported in the literature.<sup>2</sup>

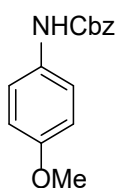

#### benzyl (4-methoxyphenyl)carbamate (2j)

White solid. <sup>1</sup>H NMR (400 MHz, CDCl<sub>3</sub>) δ 3.78 (s, 3H), 5.19 (s, 2H), 6.67 (s, 1H), 6.85 (d, *J* = 8.0 Hz, 2H), 7.29-7.42 (m, 7H); <sup>13</sup>C NMR (100 MHz, CDCl<sub>3</sub>) δ 156.1, 153.8, 136.3, 130.9, 128.7, 128.4, 120.8, 114.3, 67.0, 55.6.

The analytical data are in accordance with those reported in the literature.<sup>1</sup>

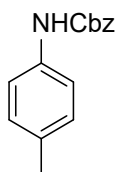

#### benzyl p-tolylcarbamate (2k)

White solid. <sup>1</sup>H NMR (400 MHz, CDCl<sub>3</sub>) δ 2.22 (s, 3H), 5.10 (s, 2H), 6.87 (s, 1H), 7.01 (d, *J* = 8.0 Hz, 2H), 7.20-7.31 (m, 7H); <sup>13</sup>C NMR (100 MHz, CDCl<sub>3</sub>) δ 153.6, 136.2, 135.3, 133.0, 129.5, 128.6, 128.3, 118.9, 66.9, 20.8.

The analytical data are in accordance with those reported in the literature.<sup>1</sup>

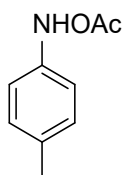

#### O-acetyl-N-(p-tolyl)hydroxylamine (2l)

White solid. <sup>1</sup>H NMR (400 MHz, CDCl<sub>3</sub>) δ 2.16 (s, 3H), 2.31 (s, 3H), 7.11 (d, *J* = 8.0 Hz, 2H), 7.37 (d, *J* = 8.0 Hz, 2H); <sup>13</sup>C NMR (100 MHz, CDCl<sub>3</sub>) δ 168.8, 135.5, 134.0, 129.5, 120.3, 24.5, 21.0. HRMS(ESI) calcd for C<sub>9</sub>H<sub>11</sub>NO<sub>2</sub>Na *m/z* [M+Na]<sup>+</sup>: 188.0682, found: 188.0682.

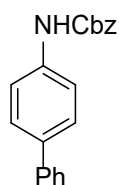

**benzyl [1,1'-biphenyl]-4-ylcarbamate (2m)**

White solid.  $^1\text{H}$  NMR (400 MHz,  $\text{CDCl}_3$ )  $\delta$  5.23 (s, 2H), 6.74 (s, 1H), 7.31-7.48 (m, 10H), 7.54-7.58 (m, 4H);  $^{13}\text{C}$  NMR (100 MHz,  $\text{CDCl}_3$ )  $\delta$  153.4, 140.6, 137.2, 136.6, 136.1, 128.9, 128.8, 128.6, 128.5, 127.9, 127.2, 126.9, 119.1, 67.3.

The analytical data are in accordance with those reported in the literature.<sup>4</sup>

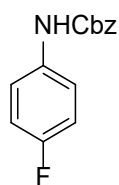

**benzyl (4-fluorophenyl)carbamate (2n)**

White solid.  $^1\text{H}$  NMR (400 MHz,  $\text{CDCl}_3$ )  $\delta$  5.20 (s, 2H), 6.72 (s, 1H), 7.00 (t,  $J = 8.0$  Hz, 2H), 7.32-7.41 (m, 7H);  $^{13}\text{C}$  NMR (100 MHz,  $\text{CDCl}_3$ )  $\delta$  160.4, 157.9, 153.6, 136.1, 133.8, 128.8, 128.6, 128.5, 120.6, 115.9, 115.7, 67.2.

The analytical data are in accordance with those reported in the literature.<sup>1</sup>

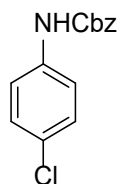

**benzyl (4-chlorophenyl)carbamate (2o)**

White solid.  $^1\text{H}$  NMR (400 MHz,  $\text{CDCl}_3$ )  $\delta$  5.20 (s, 2H), 6.70 (s, 1H), 7.25-7.27 (m, 2H), 7.33-7.42 (m, 7H);  $^{13}\text{C}$  NMR (100 MHz,  $\text{CDCl}_3$ )  $\delta$  153.3, 136.5, 135.9, 129.2, 128.8, 128.6, 128.5, 120.0, 67.3.

The analytical data are in accordance with those reported in the literature.<sup>1</sup>

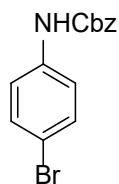

**benzyl (4-bromophenyl)carbamate (2p)**

White solid.  $^1\text{H}$  NMR (400 MHz,  $\text{CDCl}_3$ )  $\delta$  5.20 (s, 2H), 6.69 (s, 1H), 7.26-7.29 (m, 2H), 7.34-7.42 (m, 7H);  $^{13}\text{C}$  NMR (100 MHz,  $\text{CDCl}_3$ )  $\delta$  153.2, 137.0, 135.9, 132.1, 128.8, 128.6, 128.5, 120.3, 116.2, 67.4.

The analytical data are in accordance with those reported in the literature.<sup>1</sup>

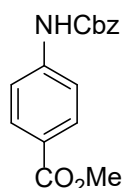

**methyl 4-(((benzyloxy)carbonyl)amino)benzoate (2q)**

White solid.  $^1\text{H}$  NMR (400 MHz,  $\text{CDCl}_3$ )  $\delta$  3.89 (s, 3H), 5.22 (s, 2H), 6.82 (s, 1H), 7.35-7.42 (m, 5H), 7.46 (d,  $J = 8.0$  Hz, 2H), 7.99 (d,  $J = 8.0$  Hz, 2H);  $^{13}\text{C}$  NMR (100 MHz,  $\text{CDCl}_3$ )  $\delta$  166.9, 153.1, 142.4, 135.8, 131.0, 128.7, 128.5, 128.4, 124.8, 117.7, 67.3, 52.1.

The analytical data are in accordance with those reported in the literature.<sup>5</sup>

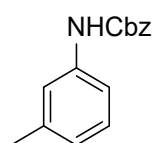

**benzyl m-tolylcarbamate (2r)**

White solid.  $^1\text{H}$  NMR (400 MHz,  $\text{CDCl}_3$ )  $\delta$  2.31 (s, 3H), 5.20 (s, 2H), 6.65 (s, 1H), 7.11 (d,  $J = 8.0$  Hz, 2H), 7.26-7.42 (m, 7H);  $^{13}\text{C}$  NMR (100 MHz,  $\text{CDCl}_3$ )  $\delta$  153.6, 136.2, 135.3, 133.2, 129.7, 128.7, 128.5, 128.4, 118.9, 67.1, 20.9.

The analytical data are in accordance with those reported in the literature.<sup>5</sup>

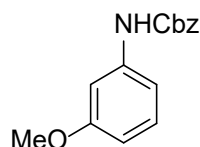

**benzyl (3-methoxyphenyl)carbamate (2s)**

White solid.  $^1\text{H}$  NMR (400 MHz,  $\text{CDCl}_3$ )  $\delta$  3.80 (s, 3H), 5.20 (s, 2H), 6.63 (dd,  $J = 4.0, 8.0$  Hz, 1H), 6.78 (s, 1H), 6.88 (d,  $J = 8.0$  Hz, 1H), 7.14 (s, 1H), 7.19 (t,  $J = 8.0$  Hz, 1H), 7.33-7.42 (m, 5H);  $^{13}\text{C}$  NMR (100 MHz,  $\text{CDCl}_3$ )  $\delta$  160.4, 153.4, 139.2, 136.1, 129.9, 128.8, 128.5, 128.4, 111.0, 109.4, 104.5, 67.2, 53.4.

The analytical data are in accordance with those reported in the literature.<sup>1</sup>

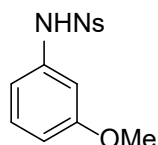

**N-(3-methoxyphenyl)-4-nitrobenzenesulfonamide (2t)**

White solid.  $^1\text{H}$  NMR (400 MHz,  $\text{CDCl}_3$ )  $\delta$  3.76 (s, 3H), 6.61 (d,  $J = 8.0$  Hz, 1H), 6.70-6.72 (m, 2H), 6.89 (s, 1H), 7.16 (t,  $J = 8.0$  Hz, 1H), 7.96 (d,  $J = 8.0$  Hz, 2H), 8.29 (d,  $J = 8.0$  Hz, 2H);  $^{13}\text{C}$  NMR (100 MHz,  $\text{CDCl}_3$ )  $\delta$  160.6, 150.4, 144.6, 136.7, 130.5, 128.7, 124.5, 113.9, 111.6, 108.0, 55.5.

The analytical data are in accordance with those reported in the literature.<sup>2</sup>

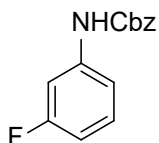

**benzyl (3-fluorophenyl)carbamate (2u)**

White solid.  $^1\text{H}$  NMR (400 MHz,  $\text{CDCl}_3$ )  $\delta$  5.21 (s, 2H), 6.71 (s, 1H), 6.76 (t,  $J = 8.0$  Hz, 1H), 7.01 (d,  $J = 8.0$  Hz, 1H), 7.21-7.25 (m, 1H), 7.33-7.43 (m, 6H);  $^{13}\text{C}$  NMR (100 MHz,  $\text{CDCl}_3$ )  $\delta$  164.4, 162.0, 153.3, 139.6, 139.4, 135.9, 130.3, 130.2, 128.7, 128.5, 128.4, 114.0, 110.3, 110.1, 106.3, 106.0, 67.3.

The analytical data are in accordance with those reported in the literature.<sup>6</sup>

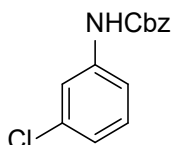

**benzyl (3-chlorophenyl)carbamate (2v)**

White solid.  $^1\text{H}$  NMR (400 MHz,  $\text{CDCl}_3$ )  $\delta$  5.20 (s, 2H), 6.77 (s, 1H), 7.03-7.05 (m, 1H), 7.19-7.22 (m, 2H), 7.33-7.40 (m, 5H), 7.52 (s, 1H);  $^{13}\text{C}$  NMR (100 MHz,  $\text{CDCl}_3$ )  $\delta$  153.2, 139.1, 135.9, 134.9, 130.2, 128.8, 128.6, 128.5, 123.7, 118.8, 116.7, 67.4.

The analytical data are in accordance with those reported in the literature.<sup>7</sup>

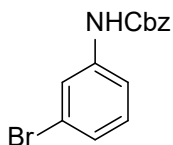

**benzyl (3-bromophenyl)carbamate (2w)**

White solid.  $^1\text{H}$  NMR (400 MHz,  $\text{CDCl}_3$ )  $\delta$  5.20 (s, 2H), 6.70 (s, 1H), 6.13-6.20 (m, 2H), 7.26-7.28 (m, 1H), 7.34-7.40 (m, 5H), 7.66 (s, 1H);  $^{13}\text{C}$  NMR (100 MHz,  $\text{CDCl}_3$ )  $\delta$  153.1, 139.2, 135.9, 130.5, 128.8, 128.6, 128.5, 126.6, 122.9, 121.6, 117.2, 67.4.

The analytical data are in accordance with those reported in the literature.<sup>7</sup>

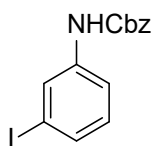

**benzyl (3-iodophenyl)carbamate (2x)**

White solid.  $^1\text{H}$  NMR (400 MHz,  $\text{CDCl}_3$ )  $\delta$  5.20 (s, 2H), 6.61 (s, 1H), 7.02 (t,  $J = 8.0$  Hz, 1H), 7.31-7.40 (m, 7H), 7.82 (s, 1H);  $^{13}\text{C}$  NMR (100 MHz,  $\text{CDCl}_3$ )  $\delta$  153.1, 139.1, 135.9, 132.7, 130.6, 128.8, 128.6, 128.5, 127.4, 117.9, 94.4, 67.4.

The analytical data are in accordance with those reported in the literature.<sup>8</sup>

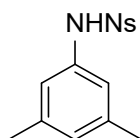

**N-(3,5-dimethylphenyl)-4-nitrobenzenesulfonamide (2y)**

White solid.  $^1\text{H}$  NMR (400 MHz,  $\text{CDCl}_3$ )  $\delta$  2.24 (s, 6H), 6.42 (s, 1H), 6.68 (s, 2H), 6.82 (s, 1H), 7.93 (d,  $J = 8.0$  Hz, 2H), 8.29 (d,  $J = 8.0$  Hz, 2H);  $^{13}\text{C}$  NMR (100 MHz,  $\text{CDCl}_3$ )  $\delta$  150.3, 144.8, 139.7, 135.3, 128.6, 128.2, 124.4, 119.8, 21.4.

The analytical data are in accordance with those reported in the literature.<sup>2</sup>

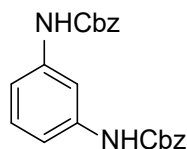**dibenzyl 1,3-phenylenedicarbamate (2z)**

White solid.  $^1\text{H}$  NMR (400 MHz,  $\text{CDCl}_3$ )  $\delta$  5.19 (s, 4H), 6.68 (s, 2H), 7.08 (d,  $J = 8.0$  Hz, 2H), 7.22 (t,  $J = 8.0$  Hz, 1H), 7.33-7.42 (m, 10H), 7.57 (s, 1H);  $^{13}\text{C}$  NMR (100 MHz,  $\text{CDCl}_3$ )  $\delta$  152.5, 138.6, 136.0, 129.6, 128.6, 128.3(2), 113.6, 109.0, 67.0.

The analytical data are in accordance with those reported in the literature.<sup>9</sup>

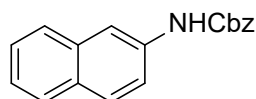**benzyl naphthalen-2-ylcarbamate (2aa)**

White solid.  $^1\text{H}$  NMR (400 MHz,  $\text{CDCl}_3$ )  $\delta$  5.25 (s, 2H), 6.84 (s, 1H), 7.34-7.48 (m, 8H), 7.78 (dd,  $J = 4.0, 8.0$  Hz, 3H), 8.01 (s, 1H);  $^{13}\text{C}$  NMR (100 MHz,  $\text{CDCl}_3$ )  $\delta$  153.5, 136.1, 135.3, 134.1, 130.4, 129.1, 128.8, 128.6, 128.5, 127.7, 127.6, 126.7, 124.9, 119.2, 115.0, 67.3.

The analytical data are in accordance with those reported in the literature.<sup>7</sup>

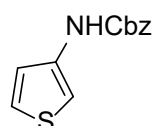**benzyl thiophen-3-ylcarbamate (2ab)**

White solid.  $^1\text{H}$  NMR (400 MHz,  $\text{CDCl}_3$ )  $\delta$  5.21 (s, 2H), 6.88 (s, 1H), 6.93 (d,  $J = 4.0$  Hz, 1H), 7.21-7.26 (m, 2H), 7.32-7.42 (m, 5H);  $^{13}\text{C}$  NMR (100 MHz,  $\text{CDCl}_3$ )  $\delta$  153.6, 136.0, 135.7, 128.6, 128.4, 128.2, 124.8, 120.8, 108.1, 67.1.

The analytical data are in accordance with those reported in the literature.<sup>10</sup>

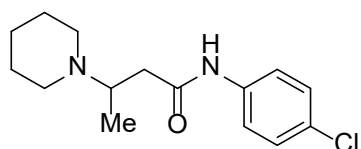**N-(4-chlorophenyl)-3-(piperidin-1-yl)butanamide (2a')**

White solid.  $R_f = 0.30$  (PE:EtOAc = 2:1);  $^1\text{H}$  NMR (400 MHz,  $\text{CDCl}_3$ )  $\delta$  1.02 (d,  $J = 6.4$  Hz, 3H), 1.54-1.60 (m, 2H), 1.63-1.76 (m, 4H), 2.21 (dd,  $J = 2.8, 8.6$  Hz, 1H), 2.44-2.49 (m, 2H), 2.55-2.63 (m, 1H), 2.72-2.78 (m, 2H), 3.04-3.09 (m, 1H), 7.26 (d,

$J = 8.0$  Hz, 2H), 7.52 (d,  $J = 8.0$  Hz, 2H), 11.79 (s, 1H);  $^{13}\text{C}$  NMR (100 MHz,  $\text{CDCl}_3$ )  $\delta$  170.6, 137.8, 129.1, 128.3, 120.8, 56.9, 48.6, 39.5, 26.8, 24.7, 13.3.

The analytical data are in accordance with those reported in the literature.<sup>15</sup>

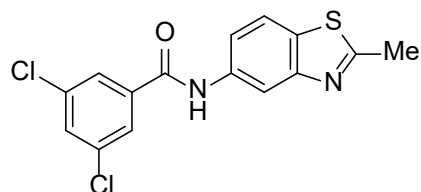

### 3,5-dichloro-N-(2-methylbenzo[d]thiazol-5-yl)benzamide (2b')

White solid.  $R_f = 0.30$  (PE:EtOAc = 2:1);  $^1\text{H}$  NMR (400 MHz,  $\text{CDCl}_3$ )  $\delta$  2.84 (s, 3H), 7.54 (s, 1H), 7.69 (d,  $J = 8.0$  Hz, 1H), 7.77 (s, 2H), 7.80 (d,  $J = 8.0$  Hz, 1H), 7.93 (s, 1H), 8.15 (s, 1H);  $^{13}\text{C}$  NMR (100 MHz,  $\text{CDCl}_3$ )  $\delta$  168.9, 163.4, 154.0, 137.8, 135.9, 135.8, 132.3, 131.9, 125.9, 121.9, 118.4, 114.2, 20.4.

The analytical data are in accordance with those reported in the literature.<sup>11</sup>

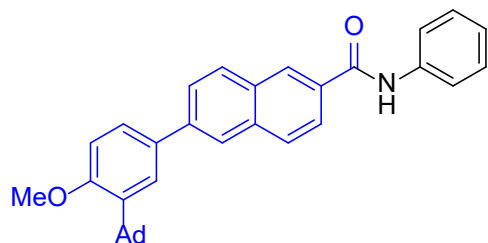

### 6-(3-(3s)-adamantan-1-yl)-4-methoxyphenyl-N-phenyl-2-naphthamide (2c')

White solid.  $R_f = 0.35$  (PE:EtOAc = 4:1);  $^1\text{H}$  NMR (400 MHz,  $\text{DMSO-}d_6$ )  $\delta$  1.76 (s, 6H), 2.07 (s, 3H), 2.14 (s, 6H), 3.86 (s, 3H), 7.12 (d,  $J = 8.0$  Hz, 2H), 7.38 (t,  $J = 8.0$  Hz, 2H), 7.59 (s, 1H), 7.66 (d,  $J = 8.0$  Hz, 1H), 7.85 (d,  $J = 8.0$  Hz, 2H), 7.91 (d,  $J = 8.0$  Hz, 1H), 8.02-8.05 (m, 1H), 8.13 (dd,  $J = 4.0, 8.0$  Hz, 2H), 8.24 (s, 1H), 8.59 (s, 1H), 10.44 (s, 1H);  $^{13}\text{C}$  NMR (100 MHz,  $\text{CDCl}_3$ )  $\delta$  165.9, 159.1, 141.2, 139.2, 138.2, 135.5, 132.6, 131.8, 131.5, 129.5, 129.3, 129.0, 127.5, 127.0, 126.1, 125.9, 124.9, 124.7, 124.0, 120.4, 112.3, 55.3, 40.8, 37.4, 37.3, 29.2. HRMS(ESI) calcd for  $\text{C}_{34}\text{H}_{34}\text{NO}_2$   $m/z$   $[\text{M}+\text{H}]^+$ : 488.2584, found: 488.2584.

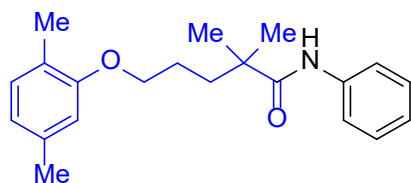

### 5-(2,5-dimethylphenoxy)-2,2-dimethyl-N-phenylpentanamide (2d')

White solid.  $R_f = 0.35$  (PE:EtOAc = 10:1);  $^1\text{H}$  NMR (400 MHz,  $\text{CDCl}_3$ )  $\delta$  1.35 (s, 6H), 1.82-1.83 (m, 4H), 2.18 (s, 3H), 2.30 (s, 3H), 3.95 (t,  $J = 4.0$  Hz, 2H), 6.61 (s, 1H), 6.67 (d,  $J = 8.0$  Hz, 1H), 7.01 (d,  $J = 4.0$  Hz, 1H), 7.11 (t,  $J = 8.0$  Hz, 1H), 7.32 (t,  $J = 8.0$  Hz, 2H), 7.38 (s, 1H), 7.52 (d,  $J = 8.0$  Hz, 2H);  $^{13}\text{C}$  NMR (100 MHz,  $\text{CDCl}_3$ )  $\delta$  175.8, 156.9, 137.9, 136.7, 130.4, 129.1, 124.4, 123.6, 120.9, 120.2, 112.2, 67.9, 42.9,

37.8, 25.8, 25.3, 21.5, 15.9. HRMS(ESI) calcd for  $C_{21}H_{27}NO_2Na$   $m/z$   $[M+Na]^+$ : 348.1934, found: 213.9865.

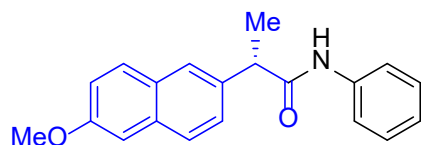

**(S)-2-(6-methoxynaphthalen-2-yl)-N-phenylpropanamide (2e')**

White solid.  $R_f = 0.55$  (PE:EtOAc = 2:1);  $^1H$  NMR (400 MHz,  $CDCl_3$ )  $\delta$  1.62 (d,  $J = 4.0$  Hz, 3H), 3.81 (q,  $J = 8.0$  Hz, 1H), 3.88 (s, 3H), 7.01 (t,  $J = 8.0$  Hz, 1H), 7.10 (s, 1H), 7.14 (dd,  $J = 4.0, 8.0$  Hz, 1H), 7.21 (t,  $J = 8.0$  Hz, 2H), 7.38 (d,  $J = 8.0$  Hz, 3H), 7.67-7.72 (m, 3H);  $^{13}C$  NMR (100 MHz,  $CDCl_3$ )  $\delta$  172.7, 157.9, 137.9, 136.1, 133.9, 129.4, 129.1, 128.9, 127.9, 126.4, 126.3, 124.3, 119.8, 119.4, 105.8, 55.4, 48.1, 18.7. HRMS(ESI) calcd for  $C_{20}H_{20}NO_2$   $m/z$   $[M+H]^+$ : 306.1489, found: 306.1490.

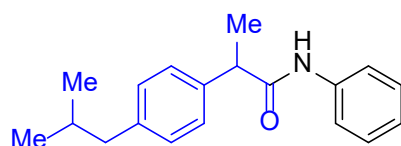

**2-(4-isobutylphenyl)-N-phenylpropanamide (2f')**

White solid.  $R_f = 0.41$  (PE:EtOAc = 3:1);  $^1H$  NMR (400 MHz,  $CDCl_3$ )  $\delta$  0.94 (d,  $J = 4.0$  Hz, 6H), 1.62 (d,  $J = 8.0$  Hz, 3H), 1.86-1.92 (m, 1H), 2.50 (d,  $J = 8.0$  Hz, 2H), 3.73 (q,  $J = 8.0$  Hz, 1H), 7.08 (d,  $J = 8.0$  Hz, 1H), 7.17 (d,  $J = 8.0$  Hz, 2H), 7.26-7.30 (m, 5H), 7.45 (d,  $J = 8.0$  Hz, 2H);  $^{13}C$  NMR (100 MHz,  $CDCl_3$ )  $\delta$  172.7, 141.2, 138.2, 138.0, 130.0, 129.0, 127.6, 124.3, 119.7, 47.9, 45.1, 30.3, 22.5, 18.6. HRMS(ESI) calcd for  $C_{19}H_{23}NONa$   $m/z$   $[M+Na]^+$ : 304.1672, found: 304.1672.

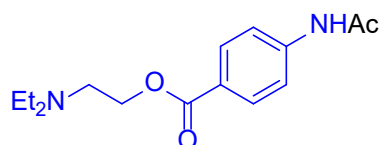

**2-(diethylamino)ethyl 4-acetamidobenzoate (2g')**

White solid.  $R_f = 0.37$  (DCM:MeOH = 3:1);  $^1H$  NMR (400 MHz,  $CDCl_3$ )  $\delta$  1.06 (t,  $J = 8.0$  Hz, 6H), 2.18 (s, 3H), 2.64 (q,  $J = 8.0$  Hz, 4H), 2.86 (t,  $J = 6.0$  Hz, 2H), 4.37 (t,  $J = 6.0$  Hz, 2H), 7.59 (d,  $J = 8.0$  Hz, 2H), 7.96 (d,  $J = 8.0$  Hz, 2H);  $^{13}C$  NMR (100 MHz,  $CDCl_3$ )  $\delta$  168.9, 166.3, 142.4, 130.9, 125.6, 118.9, 63.2, 51.0, 47.8, 24.8, 11.9. HRMS(ESI) calcd for  $C_{15}H_{23}N_2O_3$   $m/z$   $[M+H]^+$ : 279.1703, found: 279.1703.

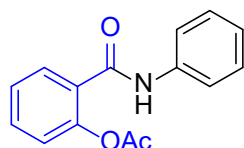

**2-(phenylcarbamoyl)phenyl acetate (2h')**

White solid.  $R_f = 0.45$  (PE:EtOAc = 5:1);  $^1H$  NMR (400 MHz,  $CDCl_3$ )  $\delta$  2.31 (s, 3H),



7.15 (t,  $J = 8.0$  Hz, 2H), 7.30-7.37 (m, 3H), 7.49 (t,  $J = 8.0$  Hz, 1H), 7.60 (d,  $J = 8.0$  Hz, 2H), 7.81 (d,  $J = 8.0$  Hz, 1H), 8.14 (s, 1H);  $^{13}\text{C}$  NMR (100 MHz,  $\text{CDCl}_3$ )  $\delta$  169.4, 163.8, 147.9, 137.9, 132.2, 129.9, 129.2, 128.9, 126.6, 124.8, 123.4, 120.0, 21.1. The analytical data are in accordance with those reported in the literature.<sup>12</sup>

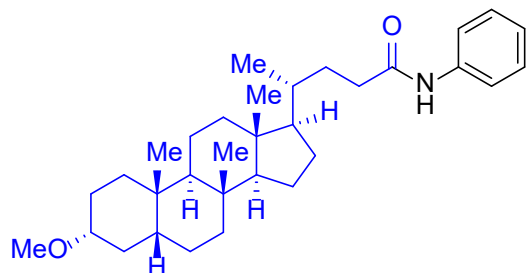

**(*R*)-4-((3*R*,5*R*,8*R*,9*R*,10*S*,13*R*,14*R*,17*R*)-3-methoxy-8,10,13-trimethylhexadecahydro-1*H*-cyclopenta[*a*]phenanthren-17-yl)-*N*-phenylpentanamide (2*i*')**

White solid.  $R_f = 0.35$  (PE:EtOAc = 2:1);  $^1\text{H}$  NMR (400 MHz,  $\text{CDCl}_3$ )  $\delta$  0.64 (s, 3H), 0.83-0.96 (m, 10H), 1.03-1.15 (m, 6H), 1.33-1.43 (m, 9H), 1.64-1.97 (m, 9H), 2.21-2.29 (m, 1H), 2.38-2.46 (m, 1H), 3.13-3.20 (m, 1H), 3.35 (s, 3H), 7.08 (d,  $J = 8.0$  Hz, 1H), 7.11 (s, 1H), 7.32 (t,  $J = 8.0$  Hz, 2H), 7.51 (d,  $J = 8.0$  Hz, 2H);  $^{13}\text{C}$  NMR (100 MHz,  $\text{CDCl}_3$ )  $\delta$  171.9, 138.2, 129.1, 124.3, 119.9, 80.6, 56.6, 56.2, 55.7, 42.9, 42.2, 40.4, 36.0, 35.6, 35.5, 35.1, 34.8, 32.9, 31.8, 29.8, 28.4, 27.5, 27.0, 26.5, 24.4, 23.6, 21.0, 18.6, 12.2. HRMS(ESI) calcd for  $\text{C}_{32}\text{H}_{49}\text{NO}_2\text{Na}$   $m/z$   $[\text{M}+\text{Na}]^+$ : 502.3656, found: 502.3656.

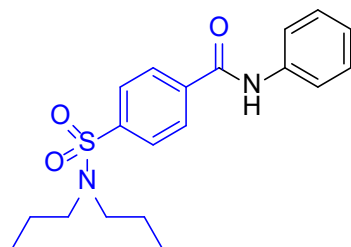

**4-(*N,N*-dipropylsulfamoyl)-*N*-phenylbenzamide (2*j*')**

White solid.  $R_f = 0.55$  (PE:EtOAc = 3:1);  $^1\text{H}$  NMR (400 MHz,  $\text{CDCl}_3$ )  $\delta$  0.83 (t,  $J = 8.0$  Hz, 6H), 1.45-1.54 (m, 4H), 3.02 (t,  $J = 8.0$  Hz, 4H), 7.12 (t,  $J = 8.0$  Hz, 1H), 7.30 (t,  $J = 8.0$  Hz, 2H), 7.62 (d,  $J = 8.0$  Hz, 2H), 7.70 (d,  $J = 8.0$  Hz, 2H), 7.88 (d,  $J = 8.0$  Hz, 2H), 8.98 (s, 1H);  $^{13}\text{C}$  NMR (100 MHz,  $\text{CDCl}_3$ )  $\delta$  165.1, 142.2, 138.8, 138.0, 128.9, 128.2, 127.0, 124.8, 120.5, 49.9, 21.9, 11.1. HRMS(ESI) calcd for  $\text{C}_{19}\text{H}_{25}\text{N}_2\text{O}_3\text{S}$   $m/z$   $[\text{M}+\text{H}]^+$ : 361.1580, found: 361.1580.

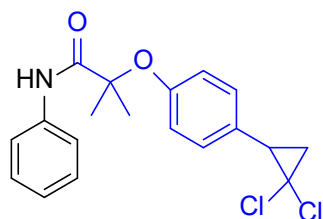

**2-(4-(2,2-dichlorocyclopropyl)phenoxy)-2-methyl-N-phenylpropanamide (2k')**

White solid.  $R_f = 0.40$  (PE:EtOAc = 3:1);  $^1\text{H NMR}$  (400 MHz,  $\text{CDCl}_3$ )  $\delta$  1.60 (s, 6H), 1.81 (t,  $J = 8.0$  Hz, 1H), 1.95-2.00 (m, 1H), 2.87 (t,  $J = 8.0$  Hz, 1H), 6.99 (t,  $J = 8.0$  Hz, 2H), 7.14 (t,  $J = 8.0$  Hz, 1H), 7.19 (d,  $J = 8.0$  Hz, 2H), 7.35 (t,  $J = 8.0$  Hz, 2H), 7.59 (dd,  $J = 4.0, 8.0$  Hz, 2H), 8.56 (s, 1H);  $^{13}\text{C NMR}$  (100 MHz,  $\text{CDCl}_3$ )  $\delta$  172.9, 153.4, 137.6, 130.2, 130.0, 129.2, 124.6, 121.7, 119.9, 82.2, 60.8, 34.9, 26.0, 25.1, 25.0. HRMS(ESI) calcd for  $\text{C}_{19}\text{H}_{19}\text{NO}_2\text{Cl}_2\text{Na}$   $m/z$   $[\text{M}+\text{Na}]^+$ : 386.0685, found: 386.0685.

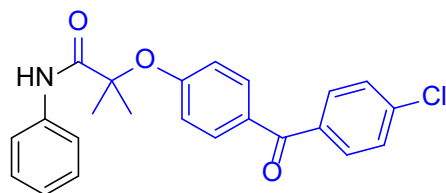**2-(4-(4-chlorobenzoyl)phenoxy)-2-methyl-N-phenylpropanamide (2l')**

White solid.  $R_f = 0.35$  (PE:EtOAc = 5:1);  $^1\text{H NMR}$  (400 MHz,  $\text{CDCl}_3$ )  $\delta$  1.68 (s, 6H), 7.05 (t,  $J = 8.0$  Hz, 2H), 7.14 (t,  $J = 8.0$  Hz, 1H), 7.34 (t,  $J = 8.0$  Hz, 2H), 7.45 (d,  $J = 8.0$  Hz, 2H), 7.54 (d,  $J = 8.0$  Hz, 2H), 7.67-7.78 (m, 4H), 8.30 (s, 1H);  $^{13}\text{C NMR}$  (100 MHz,  $\text{CDCl}_3$ )  $\delta$  194.4, 172.4, 158.3, 138.8, 137.3, 136.1, 132.1, 131.3, 129.2, 128.7(2), 124.9, 120.1(2), 82.4, 25.2. HRMS(ESI) calcd for  $\text{C}_{23}\text{H}_{21}\text{NClO}_3$   $m/z$   $[\text{M}+\text{H}]^+$ : 394.1205, found: 394.1204.

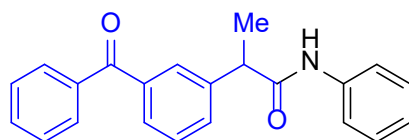**2-(3-benzoylphenyl)-N-phenylpropanamide (2m')**

White solid.  $R_f = 0.40$  (PE:EtOAc = 5:1);  $^1\text{H NMR}$  (400 MHz,  $\text{CDCl}_3$ )  $\delta$  1.55 (d,  $J = 8.0$  Hz, 3H), 3.79 (d,  $J = 8.0$  Hz, 1H), 7.05 (t,  $J = 8.0$  Hz, 1H), 7.22-7.25 (m, 2H), 7.41-7.49 (m, 5H), 7.58 (t,  $J = 8.0$  Hz, 1H), 7.65 (dd,  $J = 4.0, 8.0$  Hz, 2H), 7.76 (d,  $J = 8.0$  Hz, 2H), 7.83 (s, 1H), 8.04 (d,  $J = 8.0$  Hz, 1H);  $^{13}\text{C NMR}$  (100 MHz,  $\text{CDCl}_3$ )  $\delta$  197.0, 172.1, 141.8, 138.0(2), 137.3, 132.8, 131.6, 130.2, 129.4, 129.3, 128.9(2), 128.4, 124.4, 120.0, 47.7, 18.9. HRMS(ESI) calcd for  $\text{C}_{22}\text{H}_{19}\text{NO}_2\text{Na}$   $m/z$   $[\text{M}+\text{Na}]^+$ : 352.1308, found: 352.1308.

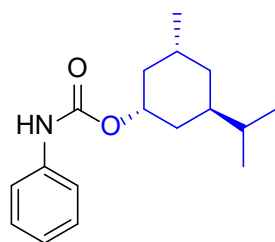**(3R)-3-isopropyl-5-methylcyclohexyl phenylcarbamate (2n')**

White solid.  $R_f = 0.55$  (PE:EtOAc = 2:1);  $^1\text{H NMR}$  (400 MHz,  $\text{CDCl}_3$ )  $\delta$  0.81 (d,  $J = 8.0$  Hz, 3H), 0.92 (dd,  $J = 4.0, 8.0$  Hz, 6H), 0.97-1.13 (m, 2H), 1.33-1.41 (m, 1H),

1.48-1.55 (m, 1H), 1.66-1.72 (m, 2H), 1.94-1.99 (m, 1H), 2.09-2.14 (m, 1H), 4.67 (dt,  $J = 4.0, 8.0$  Hz, 1H), 6.54 (s, 1H), 7.05 (t,  $J = 8.0$  Hz, 1H), 7.30 (t,  $J = 8.0$  Hz, 2H), 7.39 (d,  $J = 8.0$  Hz, 2H);  $^{13}\text{C}$  NMR (100 MHz,  $\text{CDCl}_3$ )  $\delta$  153.4, 138.3, 129.2, 123.3, 118.5, 75.2, 47.5, 41.5, 34.4, 31.5, 26.4, 23.6, 22.2, 20.9, 16.6. HRMS(ESI) calcd for  $\text{C}_{17}\text{H}_{25}\text{NO}_2\text{Na}$   $m/z$   $[\text{M}+\text{Na}]^+$ : 298.1778, found: 298.1778.

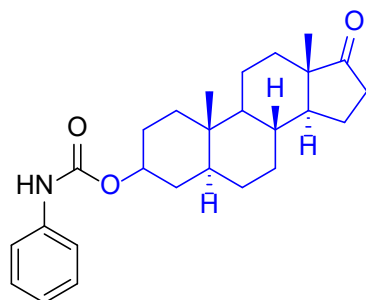

**(5*S*,8*R*,10*S*,13*S*,14*S*)-10,13-dimethyl-17-oxohexadecahydro-1*H*-cyclopenta[*a*]phenanthren-3-yl phenylcarbamate (2o')**

White solid.  $R_f = 0.35$  (PE:EtOAc = 2:1);  $^1\text{H}$  NMR (400 MHz,  $\text{CDCl}_3$ )  $\delta$  0.71 (dd,  $J = 4.0, 8.0$  Hz, 1H), 0.84 (s, 3H), 0.85 (s, 3H), 0.92-1.08 (m, 2H), 1.17-1.43 (m, 7H), 1.45-1.58 (m, 3H), 1.62-1.83 (m, 5H), 1.88-1.95 (m, 2H), 2.02-2.11 (m, 1H), 2.39-2.46 (m, 1H), 4.63-4.72 (m, 1H), 6.74 (s, 1H), 7.03 (t,  $J = 8.0$  Hz, 1H), 7.26-7.30 (m, 2H), 7.38 (d,  $J = 8.0$  Hz, 2H);  $^{13}\text{C}$  NMR (100 MHz,  $\text{CDCl}_3$ )  $\delta$  153.3, 138.2, 129.1, 123.3, 118.6, 74.5, 54.3, 51.4, 47.9, 44.7, 36.8, 35.9, 35.7, 35.1, 34.3, 31.6, 30.9, 28.3, 27.8, 21.8, 20.5, 13.9, 12.3. HRMS(ESI) calcd for  $\text{C}_{26}\text{H}_{36}\text{NO}_3$   $m/z$   $[\text{M}+\text{H}]^+$ : 410.2690, found: 410.2690.

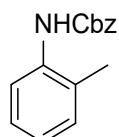

**benzyl *o*-tolylcarbamate (6)**

White solid.  $^1\text{H}$  NMR (400 MHz,  $\text{CDCl}_3$ )  $\delta$  2.15 (s, 3H), 5.14 (s, 2H), 6.52 (s, 1H), 6.97 (t,  $J = 8.0$  Hz, 1H), 7.08 (d,  $J = 8.0$  Hz, 1H), 7.14 (t,  $J = 8.0$  Hz, 1H), 7.26-7.36 (m, 5H), 7.75 (s, 1H);  $^{13}\text{C}$  NMR (100 MHz,  $\text{CDCl}_3$ )  $\delta$  153.8, 136.1, 135.8, 130.4, 128.7, 128.6, 128.3(2), 126.8, 124.2, 121.3, 67.0, 17.6.

The analytical data are in accordance with those reported in the literature.<sup>9</sup>

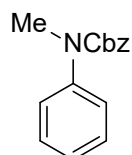

**benzyl methyl(phenyl)carbamate (8)**

White solid.  $^1\text{H}$  NMR (400 MHz,  $\text{CDCl}_3$ )  $\delta$  3.23 (s, 3H), 5.17 (s, 1H), 7.22-7.37 (m, 10H);  $^{13}\text{C}$  NMR (100 MHz,  $\text{CDCl}_3$ )  $\delta$  155.6, 143.3, 136.8, 129.0, 128.5, 128.0, 127.8, 126.3, 125.9, 67.4, 37.9.

The analytical data are in accordance with those reported in the literature.<sup>13</sup>

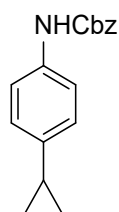

**benzyl (4-cyclopropylphenyl)carbamate (13)**

White solid. <sup>1</sup>H NMR (400 MHz, CDCl<sub>3</sub>) δ 0.62-0.66 (m, 2H), 0.90-0.95 (m, 2H), 1.83-1.89 (m, 1H), 5.19 (s, 1H), 6.61 (s, 1H), 7.02 (t, *J* = 8.0 Hz, 2H), 7.33-7.42 (m, 5H); <sup>13</sup>C NMR (100 MHz, CDCl<sub>3</sub>) δ 153.5, 139.3, 136.2, 135.3, 128.7, 128.4(2), 126.4, 118.9, 67.1, 15.0, 9.0. HRMS(ESI) calcd for C<sub>17</sub>H<sub>18</sub>NO<sub>2</sub> *m/z* [M+H]<sup>+</sup>: 268.1332, found: 268.1333.

**(C) General procedure for the *ortho*-chlorination of aniline catalyzed by 1f**

To a solution of secondary amine **1f** (0.02 mmol) and aniline **2** (0.2 mmol) in toluene (2 mL) in the dark was added SO<sub>2</sub>Cl<sub>2</sub> (0.4 mmol). The resulting mixture was stirred at room temperature and monitored by TLC. Upon completion, the reaction was quenched with saturated Na<sub>2</sub>SO<sub>3</sub> (3 mL). The organic layer was extracted with dichloromethane (3×10 mL), the combined organic layers were dried over anhydrous Na<sub>2</sub>SO<sub>4</sub> and evaporated under vacuum. The residue was purified by silica gel column chromatography (hexane/EA = 5:1 to 1:1) to yield the corresponding chlorinated product **3**.

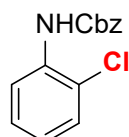

**benzyl (2-chlorophenyl)carbamate (3a)**

White solid. *R<sub>f</sub>* = 0.45 (PE:EtOAc = 10:1); <sup>1</sup>H NMR (400 MHz, CDCl<sub>3</sub>) δ 5.24 (s, 2H), 7.01 (dt, *J* = 4.0, 8.0 Hz, 1H), 7.24 (s, 1H), 7.28 (t, *J* = 8.0 Hz, 1H), 7.34-7.45 (m, 6H), 8.21 (d, *J* = 8.0 Hz, 1H); <sup>13</sup>C NMR (100 MHz, CDCl<sub>3</sub>) δ 153.1, 137.1, 134.7, 129.2, 128.8, 128.6, 128.5, 127.9, 123.9, 122.1, 119.9, 67.4.

The analytical data are in accordance with those reported in the literature.<sup>14</sup>

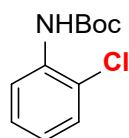

**tert-butyl (2-chlorophenyl)carbamate (3b)**

White solid. *R<sub>f</sub>* = 0.46 (PE:EtOAc = 20:1); <sup>1</sup>H NMR (400 MHz, CDCl<sub>3</sub>) δ 1.53 (s, 9H),

6.96 (t,  $J = 8.0$  Hz, 1H), 7.01 (s, 1H), 7.24 (t,  $J = 8.0$  Hz, 1H), 7.33 (d,  $J = 8.0$  Hz, 1H);  $^{13}\text{C}$  NMR (100 MHz,  $\text{CDCl}_3$ )  $\delta$  152.5, 135.3, 129.1, 127.8, 123.4, 121.9, 119.9, 81.2, 28.4.

The analytical data are in accordance with those reported in the literature.<sup>2</sup>

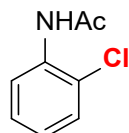

### N-(2-chlorophenyl)acetamide (3c)

White solid.  $R_f = 0.42$  (PE:EtOAc = 2:1);  $^1\text{H}$  NMR (400 MHz,  $\text{CDCl}_3$ )  $\delta$  2.24 (s, 3H), 7.03 (t,  $J = 8.0$  Hz, 1H), 7.27 (t,  $J = 8.0$  Hz, 1H), 7.36 (d,  $J = 8.0$  Hz, 1H), 7.63 (s, 1H), 8.35 (d,  $J = 8.0$  Hz, 1H);  $^{13}\text{C}$  NMR (100 MHz,  $\text{CDCl}_3$ )  $\delta$  168.4, 134.7, 129.1, 127.9, 124.7, 122.6, 121.7, 25.0.

The analytical data are in accordance with those reported in the literature.<sup>2</sup>

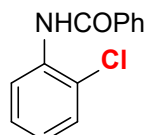

### N-(2-chlorophenyl)benzamide (3d)

White solid.  $R_f = 0.50$  (PE:EtOAc = 5:1);  $^1\text{H}$  NMR (400 MHz,  $\text{CDCl}_3$ )  $\delta$  7.09 (t,  $J = 8.0$  Hz, 1H), 7.34 (t,  $J = 8.0$  Hz, 1H), 7.42 (d,  $J = 8.0$  Hz, 1H), 7.51-7.55 (m, 2H), 7.59 (t,  $J = 8.0$  Hz, 1H), 7.92-7.95 (m, 2H), 8.46 (s, 1H), 8.58 (dd,  $J = 4.0, 8.0$  Hz, 1H);  $^{13}\text{C}$  NMR (100 MHz,  $\text{CDCl}_3$ )  $\delta$  165.4, 134.9, 134.7, 132.4, 129.2, 129.1, 128.0, 127.2, 124.9, 123.1, 121.6, 81.2, 28.4.

The analytical data are in accordance with those reported in the literature.<sup>2</sup>

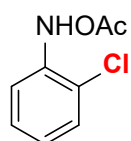

### O-acetyl-N-(2-chlorophenyl)hydroxylamine (3e)

White solid.  $R_f = 0.45$  (PE:EtOAc = 2:1);  $^1\text{H}$  NMR (400 MHz,  $\text{CDCl}_3$ )  $\delta$  2.23 (s, 3H), 7.03 (t,  $J = 8.0$  Hz, 1H), 7.26 (t,  $J = 8.0$  Hz, 1H), 7.35 (d,  $J = 8.0$  Hz, 1H), 7.64 (s, 1H), 8.35 (d,  $J = 8.0$  Hz, 1H);  $^{13}\text{C}$  NMR (100 MHz,  $\text{CDCl}_3$ )  $\delta$  168.4, 134.7, 129.1, 127.8, 124.7, 122.7, 121.8, 24.9. HRMS (ESI) calcd for  $\text{C}_8\text{H}_8\text{NO}_2\text{ClNa}$   $m/z$   $[\text{M}+\text{Na}]^+$ : 208.0136, found: 208.0136.

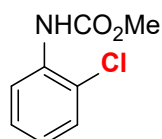

### methyl (2-chlorophenyl)carbamate (3f)

White solid.  $R_f = 0.55$  (PE:EtOAc = 10:1);  $^1\text{H NMR}$  (400 MHz,  $\text{CDCl}_3$ )  $\delta$  3.81 (s, 3H), 7.00 (dt,  $J = 4.0, 8.0$  Hz, 1H), 7.15 (s, 1H), 7.27 (t,  $J = 8.0$  Hz, 1H), 7.35 (dd,  $J = 4.0, 8.0$  Hz, 1H), 8.16 (d,  $J = 8.0$  Hz, 1H);  $^{13}\text{C NMR}$  (100 MHz,  $\text{CDCl}_3$ )  $\delta$  153.8, 134.8, 129.2, 127.9, 123.9, 122.2, 119.9, 52.7. HRMS (EI) calcd for  $\text{C}_{15}\text{H}_{14}\text{NO}_2\text{Cl}$   $m/z$   $[\text{M}]^+$ : 275.0708, found: 241.0095.

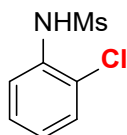

### N-(2-chlorophenyl)methanesulfonamide (3g)

White solid.  $R_f = 0.45$  (PE:EtOAc = 5:1);  $^1\text{H NMR}$  (400 MHz,  $\text{CDCl}_3$ )  $\delta$  3.02 (s, 3H), 6.80 (s, 1H), 7.15 (t,  $J = 8.0$  Hz, 1H), 7.32 (t,  $J = 8.0$  Hz, 1H), 7.43 (d,  $J = 8.0$  Hz, 1H), 7.66 (d,  $J = 8.0$  Hz, 1H);  $^{13}\text{C NMR}$  (100 MHz,  $\text{CDCl}_3$ )  $\delta$  133.7, 129.9, 128.5, 126.4, 125.1, 122.5, 40.0.

The analytical data are in accordance with those reported in the literature.<sup>2</sup>

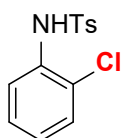

### N-(2-chlorophenyl)-4-methylbenzenesulfonamide (3h)

White solid.  $R_f = 0.35$  (PE:EtOAc = 10:1);  $^1\text{H NMR}$  (400 MHz,  $\text{CDCl}_3$ )  $\delta$  2.38 (s, 3H), 6.99 (s, 1H), 7.04 (t,  $J = 8.0$  Hz, 1H), 7.21-7.27 (t, 4H), 7.65-7.67 (m, 3H);  $^{13}\text{C NMR}$  (100 MHz,  $\text{CDCl}_3$ )  $\delta$  144.4, 135.9, 133.6, 129.8, 129.5, 128.0, 127.4, 125.9, 125.1, 122.4, 21.7.

The analytical data are in accordance with those reported in the literature.<sup>2</sup>

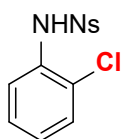

### N-(2-chlorophenyl)-4-nitrobenzenesulfonamide (3i)

White solid.  $R_f = 0.45$  (PE:EtOAc = 3:1);  $^1\text{H NMR}$  (400 MHz,  $\text{CDCl}_3$ )  $\delta$  7.07 (s, 1H), 7.13 (t,  $J = 6.0$  Hz, 1H), 7.26-7.32 (m, 2H), 7.69 (t,  $J = 8.0$  Hz, 1H), 7.92 (d,  $J = 8.0$  Hz, 2H), 8.27 (t,  $J = 8.0$  Hz, 2H);  $^{13}\text{C NMR}$  (100 MHz,  $\text{CDCl}_3$ )  $\delta$  150.5, 144.6, 132.4, 129.8, 128.7, 128.4, 127.4, 126.4, 124.4, 124.1.

The analytical data are in accordance with those reported in the literature.<sup>2</sup>

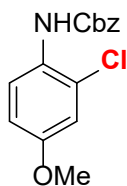

**benzyl (2-chloro-4-methoxyphenyl)carbamate (3j)**

Yellow solid.  $R_f = 0.50$  (PE:EtOAc = 8:1);  $^1\text{H NMR}$  (400 MHz,  $\text{CDCl}_3$ )  $\delta$  3.78 (s, 3H), 5.21 (s, 2H), 6.83 (dd,  $J = 4.0, 8.0$  Hz, 1H), 6.92 (d,  $J = 4.0$  Hz, 1H), 6.96 (s, 1H), 7.35-7.44 (m, 5H), 8.01 (s, 1H);  $^{13}\text{C NMR}$  (100 MHz,  $\text{CDCl}_3$ )  $\delta$  155.9, 153.5, 136.0, 128.8, 128.7, 128.5, 128.0, 123.6, 121.7, 114.6, 113.5, 67.4, 55.8. HRMS (ESI) calcd for  $\text{C}_{15}\text{H}_{15}\text{ClNO}_3$   $m/z$   $[\text{M}+\text{H}]^+$ : 292.0741, found: 292.0742.

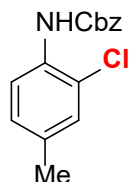**benzyl (2-chloro-4-methylphenyl)carbamate (3k)**

White solid.  $R_f = 0.45$  (PE:EtOAc = 8:1);  $^1\text{H NMR}$  (400 MHz,  $\text{CDCl}_3$ )  $\delta$  2.99 (s, 3H), 5.23 (s, 2H), 7.08 (dd,  $J = 8.0$  Hz, 1H), 7.13 (s, 1H), 7.17 (s, 1H), 7.37-7.42 (m, 5H), 8.05 (d,  $J = 8.0$  Hz, 1H);  $^{13}\text{C NMR}$  (100 MHz,  $\text{CDCl}_3$ )  $\delta$  153.2, 136.0, 133.9, 132.1, 129.5, 128.8, 128.6, 128.5, 128.4, 122.1, 120.0, 67.3, 20.6. HRMS (ESI) calcd for  $\text{C}_{15}\text{H}_{14}\text{NO}_2\text{ClNa}$   $m/z$   $[\text{M}+\text{Na}]^+$ : 298.0605, found: 298.0605.

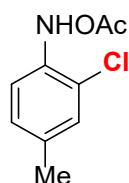**O-acetyl-N-(2-chloro-4-methylphenyl)hydroxylamine (3l)**

White solid.  $R_f = 0.45$  (PE:EtOAc = 3:1);  $^1\text{H NMR}$  (400 MHz,  $\text{CDCl}_3$ )  $\delta$  2.22 (s, 3H), 2.29 (s, 3H), 7.06 (d,  $J = 8.4$  Hz, 2H), 7.17 (s, 1H), 7.53 (s, 1H), 8.19 (d,  $J = 8.4$  Hz, 1H);  $^{13}\text{C NMR}$  (100 MHz,  $\text{CDCl}_3$ )  $\delta$  168.3, 134.9, 132.1, 129.4, 128.5, 122.6, 121.7, 24.9, 20.8. HRMS (ESI) calcd for  $\text{C}_9\text{H}_{11}\text{ClNO}_2$   $m/z$   $[\text{M}+\text{H}]^+$ : 200.0478, found: 200.0473.

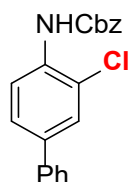**benzyl (3-chloro-[1,1'-biphenyl]-4-yl)carbamate (3m)**

White solid.  $R_f = 0.49$  (PE:EtOAc = 10:1);  $^1\text{H NMR}$  (400 MHz,  $\text{CDCl}_3$ )  $\delta$  5.21 (s, 2H), 7.21 (d,  $J = 8.0$  Hz, 1H), 7.29-7.55 (m, 12H), 8.23 (d,  $J = 8.0$  Hz, 1H);  $^{13}\text{C NMR}$  (100 MHz,  $\text{CDCl}_3$ )  $\delta$  153.1, 139.3, 137.1, 135.8, 133.8, 129.0, 128.8, 128.7, 128.6, 127.7, 127.6, 126.8, 126.5m 122.5, 67.5. HRMS (ESI) calcd for  $\text{C}_{20}\text{H}_{16}\text{NO}_2\text{ClNa}$   $m/z$   $[\text{M}+\text{Na}]^+$ : 360.0762, found: 360.0762.

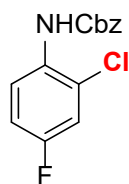

**benzyl (2-chloro-4-fluorophenyl)carbamate (3n)**

White solid.  $R_f = 0.41$  (PE:EtOAc = 30:1);  $^1\text{H NMR}$  (400 MHz,  $\text{CDCl}_3$ )  $\delta$  5.22 (s, 2H), 7.01 (dt,  $J = 4.0, 8.0$  Hz, 1H), 7.07 (s, 1H), 7.12 (dd,  $J = 4.0, 8.0$  Hz, 1H), 7.34-7.44 (m, 5H), 8.14 (t,  $J = 8.0$  Hz, 1H);  $^{13}\text{C NMR}$  (100 MHz,  $\text{CDCl}_3$ )  $\delta$  159.3, 156.9, 153.3, 135.8, 131.2(2), 128.8, 128.7, 128.6, 122.9, 121.3, 116.6, 116.3, 114.9, 114.7, 67.6. HRMS (ESI) calcd for  $\text{C}_{14}\text{H}_{11}\text{ClFNO}_2\text{Na}$   $m/z$   $[\text{M}+\text{Na}]^+$ : 302.0355, found: 302.0355.

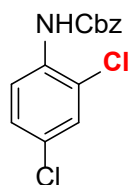

**benzyl (2,4-dichlorophenyl)carbamate (3o)**

White solid.  $R_f = 0.40$  (PE:EtOAc = 30:1);  $^1\text{H NMR}$  (400 MHz,  $\text{CDCl}_3$ )  $\delta$  5.22 (s, 2H), 7.16 (s, 1H), 7.25 (dd,  $J = 4.0, 8.0$  Hz, 1H), 7.35-7.44 (m, 6H), 8.16 (d,  $J = 8.0$  Hz, 1H);  $^{13}\text{C NMR}$  (100 MHz,  $\text{CDCl}_3$ )  $\delta$  152.9, 135.7, 133.6, 128.9, 128.8, 128.7, 128.6, 128.4, 128.1, 122.7, 120.8, 67.7.

The analytical data are in accordance with those reported in the literature.<sup>15</sup>

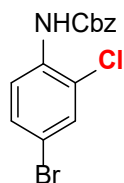

**benzyl (4-bromo-2-chlorophenyl)carbamate (3p)**

White solid.  $R_f = 0.42$  (PE:EtOAc = 30:1);  $^1\text{H NMR}$  (400 MHz,  $\text{CDCl}_3$ )  $\delta$  5.22 (s, 2H), 7.16 (s, 1H), 7.36-7.43 (m, 6H), 7.49 (d,  $J = 4.0$  Hz, 1H), 8.11 (d,  $J = 8.0$  Hz, 1H);  $^{13}\text{C NMR}$  (100 MHz,  $\text{CDCl}_3$ )  $\delta$  152.9, 135.7, 134.1, 131.6, 130.9, 128.9, 128.8, 128.6, 122.8, 121.1, 115.4, 67.7. HRMS (ESI) calcd for  $\text{C}_{14}\text{H}_{11}\text{BrClNO}_2\text{Na}$   $m/z$   $[\text{M}+\text{Na}]^+$ : 361.9554, found: 361.9556.

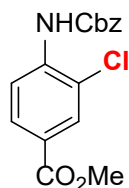

**methyl 4-(((benzyloxy)carbonyl)amino)-3-chlorobenzoate (3q)**

White solid.  $R_f = 0.40$  (PE:EtOAc = 8:1);  $^1\text{H NMR}$  (400 MHz,  $\text{CDCl}_3$ )  $\delta$  3.89 (s, 3H), 5.24 (s, 2H), 7.36-7.42 (m, 6H), 7.94 (d,  $J = 8.4$  Hz, 1H), 8.03 (s, 1H), 8.33 (d,  $J = 8.4$



Hz, 1H);  $^{13}\text{C}$  NMR (100 MHz,  $\text{CDCl}_3$ )  $\delta$  165.8, 152.8, 138.9, 135.6, 130.7, 129.6, 128.9, 128.8, 128.7, 125.5, 121.6, 118.8, 67.9, 52.4. HRMS (ESI) calcd for  $\text{C}_{16}\text{H}_{14}\text{ClNO}_4\text{Na}$   $m/z$   $[\text{M}+\text{Na}]^+$ : 342.0504, found: 342.0509.

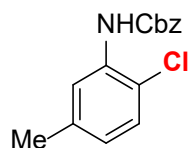

**benzyl (2-chloro-5-methylphenyl)carbamate (3r)**

White solid.  $R_f$  = 0.46 (PE:EtOAc = 8:1);  $^1\text{H}$  NMR (400 MHz,  $\text{CDCl}_3$ )  $\delta$  2.29 (s, 3H), 5.21 (s, 2H), 7.06 (d,  $J$  = 8.8 Hz, 1H), 7.11 (s, 1H), 7.16 (s, 1H), 7.35-7.43 (m, 5H), 8.03 (d,  $J$  = 8.0 Hz, 1H);  $^{13}\text{C}$  NMR (100 MHz,  $\text{CDCl}_3$ )  $\delta$  153.2, 135.9, 133.9, 132.1, 129.5, 128.8, 128.6(2), 128.5, 122.1, 120.1, 67.4, 20.7. HRMS (ESI) calcd for  $\text{C}_{15}\text{H}_{14}\text{ClNO}_2\text{Na}$   $m/z$   $[\text{M}+\text{Na}]^+$ : 298.0605, found: 298.0603.

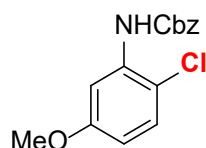

**benzyl (2-chloro-5-methoxyphenyl)carbamate (3s)**

White solid.  $R_f$  = 0.45 (PE:EtOAc = 8:1);  $^1\text{H}$  NMR (400 MHz,  $\text{CDCl}_3$ )  $\delta$  3.80 (s, 3H), 5.23 (s, 2H), 6.57 (dd,  $J$  = 4.0, 8.0 Hz, 1H), 7.20-7.22 (m, 2H), 7.36-7.45 (m, 5H), 7.87 (s, 1H);  $^{13}\text{C}$  NMR (100 MHz,  $\text{CDCl}_3$ )  $\delta$  159.3, 153.0, 135.8, 135.4, 129.4, 128.8, 128.7, 128.6, 113.3, 110.4, 104.9, 67.5, 55.7. HRMS (ESI) calcd for  $\text{C}_{15}\text{H}_{14}\text{ClNO}_3\text{Na}$   $m/z$   $[\text{M}+\text{Na}]^+$ : 314.0554, found: 314.0554.

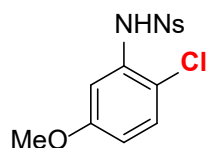

**N-(2-chloro-5-methoxyphenyl)-4-nitrobenzenesulfonamide (3t)**

White solid.  $^1\text{H}$  NMR (400 MHz,  $\text{CDCl}_3$ )  $\delta$  3.75 (s, 3H), 6.60 (dd,  $J$  = 4.0, 8.0 Hz, 2H), 6.96 (s, 1H), 7.08 (d,  $J$  = 12.0 Hz, 1H), 7.18 (d,  $J$  = 4.0 Hz, 1H), 7.87 (d,  $J$  = 8.0 Hz, 2H), 8.21 (d,  $J$  = 8.0 Hz, 2H);  $^{13}\text{C}$  NMR (100 MHz,  $\text{CDCl}_3$ )  $\delta$  159.3, 150.5, 144.5, 133.0, 130.1, 128.7, 124.4, 117.2, 113.2, 109.3, 55.9.

The analytical data are in accordance with those reported in the literature.<sup>2</sup>

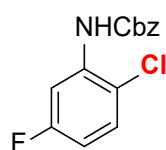

**benzyl (2-chloro-5-fluorophenyl)carbamate (3u)**

White solid.  $R_f$  = 0.40 (PE:EtOAc = 30:1);  $^1\text{H}$  NMR (400 MHz,  $\text{CDCl}_3$ )  $\delta$  5.22 (s, 2H), 6.71 (dt,  $J$  = 4.0, 8.0 Hz, 1H), 7.24 (s, 1H), 7.28 (dd,  $J$  = 4.0, 8.0 Hz, 1H), 7.35-7.44

(m, 5H), 8.04 (dd,  $J = 4.0, 12.0$  Hz, 1H);  $^{13}\text{C}$  NMR (100 MHz,  $\text{CDCl}_3$ )  $\delta$  163.1, 160.6, 152.8, 136.0, 135.9, 135.6, 129.9, 129.8, 128.9, 1228.8, 128.7, 128.6, 116.7, 116.6, 110.8, 110.5, 107.5, 107.2, 67.7. HRMS (ESI) calcd for  $\text{C}_{14}\text{H}_{11}\text{ClFNO}_2\text{Na}$   $m/z$   $[\text{M}+\text{Na}]^+$ : 302.0355, found: 302.0355.

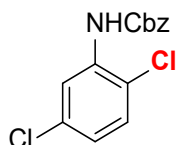

**benzyl (2,5-dichlorophenyl)carbamate (3v)**

White solid.  $R_f = 0.40$  (PE:EtOAc = 30:1);  $^1\text{H}$  NMR (400 MHz,  $\text{CDCl}_3$ )  $\delta$  5.23 (s, 2H), 6.98 (dd,  $J = 4.0, 8.0$  Hz, 1H), 7.21 (s, 1H), 7.26 (d,  $J = 8.0$  Hz, 1H), 7.37-7.45 (m, 5H), 8.30 (s, 1H);  $^{13}\text{C}$  NMR (100 MHz,  $\text{CDCl}_3$ )  $\delta$  152.8, 135.6(2), 133.8, 129.8, 128.8(2), 128.7, 123.8, 120.0, 119.8, 67.7. HRMS (ESI) calcd for  $\text{C}_{14}\text{H}_{12}\text{Cl}_2\text{NO}_2$   $m/z$   $[\text{M}+\text{H}]^+$ : 296.0240, found: 296.0240.

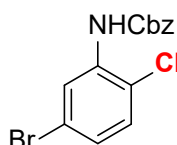

**benzyl (5-bromo-2-chlorophenyl)carbamate (3w)**

White solid.  $R_f = 0.40$  (PE:EtOAc = 30:1);  $^1\text{H}$  NMR (400 MHz,  $\text{CDCl}_3$ )  $\delta$  5.23 (s, 2H), 7.12 (d,  $J = 8.0$  Hz, 1H), 7.19-7.21 (m, 2H), 7.36-7.45 (m, 5H), 8.44 (s, 1H);  $^{13}\text{C}$  NMR (100 MHz,  $\text{CDCl}_3$ )  $\delta$  152.8, 135.8, 135.6, 130.2, 128.9, 128.8, 128.6, 126.7, 122.6, 121.5, 120.8, 67.7. HRMS (ESI) calcd for  $\text{C}_{14}\text{H}_{11}\text{ClBrNO}_2\text{Na}$   $m/z$   $[\text{M}+\text{Na}]^+$ : 361.9554, found: 361.9556.

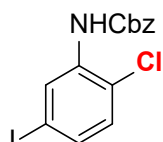

**benzyl (2-chloro-5-iodophenyl)carbamate (3x)**

White solid.  $R_f = 0.40$  (PE:EtOAc = 30:1);  $^1\text{H}$  NMR (400 MHz,  $\text{CDCl}_3$ )  $\delta$  5.22 (s, 2H), 7.05 (d,  $J = 8.0$  Hz, 1H), 7.16 (s, 1H), 7.26 (d,  $J = 8.0$  Hz, 1H), 7.31 (d,  $J = 8.0$  Hz, 1H), 7.37-7.44 (m, 5H), 8.58 (d,  $J = 4.0$  Hz, 1H);  $^{13}\text{C}$  NMR (100 MHz,  $\text{CDCl}_3$ )  $\delta$  152.8, 135.8, 135.6, 132.8, 130.5, 128.8, 128.7, 128.6, 128.4, 121.9, 92.4, 67.7. HRMS (ESI) calcd for  $\text{C}_{14}\text{H}_{11}\text{ClINO}_2\text{Na}$   $m/z$   $[\text{M}+\text{Na}]^+$ : 409.9415, found: 409.9415.

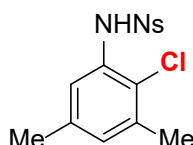

**N-(2-chloro-3,5-dimethylphenyl)-4-nitrobenzenesulfonamide (3y)**

White solid.  $R_f = 0.40$  (PE:EtOAc = 5:1);  $^1\text{H}$  NMR (400 MHz,  $\text{CDCl}_3$ )  $\delta$  2.22 (s, 3H),

2.30 (s, 3H), 6.87 (s, 1H), 7.03 (s, 1H), 7.35 (s, 1H), 7.92 (d,  $J = 8.0$  Hz, 2H), 8.27 (d,  $J = 12.0$  Hz, 2H);  $^{13}\text{C}$  NMR (100 MHz,  $\text{CDCl}_3$ )  $\delta$  150.5, 144.8, 137.6, 136.9, 132.0, 129.5, 128.7, 124.3, 123.3, 121.8, 21.2, 20.6.

The analytical data are in accordance with those reported in the literature.<sup>2</sup>

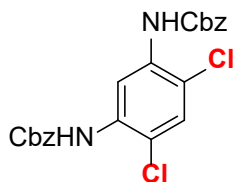

**dibenzyl (4,6-dichloro-1,3-phenylene)dicarbamate (3z)**

White solid.  $R_f = 0.45$  (PE:EtOAc = 10:1);  $^1\text{H}$  NMR (400 MHz,  $\text{CDCl}_3$ )  $\delta$  5.25 (s, 4H), 7.13 (s, 2H), 7.33 (s, 1H), 7.36-7.45 (m, 10H), 9.22 (s, 1H);  $^{13}\text{C}$  NMR (100 MHz,  $\text{CDCl}_3$ )  $\delta$  152.8, 135.8, 134.4, 128.8(2), 128.7, 115.9, 110.9, 67.7. HRMS (ESI) calcd for  $\text{C}_{22}\text{H}_{18}\text{Cl}_2\text{N}_2\text{O}_4\text{Na}$   $m/z$   $[\text{M}+\text{Na}]^+$ : 467.0536, found: 467.0536.

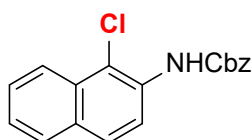

**benzyl (1-chloronaphthalen-2-yl)carbamate (3aa)**

White solid.  $R_f = 0.45$  (PE:EtOAc = 10:1);  $^1\text{H}$  NMR (400 MHz,  $\text{CDCl}_3$ )  $\delta$  5.27 (s, 2H), 7.37-7.42 (m, 7H), 7.46 (t,  $J = 7.8$  Hz, 1H), 7.80 (t,  $J = 10.0$  Hz, 2H), 8.16 (d,  $J = 8.0$  Hz, 1H), 8.41 (d,  $J = 9.2$  Hz, 1H);  $^{13}\text{C}$  NMR (100 MHz,  $\text{CDCl}_3$ )  $\delta$  153.4, 135.9, 132.8, 130.9, 130.8, 128.8, 128.7, 128.6, 128.2, 127.9, 127.7, 125.4, 123.8, 119.2, 117.3, 67.6. HRMS (ESI) calcd for  $\text{C}_{18}\text{H}_{15}\text{ClNO}_2$   $m/z$   $[\text{M}+\text{H}]^+$ : 312.0786, found: 312.0789.

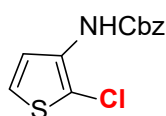

**benzyl (2-chlorothiophen-3-yl)carbamate (3ab)**

White solid.  $R_f = 0.50$  (PE:EtOAc = 10:1);  $^1\text{H}$  NMR (400 MHz,  $\text{CDCl}_3$ )  $\delta$  5.21 (s, 2H), 6.79 (s, 1H), 7.08 (d,  $J = 8.0$  Hz, 1H), 7.34-7.43 (m, 5H), 7.60 (s, 1H);  $^{13}\text{C}$  NMR (100 MHz,  $\text{CDCl}_3$ )  $\delta$  152.9, 135.8, 132.9, 128.8, 128.7, 128.6, 122.0, 121.3 67.7. HRMS (ESI) calcd for  $\text{C}_{12}\text{H}_{11}\text{ClNO}_2\text{S}$   $m/z$   $[\text{M}+\text{H}]^+$ : 268.0194, found: 268.0194.

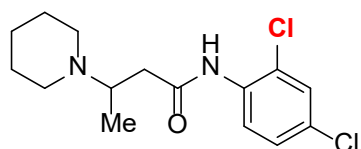

**N-(2,4-dichlorophenyl)-3-(piperidin-1-yl)butanamide (4a)**

Pale yellow solid.  $R_f = 0.35$  (PE:EtOAc = 2:1);  $^1\text{H}$  NMR (400 MHz,  $\text{CDCl}_3$ )  $\delta$  1.05 (d,  $J = 4.0$  Hz, 3H), 1.44-1.50 (m, 2H), 1.57-1.65 (m, 2H), 1.67-1.74 (m, 2H), 2.34 (dd,  $J = 4.0, 16.0$  Hz, 1H), 2.42-2.48 (m, 2H), 2.63-2.72 (m, 3H), 3.04-3.09 (m, 1H), 7.21

(dd,  $J = 4.0, 8.0$  Hz, 1H), 7.36 (d,  $J = 4.0$  Hz, 1H), 8.15 (d,  $J = 8.0$  Hz, 1H), 11.08 (s, 1H);  $^{13}\text{C}$  NMR (100 MHz,  $\text{CDCl}_3$ )  $\delta$  171.2, 134.4, 129.2, 129.0, 127.5, 124.9(2), 56.8, 49.0, 40.1, 26.0, 24.6, 13.3.

The analytical data are in accordance with those reported in the literature.<sup>15</sup>

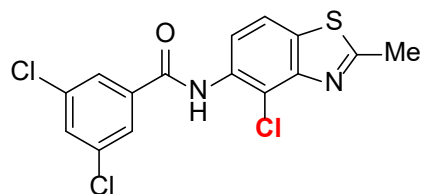

**3,5-dichloro-N-(6-chloro-2-methylbenzo[d]thiazol-5-yl)benzamide (4b)**

White solid.  $R_f = 0.50$  (PE:EtOAc = 2:1);  $^1\text{H}$  NMR (400 MHz,  $\text{CDCl}_3$ )  $\delta$  2.90 (s, 3H), 7.58 (d,  $J = 4.0$  Hz, 1H), 7.77 (d,  $J = 8.0$  Hz, 1H), 7.81 (s, 2H), 8.42 (s, 1H), 8.50 (d,  $J = 8.0$  Hz, 1H);  $^{13}\text{C}$  NMR (100 MHz,  $\text{CDCl}_3$ )  $\delta$  170.2, 163.0, 150.5, 137.5, 136.1, 132.6, 132.5, 132.3, 125.9, 120.2, 118.9, 116.3, 20.6. HRMS (ESI) calcd for  $\text{C}_{15}\text{H}_{10}\text{Cl}_3\text{N}_2\text{OS}$   $m/z$   $[\text{M}+\text{H}]^+$ : 370.9574, found: 370.9574.

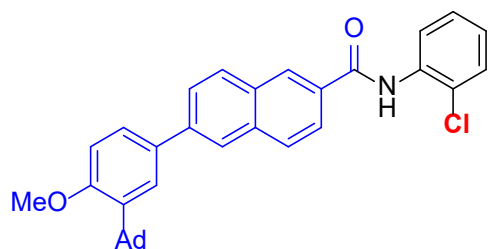

**6-(3-((3s)-adamantan-1-yl)-4-methoxyphenyl)-N-(2-chlorophenyl)-2-naphthamide (4c)**

White solid.  $R_f = 0.32$  (PE:EtOAc = 30:1);  $^1\text{H}$  NMR (400 MHz,  $\text{DMSO}-d_6$ )  $\delta$  1.79 (s, 6H), 2.08 (s, 3H), 2.16 (s, 6H), 3.92 (s, 3H), 7.00 (d,  $J = 8.0$  Hz, 2H), 7.13 (dd,  $J = 4.0, 8.0$  Hz, 1H), 7.39 (dt,  $J = 4.0, 8.0$  Hz, 2H), 7.45 (t,  $J = 8.0$  Hz, 2H), 7.60 (d,  $J = 12.0$  Hz, 1H), 7.94 (d,  $J = 8.0$  Hz, 1H), 8.09 (d,  $J = 4.0, 8.0$  Hz, 1H), 8.47 (d,  $J = 4.0$  Hz, 1H), 8.54 (d,  $J = 8.0$  Hz, 1H), 8.62-8.64 (m, 2H);  $^{13}\text{C}$  NMR (100 MHz,  $\text{CDCl}_3$ )  $\delta$  165.1, 158.7, 140.6, 138.3, 134.8, 133.3, 132.8, 132.2, 131.6, 130.4, 129.6, 129.2, 128.7, 128.2, 128.1, 127.9, 126.4, 125.1, 124.7, 123.3, 121.7, 111.3, 55.19, 40.7, 37.3(2), 29.2. HRMS(ESI) calcd for  $\text{C}_{34}\text{H}_{32}\text{ClNO}_2\text{Na}$   $m/z$   $[\text{M}+\text{Na}]^+$ : 544.2014, found: 544.2014.

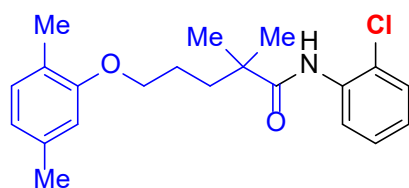

**N-(2-chlorophenyl)-5-(2,5-dimethylphenoxy)-2,2-dimethylpentanamide (4d)**

White solid.  $R_f = 0.50$  (PE:EtOAc = 5:1);  $^1\text{H}$  NMR (400 MHz,  $\text{CDCl}_3$ )  $\delta$  1.34 (s, 6H), 1.79-1.83 (m, 4H), 2.14 (s, 3H), 2.29 (s, 3H), 3.92 (t,  $J = 8.0$  Hz, 2H), 6.61 (s, 1H),

7.07 (s, 1H), 7.11 (t,  $J = 8.0$  Hz, 1H), 7.30-7.34 (m, 3H), 7.51 (d,  $J = 8.0$  Hz, 2H);  $^{13}\text{C}$  NMR (100 MHz,  $\text{CDCl}_3$ )  $\delta$  175.7, 155.6, 137.9, 133.9, 130.7, 129.1(2), 125.9, 125.0, 124.5, 121.4, 120.2, 113.7, 68.4, 42.9, 37.8, 25.8, 25.2, 20.2, 15.8. HRMS (ESI) calcd for  $\text{C}_{21}\text{H}_{26}\text{ClNO}_2\text{Na}$   $m/z$   $[\text{M}+\text{Na}]^+$ : 382.1544, found: 382.1544.

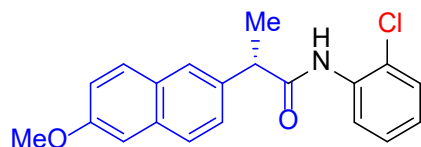

**(S)-N-(2-chlorophenyl)-2-(6-methoxynaphthalen-2-yl)propanamide (4e)**

White solid.  $R_f = 0.55$  (PE:EtOAc = 5:1);  $^1\text{H}$  NMR (400 MHz,  $\text{CDCl}_3$ )  $\delta$  1.72 (d,  $J = 8.0$  Hz, 3H), 3.95 (q,  $J = 8.0$  Hz, 1H), 4.04 (s, 3H), 6.98 (dt,  $J = 4.0, 8.0$  Hz, 1H), 7.22-7.26 (m, 2H), 7.32-7.35 (m, 1H), 7.58 (d,  $J = 8.0$  Hz, 1H), 7.68 (s, 1H), 7.79 (d,  $J = 8.0$  Hz, 1H), 7.81 (s, 1H), 8.25 (d,  $J = 8.0$  Hz, 1H), 8.37 (d,  $J = 8.0$  Hz, 1H);  $^{13}\text{C}$  NMR (100 MHz,  $\text{CDCl}_3$ )  $\delta$  172.3, 152.9, 136.4, 134.6, 131.4, 129.7, 129.0, 127.9, 127.8, 127.5, 126.8, 124.9, 124.7, 122.8, 121.4, 116.9, 114.3, 57.1, 48.3, 18.3. HRMS (ESI) calcd for  $\text{C}_{20}\text{H}_{18}\text{ClNO}_2\text{K}$   $m/z$   $[\text{M}+\text{K}]^+$ : 378.0658, found: 378.0658.

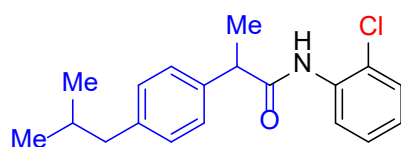

**N-(2-chlorophenyl)-2-(4-isobutylphenyl)propanamide (4f)**

White solid.  $R_f = 0.32$  (PE:EtOAc = 8:1);  $^1\text{H}$  NMR (400 MHz,  $\text{CDCl}_3$ )  $\delta$  0.89 (d,  $J = 8.0$  Hz, 6H), 1.65 (s, 3H), 1.84-1.88 (m, 1H), 2.48 (d,  $J = 8.0$  Hz, 2H), 3.77 (q,  $J = 8.0$  Hz, 1H), 6.97 (dt,  $J = 4.0, 8.0$  Hz, 1H), 7.17-7.30 (m, 6H), 7.63 (s, 1H), 8.38 (d,  $J = 8.0$  Hz, 1H);  $^{13}\text{C}$  NMR (100 MHz,  $\text{CDCl}_3$ )  $\delta$  172.9, 141.5, 137.5, 134.8, 130.1, 128.9, 127.8(2), 124.4, 122.7, 121.1, 48.2, 45.1, 30.4, 22.4, 18.0. HRMS (ESI) calcd for  $\text{C}_{19}\text{H}_{22}\text{ClNONa}$   $m/z$   $[\text{M}+\text{Na}]^+$ : 338.1282, found: 338.1288.

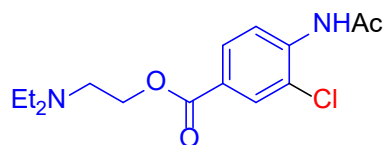

**2-(diethylamino)ethyl 4-acetamido-3-chlorobenzoate (4g)**

White solid.  $R_f = 0.45$  (DCM:MeOH = 8:1);  $^1\text{H}$  NMR (400 MHz,  $\text{CDCl}_3$ )  $\delta$  1.06 (t,  $J = 8.0$  Hz, 6H), 2.27 (s, 3H), 2.63 (q,  $J = 8.0$  Hz, 4H), 2.85 (d,  $J = 8.4$  Hz, 2H), 4.37 (d,  $J = 8.0$  Hz, 2H), 7.81 (s, 1H), 7.92 (d,  $J = 8.4$  Hz, 1H), 8.04 (s, 1H), 8.52 (d,  $J = 12.0$  Hz, 1H);  $^{13}\text{C}$  NMR (100 MHz,  $\text{CDCl}_3$ )  $\delta$  168.6, 165.2, 138.6, 130.5, 129.5, 126.2, 121.9, 120.3, 63.6, 51.0, 47.9, 25.2, 12.0. HRMS (ESI) calcd for  $\text{C}_{15}\text{H}_{22}\text{ClN}_2\text{O}_3$   $m/z$   $[\text{M}+\text{H}]^+$ : 313.1314, found: 313.1313.

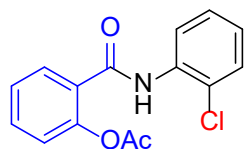

**2-((2-chlorophenyl)carbamoyl)phenyl acetate (4h)**

White solid.  $R_f = 0.50$  (PE:EtOAc = 5:1);  $^1\text{H NMR}$  (400 MHz,  $\text{CDCl}_3$ )  $\delta$  2.38 (s, 3H), 7.09 (t,  $J = 8.0$  Hz, 1H), 7.19 (d,  $J = 8.0$  Hz, 1H), 7.31-7.42 (m, 3H), 7.36 (t,  $J = 8.0$  Hz, 2H), 7.98 (d,  $J = 8.0$  Hz, 1H), 8.58 (t,  $J = 8.0$  Hz, 1H), 8.74 (s, 1H);  $^{13}\text{C NMR}$  (100 MHz,  $\text{CDCl}_3$ )  $\delta$  169.0, 163.4, 148.1, 134.9, 132.8, 130.7, 129.2, 128.1, 127.9, 126.7, 125.0, 123.7, 122.8, 121.9, 21.5. HRMS (ESI) calcd for  $\text{C}_{15}\text{H}_{12}\text{ClNO}_3\text{Na}$   $m/z$   $[\text{M}+\text{Na}]^+$ : 312.0398, found: 312.0398.

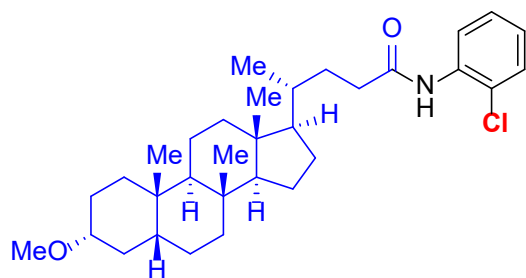

**(R)-N-(2-chlorophenyl)-4-((3R,5R,8R,9R,10S,13R,14R,17R)-3-methoxy-8,10,13-trimethylhexadecahydro-1H-cyclopenta[a]phenanthren-17-yl)pentanamide (4i)**

White solid.  $R_f = 0.42$  (PE:EtOAc = 8:1);  $^1\text{H NMR}$  (400 MHz,  $\text{CDCl}_3$ )  $\delta$  0.65 (s, 3H), 0.93 (s, 3H), 0.97 (d,  $J = 8.0$  Hz, 3H), 1.02-1.17 (m, 6H), 1.20-1.51 (m, 13H), 1.54-1.62 (m, 2H), 1.64-1.75 (m, 1H), 1.74-1.98 (m, 6H), 2.29-2.36 (m, 1H), 2.45-2.53 (m, 1H), 3.12-3.20 (m, 1H), 3.35 (s, 3H), 7.03 (t,  $J = 8.0$  Hz, 1H), 7.24-7.27 (m, 1H), 7.36 (d,  $J = 8.0$  Hz, 1H), 7.62 (s, 1H), 8.38 (d,  $J = 8.0$  Hz, 1H);  $^{13}\text{C NMR}$  (100 MHz,  $\text{CDCl}_3$ )  $\delta$  171.9, 134.8, 129.1, 127.9, 124.6, 122.6, 121.7, 80.5, 56.6, 56.1, 55.7, 42.9, 42.2, 40.5, 40.3, 35.9, 35.5, 35.4, 35.0, 32.9, 31.7, 28.4, 27.5, 26.9, 26.5, 24.4, 23.6, 20.9, 18.5, 12.2. HRMS(ESI) calcd for  $\text{C}_{32}\text{H}_{48}\text{ClNO}_2\text{Na}$   $m/z$   $[\text{M}+\text{Na}]^+$ : 536.3266, found: 536.3266.

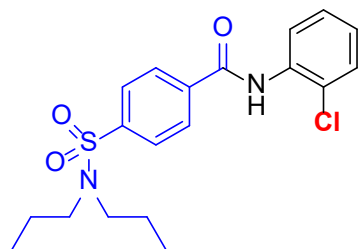

**N-(2-chlorophenyl)-4-(N,N-dipropylsulfamoyl)benzamide (4j)**

White solid.  $R_f = 0.50$  (PE:EtOAc = 6:1);  $^1\text{H NMR}$  (400 MHz,  $\text{CDCl}_3$ )  $\delta$  0.88 (t,  $J = 8.0$  Hz, 6H), 1.54-1.61 (m, 4H), 3.12(t,  $J = 8.0$  Hz, 4H), 7.13 (t,  $J = 8.0$  Hz, 1H), 7.36 (t,  $J = 8.0$  Hz, 1H), 7.44 (d,  $J = 8.0$  Hz, 1H), 7.95 (d,  $J = 8.0$  Hz, 2H), 8.03 (d,  $J = 8.0$  Hz, 2H), 8.44 (s, 1H), 8.52 ( $J = 8.0$  Hz, 1H);  $^{13}\text{C NMR}$  (100 MHz,  $\text{CDCl}_3$ )  $\delta$  163.9, 143.8, 138.0, 134.4, 129.3, 128.1, 127.9, 127.8, 125.5, 123.4, 121.8, 50.1, 22.1, 11.3.

HRMS (ESI) calcd for C<sub>19</sub>H<sub>23</sub>ClN<sub>2</sub>O<sub>3</sub>SNa *m/z* [M+Na]<sup>+</sup>: 417.1010, found: 417.1010.

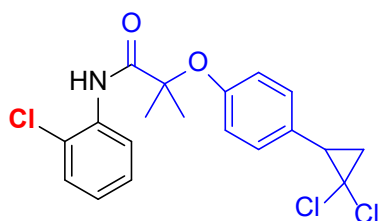

**N-(2-chlorophenyl)-2-(4-(2,2-dichlorocyclopropyl)phenoxy)-2-methylpropanamide (4k)**

White solid. *R<sub>f</sub>* = 0.45 (PE:EtOAc = 6:1); <sup>1</sup>H NMR (400 MHz, CDCl<sub>3</sub>) δ 1.62 (s, 6H), 1.81 (t, *J* = 8.0 Hz, 1H), 1.95-2.00 (s, 1H), 2.85 (t, *J* = 8.0 Hz, 1H), 7.01 (d, *J* = 8.0 Hz, 2H), 7.07 (dt, *J* = 4.0, 8.0 Hz, 1H), 7.19 (d, *J* = 8.0 Hz, 2H), 7.31 (t, *J* = 8.0 Hz, 1H), 7.37 (d, *J* = 8.0 Hz, 1H), 8.45 (d, *J* = 8.0 Hz, 1H), 9.28 (s, 1H); <sup>13</sup>C NMR (100 MHz, CDCl<sub>3</sub>) δ 173.2, 153.6, 134.4, 130.3, 130.0, 129.3, 127.8, 124.9, 123.6, 121.7, 121.4, 82.4, 60.8, 35.0, 26.0, 25.2 (2). HRMS (ESI) calcd for C<sub>19</sub>H<sub>18</sub>Cl<sub>3</sub>NO<sub>2</sub>Na *m/z* [M+Na]<sup>+</sup>: 420.0295, found: 420.0295.

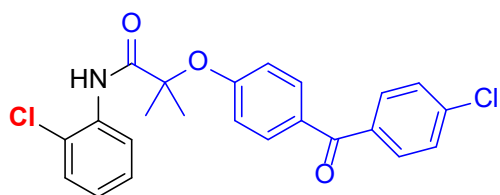

**N-(2-chlorophenyl)-2-methyl-2-(4-(4-methylbenzoyl)phenoxy)propanamide (4l)**

White solid. *R<sub>f</sub>* = 0.50 (PE:EtOAc = 10:1); <sup>1</sup>H NMR (400 MHz, CDCl<sub>3</sub>) δ 1.71 (s, 6H), 7.05-7.09 (m, 3H), 7.31 (t, *J* = 8.0 Hz, 1H), 7.37 (dd, *J* = 4.0, 8.0 Hz, 1H), 7.45 (d, *J* = 8.0 Hz, 2H), 7.72 (d, *J* = 8.0 Hz, 2H), 7.77 (d, *J* = 8.0 Hz, 2H), 8.41 (d, *J* = 8.0 Hz, 1H), 9.02 (s, 1H); <sup>13</sup>C NMR (100 MHz, CDCl<sub>3</sub>) δ 194.4, 172.5, 158.4, 138.8, 136.2, 134.2, 132.2, 132.1, 131.4, 129.3, 128.8, 127.9, 125.2, 123.5, 121.5, 120.1, 82.7, 25.3. HRMS (ESI) calcd for C<sub>23</sub>H<sub>20</sub>Cl<sub>2</sub>NO<sub>3</sub> *m/z* [M+H]<sup>+</sup>: 428.0815, found: 428.0815.

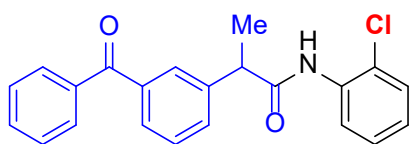

**2-(3-benzoylphenyl)-N-(2-chlorophenyl)propanamide (4m)**

White solid. *R<sub>f</sub>* = 0.45 (PE:EtOAc = 5:1); <sup>1</sup>H NMR (400 MHz, CDCl<sub>3</sub>) δ 1.67 (d, *J* = 8.0 Hz, 3H), 3.87 (q, *J* = 8.0 Hz, 1H), 7.02 (dt, *J* = 4.0, 8.0 Hz, 1H), 7.23-7.27 (m, 1H), 7.30 (d, *J* = 8.0 Hz, 1H), 7.45-7.50 (m, 2H), 7.53 (d, *J* = 8.0 Hz, 1H), 7.58-7.67 (m, 3H), 7.73 (d, *J* = 8.0 Hz, 1H), 7.80 (d, *J* = 8.0 Hz, 2H), 7.84 (s, 1H), 8.36 (dd, *J* = 4.0, 8.0 Hz, 1H); <sup>13</sup>C NMR (100 MHz, CDCl<sub>3</sub>) δ 196.5, 171.8, 141.0, 138.5, 137.5, 134.5, 132.8, 131.8, 130.2, 129.7, 129.4, 129.3, 129.1, 128.5, 127.9, 124.9, 122.9, 121.4, 48.4, 18.4. HRMS (ESI) calcd for C<sub>22</sub>H<sub>19</sub>ClNO<sub>2</sub> *m/z* [M+H]<sup>+</sup>: 364.1099, found: 364.1099.

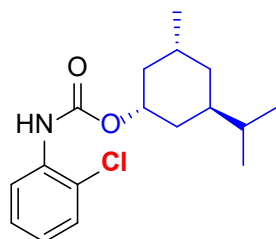

**(1R,3R,5R)-3-isopropyl-5-methylcyclohexyl (2-chlorophenyl)carbamate (5n)**

White solid.  $R_f = 0.45$  (PE:EtOAc = 5:1);  $^1\text{H NMR}$  (400 MHz,  $\text{CDCl}_3$ )  $\delta$  0.82 (d,  $J = 8.0$  Hz, 3H), 0.87-0.97 (m, 1H), 0.93 (d,  $J = 4.0$  Hz, 6H), 1.01-1.14 (m, 2H), 1.37-1.45 (m, 1H), 1.48-1.57 (m, 1H), 1.67-1.73 (m, 2H), 1.94-2.00 (m, 1H), 2.08-2.14 (m, 1H), 4.69 (dt,  $J = 4.0, 8.0$  Hz, 1H), 6.98 (dt,  $J = 4.0, 8.0$  Hz, 1H), 7.10 (s, 1H), 7.26 (t,  $J = 8.0$  Hz, 1H), 7.34 (d,  $J = 8.0$  Hz, 1H), 8.20 (d,  $J = 8.0$  Hz, 1H);  $^{13}\text{C NMR}$  (100 MHz,  $\text{CDCl}_3$ )  $\delta$  153.1, 135.1, 129.1, 127.9, 123.6, 121.9, 119.9, 75.7, 47.3, 41.4, 34.4, 31.6, 26.4, 23.6, 22.2, 20.9, 16.5. HRMS (ESI) calcd for  $\text{C}_{17}\text{H}_{25}\text{ClNO}_2$   $m/z$   $[\text{M}+\text{H}]^+$ : 310.1568, found: 310.1568.

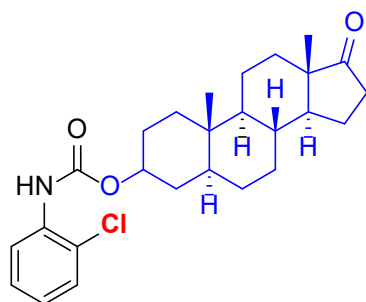

**(5S,8R,10S,13S,14S)-10,13-dimethyl-17-oxohexadecahydro-1H-cyclopenta[a]phenanthren-3-yl (2-chlorophenyl)carbamate (5o)**

White solid.  $R_f = 0.40$  (PE:EtOAc = 5:1);  $^1\text{H NMR}$  (400 MHz,  $\text{CDCl}_3$ )  $\delta$  0.74 (dt,  $J = 4.0, 8.0$  Hz, 1H), 0.86 (s, 3H), 0.87 (s, 3H), 0.94-1.11 (m, 2H), 1.20-1.41 (m, 6H), 1.43-1.62 (m, 4H), 1.64-1.82 (m, 5H), 1.90-1.97 (m, 2H), 2.03-2.12 (m, 1H), 2.40-2.47 (m, 1H), 4.67-4.75 (m, 1H), 6.98 (dt,  $J = 4.0, 8.0$  Hz, 1H), 7.09 (s, 1H), 7.26 (t,  $J = 8.0$  Hz, 1H), 7.34 (d,  $J = 8.0$  Hz, 1H), 8.15 (d,  $J = 8.0$  Hz, 1H);  $^{13}\text{C NMR}$  (100 MHz,  $\text{CDCl}_3$ )  $\delta$  152.9, 135.0, 129.7, 127.9, 123.6, 122.0, 119.9, 75.0, 54.4, 51.5, 47.9, 44.8, 36.9, 36.0, 35.8, 35.2, 34.3, 31.7, 31.0, 28.4, 27.9, 21.9, 20.6, 14.0, 12.4. HRMS (ESI) calcd for  $\text{C}_{26}\text{H}_{35}\text{ClNO}_3$   $m/z$   $[\text{M}+\text{H}]^+$ : 444.2300, found: 444.2300.

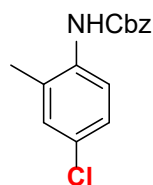

**benzyl (4-chloro-2-methylphenyl)carbamate (7)**

White solid.  $R_f = 0.45$  (PE:EtOAc = 10:1);  $^1\text{H NMR}$  (400 MHz,  $\text{CDCl}_3$ )  $\delta$  2.38 (s, 3H), 5.20 (s, 2H), 6.41 (s, 1H), 7.17 (dt,  $J = 4.0, 8.0$  Hz, 2H), 7.34-7.43 (m, 5H), 7.79 (s, 1H);  $^{13}\text{C NMR}$  (100 MHz,  $\text{CDCl}_3$ )  $\delta$  153.6, 135.9, 134.5, 130.3, 128.8, 128.6(2),



126.9, 67.4, 17.7. HRMS (ESI) calcd for  $C_{15}H_{14}ClNO_2Na$   $m/z$   $[M+Na]^+$ : 298.0605, found: 298.0607.

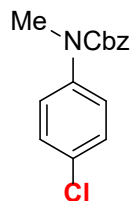

**benzyl (4-chlorophenyl)(methyl)carbamate (9)**

White solid.  $R_f$  = 0.50 (PE:EtOAc = 10:1);  $^1H$  NMR (400 MHz,  $CDCl_3$ )  $\delta$  3.31 (s, 3H), 5.18 (s, 2H), 7.20 (d,  $J$  = 8.0 Hz, 2H), 7.30-7.35 (m, 7H);  $^{13}C$  NMR (100 MHz,  $CDCl_3$ )  $\delta$  155.3, 141.9, 136.5, 131.6, 129.0, 128.6, 128.1, 127.9, 127.0, 67.6, 37.7. HRMS (ESI) calcd for  $C_{15}H_{14}ClNO_2Na$   $m/z$   $[M+Na]^+$ : 298.0605, found: 298.0605.

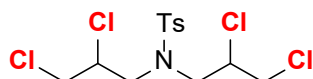

**N,N-bis(2,3-dichloropropyl)-4-methylbenzenesulfonamide (11)**

White solid.  $R_f$  = 0.32 (PE:EtOAc = 10:1);  $^1H$  NMR (400 MHz,  $CDCl_3$ )  $\delta$  2.46 (s, 3H), 3.12-3.18 (m, 1H), 3.34-3.40 (m, 1H), 3.75-3.82 (m, 3H), 3.84-3.90 (m, 3H), 4.48-4.56 (m, 2H), 7.38 (dd,  $J$  = 4.0, 8.0 Hz, 2H), 7.73 (dd,  $J$  = 4.0, 8.0 Hz, 2H);  $^{13}C$  NMR (100 MHz,  $CDCl_3$ )  $\delta$  144.9, 144.8, 134.6, 134.1, 130.3(2), 127.8(2), 58.6, 58.4, 54.8(2), 46.5, 46.4, 21.8.

The analytical data are in accordance with those reported in the literature.<sup>15</sup>

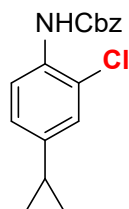

**benzyl (2-chloro-4-cyclopropylphenyl)carbamate (14)**

White solid.  $R_f$  = 0.50 (PE:EtOAc = 10:1);  $^1H$  NMR (400 MHz,  $CDCl_3$ )  $\delta$  0.62-0.66 (m, 2H), 0.92-0.97 (m, 2H), 3.34-3.40 (m, 1H), 1.80-1.87 (m, 1H), 5.21 (s, 2H), 6.98 (dd,  $J$  = 4.0, 8.0 Hz, 2H), 7.05 (s, 1H), 7.09 (s, 1H), 7.35-7.44 (s, 5H), 8.02 (d,  $J$  = 8.0 Hz, 1H);  $^{13}C$  NMR (100 MHz,  $CDCl_3$ )  $\delta$  153.2, 140.3, 136.0, 132.1, 128.8, 128.6(2), 126.4, 125.3, 122.3, 120.2, 67.4, 14.8, 9.1. HRMS (ESI) calcd for  $C_{17}H_{17}ClNO_2$   $m/z$   $[M+H]^+$ : 302.0942, found: 302.0942.

### (D) Scale-Up of the Chlorination and Deprotection

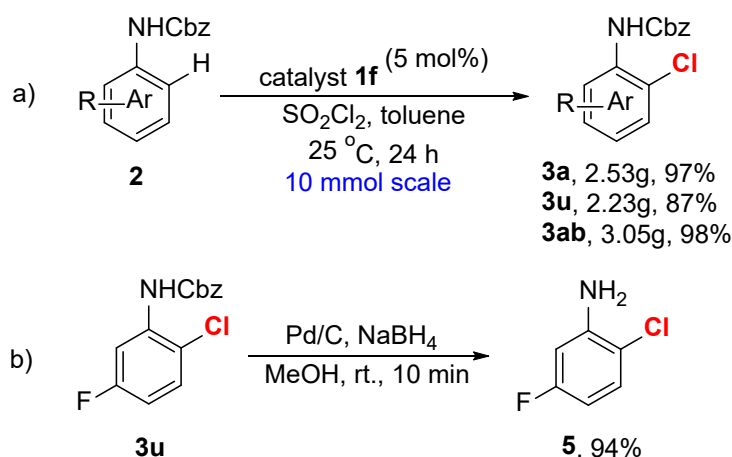

Furthermore, this catalytic protocol could be easily scaled up without selectivity deterioration and the catalyst loading could also be further decreased. The *ortho*-chlorination of **2a**, **2u** and **2ab** on a 10 mmol scale were completed in 24 h with only 5 mol% secondary amine **1f** to furnish the corresponding products **3a**, **3u** and **3ab** in excellent yield. The benzyloxycarbonyl group of the *ortho*-chlorinated product **3u** can be efficiently removed using NaBH<sub>4</sub> in the presence of Pd/C in methanol to give aniline **5** in 98% yield. The advantages of practical and environmental benign features make this chlorination methodology more attractive in the industrial synthesis.

### (E) Representative procedure for the large scale preparation of **3a**

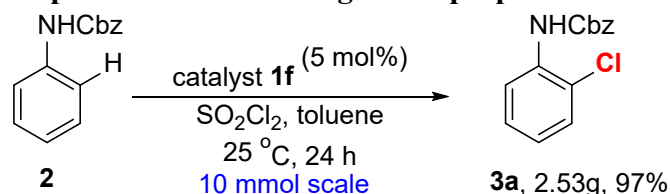

To a solution of catalyst **1f** (50.5 mg, 0.5 mmol) and substrate **2a** (2.27 g, 10.0 mmol) in toluene (80 mL) was added dropwise SO<sub>2</sub>Cl<sub>2</sub> (2.7 g, 20.0 mmol) over 30 min in the absence of light at 0 °C. Then the resulting mixture was stirred at 25 °C for 24 h. Upon completion, the reaction was quenched with saturated aqueous Na<sub>2</sub>SO<sub>3</sub> (30 mL). The organic layer was separated, and the aqueous layer was extracted with dichloromethane (3×15 mL). The combined organic layers were dried over anhydrous Na<sub>2</sub>SO<sub>4</sub>, filtered, and concentrated under reduced pressure. The residue was purified by silica gel column chromatography (hexane/EtOAc = 20:1) to yield **3a** as white solid (97%, 2.53 g).

**(F) General procedure for *N*-Cbz deprotection**

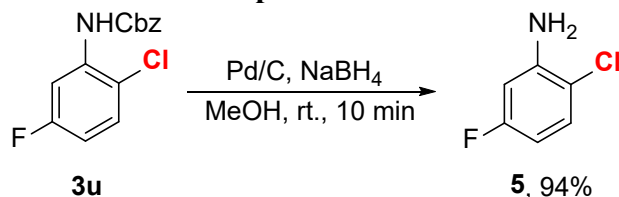

To a stirred solution of substrate **3u** (0.28 g, 1 mmol) and 10 % Pd/C (20 mg, 10 wt%) in MeOH (20 mL) was added NaBH<sub>4</sub> (56.8 mg, 1.5 mmol) portion wise using solid addition funnel. A septum with an empty balloon was placed to avoid the loss of generated hydrogen and overpressure in the flask. After completion of reaction (10 min), reaction mixture was filtered through celite and filtrate was evaporated to dryness to afford crude amine which upon purification using flash chromatography (hexane/EtOAc = 30:1) afforded pure amine **5** (136.3 mg, 94%). *R<sub>f</sub>* = 0.50 (PE:EtOAc = 10:1); <sup>1</sup>H NMR (400 MHz, CDCl<sub>3</sub>) δ 4.14 (s, 2H), 6.40 (t, *J* = 4.0, 8.0 Hz, 1H), 6.47 (d, *J* = 8.0 Hz, 1H), 7.15-7.19 (m, 1H); <sup>13</sup>C NMR (100 MHz, CDCl<sub>3</sub>) δ 163.5, 161.1, 144.3, 144.2, 130.4, 130.3, 114.3(2), 106.0, 105.8, 102.8, 102.5. The analytical data are in accordance with those reported in the literature.<sup>16</sup>

**(G) X-ray diffraction data of **3u** (CCDC 2158109)**

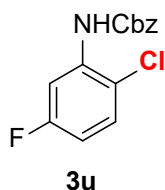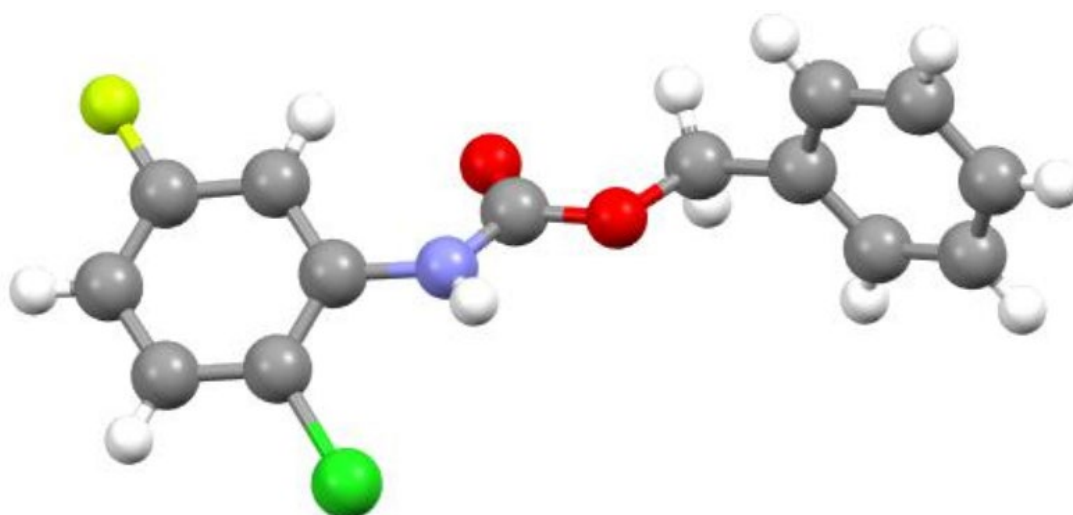

**(H) Examples of crude NMR and GC/MS spectra for determination of the regioselectivity of the *ortho*-chlorination**

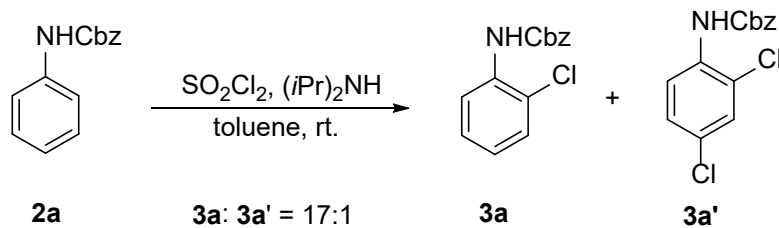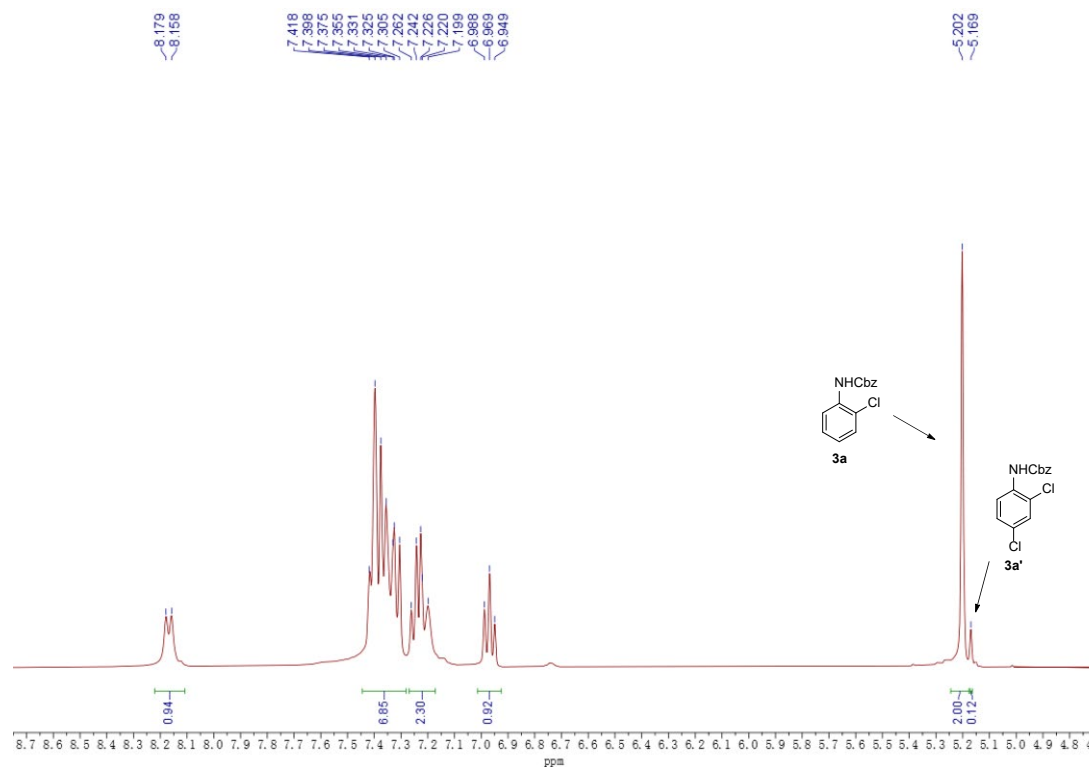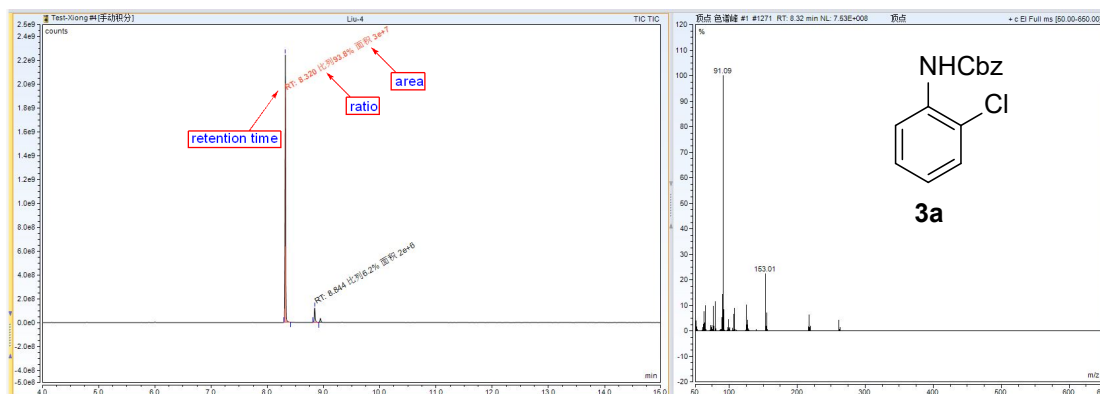

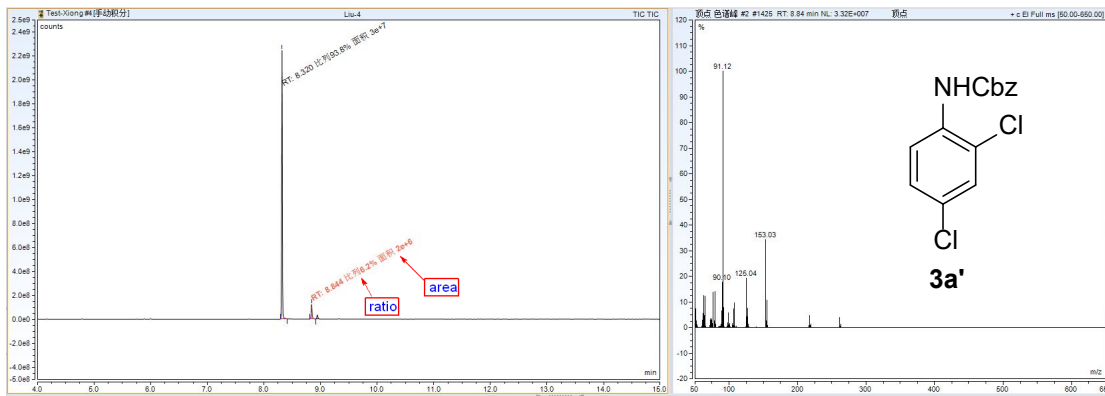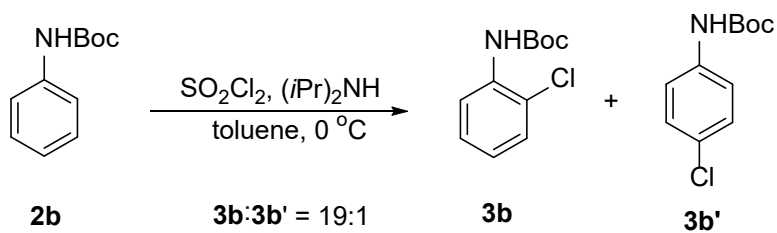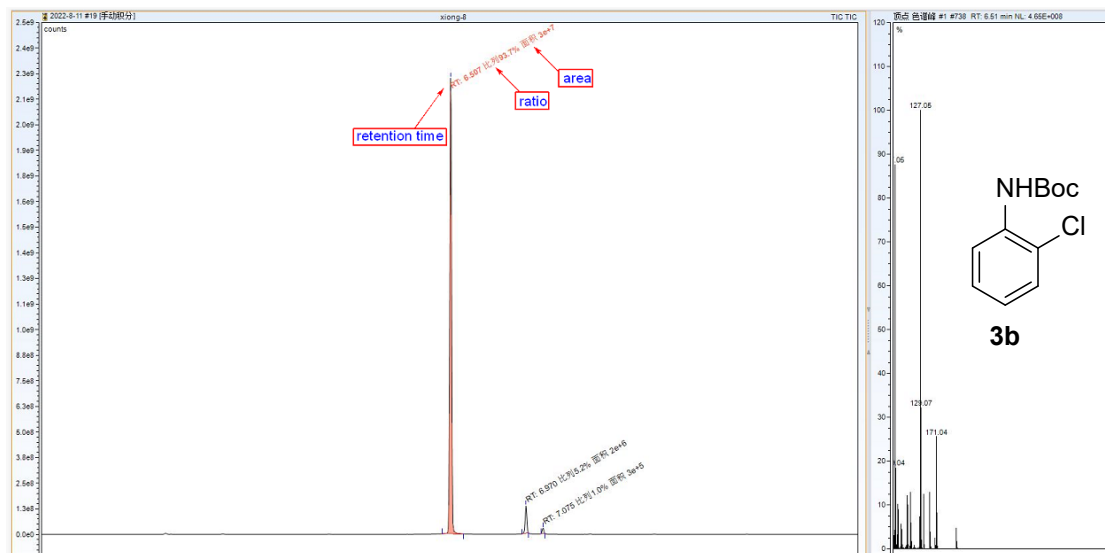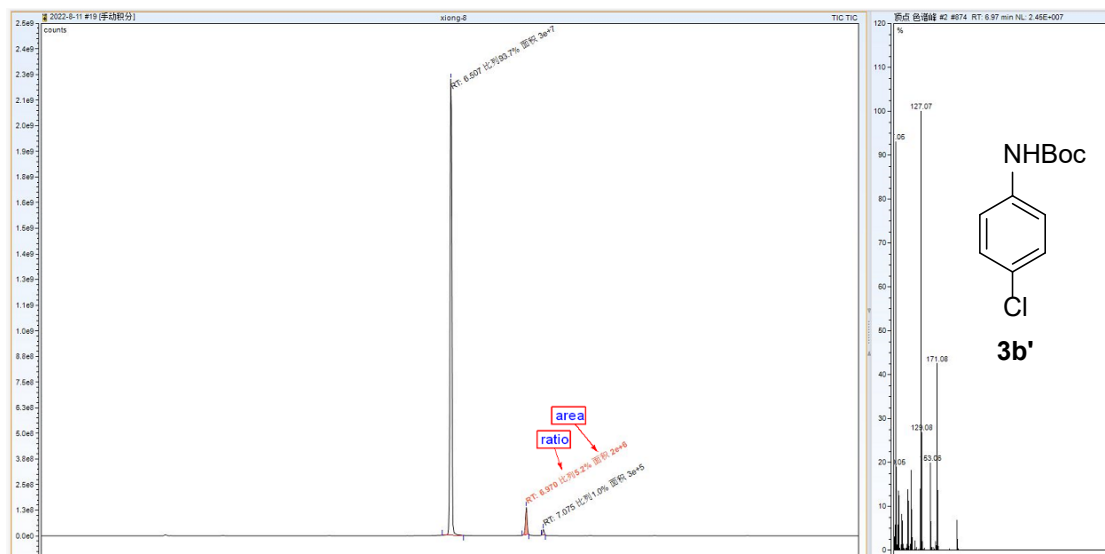

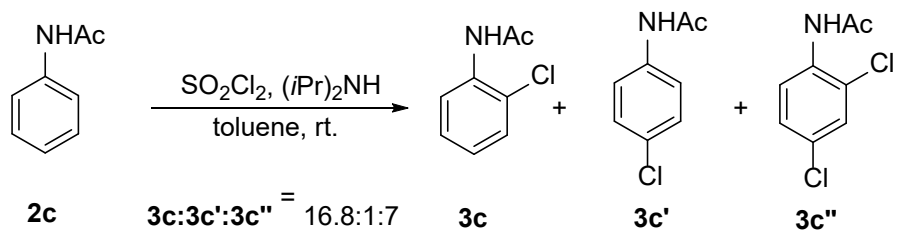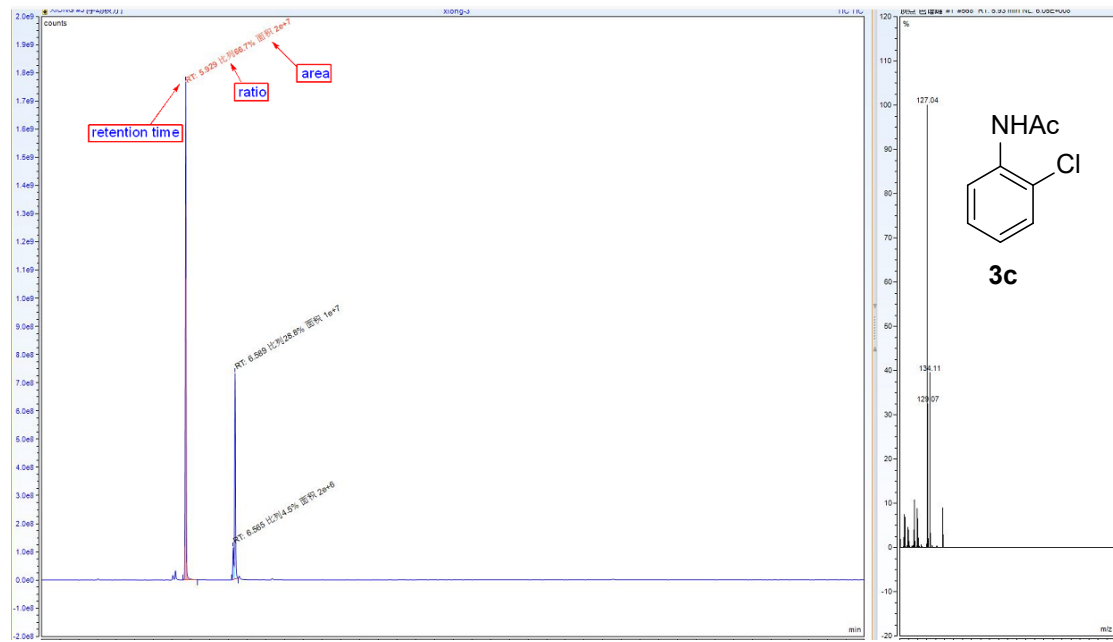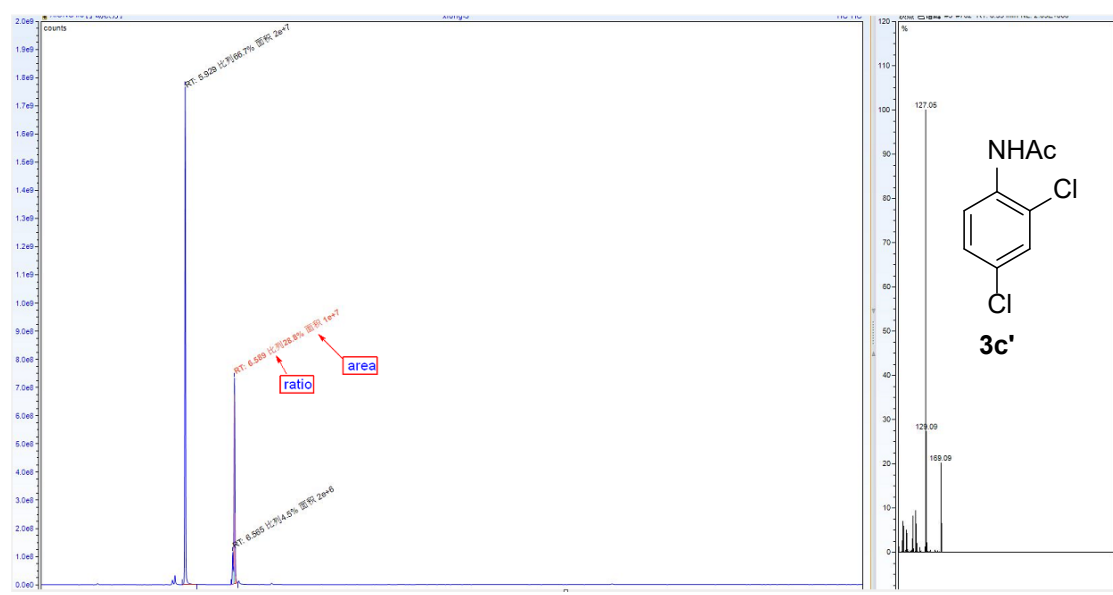

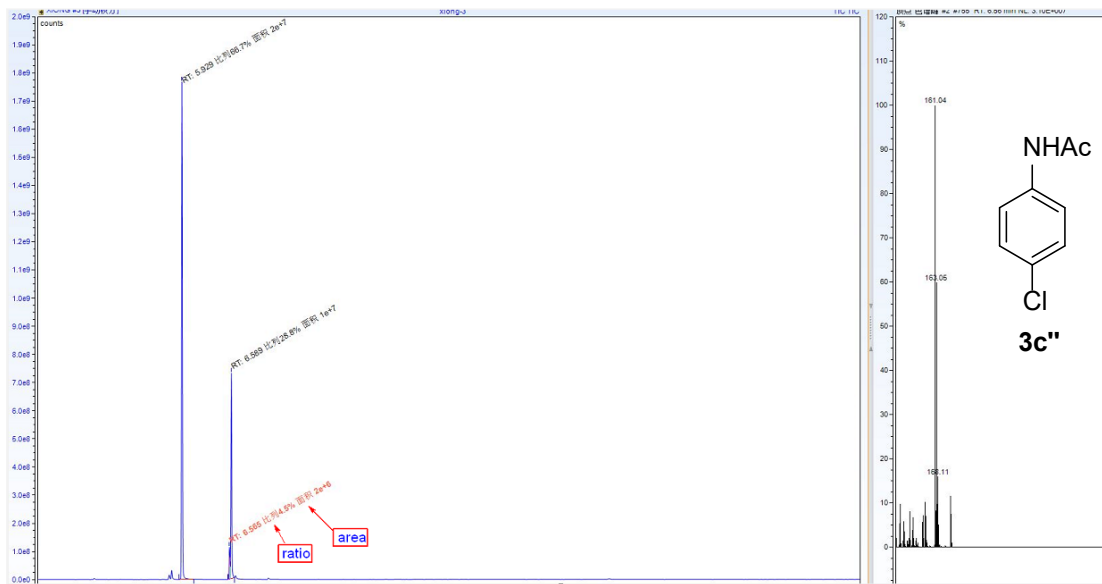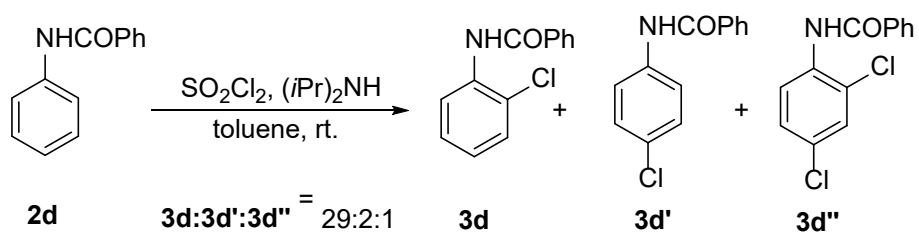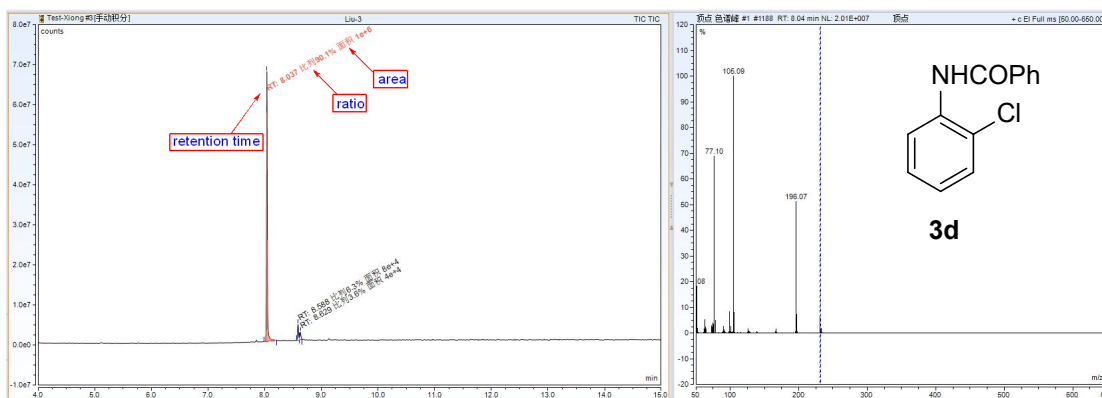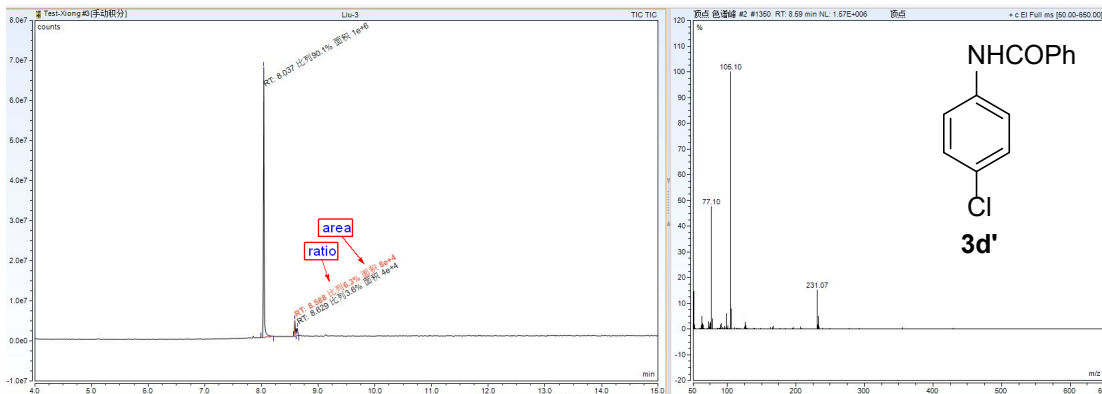

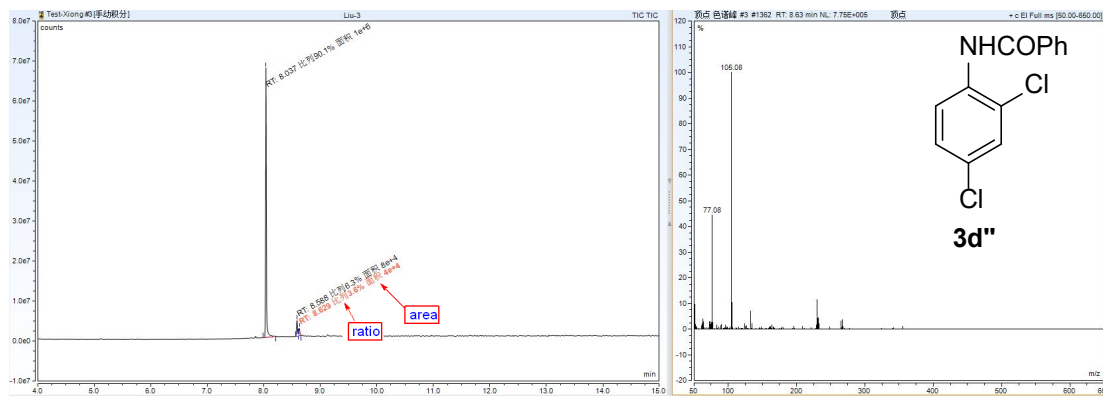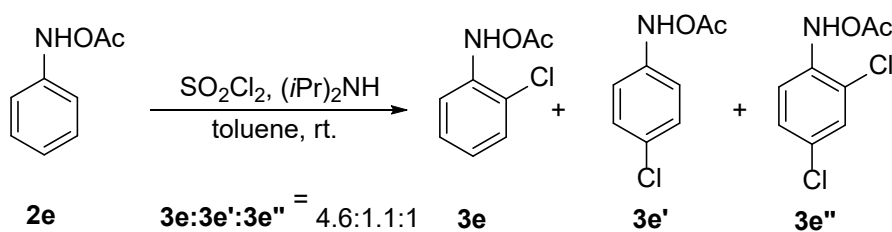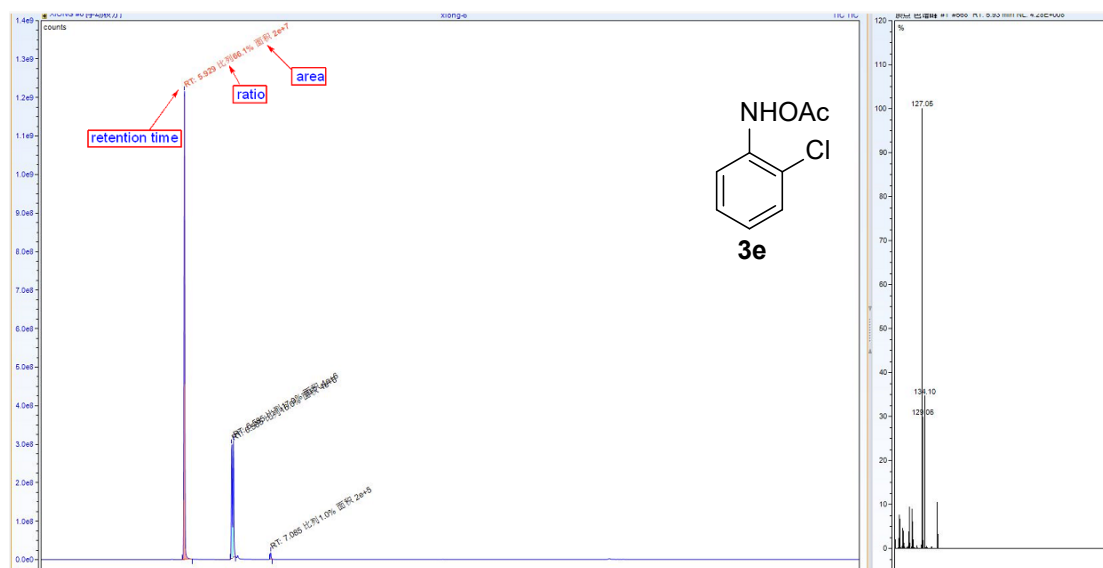



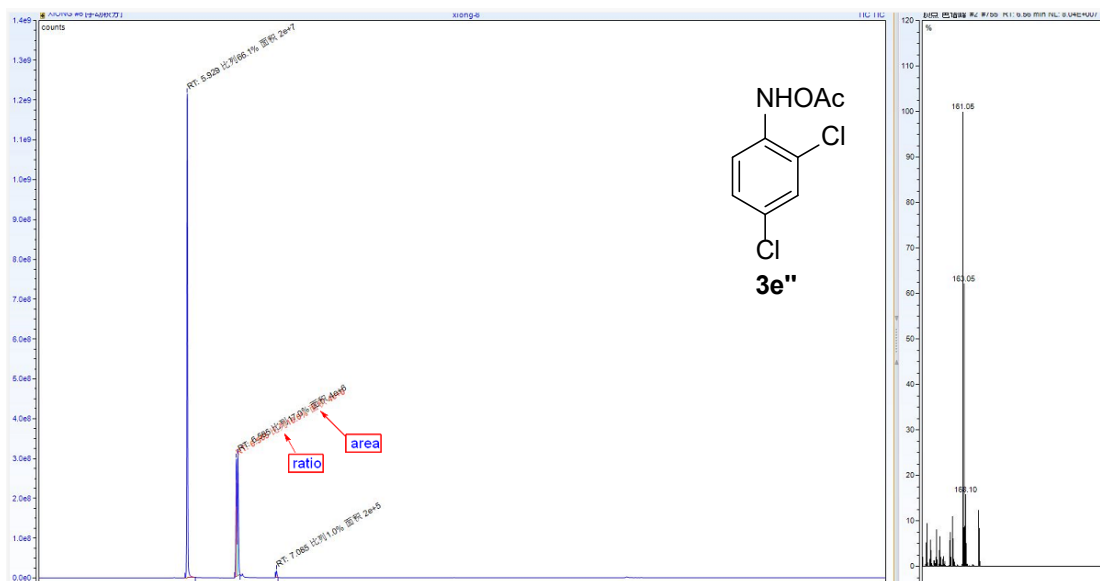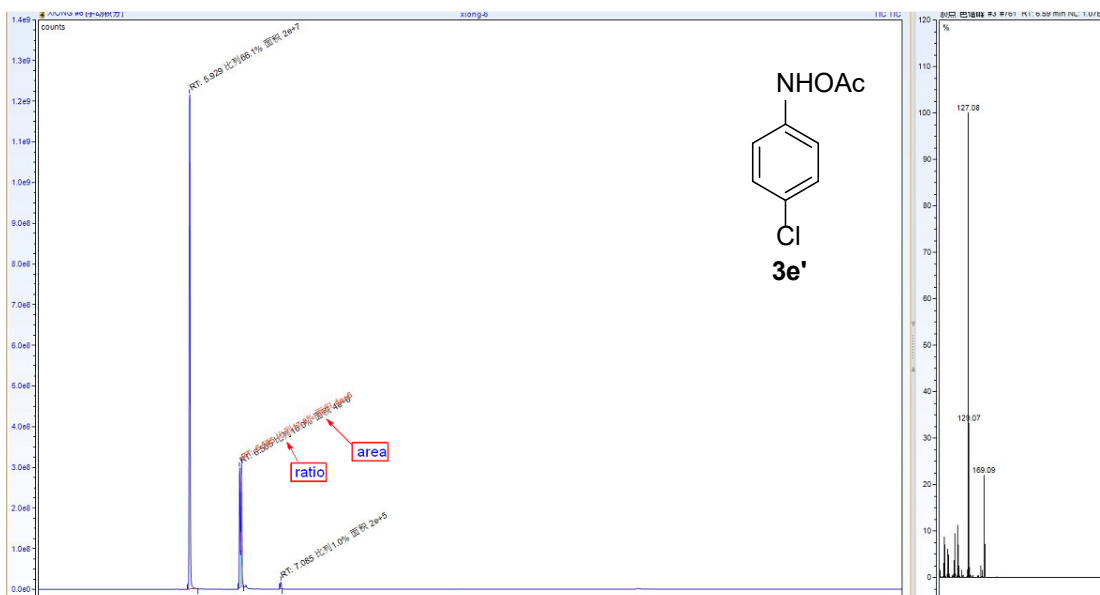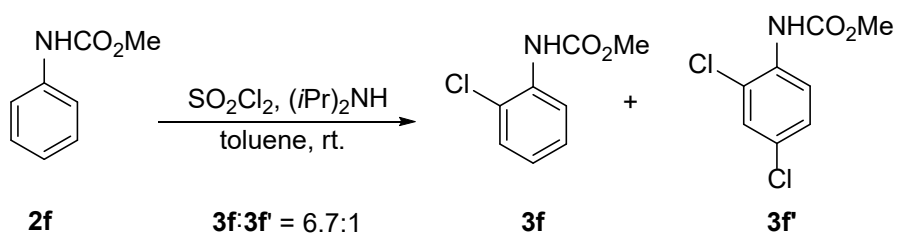

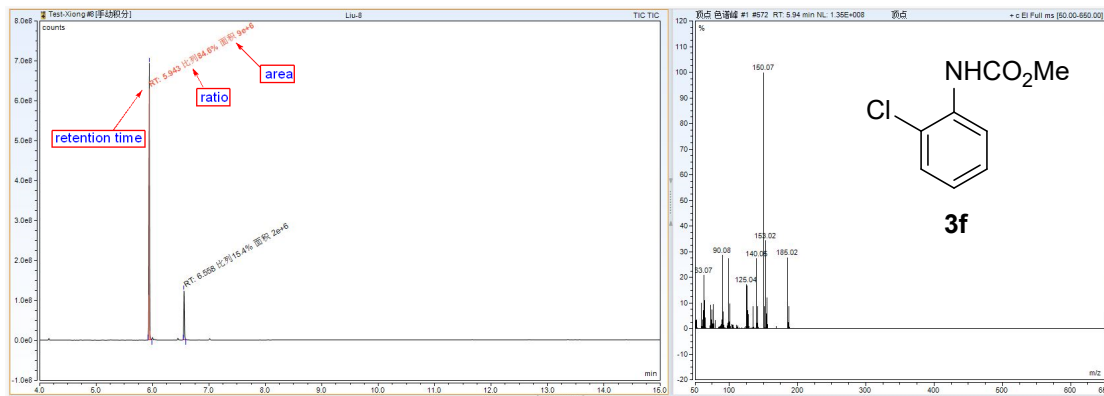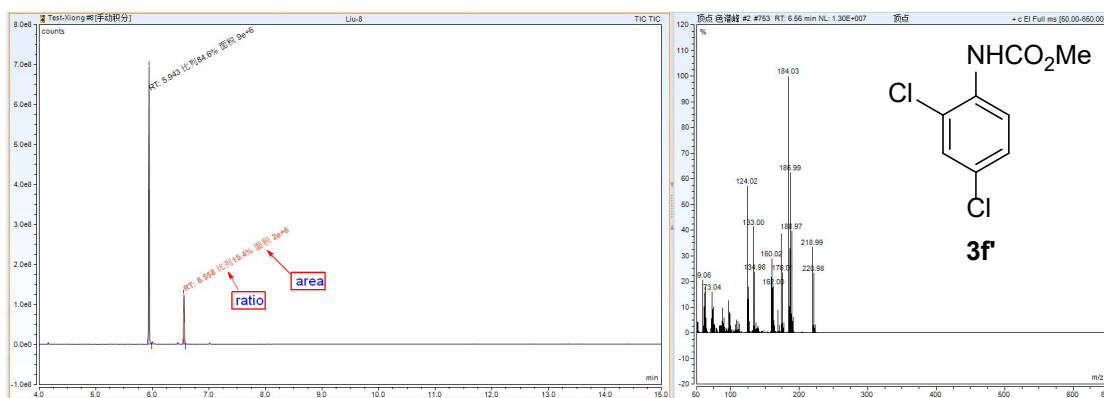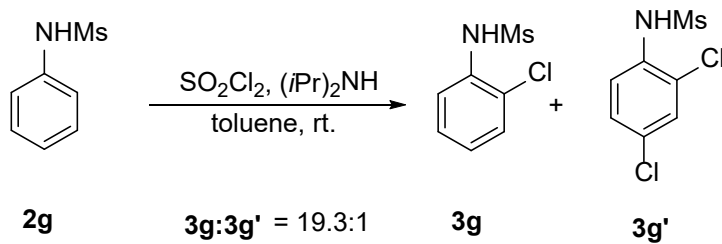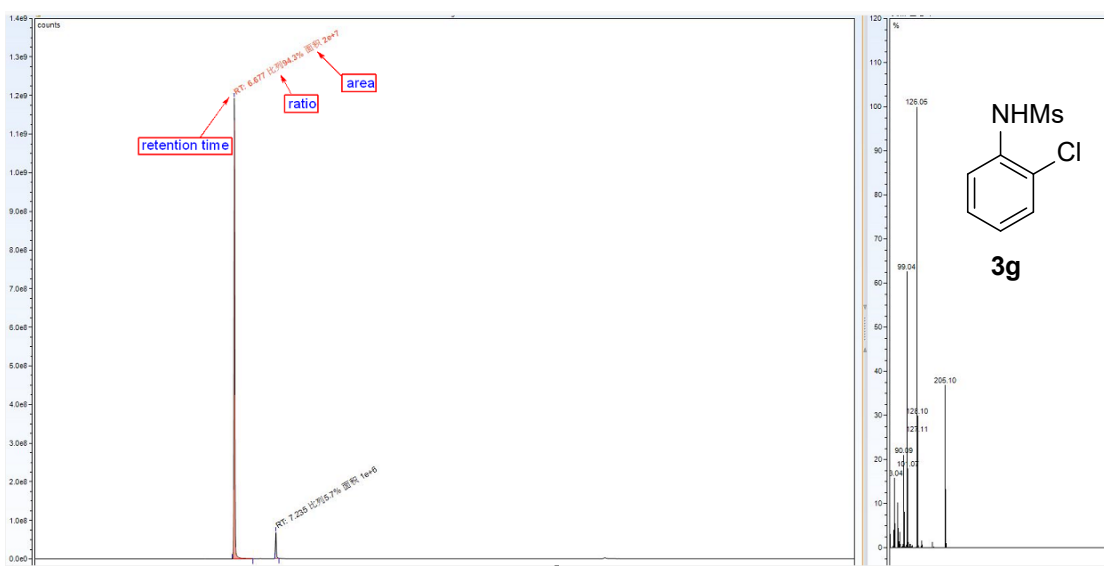

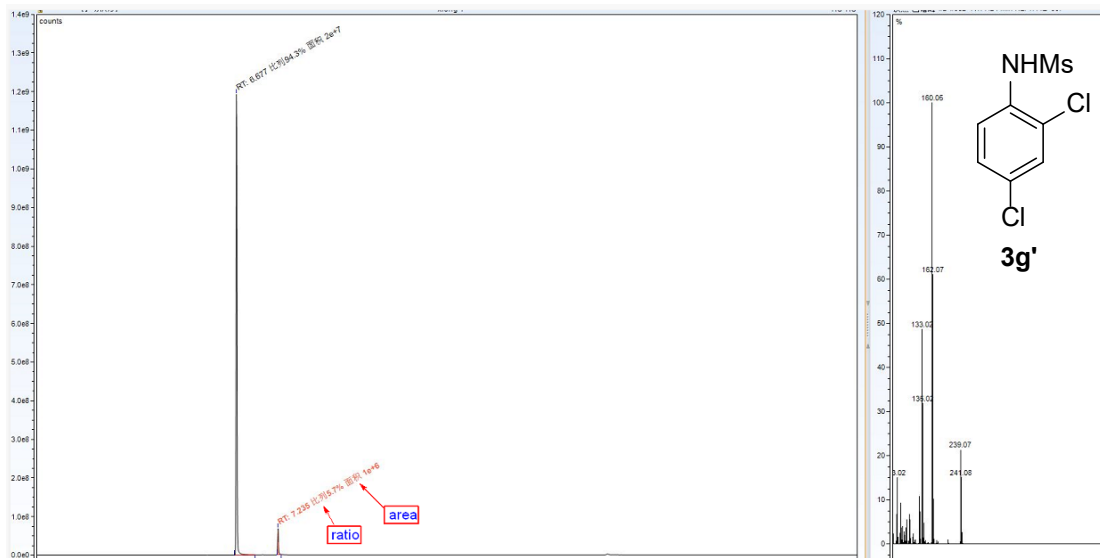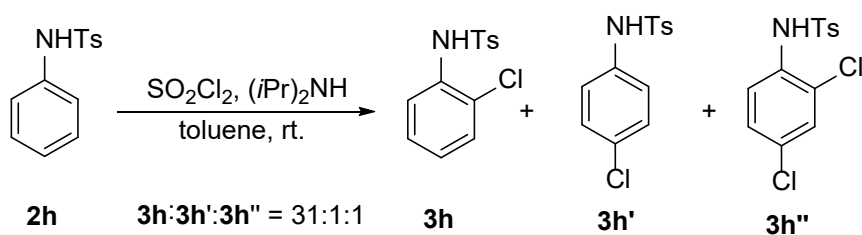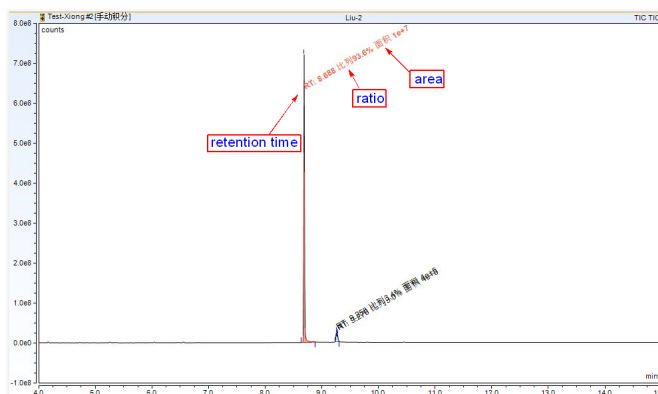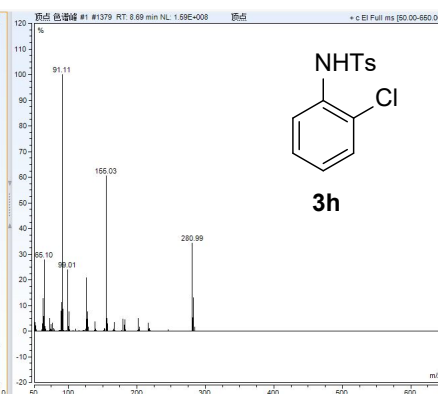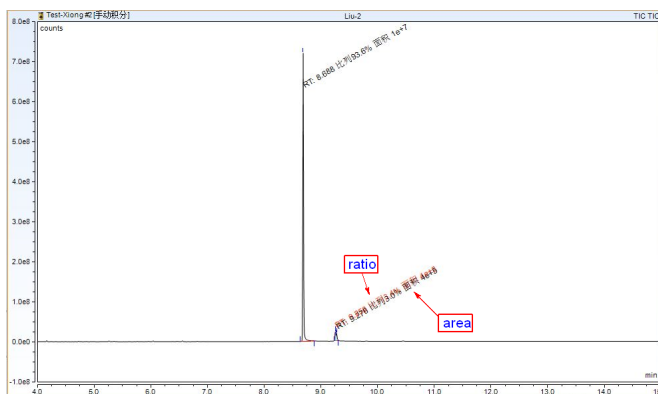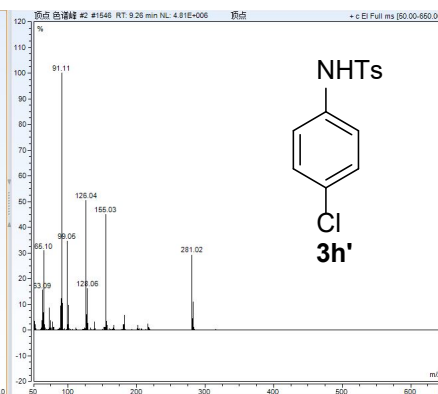

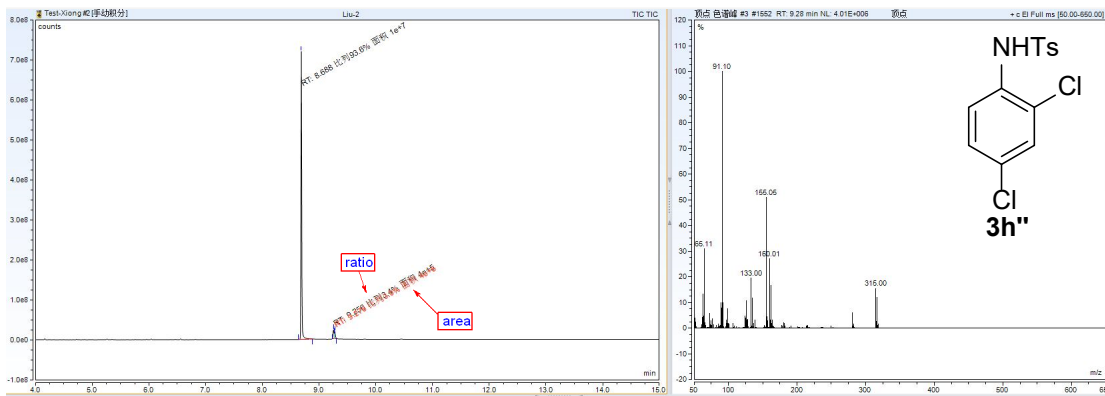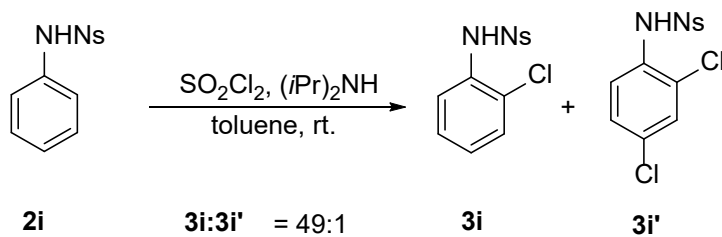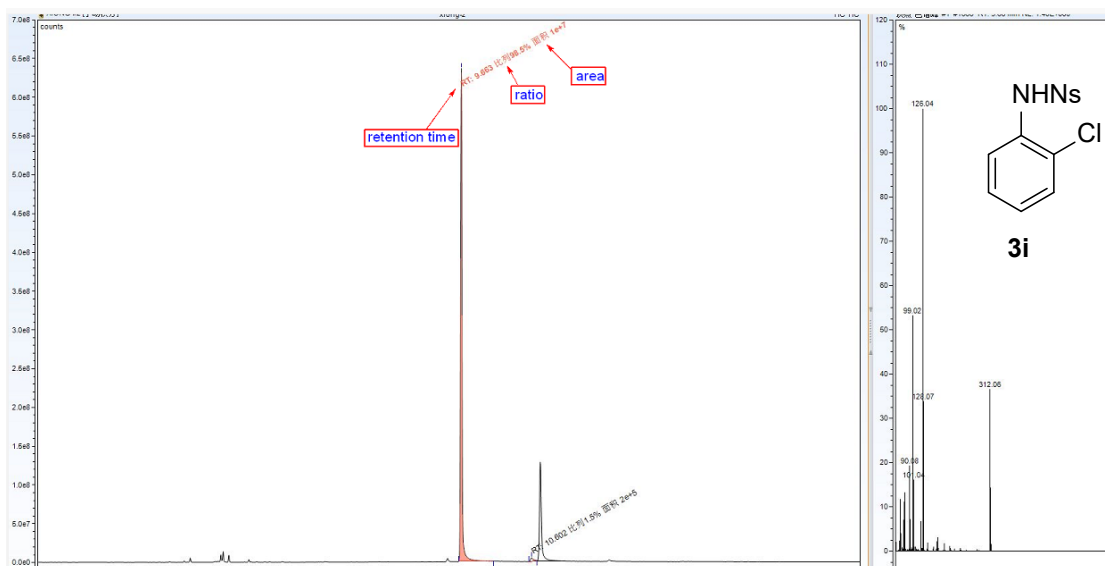

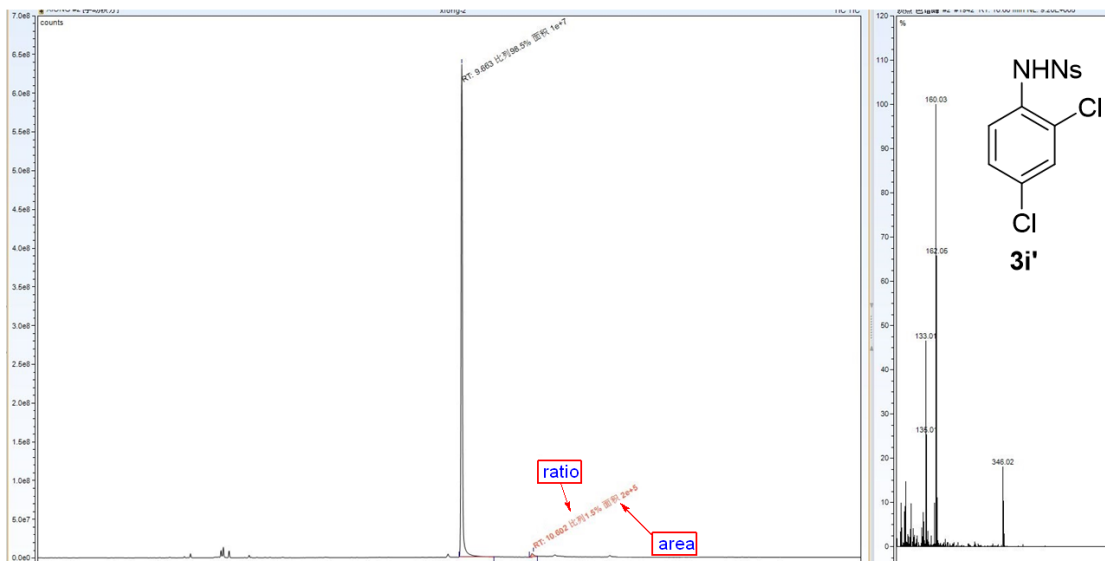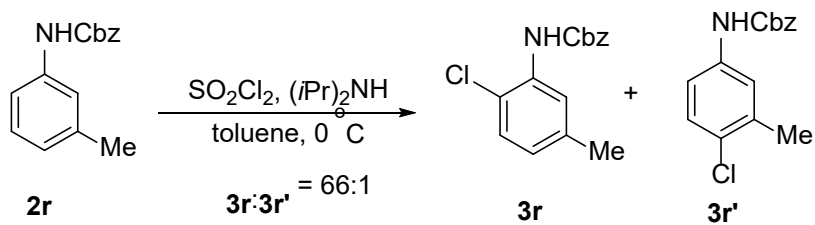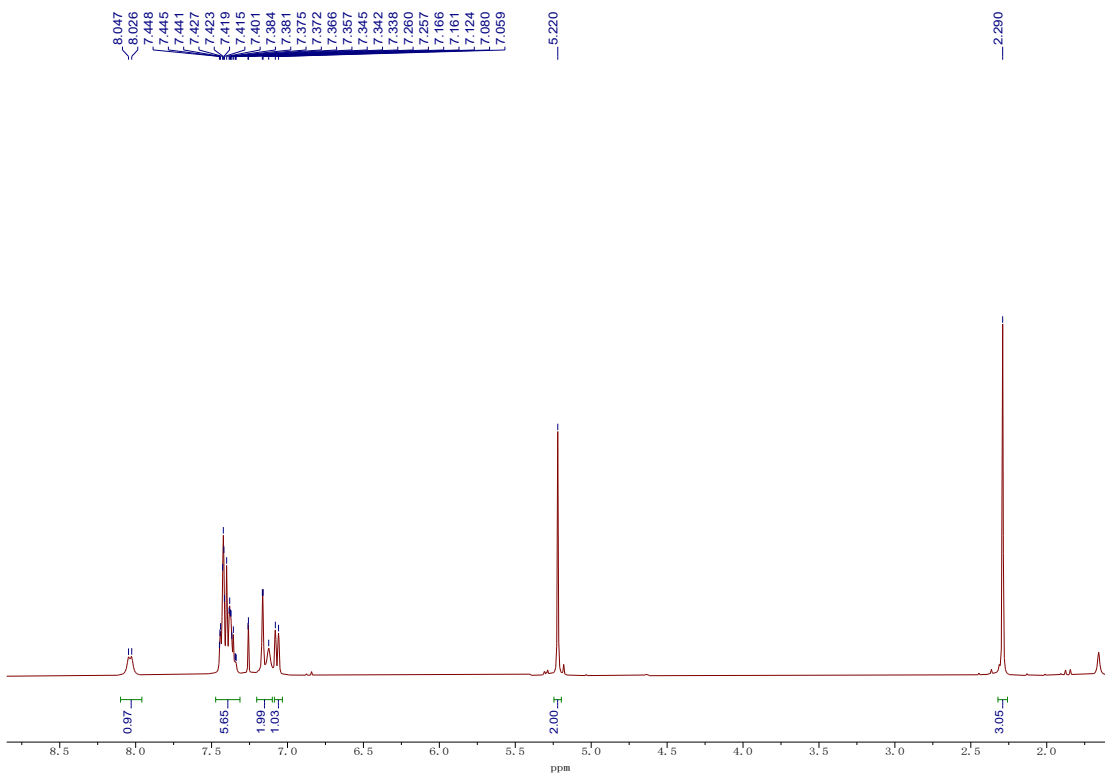

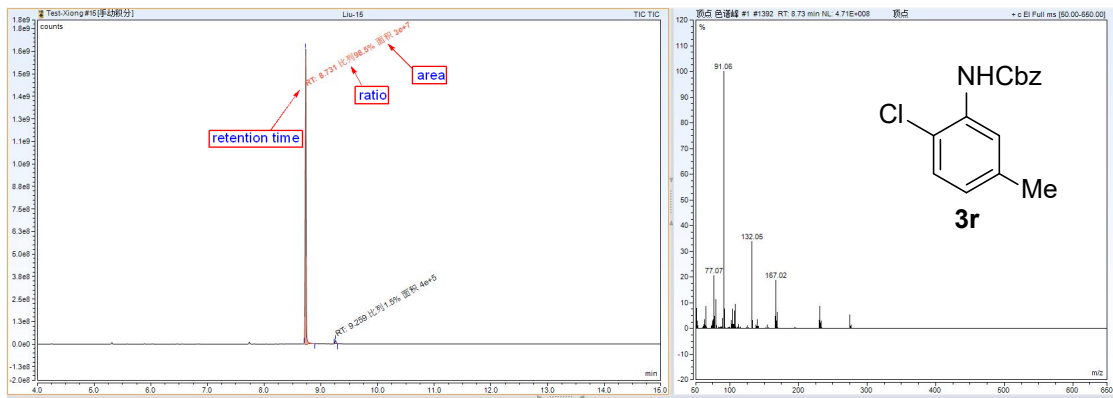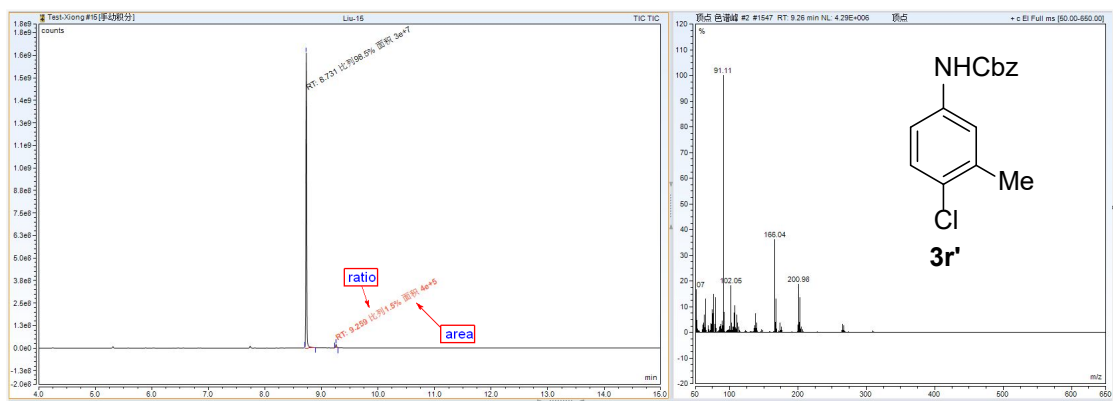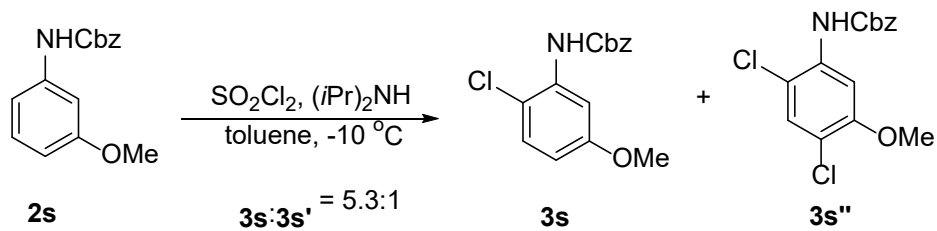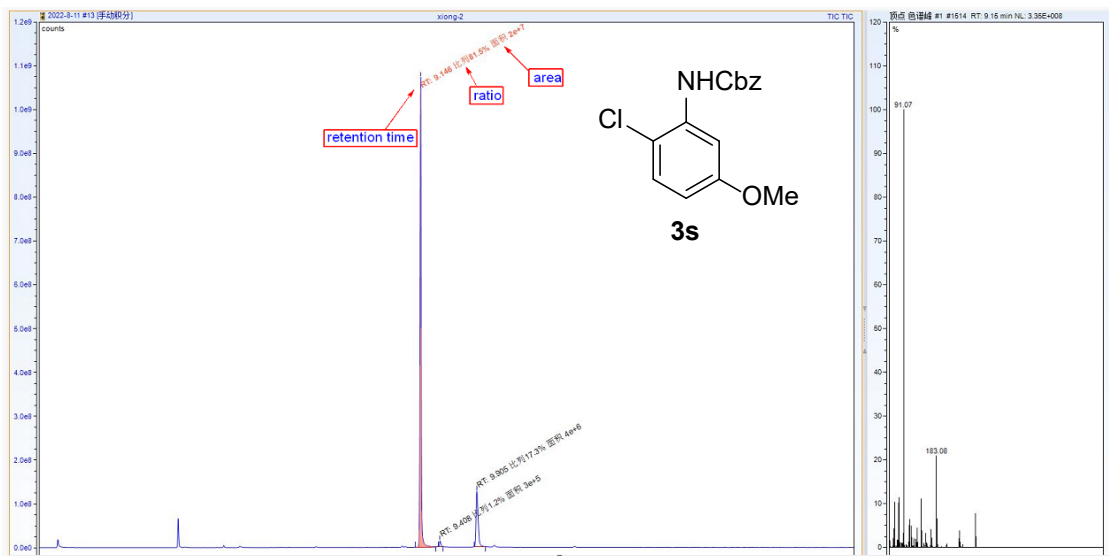

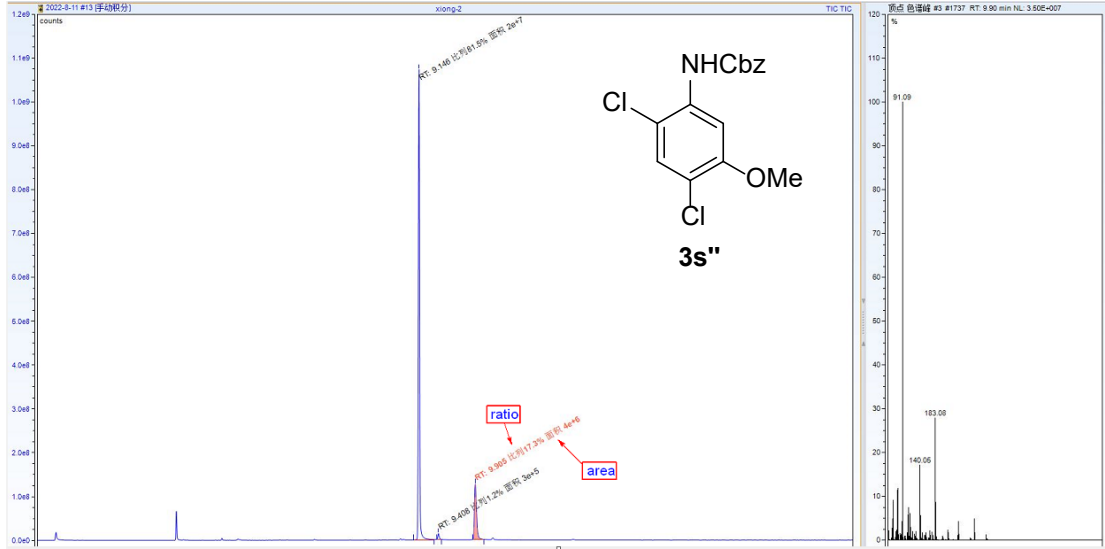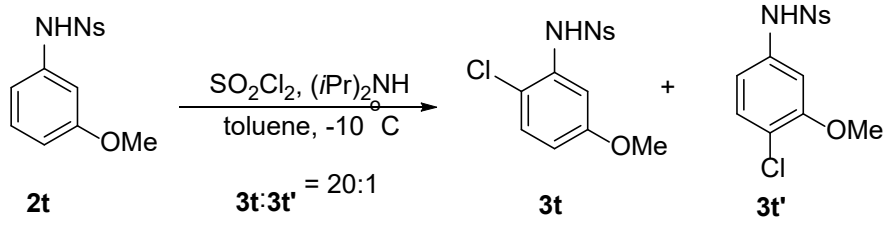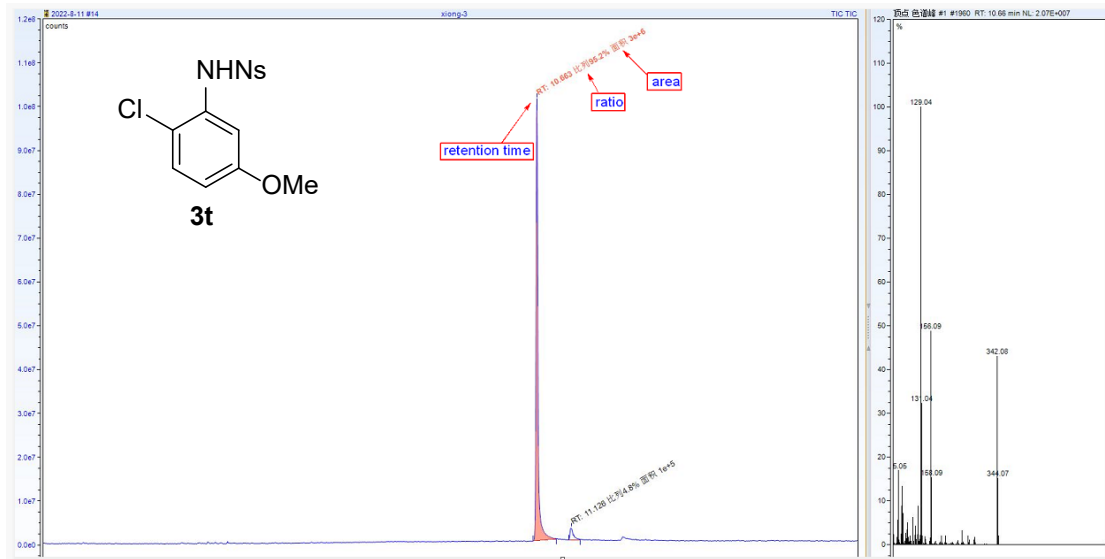

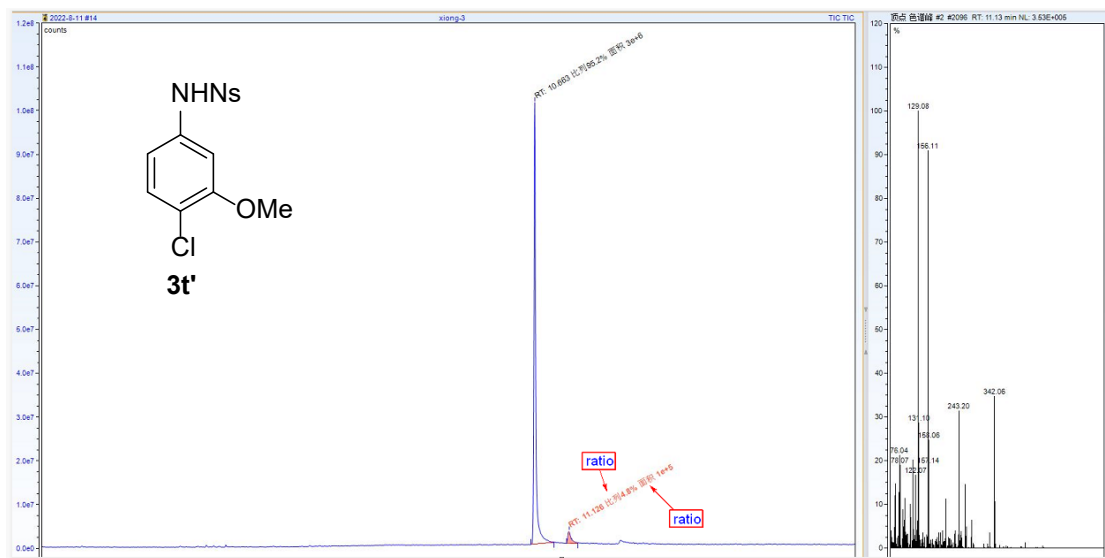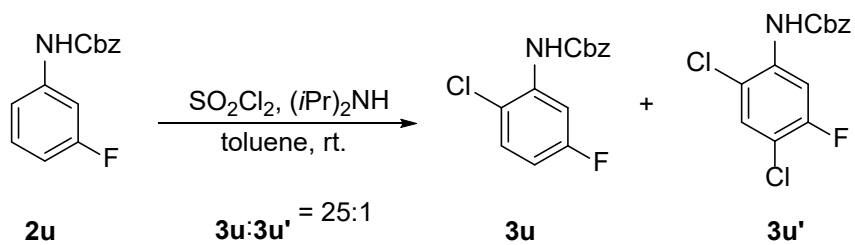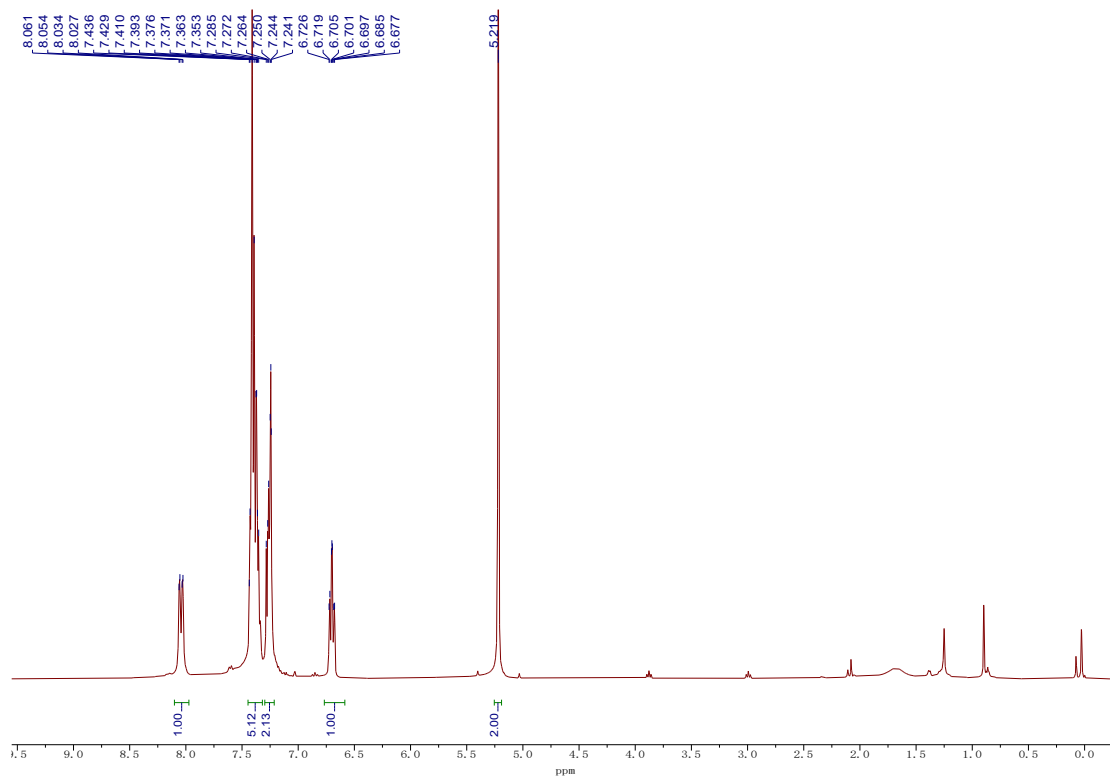



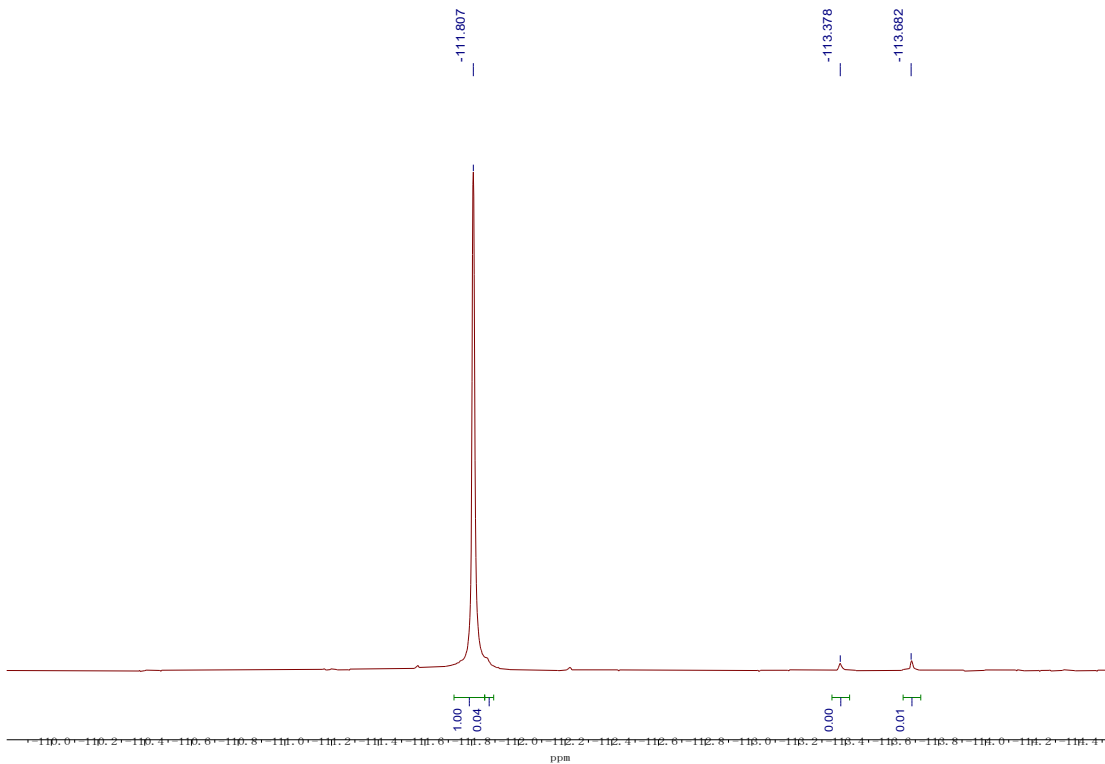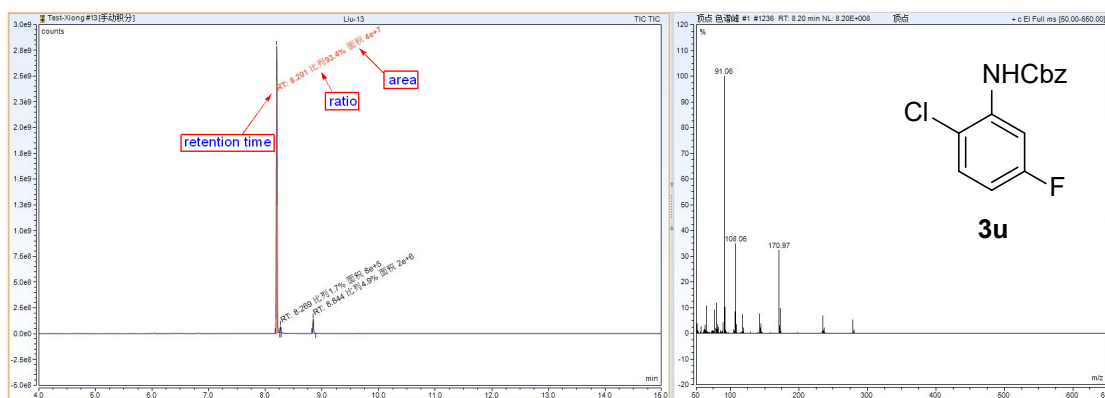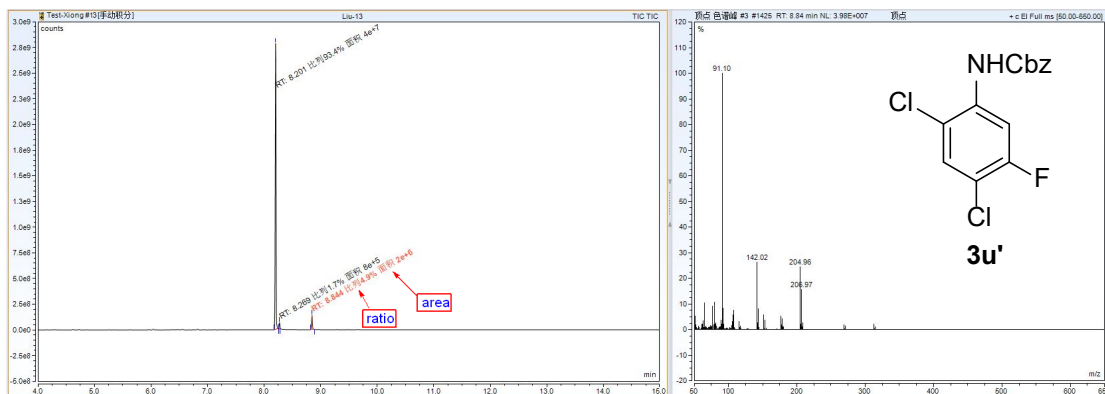

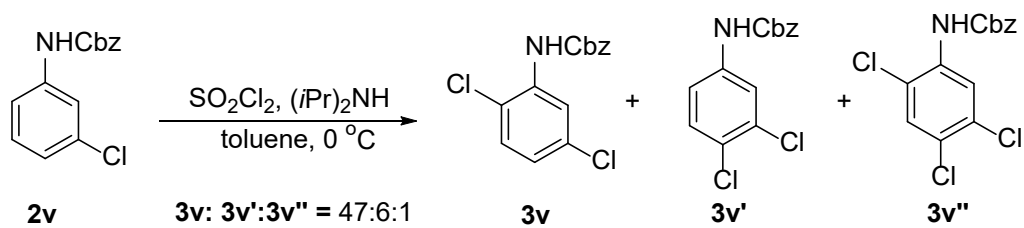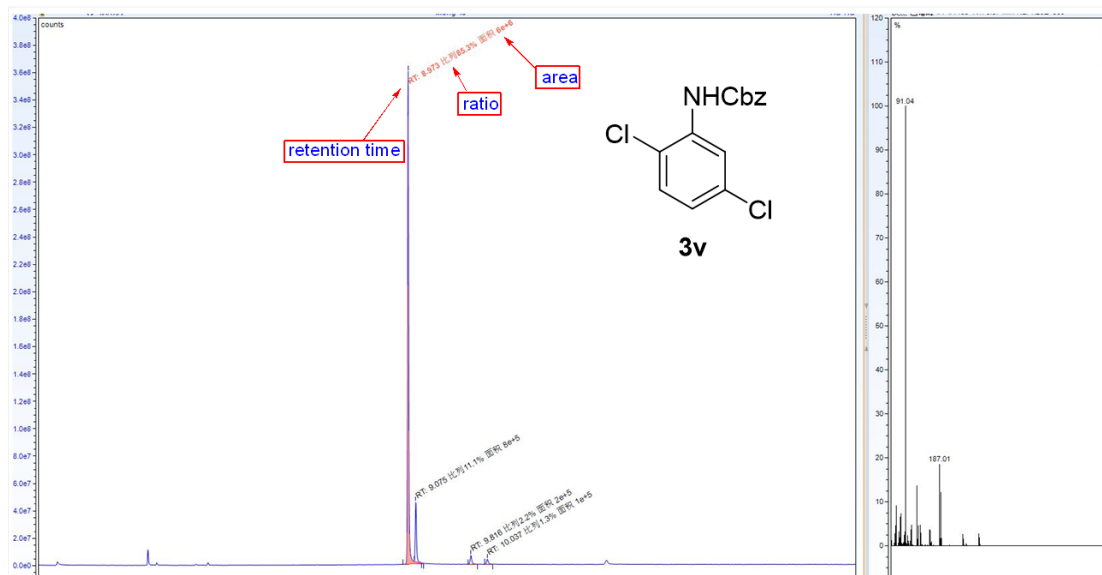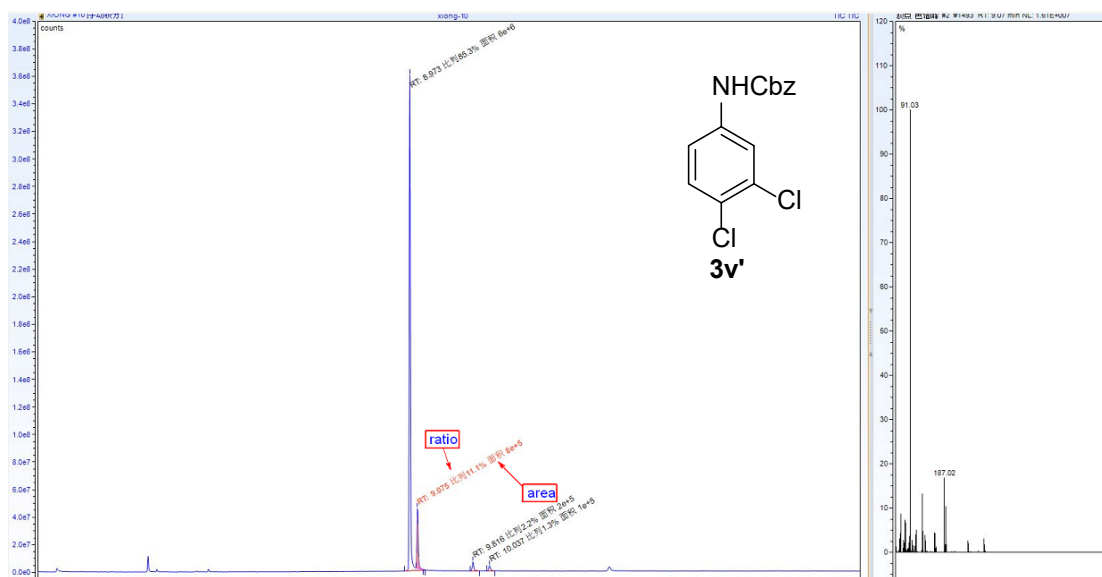

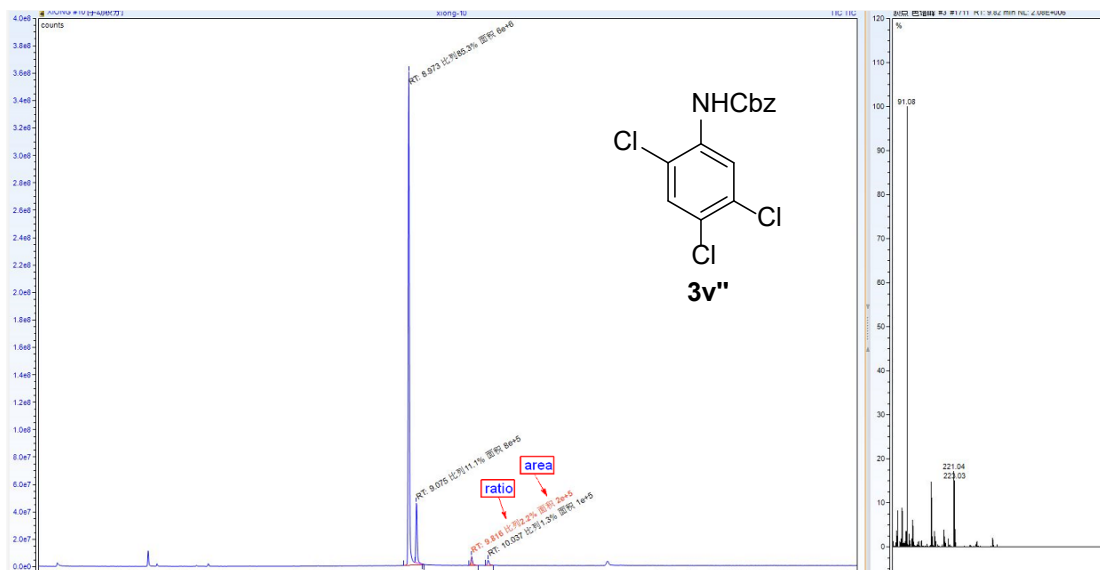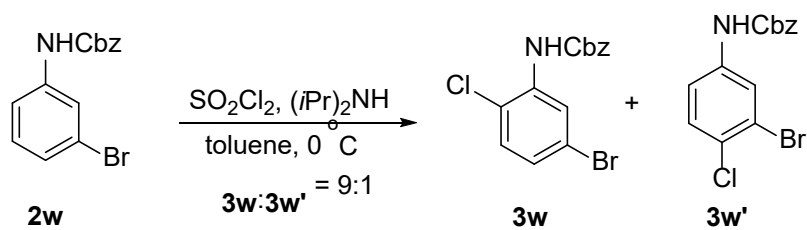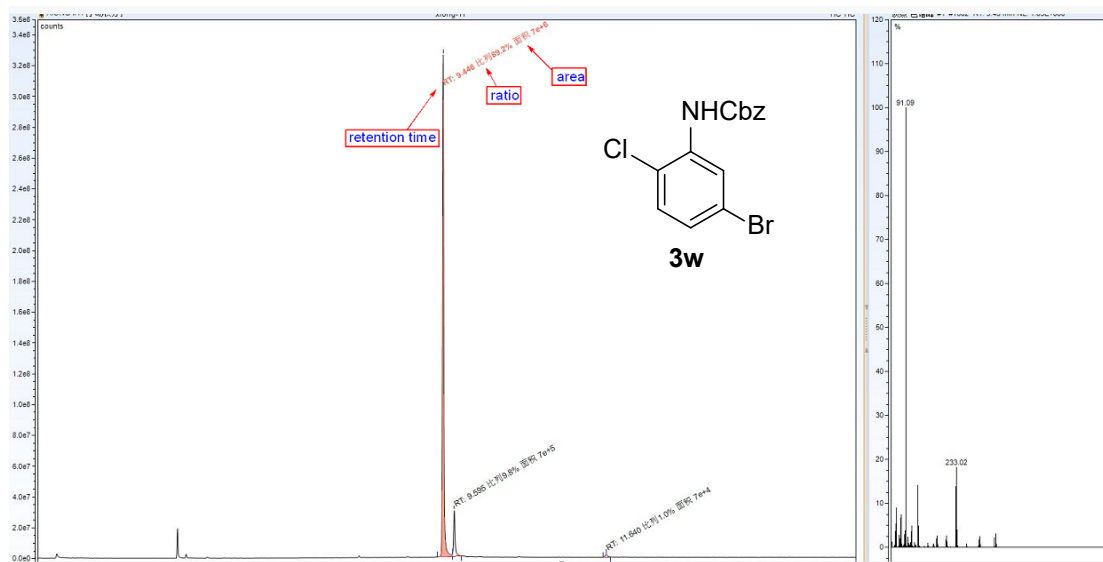

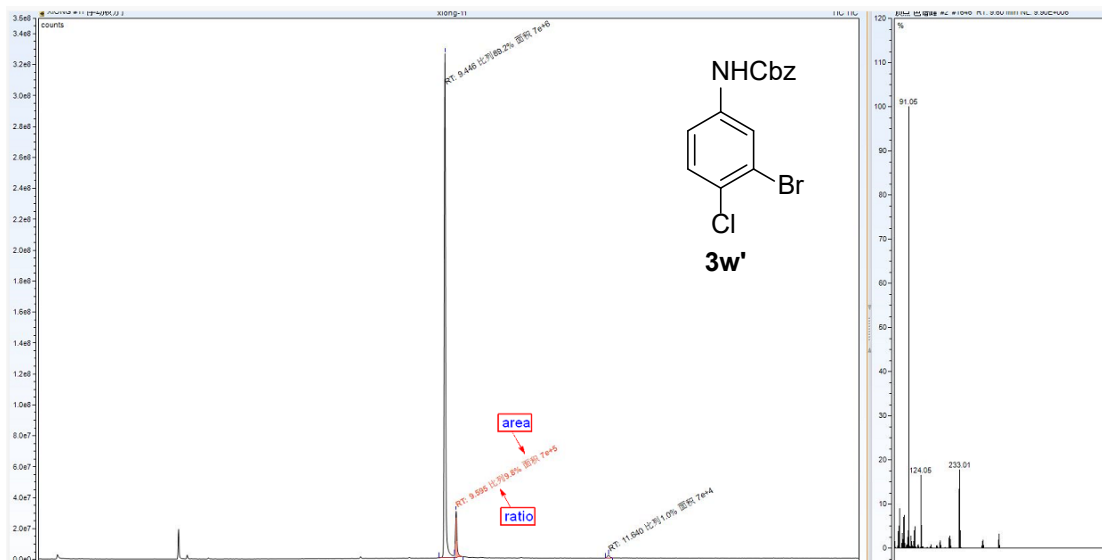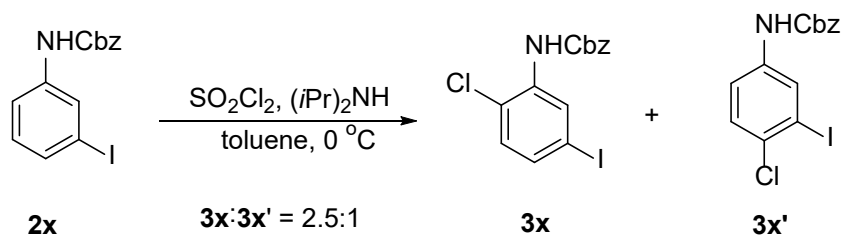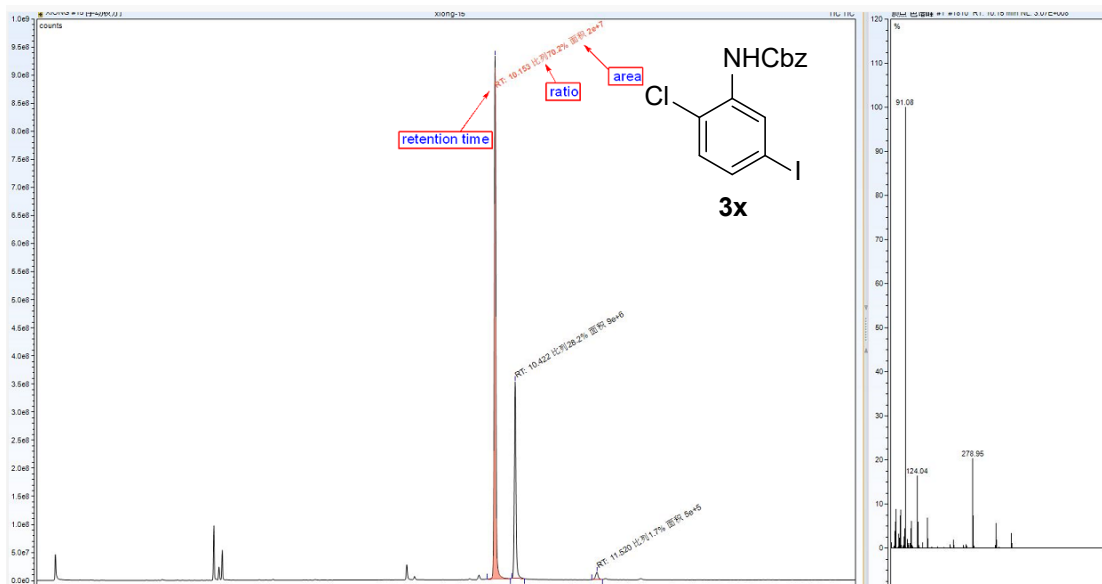

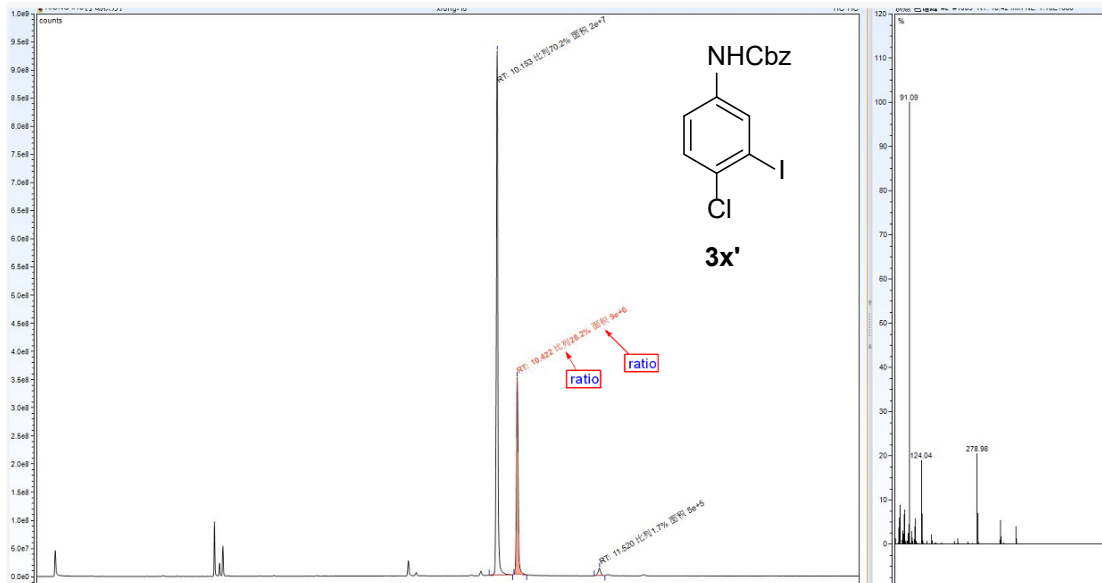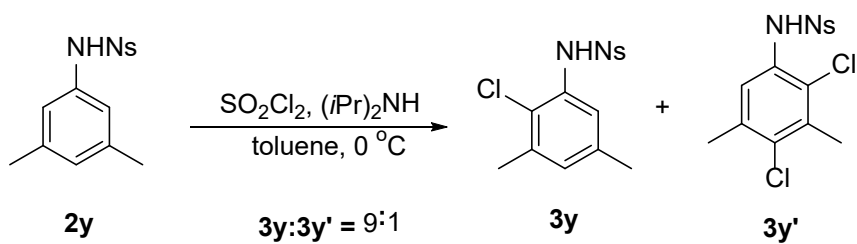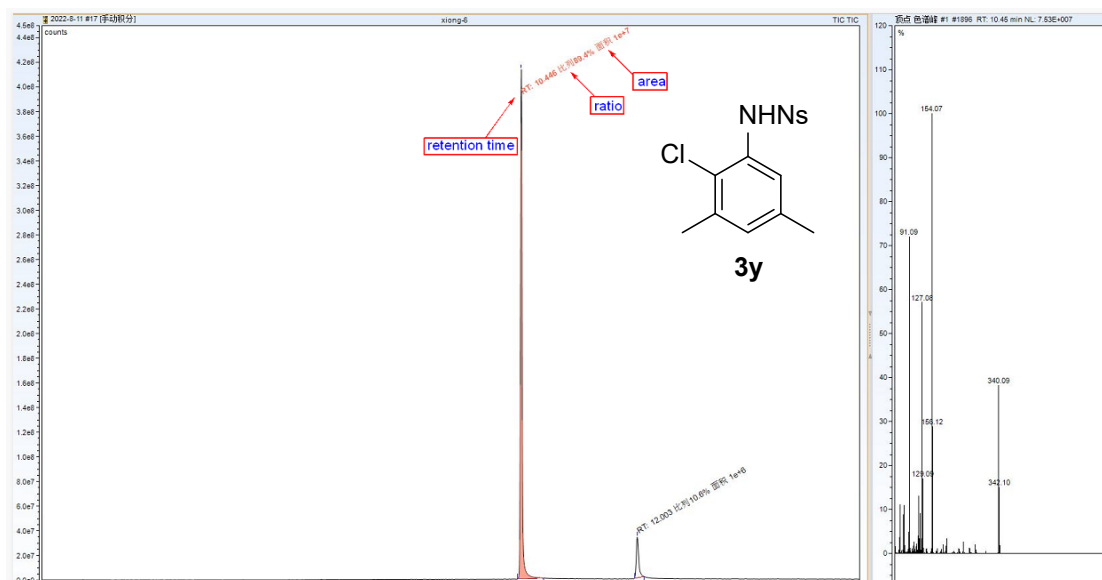

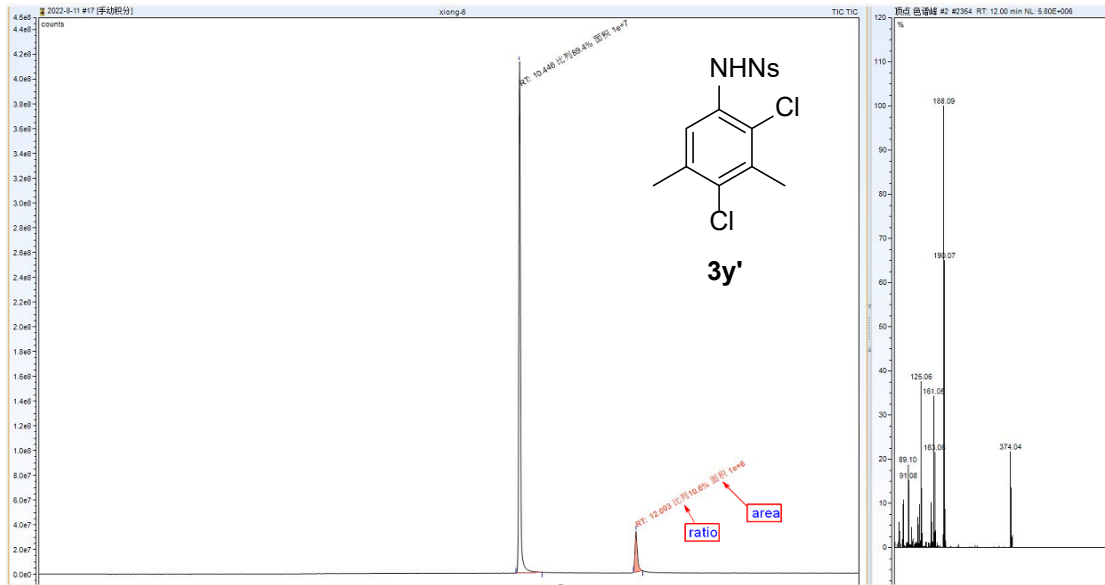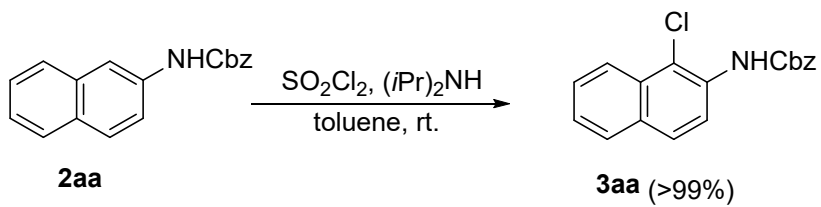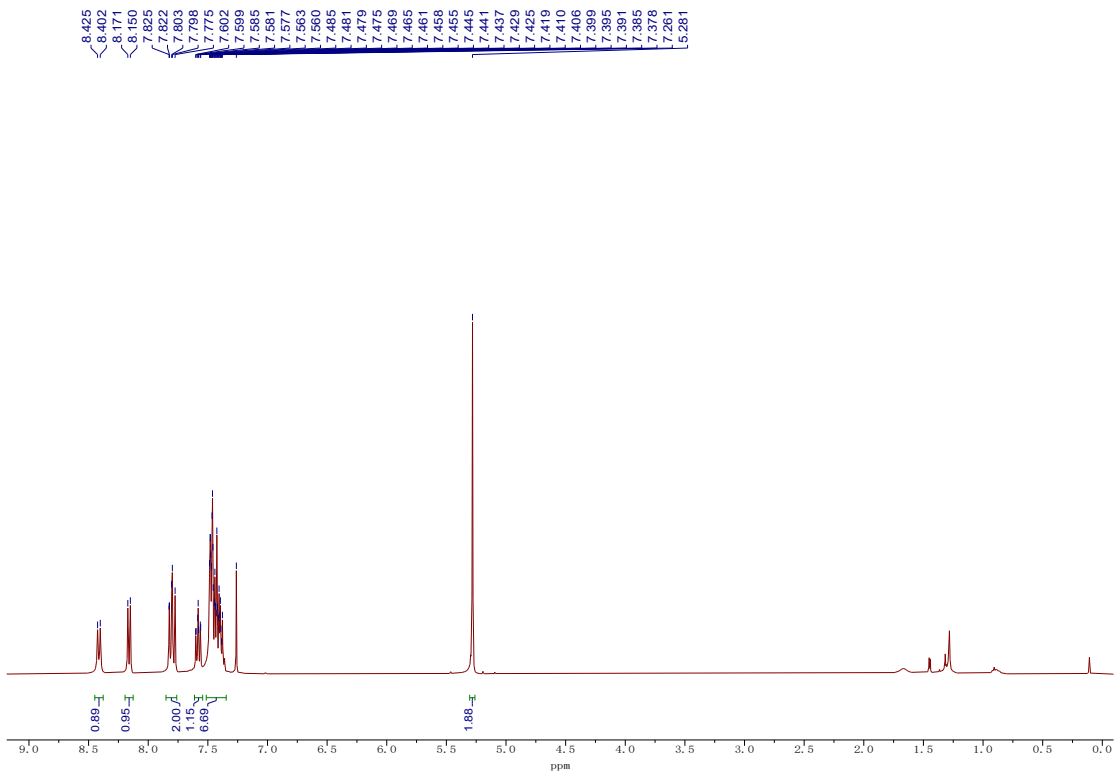

## Mechanistic study:

### (I) Preparation for species E

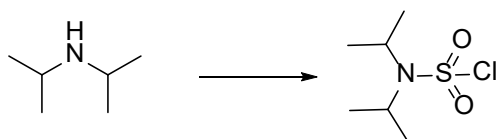

A solution of dry diisopropylamine (2.9 mL, 20 mmol) in dry Et<sub>2</sub>O (10 mL) was added dropwise to a stirred solution of sulfonyl chloride (0.81 mL, 10 mmol) and Et<sub>3</sub>N (2.5 mL, 20 mmol) in Et<sub>2</sub>O (20 mL) at -10 °C under N<sub>2</sub>. After 2 h, the reaction mixture was diluted with Et<sub>2</sub>O (10 mL) and vacuum-filtered through Celite. The filtrate was evaporated to give **E** as a yellow oil (0.59 g, 30%). <sup>1</sup>H NMR (400 MHz, CDCl<sub>3</sub>) δ 1.39 (d, *J* = 8.0 Hz, 12H), 3.96-4.06 (m, 2H); <sup>13</sup>C NMR (100 MHz, CDCl<sub>3</sub>) δ 51.8, 20.6.

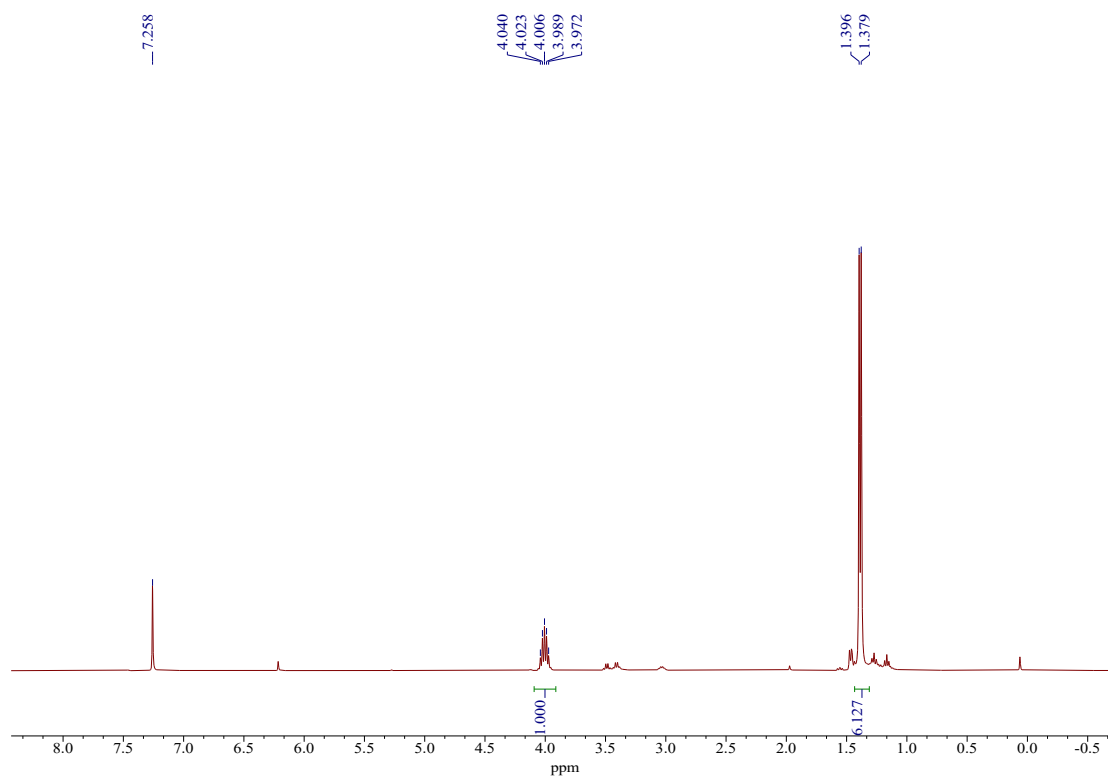

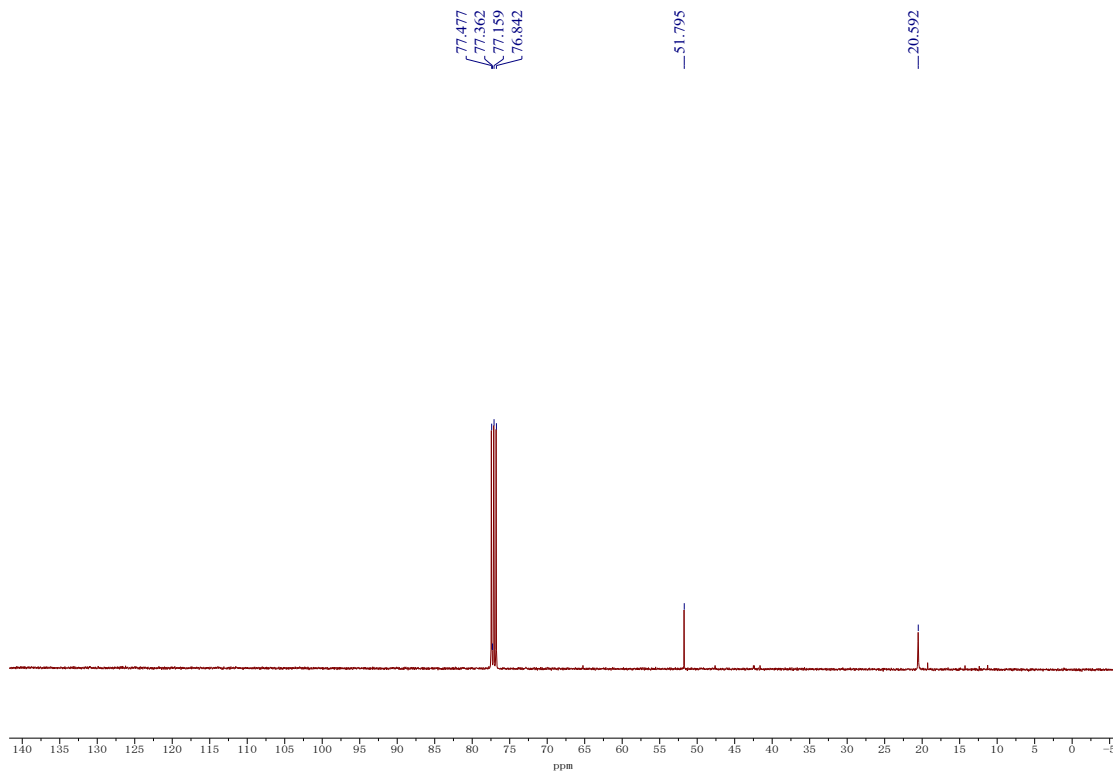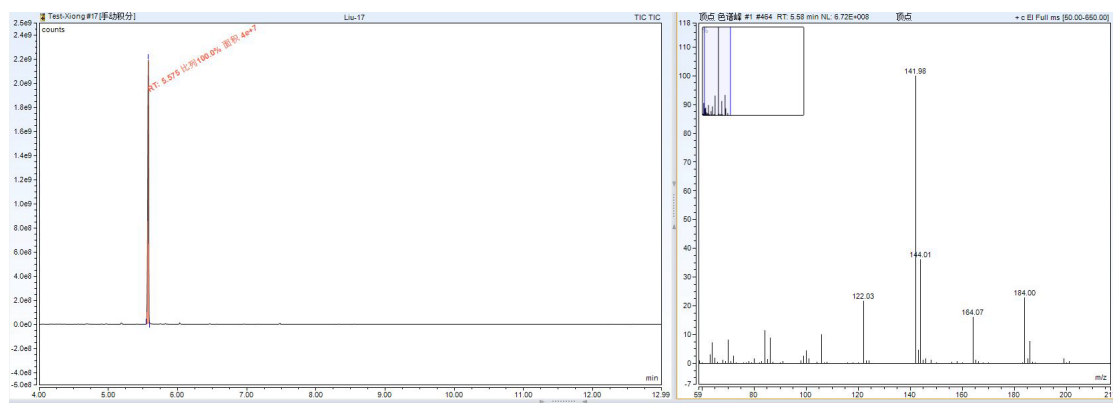



### (J) Species E as halogen source and catalyst for *ortho*-chlorination

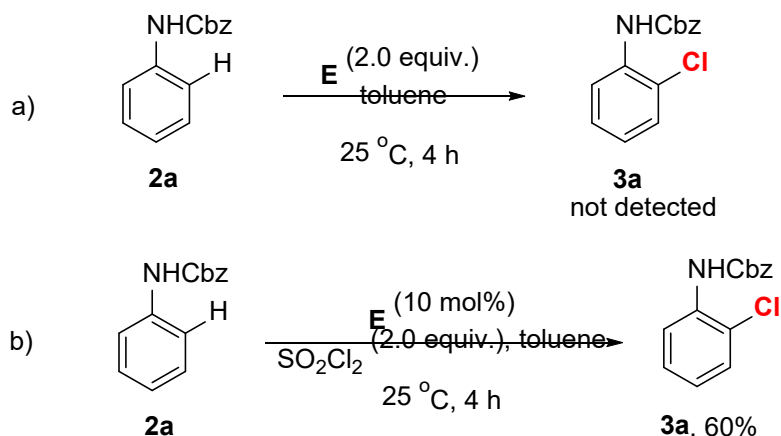

Notes: The *ortho*-chlorination of **2a** was carried out using species **E** as chlorinating reagent at room temperature, *ortho*-chlorinated product **3a** was not detected.

However, the *ortho*-chlorination of **2a** worked in the presence of species **E** and sulfonyl chloride, providing the desired product **3a** in 60% yield.

### (K) Mioskowski reagent as halogen source for *ortho*-chlorination

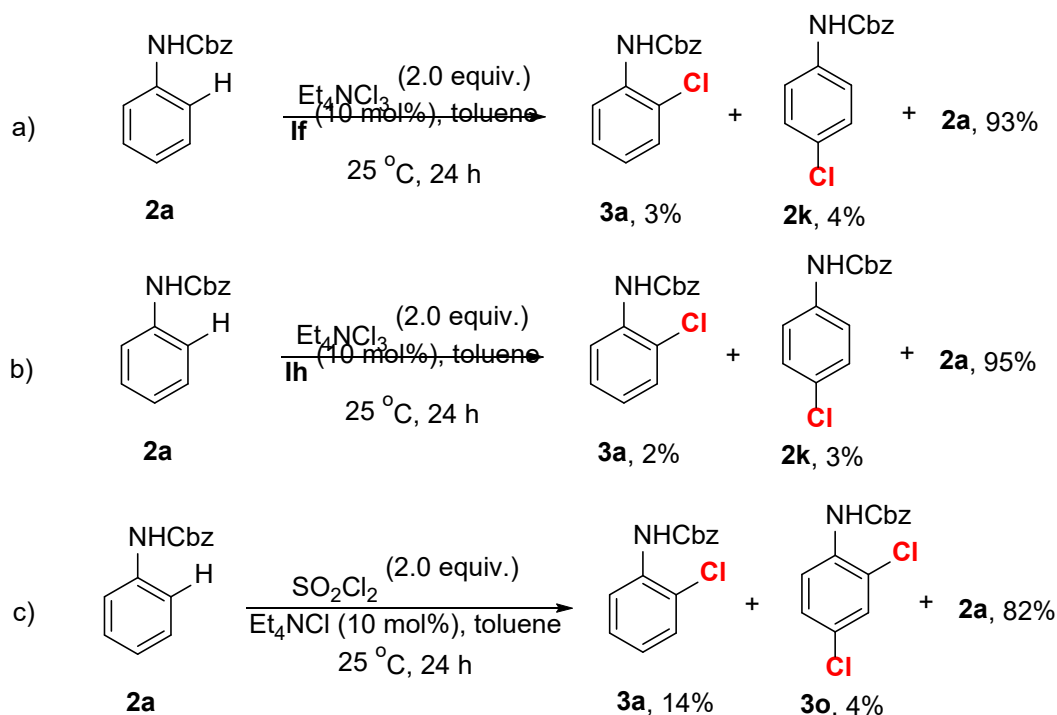

Notes: The *ortho*-chlorination of **2a** was carried out using Mioskowski reagent as chlorinating reagent at room temperature in the presence of **1f** and **1h**, providing the desired product **3a** in 3% yield and 2% yield, respectively. These results indicated that the larger tetraethylammonium cation could provide stable environment for allowing the anion  $Cl_3^-$  to approach in lowest energy form, whereas the smaller cations offer the unstable conditions.

See (a) Evans, J. C.; Lo, Y.-S. Vibrational Spectra of the  $\text{Cl}_3^-$  Ion and Evidence for the Existence of  $\text{Cl}_5^-$ . *J. Chem. Phys.* **1966**, 44, 3638–3639. (b) Daniel, F.; Hoyle, G. Perhalides of Quaternary Ammonium Salts. *J. Chem. Soc. Trans.* **1923**, 123, 654–662.

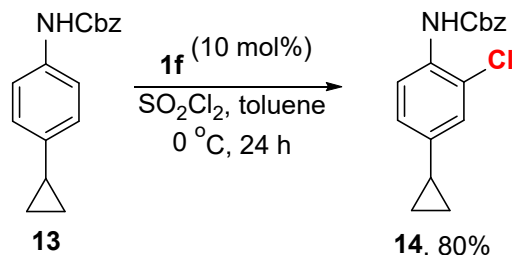

Notes: The chlorination of cyclopropane **13** provides the corresponding ortho-chlorinated compound **14** in 80% yield, and the product with cyclopropane opened was not observed. This result further suggests the involvement of radical pathway was impossible.

**(L) Determine the species A**

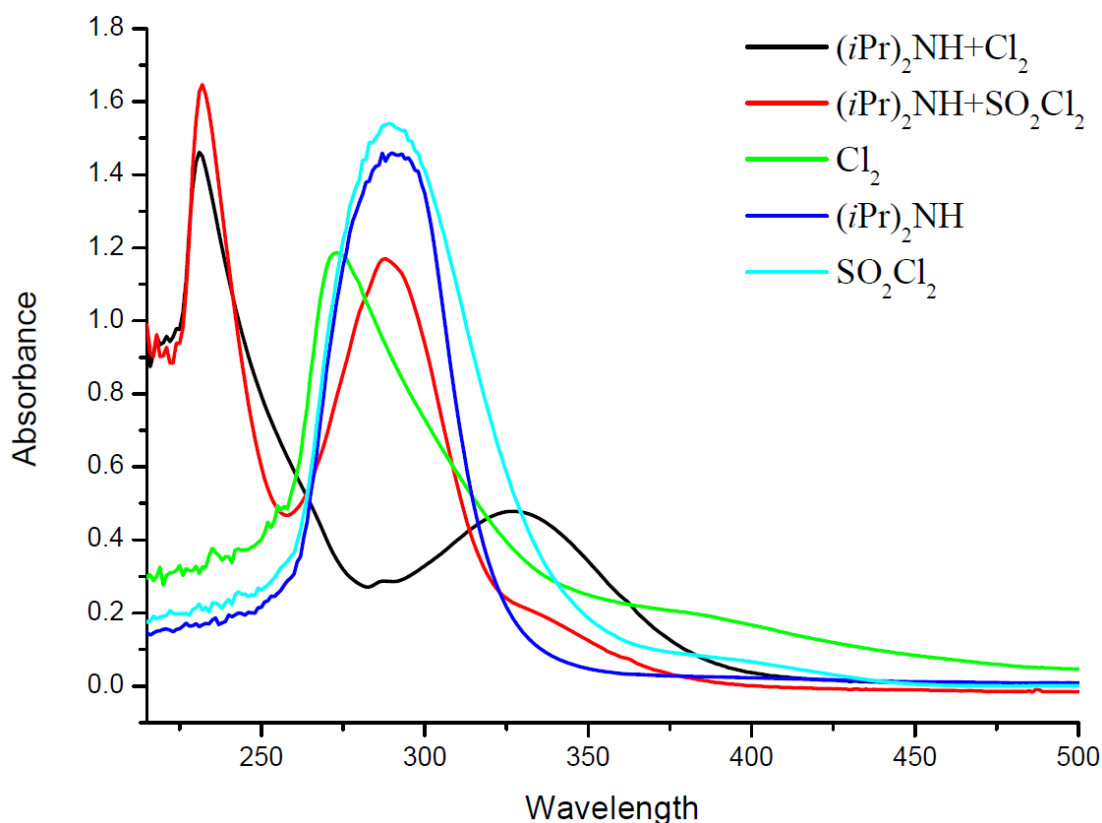

Notes: The UV-vis experiment was conducted using **1f** (0.1 eq.) and  $\text{SO}_2\text{Cl}_2$  (1.0 eq.) in  $\text{CH}_2\text{Cl}_2$  at 25 °C. The new signal could be attributed to the strong intense absorption of the species **A** at 232 nm.

**Figure S1.** UV-vis experiment studies

See (a) Brown, D. M.; Dainton, F. S. Matrix Isolation of Unstable Halogen Radical Ions. *Nature* **1966**, 209, 195–196. (b) Andrews, L. Optical Spectra of the Difluoride, Dichloride, and Trichloride Ions in the Matrix-Isolated  $\text{M}^+\text{F}_2^-$ ,  $\text{M}^+\text{Cl}_2^-$ , and  $\text{M}^+\text{Cl}_3^-$  Species. *J. Am. Chem. Soc.* **1976**, 98, 2147–2152.

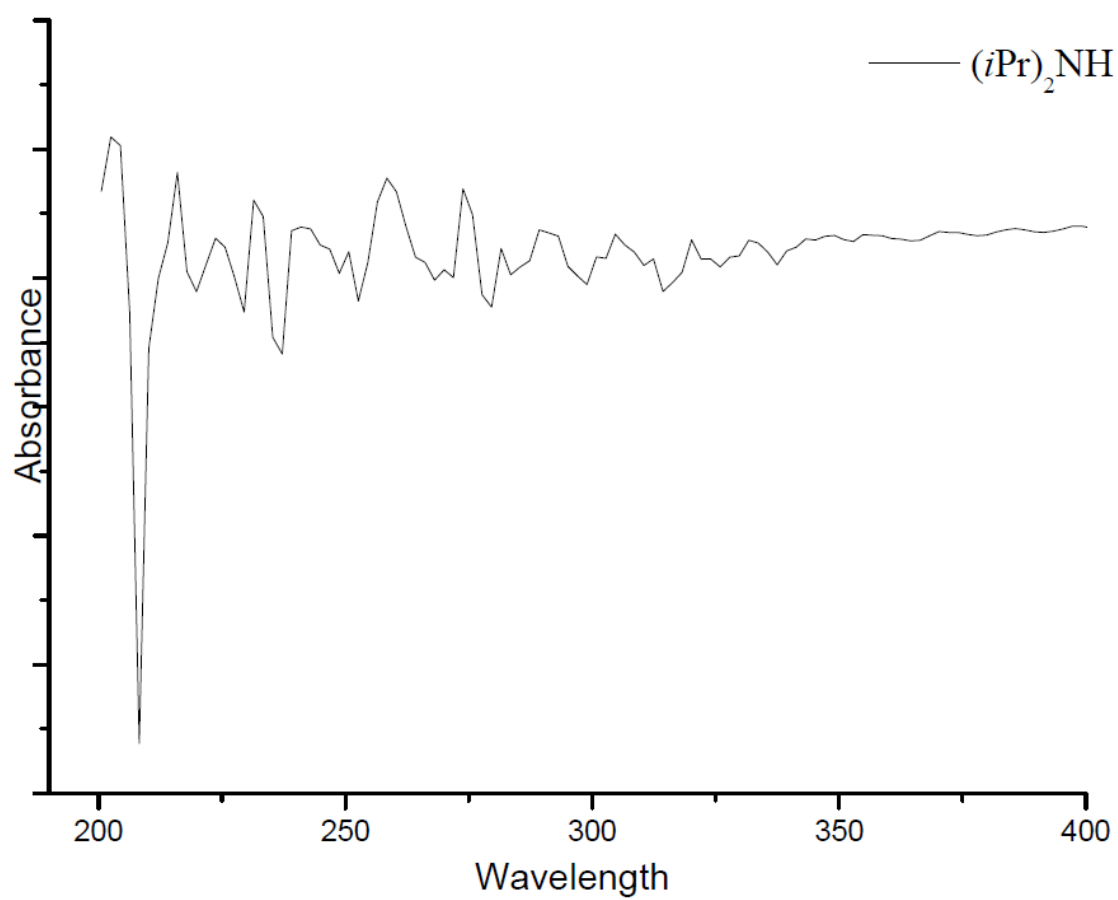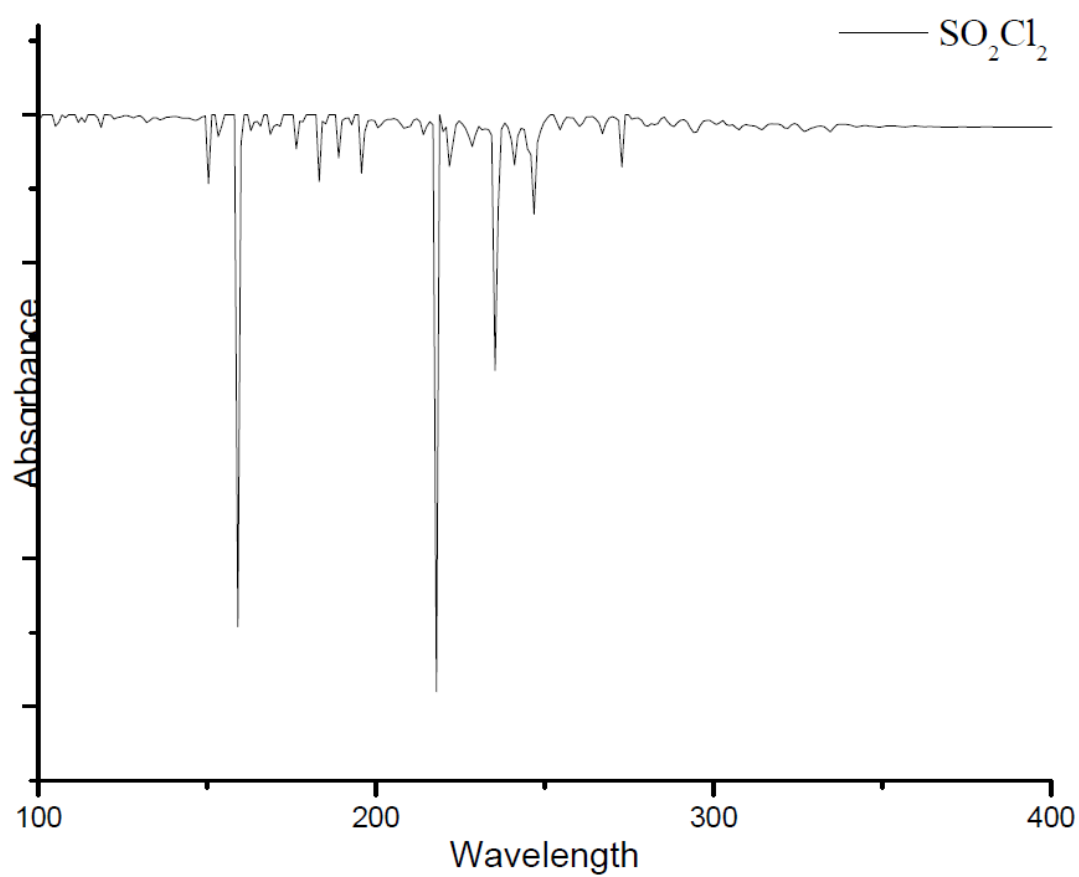

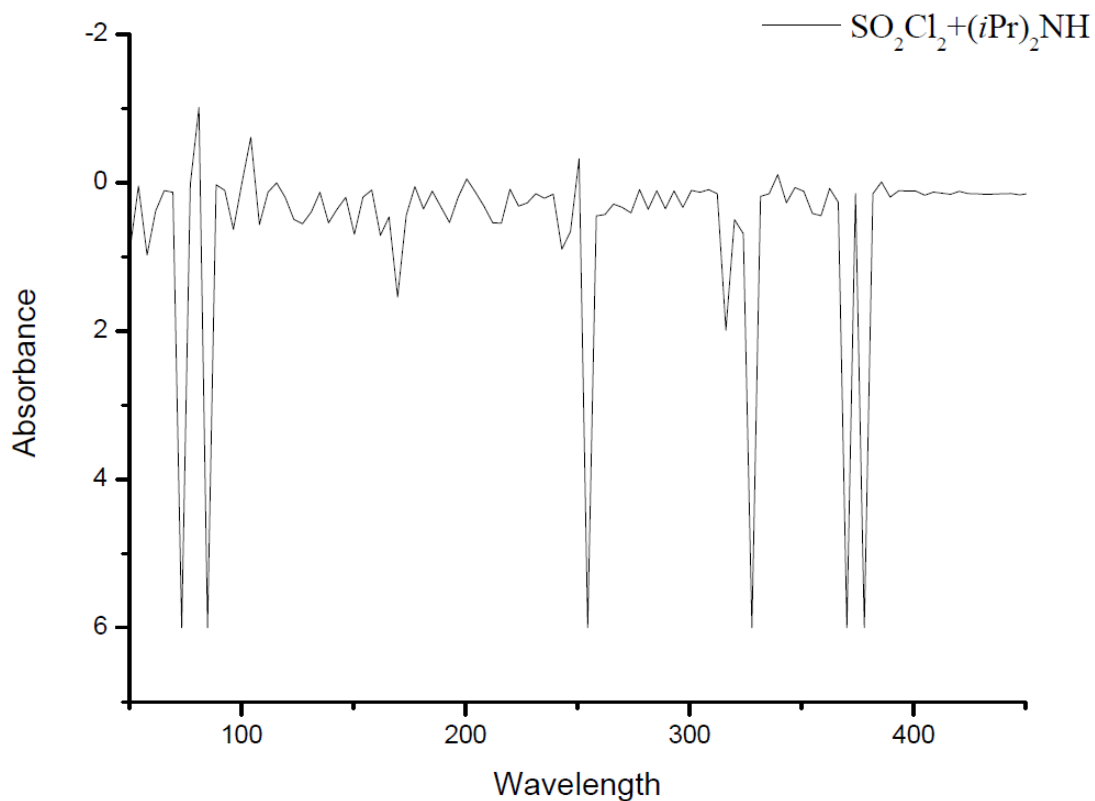

Notes: **If** (0.1 eq.) and  $\text{SO}_2\text{Cl}_2$  (1.0 eq.) were solved in  $\text{CH}_2\text{Cl}_2$  at 25 °C, then the solvent was removed to afford white solid, which was used to conduct the IR experiment. The new signal could be attributed to the sharp band of the species **A** at  $254\text{ cm}^{-1}$ .

**Figure S2.** IR experiment studies

See (a) Evans, J. C.; Lo, G. Y-S. Vibrational Spectra of the  $\text{Cl}_3^-$  Ion and Evidence for the Existence of  $\text{Cl}_5^-$ . *J. Chem. Phys.* **1966**, *44*, 3638–3639. (b) Redeker, F. A.; Riedel, S. Matrix-isolation and comparative far-IR investigation of free linear  $[\text{Cl}_3]^-$  and a series of alkali trichlorides. *Chem. Commun.* **2017**, *53*, 12958–12961.

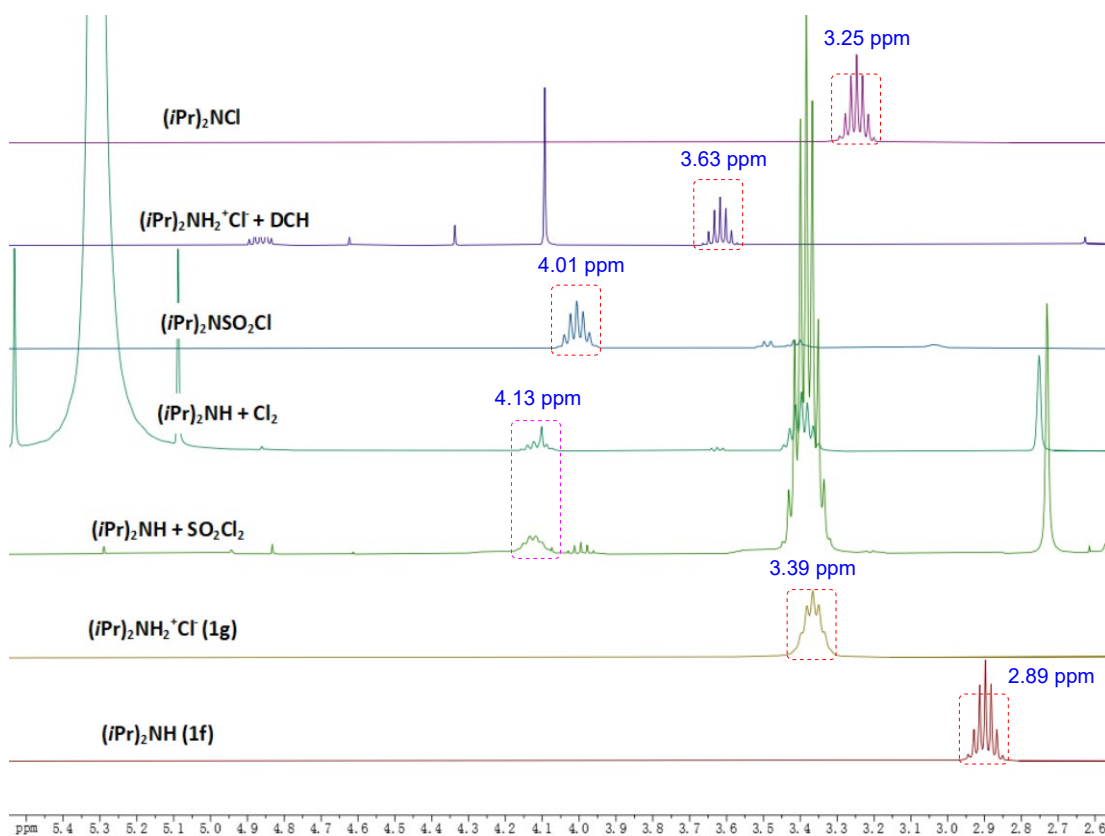

Notes: The NMR experiment was conducted using **1f** (0.1 eq.) and  $\text{SO}_2\text{Cl}_2$  (1.0 eq.) in  $\text{CDCl}_3$  at 25 °C. The signal of the methine proton of **1g** (3.4 ppm) and a new signal (4.1 ppm) appeared concurrently. The new signal could be attributed to the methine proton of the species **A**.

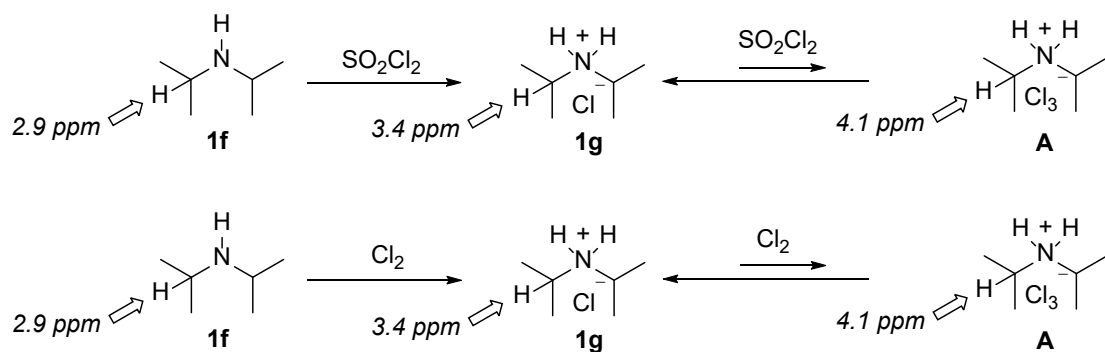

**Figure S3.**  $^1\text{H}$  NMR experiment on a mixture of **1f** and  $\text{SO}_2\text{Cl}_2$  in  $\text{CDCl}_3$

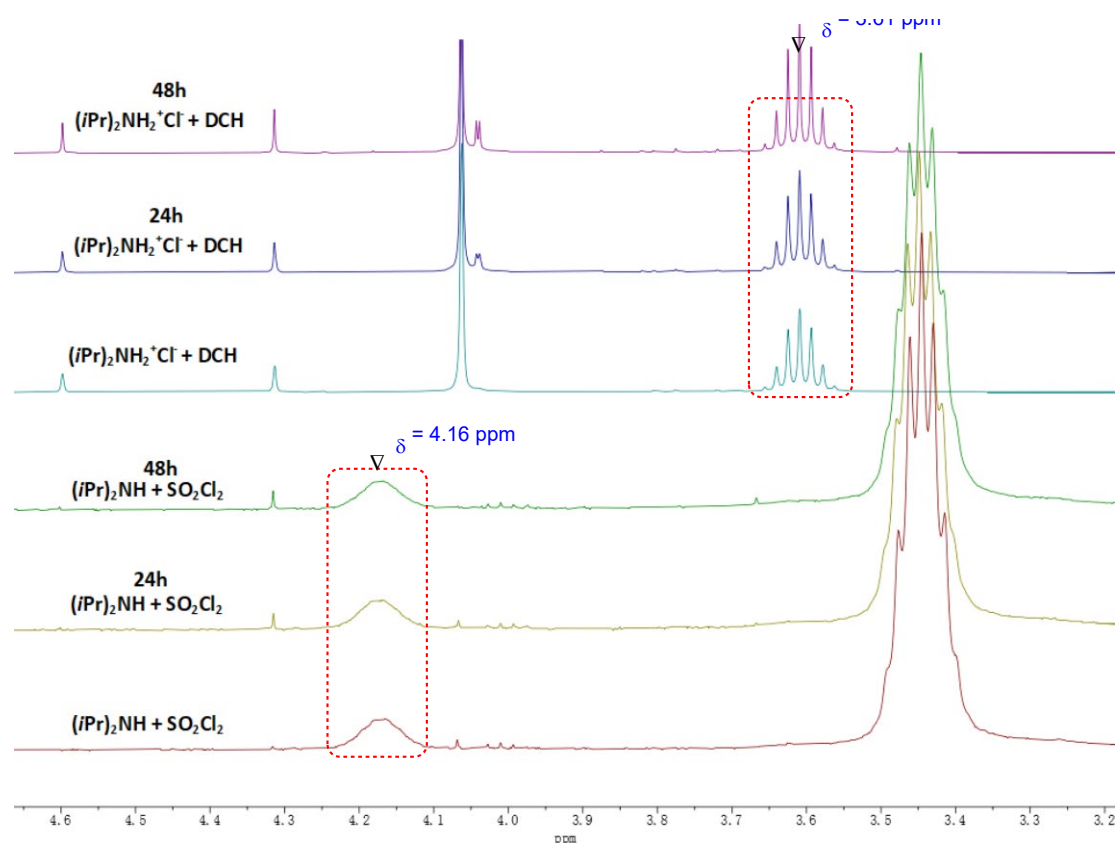

Notes: The NMR experiments were conducted using **1f** (0.1 eq.) and SO<sub>2</sub>Cl<sub>2</sub> (1.0 eq.), **1h** (0.1 eq.) and DCH (1.0 eq.) in CDCl<sub>3</sub> at 25 °C. These results suggested that the species **A** (4.1 ppm) and the active cationic species (3.6 ppm) were stable at 25 °C.

**Figure S4.** <sup>1</sup>H NMR experiment on a mixture of **1f** and SO<sub>2</sub>Cl<sub>2</sub>, **1h** and DCH in CDCl<sub>3</sub> at 25 °C

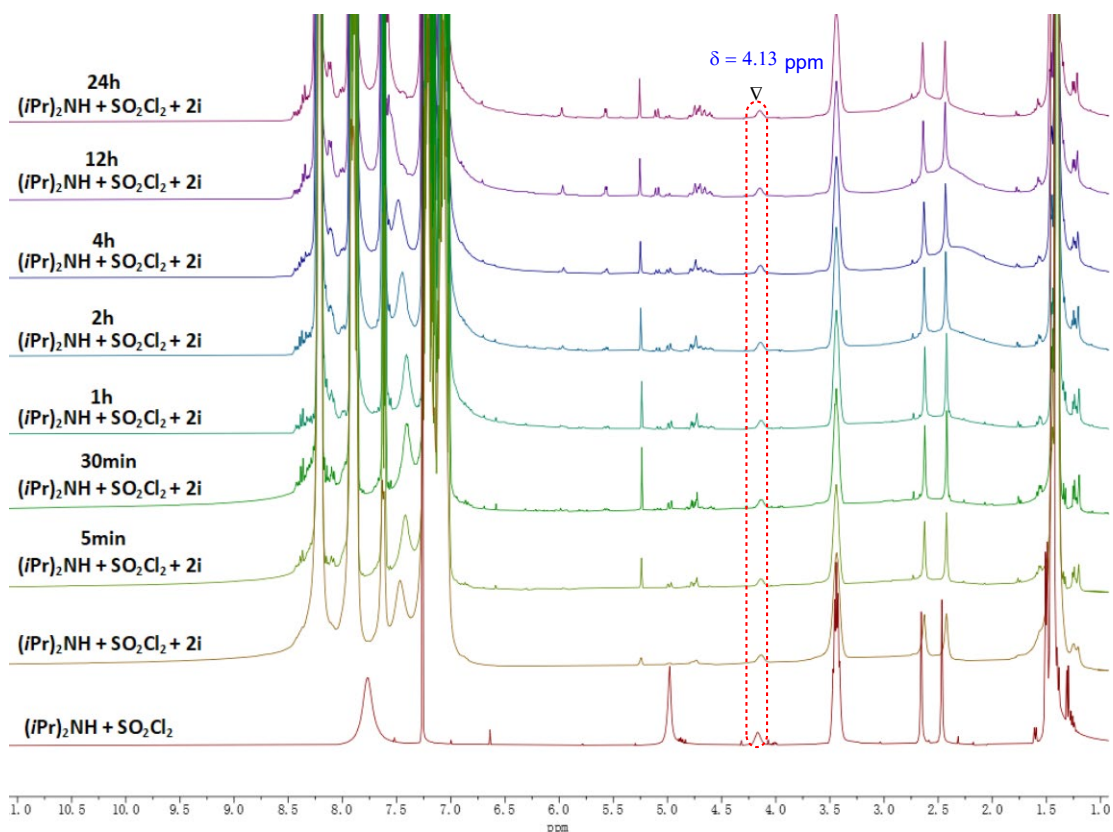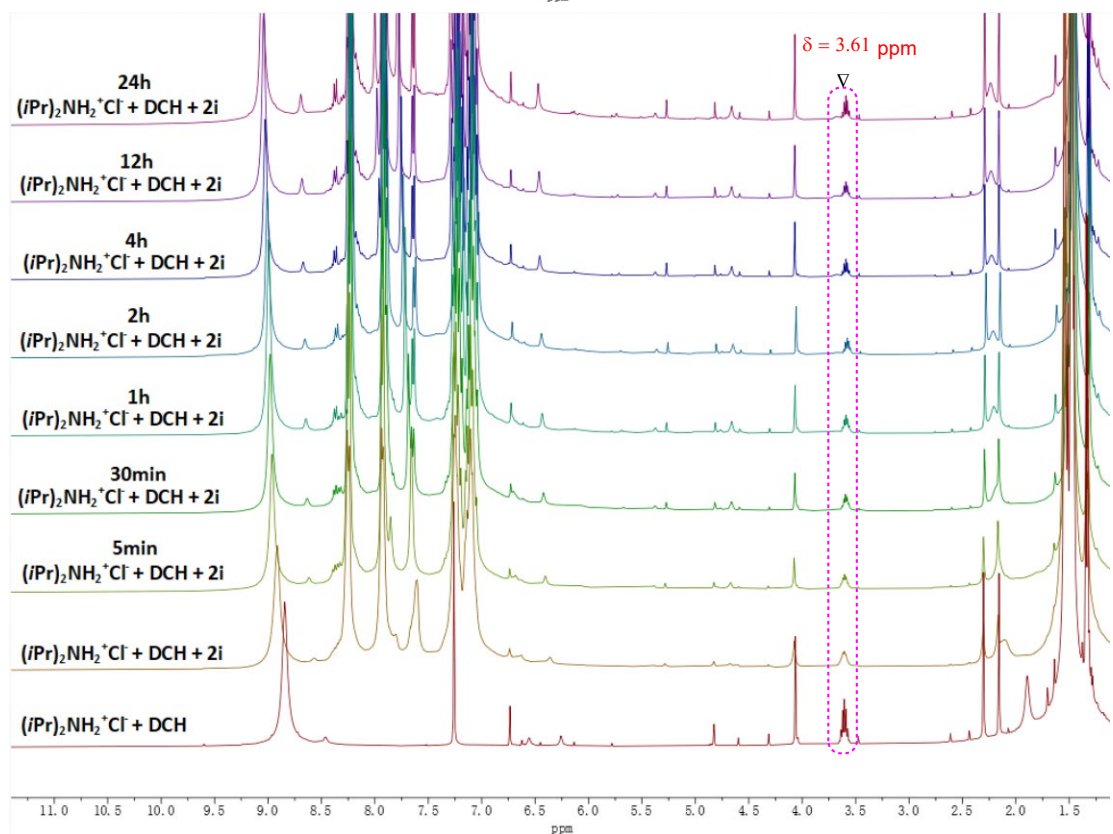

Notes: The NMR experiments were conducted using species **A** and the active cationic species with substrate **2i** in  $\text{CDCl}_3$  at  $25^\circ\text{C}$ , respectively. These results suggested that the species **A** (4.1 ppm) and the active cationic species (3.6 ppm) were not interchangeable with substrate at  $25^\circ\text{C}$ .

## (M) References

1. S. Li.; R. Khan.; X. Zhang.; Y. Yang.; Z. Wang.; Y. Zhan.; Y. Dai.; Y.-E. Liu.; B. Fan. *Org. Biomol. Chem.* **2019**, *17*, 5891–5896.
2. X. Xiong.; Y.-Y. Yeung, *Angew. Chem. Int. Ed.* **2016**, *55*, 16101–16105.
3. K. Seth.; M. Nautiyal.; P. Purohit.; N. Parikh.; A. K. Chakraborti. *Chem. Commun.* **2015**, *51*, 191–194.
4. X.-B. Bu.; Z. Wang.; Y.-H. Wang.; T. Jiang.; L. Zhang.; Y.-L. Zhao. *Eur. J. Org. Chem.* **2017**, 1132–1138.
5. L. R. Reddy.; S. Kotturi.; Y. Waman.; V. R. Reddy.; C. Patel.; A. Kobarne.; S. Kuttappan. *J. Org. Chem.* **2018**, *83*, 13854–13860.
6. W. B. Im.; S. H. Choi.; J.-Y. Park.; S. H. Choi.; J. Finn.; S.-H. Yoon. *Eur. J. Med. Chem.* **2011**, *46*, 1027–1039.
7. H. Lebel.; O. Leogane. *Org. Lett.* **2006**, *8*, 5717–5720.
8. H. R. Khatri.; J. Zhu. *Chem. Eur. J.* **2012**, *18*, 12232–12236.
9. P. R. Sultane.; T. B. Mete.; R. G.; Bhat. *Tetrahedron Lett.* **2015**, *56*, 2067–2070.
10. S.-Y. Moon.; U. B. Kim.; D.-B. Sung.; W.-S.; Kim. *J. Org. Chem.* **2015**, *80*, 1856–1865.
11. S.-P. Wang.; C. W. Cheung.; J.-A. Ma. *J. Org. Chem.* **2019**, *84*, 13922–13934.
12. Y. Chen.; H. Feng. *Asian. J. Chem.* **2013**, *25*, 9066–9068.
13. M. S. McCammant.; S. Thompson.; A. F. Brooks.; S. W. Krska.; P. J. H. Scott.; M. S. Sanford. *Org. Lett.* **2017**, *19*, 3939–3942.
14. Q. Dai.; P. Li.; N. Ma.; C. Hu. *Org. Lett.* **2016**, *18*, 5560–5563.
15. F. Liu.; N. Wu.; X. Cheng. *Org. Lett.* **2021**, *23*, 3015–3020.
16. A. N. Dinh.; S. M. Maddox.; S. D. Vaidya.; M. A. Saputra.; C. J. Nalbandian.; J. L. Gustafson. *J. Org. Chem.* **2020**, *85*, 13895–13905.



# (N) <sup>1</sup>H and <sup>13</sup>C Spectra

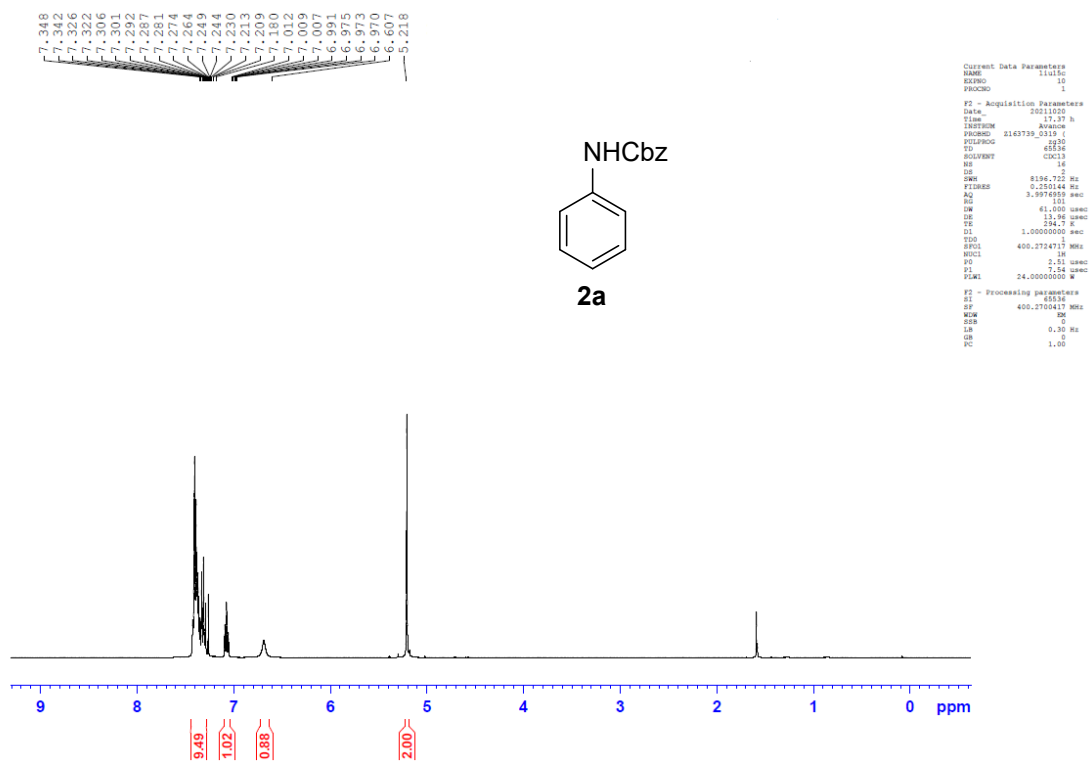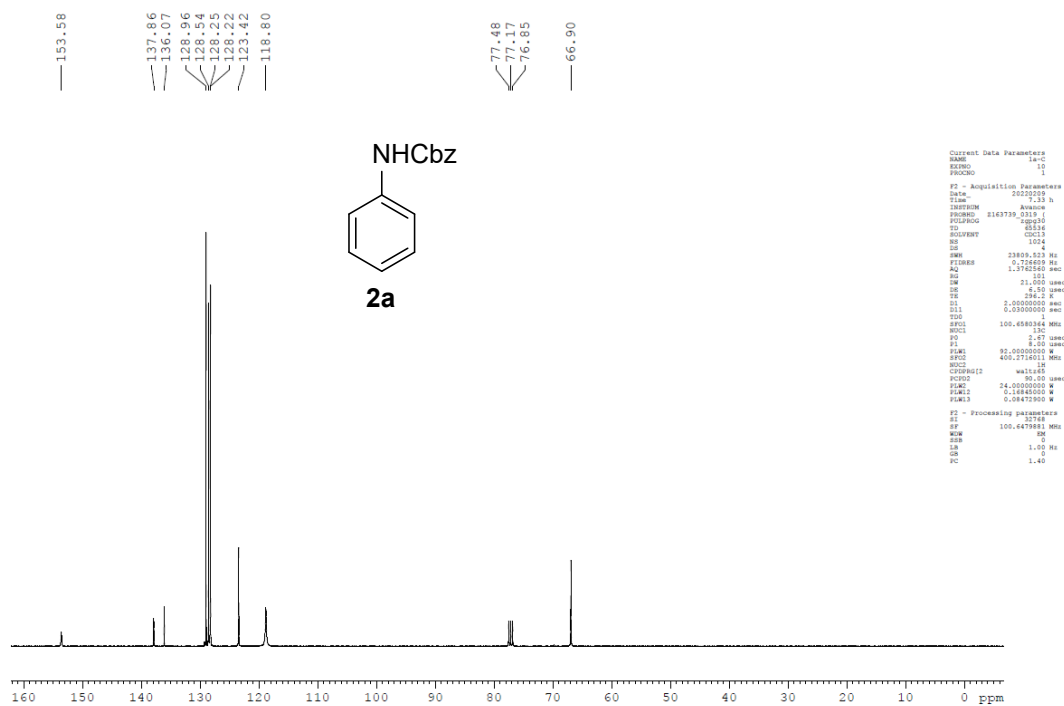

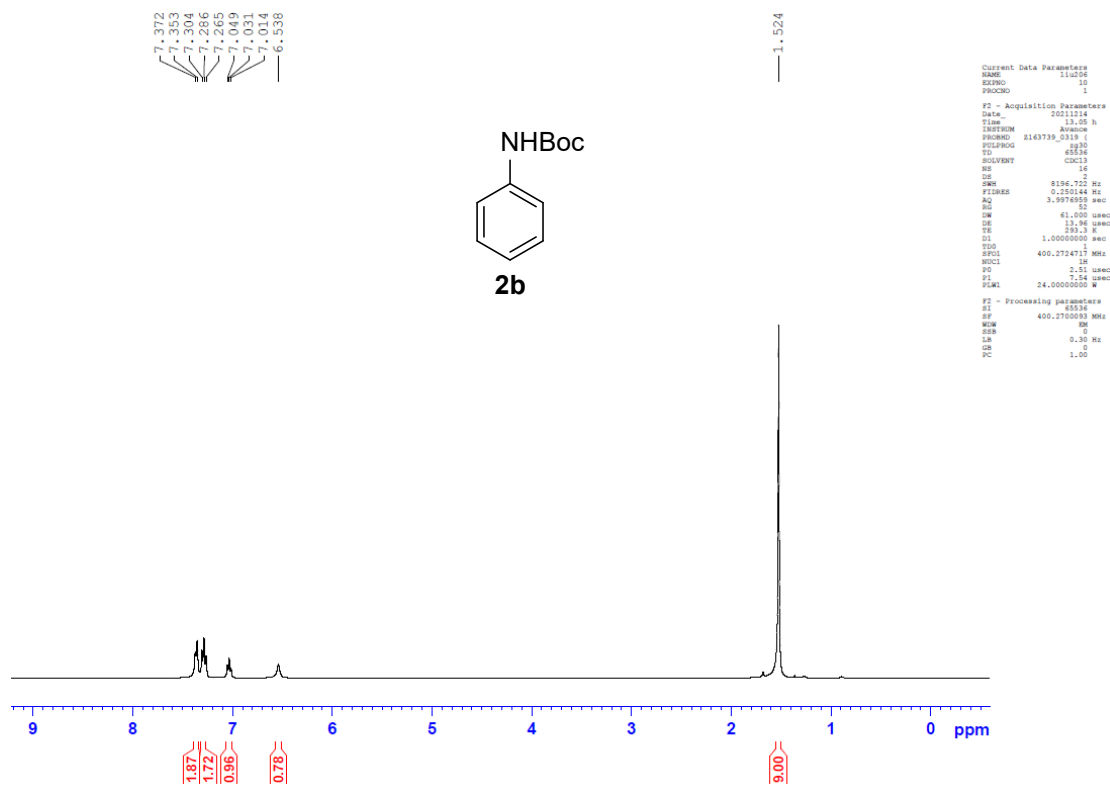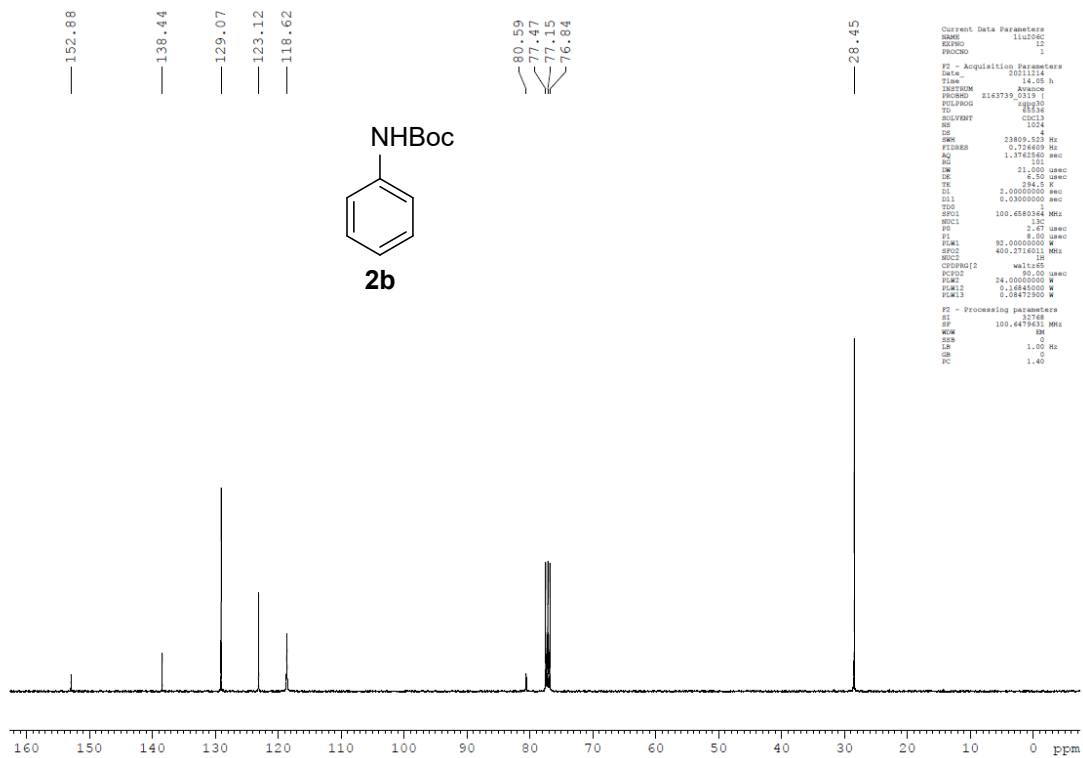

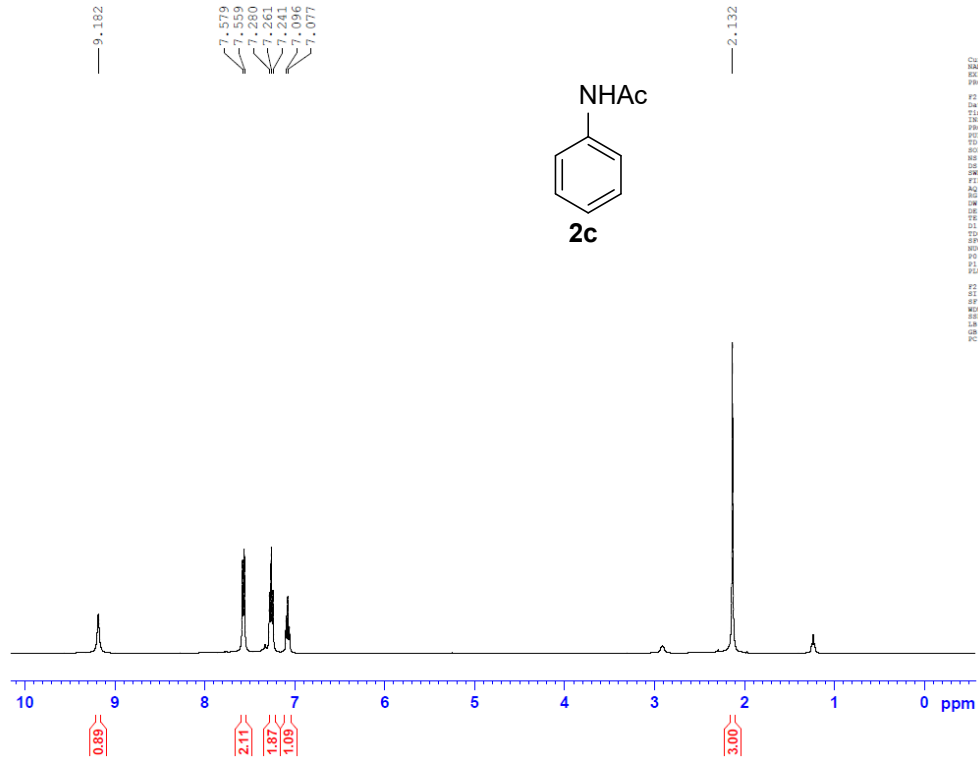

```

Current Data Parameters
NAME      110261-8
EXPNO    10
PROCNO   1
F2 - Acquisition Parameters
Date_    20220219
Time     15.42
INSTRUM  Avance
PROBHD   513739_019 (
PULPROG  zgpg30
TD       65536
SOLVENT  CDCl3
NS       16
DS       4
SWH      8196.722 Hz
FIDRES   0.250144 Hz
AQ       3.973553 sec
RG       327.5
SQ       16.48003
WDW      EM
SSB      0
LB       13.000 usec
TE       301.2 K
D1       1.0000000 sec
D11      0.0000000 sec
TDO      0.0000000
SFO1     400.2714117 MHz
NUC1     13C
PC       1.00 usec
PL1      0.00 usec
PL2      0.00 usec
PL3      0.00 usec
PL4      0.00 usec
PL5      0.00 usec
PL6      0.00 usec
PL7      0.00 usec
PL8      0.00 usec
PL9      0.00 usec
PL10     0.00 usec
PL11     0.00 usec
PL12     0.00 usec
PL13     0.00 usec
PL14     0.00 usec
PL15     0.00 usec
PL16     0.00 usec
PL17     0.00 usec
PL18     0.00 usec
PL19     0.00 usec
PL20     0.00 usec
F2 - Processing parameters
SI       65536
SF       400.2714117 MHz
WDW      EM
SSB      0
LB       13.000 usec
GB       0
PC       1.00
  
```

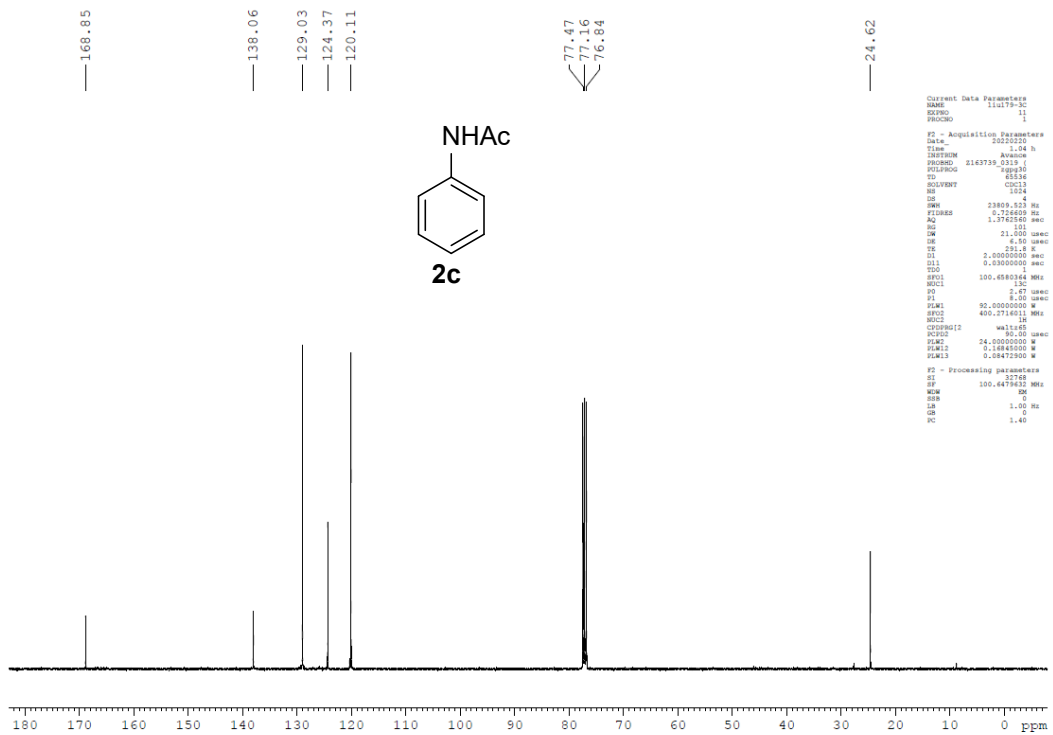

```

Current Data Parameters
NAME      110179-3C
EXPNO    11
PROCNO   1
F2 - Acquisition Parameters
Date_    20220220
Time     1.04 h
INSTRUM  Avance
PROBHD   513739_019 (
PULPROG  zgpg30
TD       65536
SOLVENT  CDCl3
NS       16
DS       4
SWH      23809.523 Hz
FIDRES   0.728609 Hz
AQ       1.3762160 sec
RG       327.5
SQ       16.48003
WDW      EM
SSB      0
LB       13.000 usec
TE       301.2 K
D1       1.0000000 sec
D11      0.0000000 sec
TDO      0.0000000
SFO1     100.628164 MHz
NUC1     13C
PC       1.00 usec
PL1      0.00 usec
PL2      0.00 usec
PL3      0.00 usec
PL4      0.00 usec
PL5      0.00 usec
PL6      0.00 usec
PL7      0.00 usec
PL8      0.00 usec
PL9      0.00 usec
PL10     0.00 usec
PL11     0.00 usec
PL12     0.00 usec
PL13     0.00 usec
PL14     0.00 usec
PL15     0.00 usec
PL16     0.00 usec
PL17     0.00 usec
PL18     0.00 usec
PL19     0.00 usec
PL20     0.00 usec
F2 - Processing parameters
SI       65536
SF       100.628164 MHz
WDW      EM
SSB      0
LB       13.000 usec
GB       0
PC       1.00
  
```

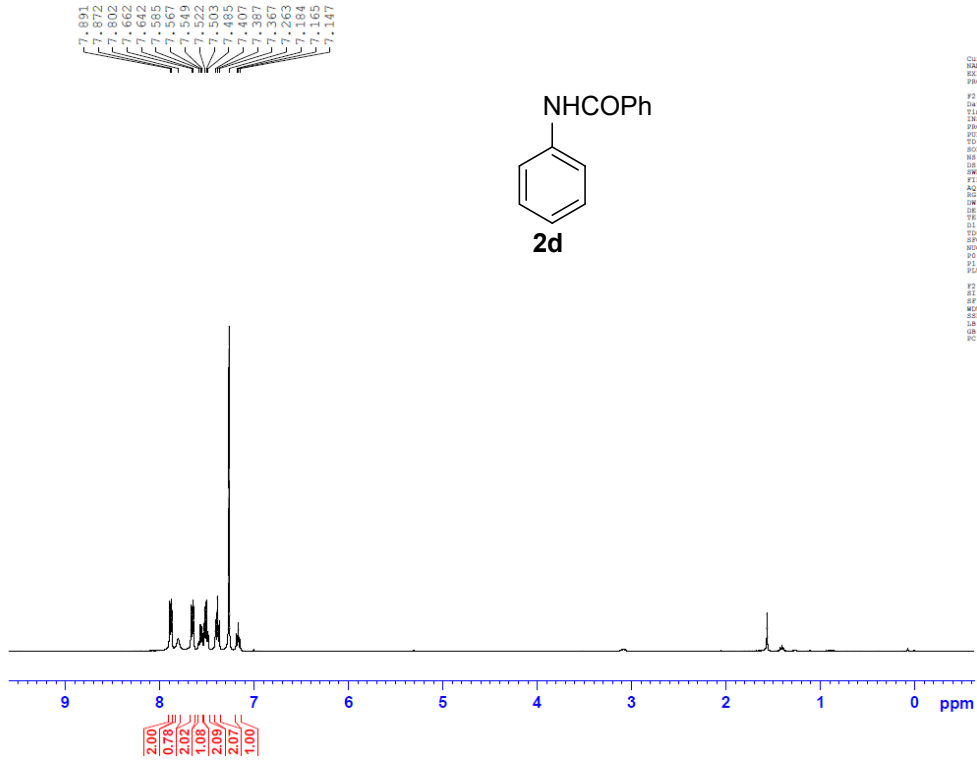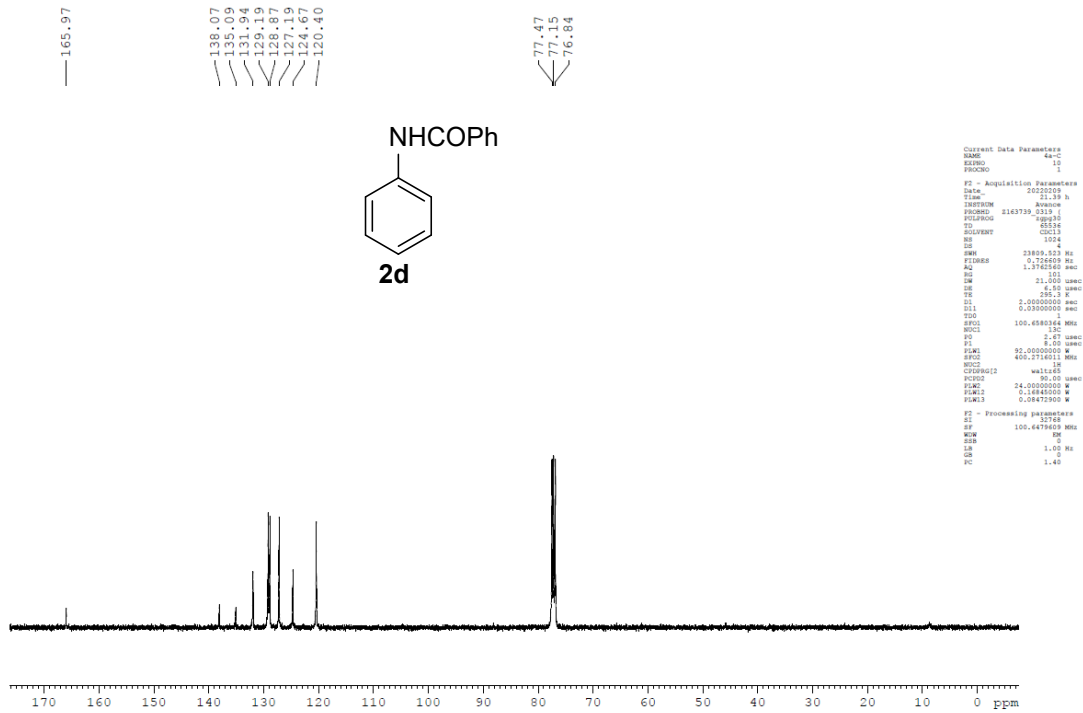

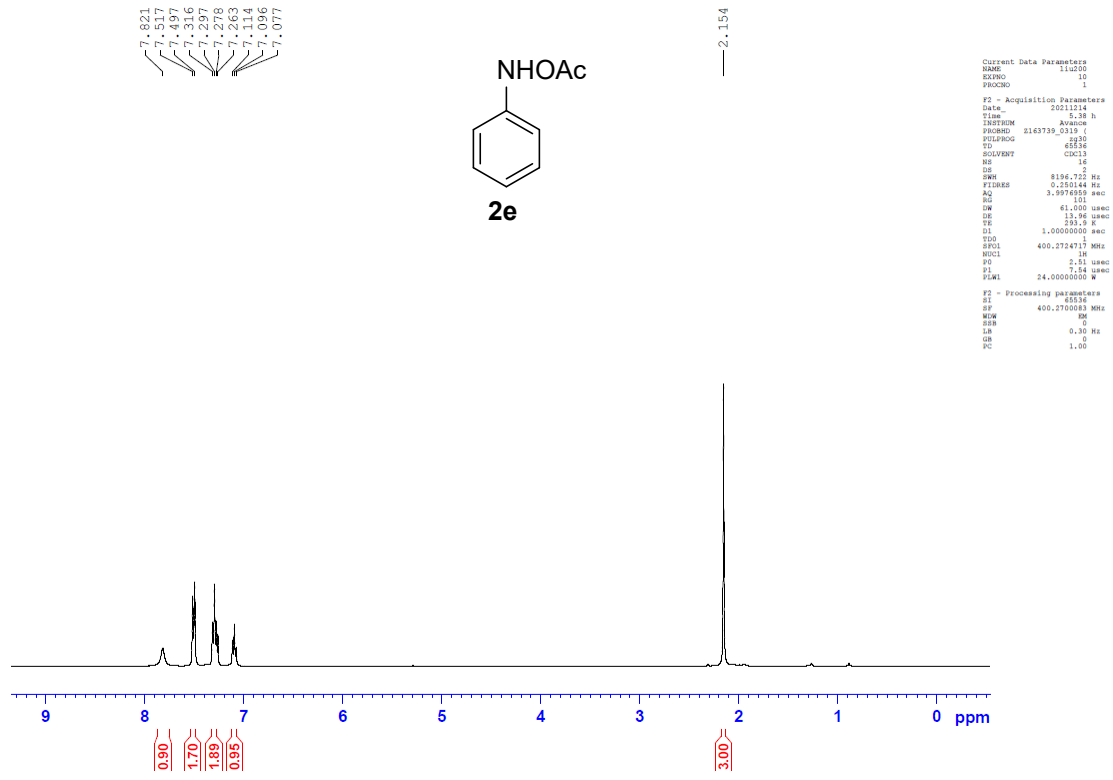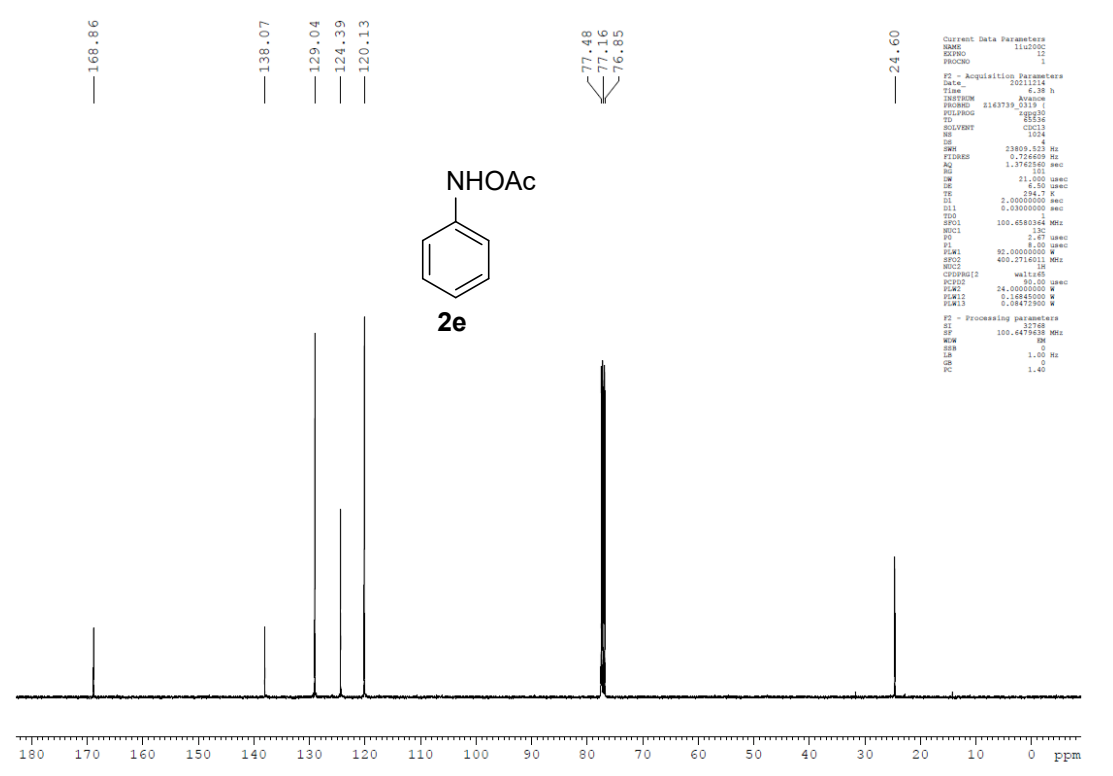

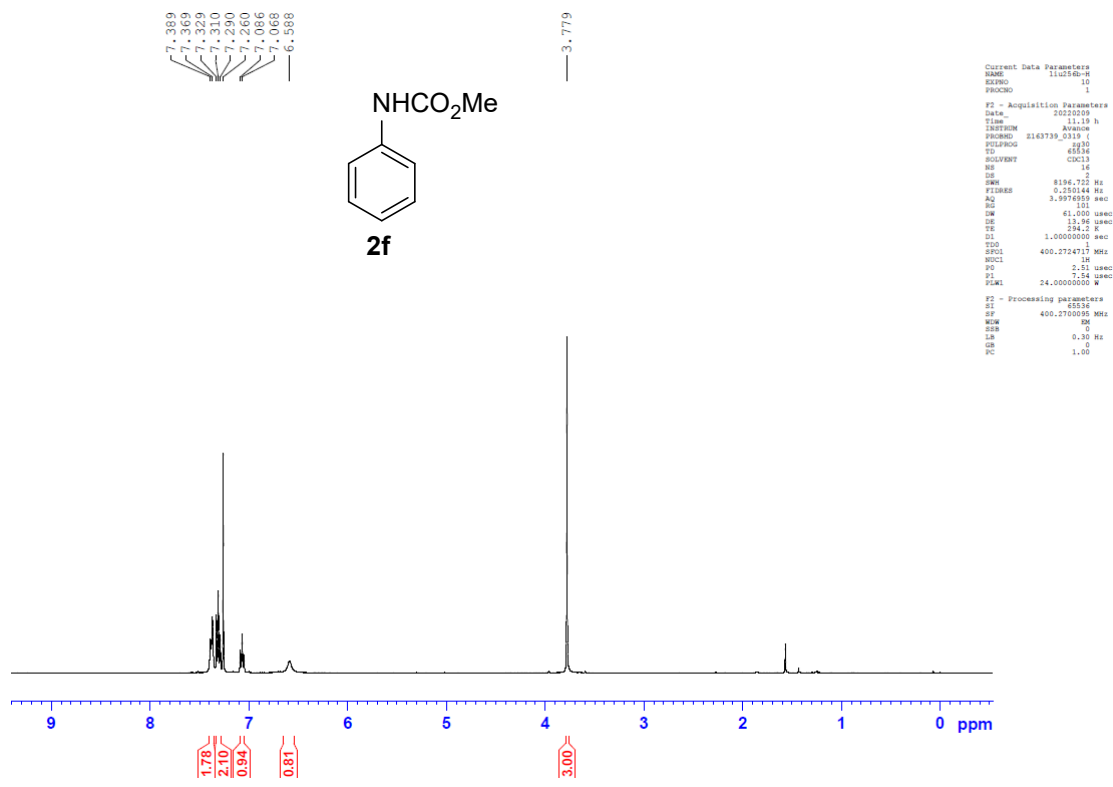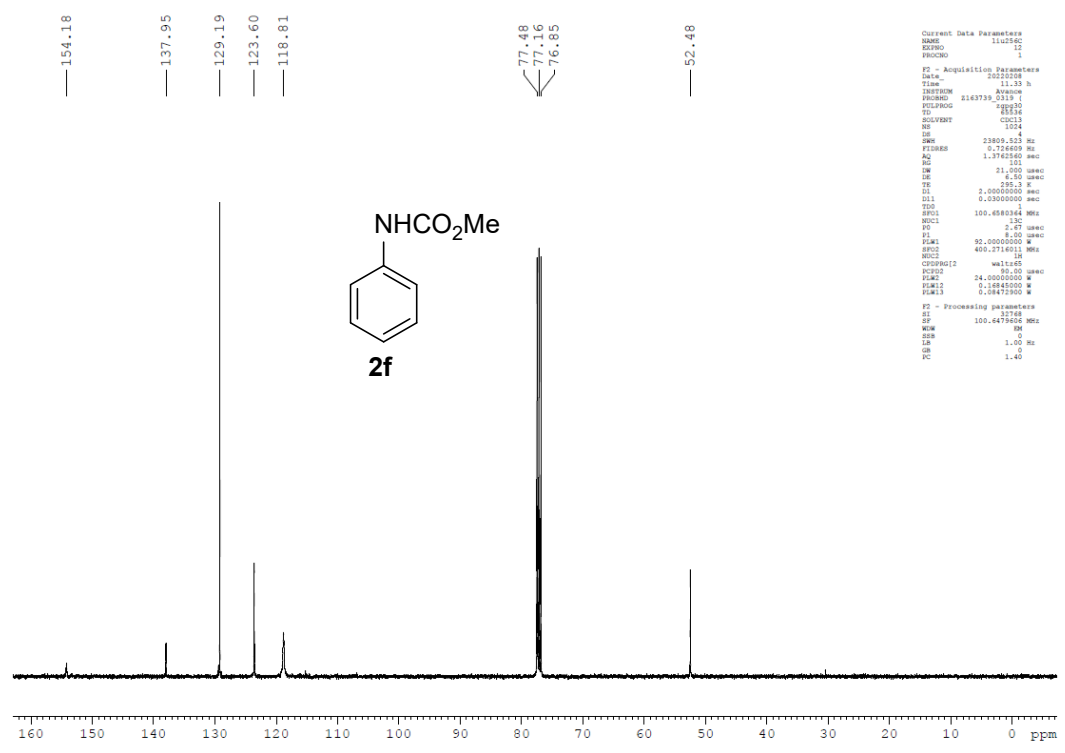

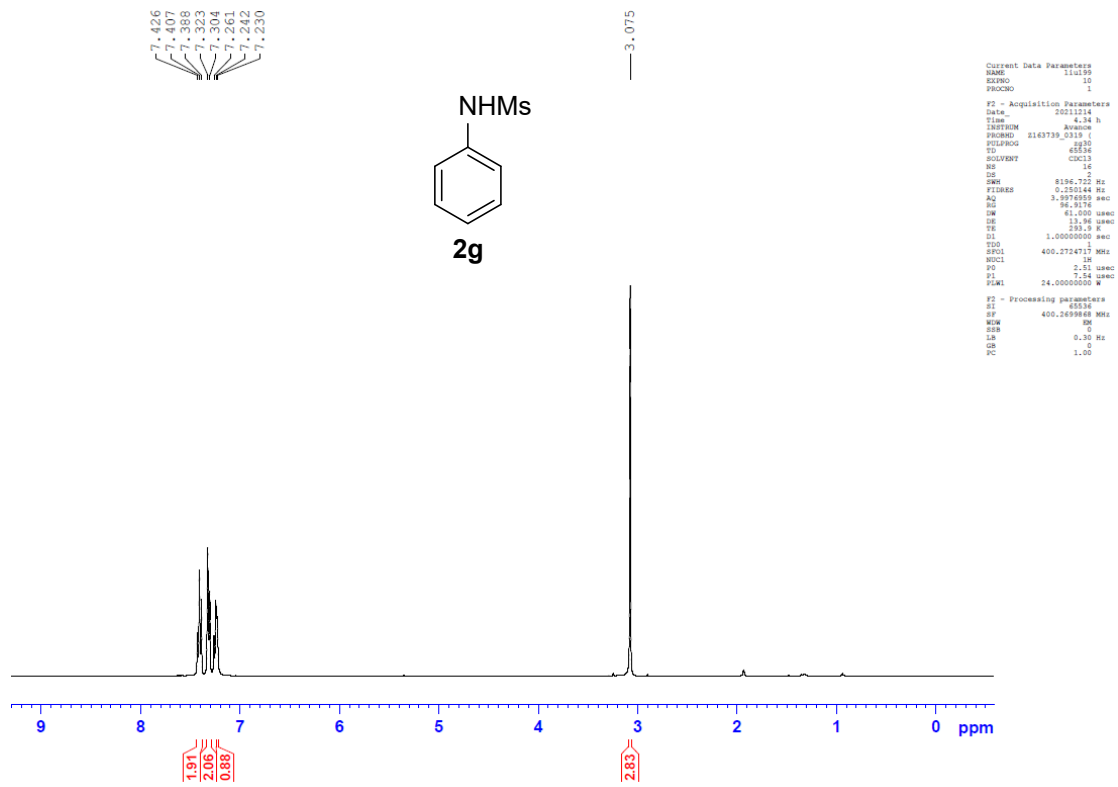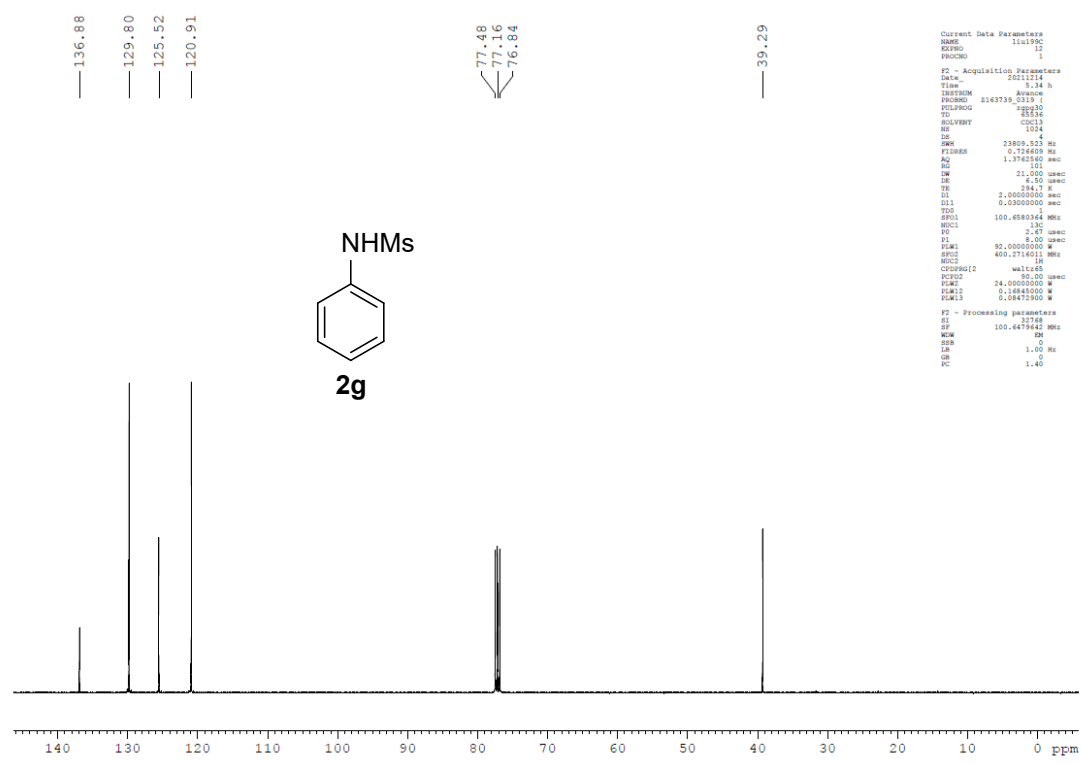

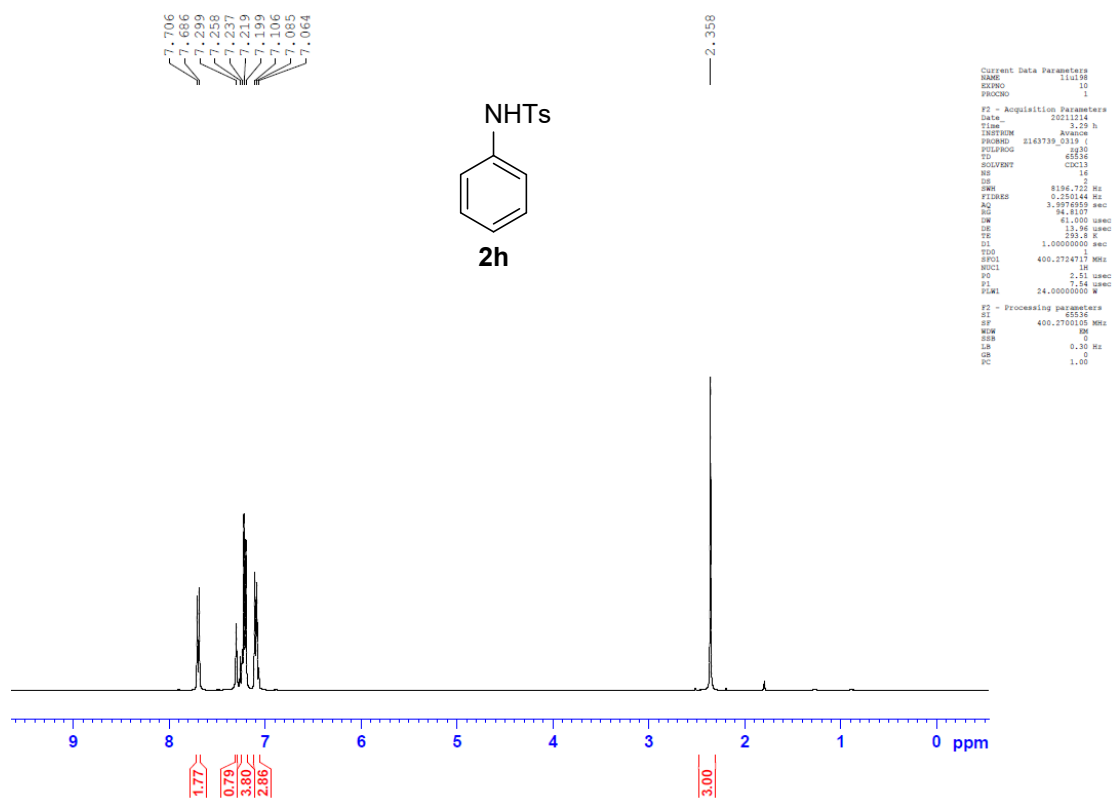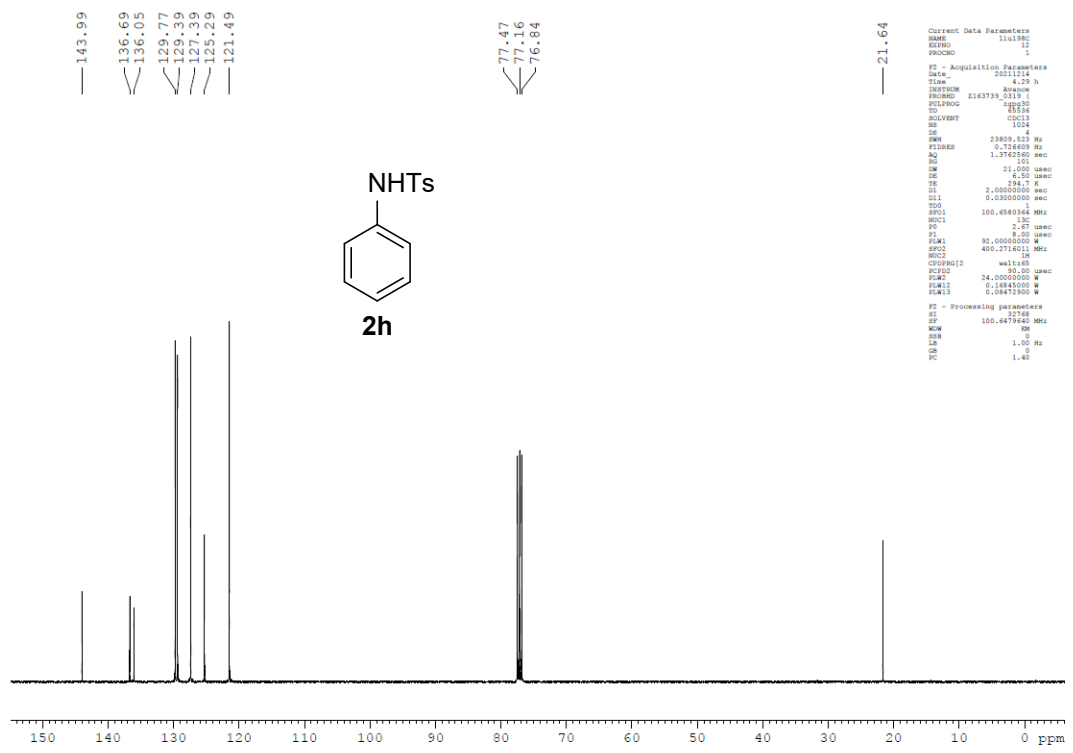



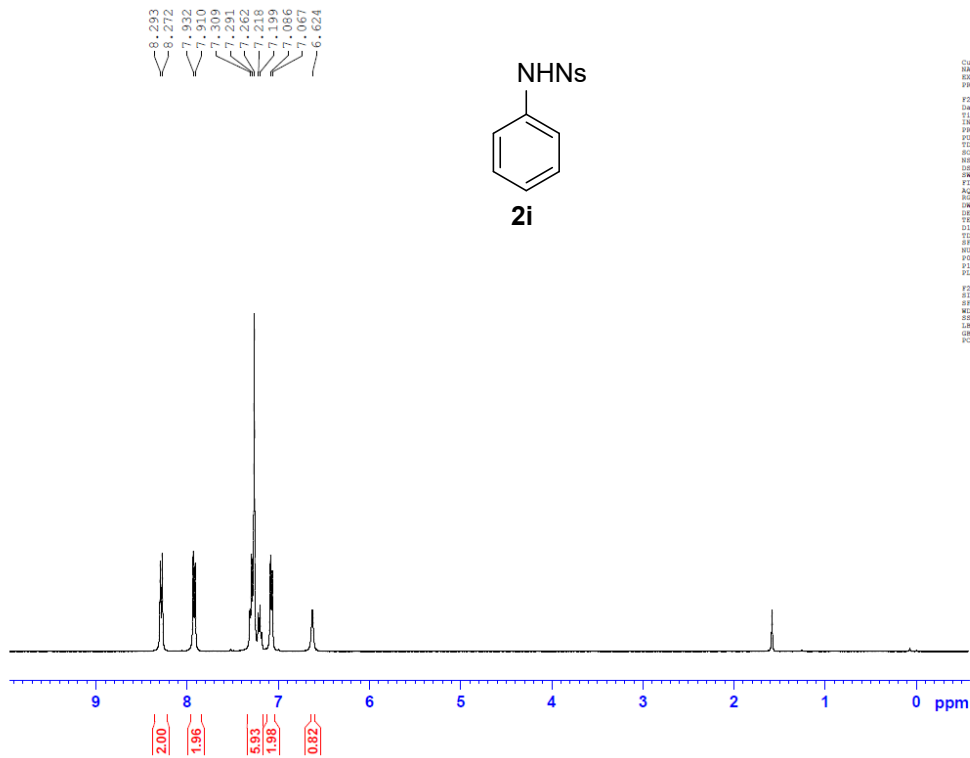

```

Current Data Parameters
NAME      110203C
EXPNO     12
PROCNO    1
F2 - Acquisition Parameters
Date_     20220208
Time      21.15 h
INSTRUM   AVANCE
PROBHD    2143739_0319
PULPROG   zgpg30
SOLVENT   CDCl3
NS        14
DS        2
SWH       8196.722 Hz
FIDRES    0.255144 Hz
AQ        3.9974855 sec
RG        100
DE        41.000 umm
DM        11.96 umm
TE        298.2 K
D1        1.0000000 sec
TSD       1
SFO1      400.2724717 MHz
NUC1      1H
PC        2.51 umm
PL        1.54 umm
PLW1      24.0000000 W
  
```

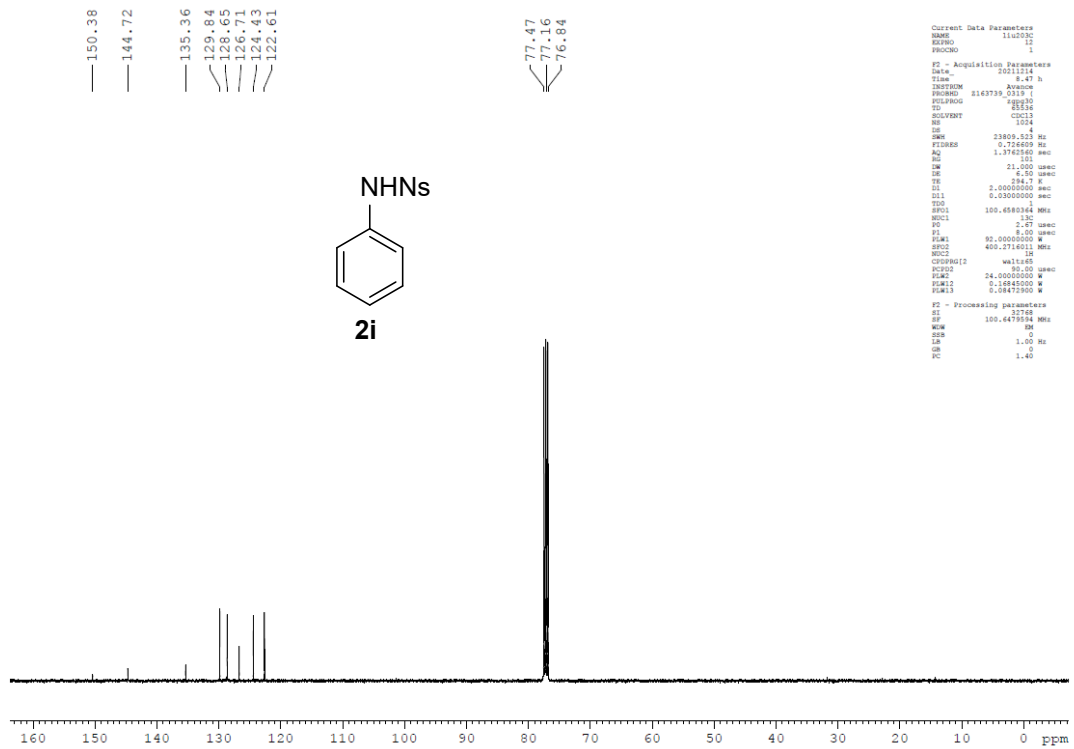

```

Current Data Parameters
NAME      110203C
EXPNO     12
PROCNO    1
F2 - Acquisition Parameters
Date_     20220208
Time      8.47 h
INSTRUM   AVANCE
PROBHD    2143739_0319
PULPROG   zgpg30
SOLVENT   CDCl3
NS        14
DS        2
SWH       23809.513 Hz
FIDRES    0.724609 Hz
AQ        1.1742320 sec
RG        100
DE        21.000 umm
DM        8.30 umm
TE        298.2 K
D1        2.0000000 sec
D11       0.0300000 sec
TSD       1
SFO1      100.6261254 MHz
NUC1      13C
PC        2.67 umm
PL        8.30 umm
PLW1      90.0000000 W
PLW2      400.2718010 MHz
PLW3      14
CPDPRG2   waltz165
NUC2      1H
PCW2      24.0000000 W
PLW2      0.1684000 W
PLW3      0.0847390 W
  
```

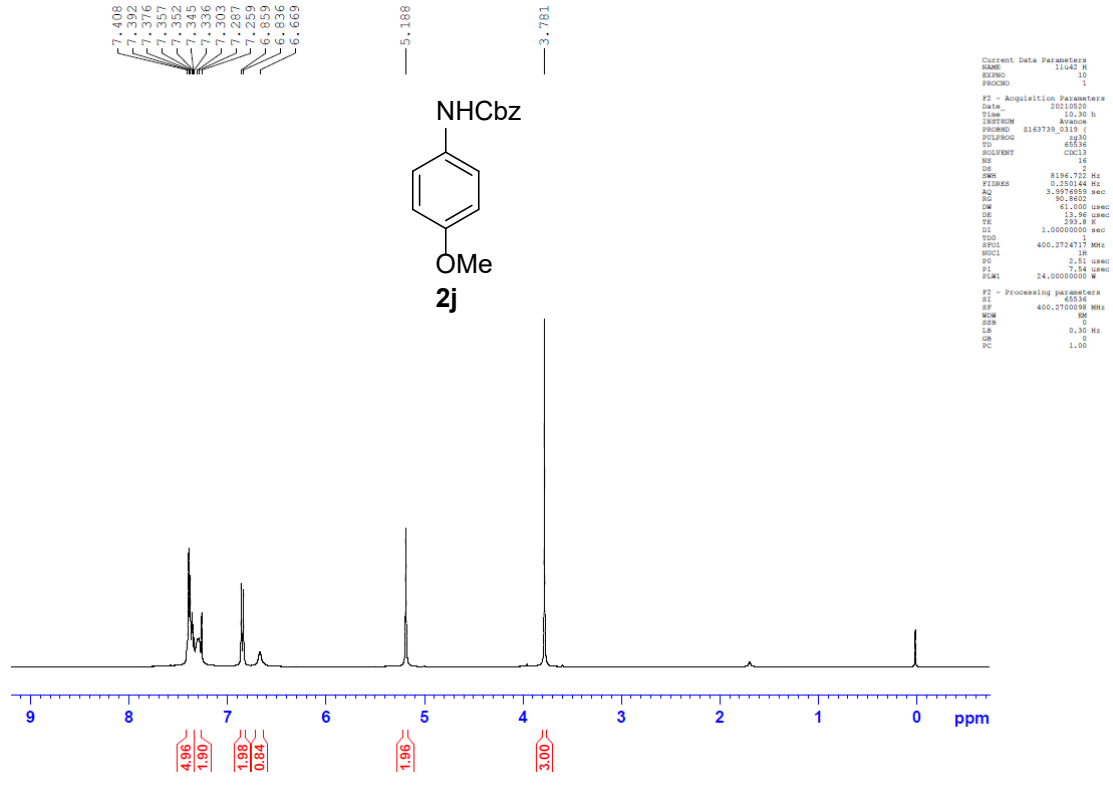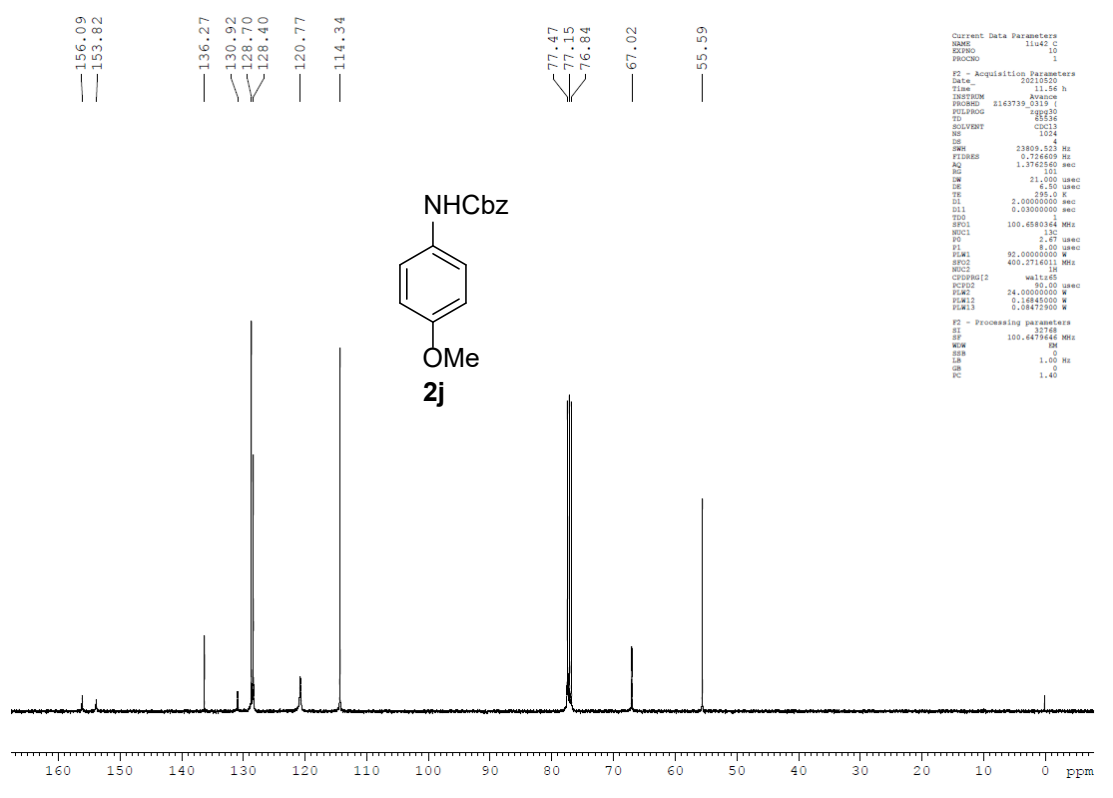

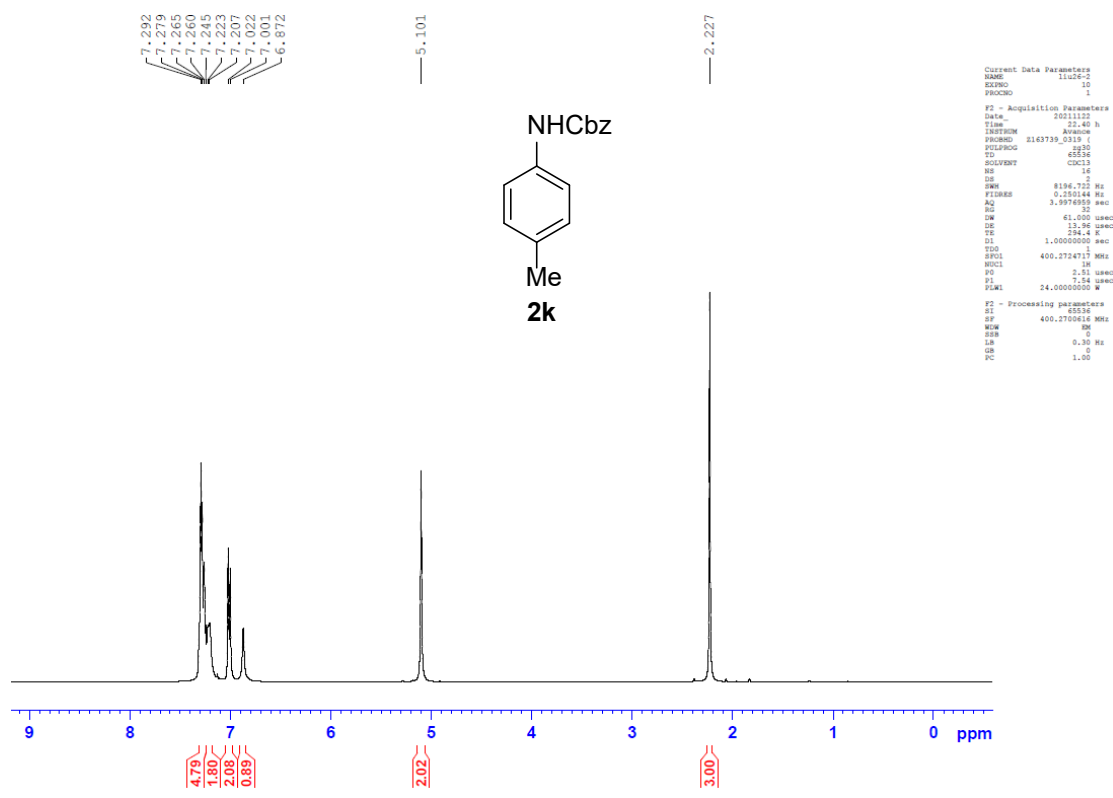

```

Current Data Parameters
NAME      11267-2
EXPNO    10
PROCNO   1

F2 - Acquisition Parameters
Date_    20111123
Time     21.40 h
INSTRUM  Avance
PROBHD   513739_0319 f
PULPROG  zgpg30
TD        65536
SOLVENT  CDCl3
NS        16
DS        4
SWH       8196.732 Hz
FIDRES   0.19144 Hz
AQ        3.9976993 sec
RG        32
DW        61.000 usec
DE        19.00 usec
TE        294.2 K
D1        1.0000000 sec
YD0       400.0724715 MHz
NUC1      13
PC        18
PS        1.01 usec
PL        7.54 usec
PL1       24.0000000 W

F2 - Processing parameters
SI        65536
SF        400.0706148 MHz
WDW       EM
SSB       0
LB        0.30 Hz
GB        0
PC        1.00
  
```

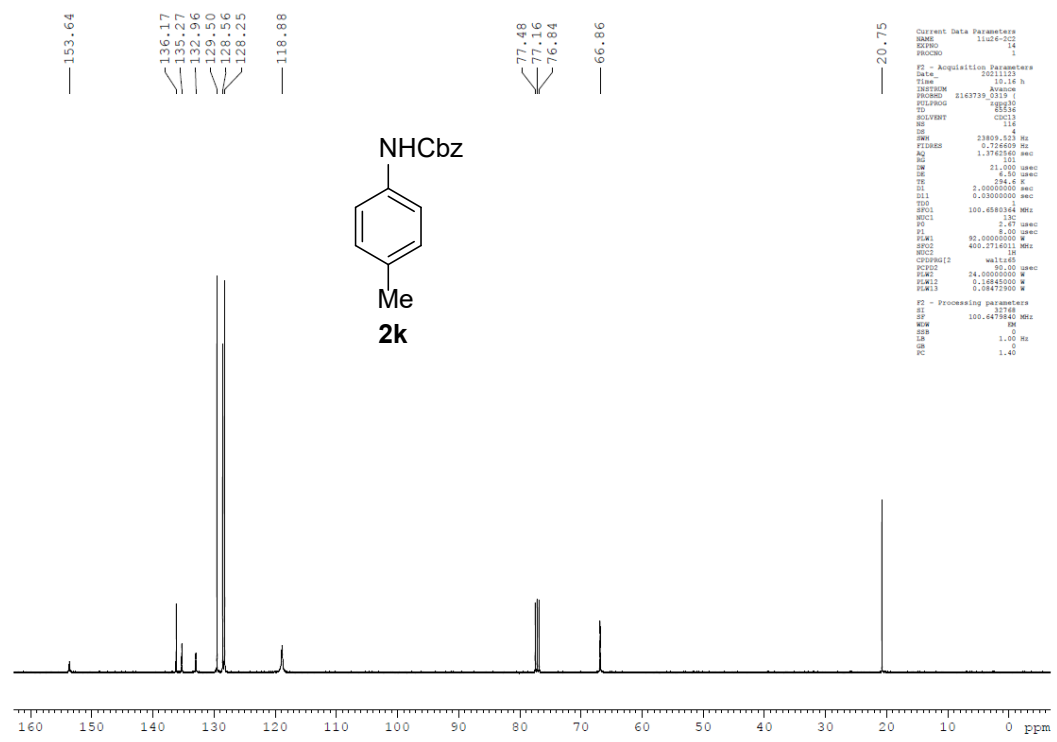

```

Current Data Parameters
NAME      11267-2
EXPNO    14
PROCNO   1

F2 - Acquisition Parameters
Date_    20111123
Time     10.16 h
INSTRUM  Avance
PROBHD   513739_0319 f
PULPROG  zgpg30
TD        65536
SOLVENT  CDCl3
NS        16
DS        4
SWH       23809.817 Hz
FIDRES   0.726609 Hz
AQ        1.3742560 sec
RG        101
DW        21.000 usec
DE        19.00 usec
TE        294.2 K
D1        1.0000000 sec
YD0       100.4580344 MHz
NUC1      13
PC        18
PS        2.87 usec
PL        81.00 usec
PL1       90.0000000 W
PL2       400.0714612 MHz
PL3       60.00 usec
CPDPRG2  waltz160
PL4       90.00 usec
PL5       24.0000000 W
PL6       0.12842000 W
PL7       0.08472900 W

F2 - Processing parameters
SI        65536
SF        100.4479240 MHz
WDW       EM
SSB       0
LB        1.00 Hz
GB        0
PC        1.40
  
```

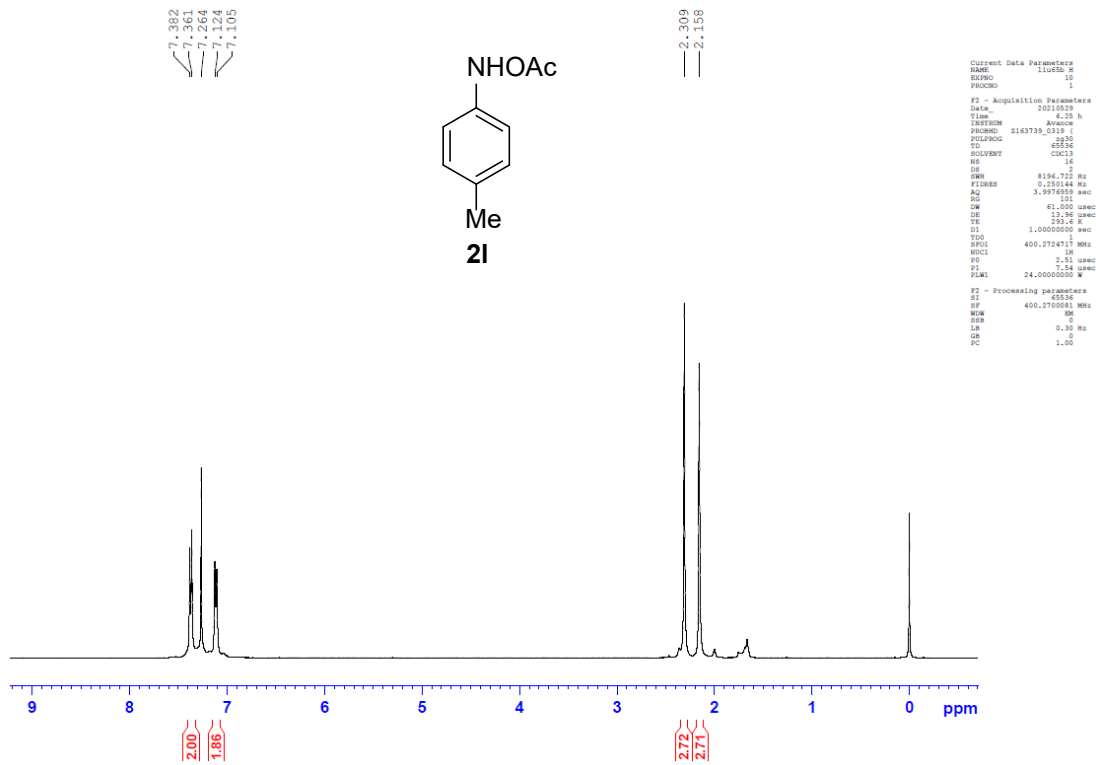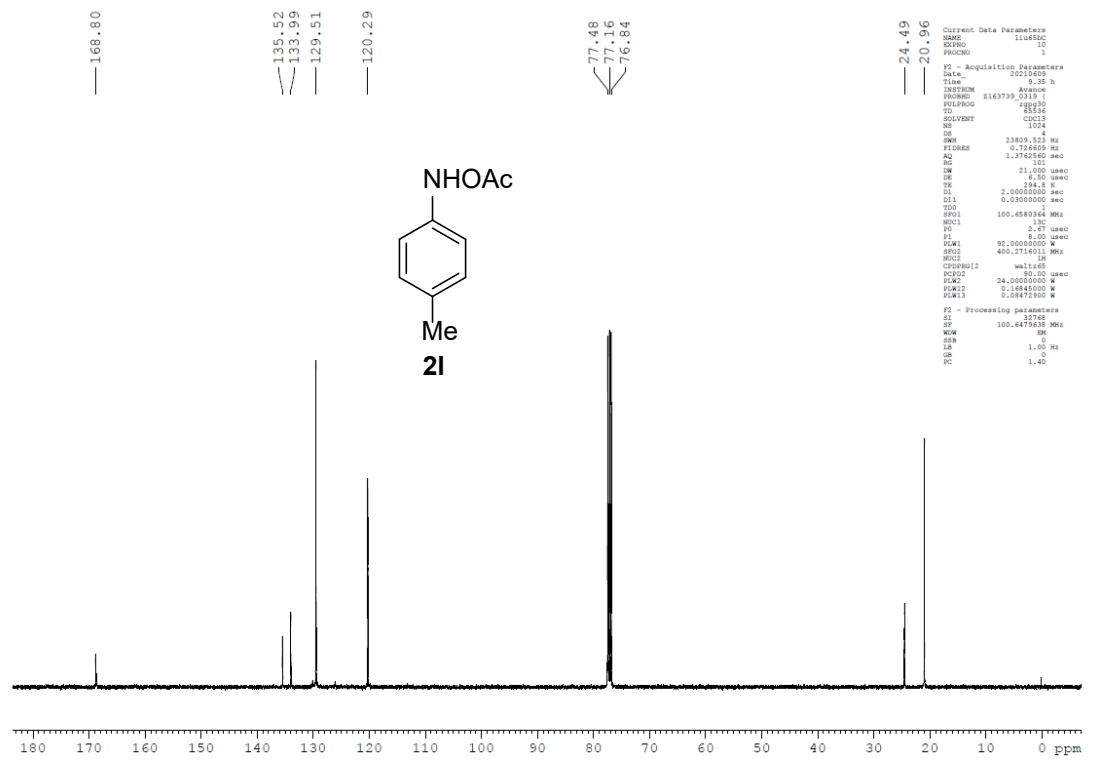

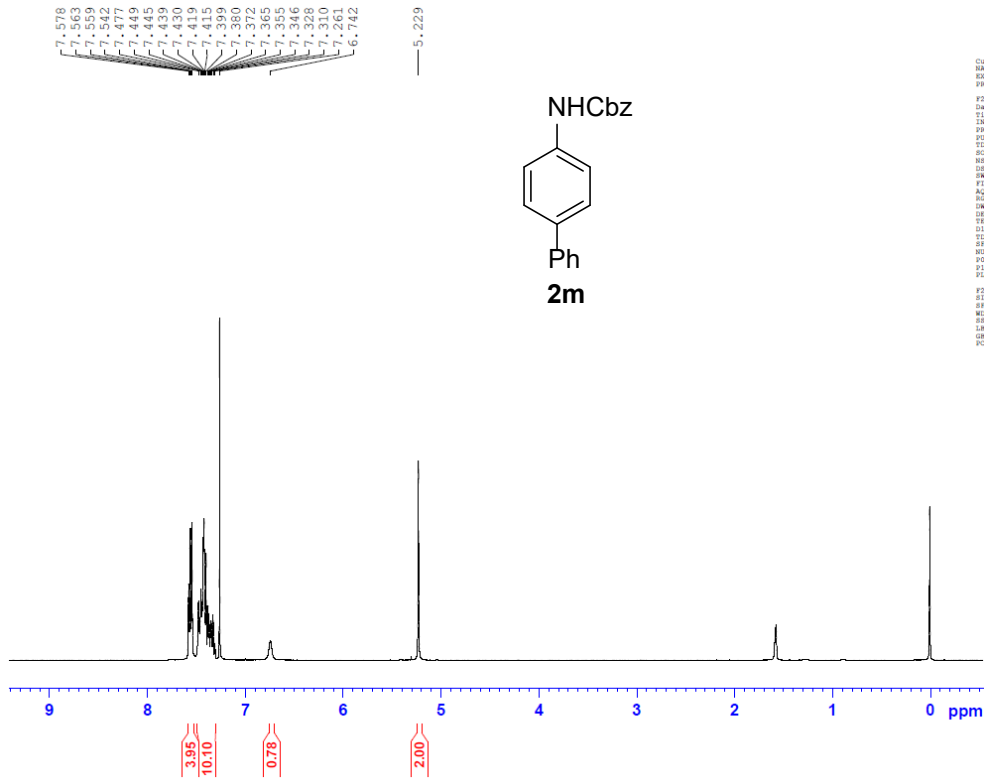

```

Current Data Parameters
NAME 114678_0
EXPNO 10
PROCNO 1
F2 - Acquisition Parameters
Date_ 20110724
Time 10:18 h
INSTRUM Avance
PROBHD 1H3139_0319 f
PULPROG zgpg30
TD 65536
SOLVENT cbr13
NS 16
DS 4
SWH 8194.722 Hz
FIDRES 0.250144 Hz
AQ 3.9974958 sec
RG 101
DW 41.000 usec
DE 15.66 usec
TE 300.2 K
D1 1.00000000 sec
TD0 1.00000000 sec
SFO 400.274717 MHz
NUC1 13C
PC 2.51 usec
PI 1.44 usec
PL1 24.0000000 W
F2 - Processing parameters
SI 65536
SF 400.2700122 MHz
WDW EM
SSB 0
LB 0.30 Hz
GB 1.00
PC 1.00
  
```

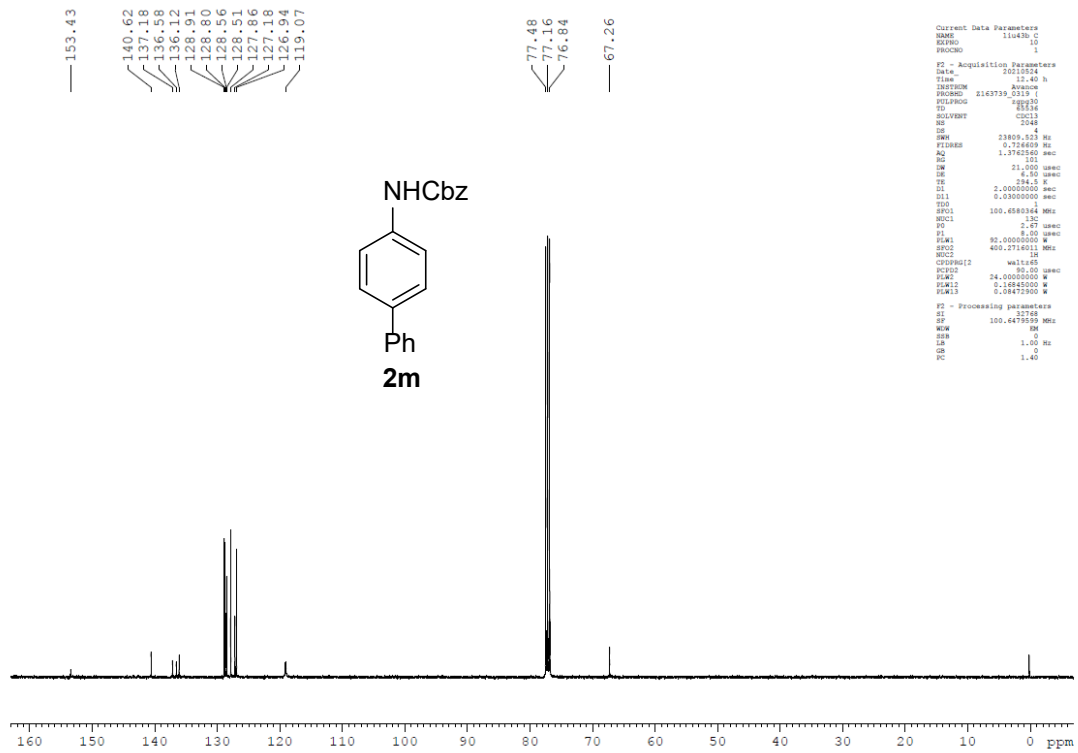

```

Current Data Parameters
NAME 114678_0
EXPNO 10
PROCNO 1
F2 - Acquisition Parameters
Date_ 20110724
Time 12:40 h
INSTRUM Avance
PROBHD 1H3139_0319 f
PULPROG zgpg30
TD 65536
SOLVENT cbr13
NS 16
DS 4
SWH 23809.823 Hz
FIDRES 0.724609 Hz
AQ 1.3742560 sec
RG 101
DW 21.000 usec
DE 8.50 usec
TE 300.2 K
D1 1.00000000 sec
D11 0.03000000 sec
SFO 100.6261364 MHz
NUC1 13C
PC 2.87 usec
PI 4.00 usec
PL1 80.0000000 W
SFO2 400.2747171 MHz
MUCS 16
CROSSPULP waltz16
PCPDZ 24.0000000 usec
PLA2 0.0000000 W
PLW12 0.16845000 W
PLA13 0.08473500 W
F2 - Processing parameters
SI 65536
SF 100.6478939 MHz
WDW EM
SSB 0
LB 1.00 Hz
GB 1.00
PC 1.00
  
```

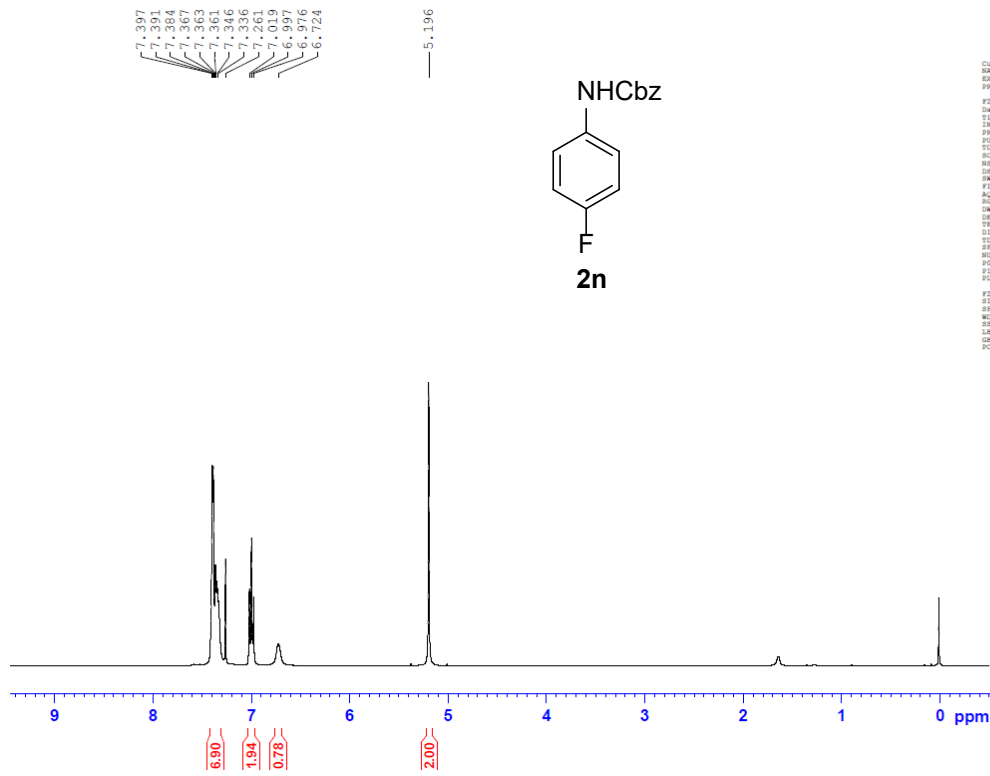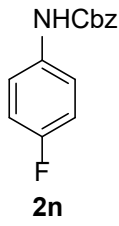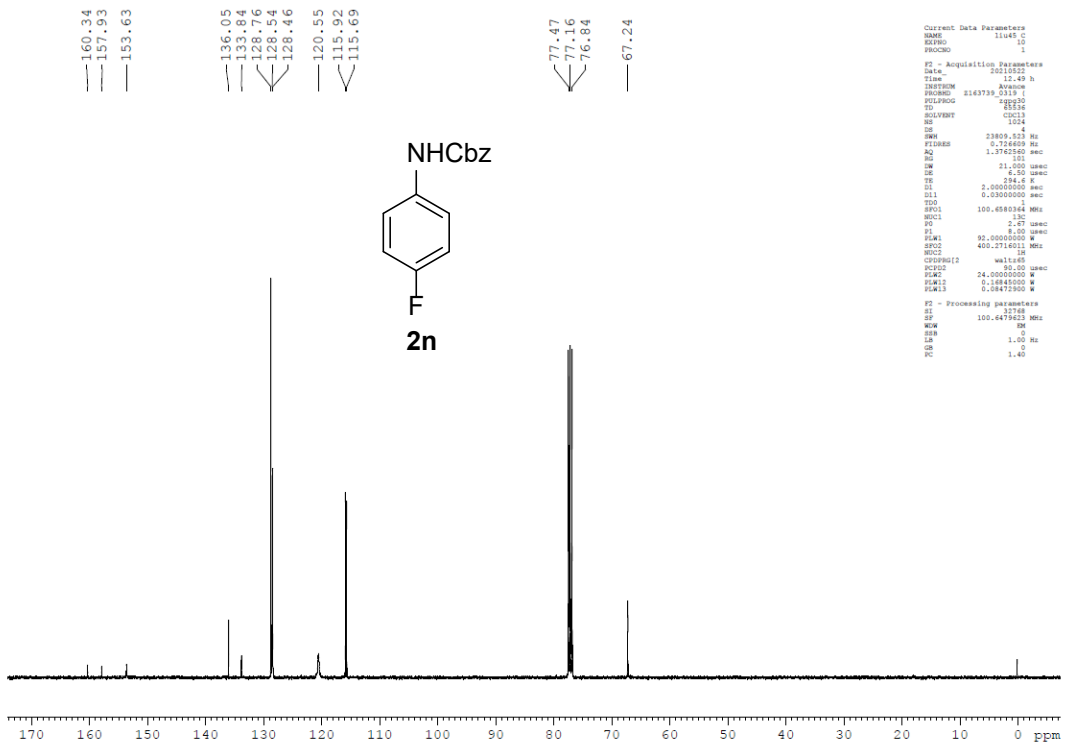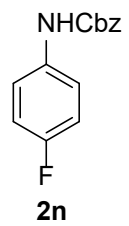

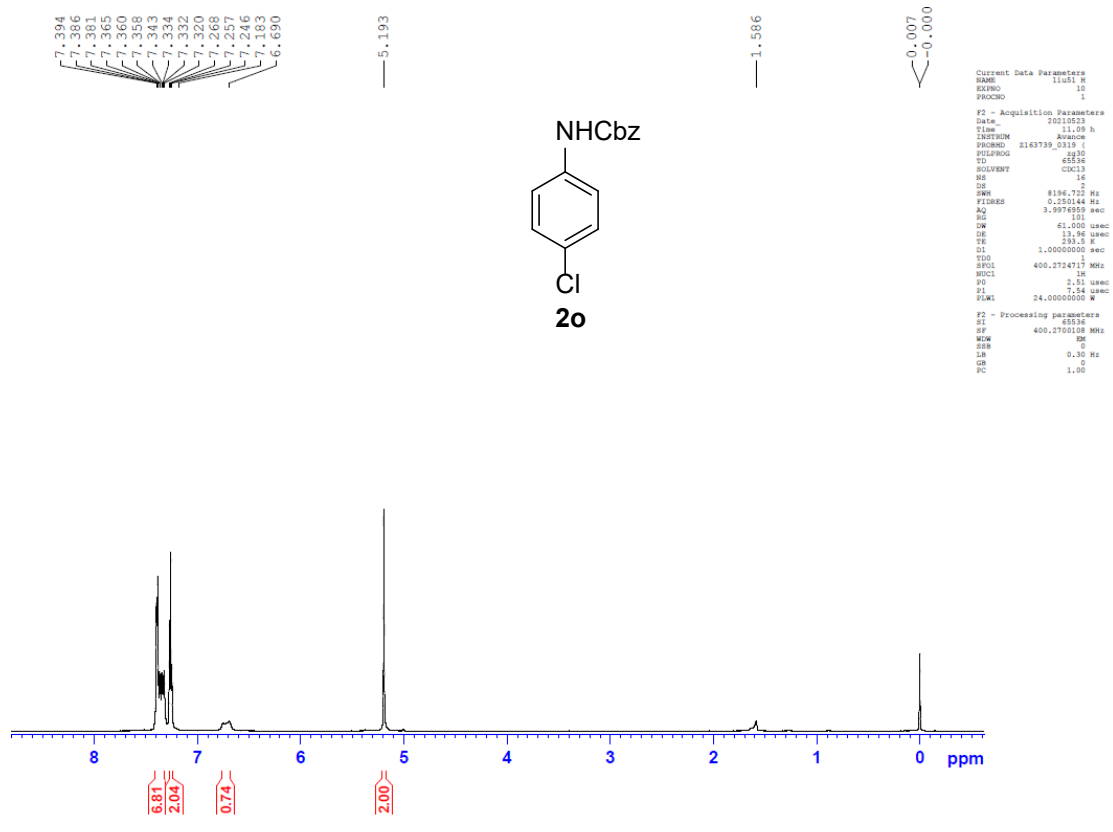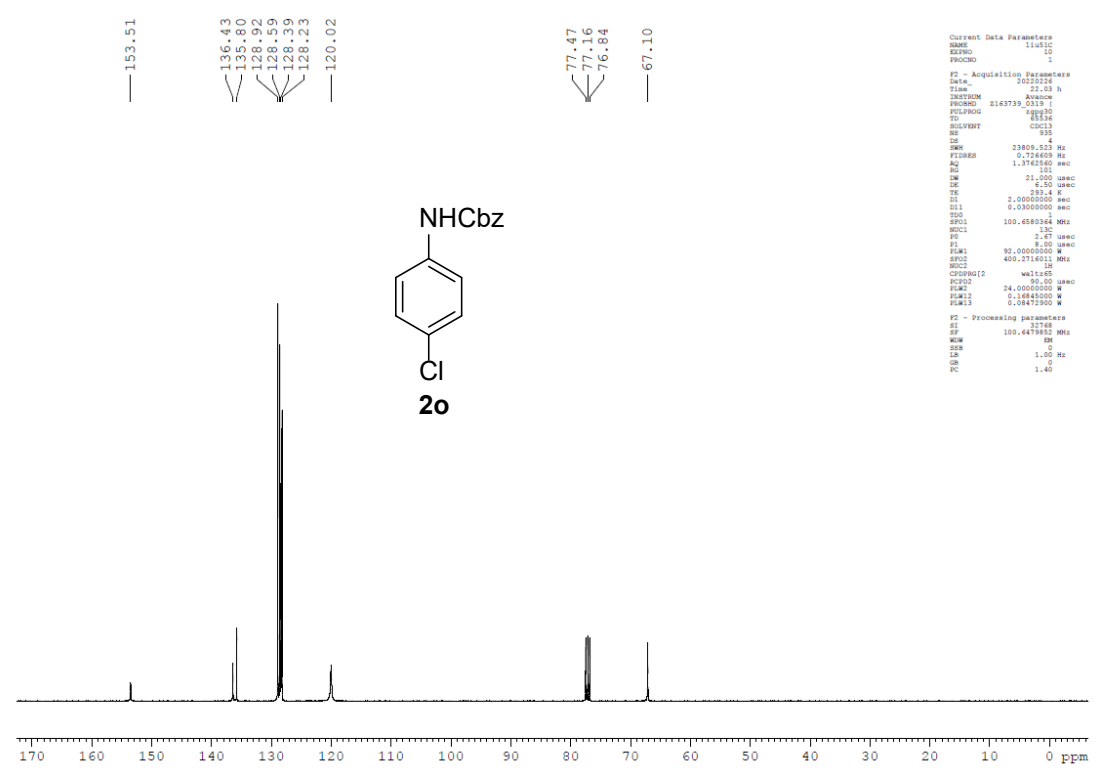

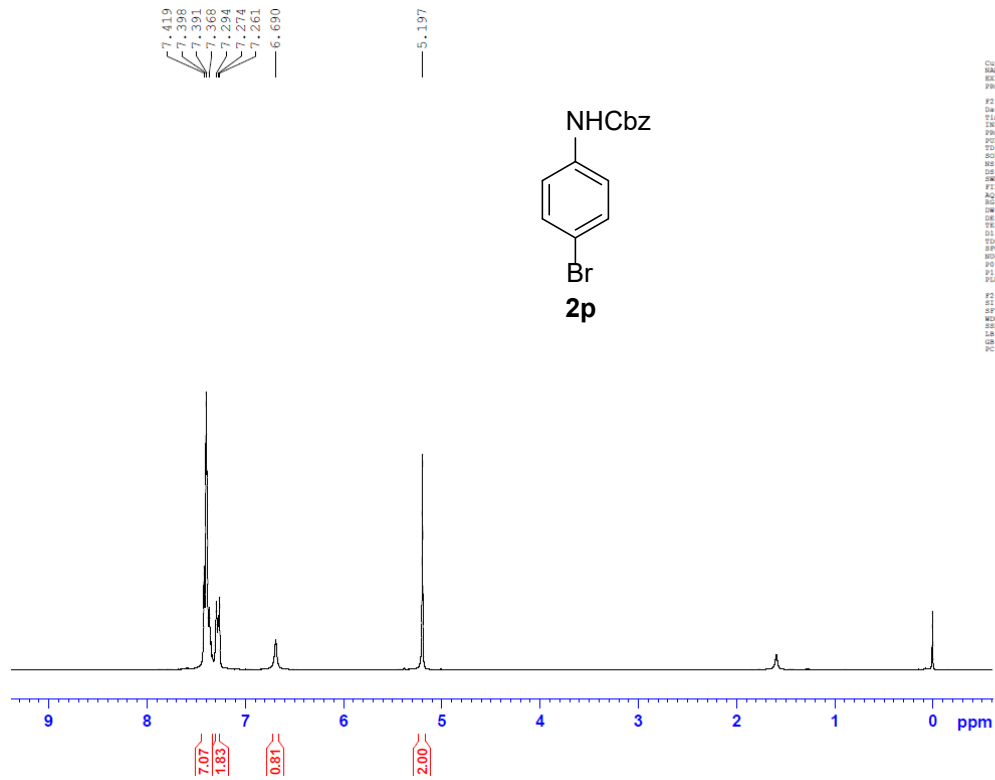

```

Current Data Parameters
NAME      116773
EXPNO    10
PROCNO   1

F2 - Acquisition Parameters
Date_    20110707
Time     9.58 h
INSTRUM  Avance
PROBHD   1H3139_0319
PULPROG  zgpg30
TD       65536
SOLVENT  CDCl3
NS       5
DS       16
SWH      8196.722 Hz
FIDRES   0.120144 Hz
AQ       3.9976959 sec
RG       101
DM       61.000 usec
DE       11.00 usec
TE       300.2 K
D1       1.00000000 sec
D11      0.00000000 sec
TD0      400.2724717 MHz
NUC1     1H
PC       2.15 usec
P1       24.00000000 W
PC1      24.00000000 W

F2 - Processing parameters
SI       65536
SF       400.270088 MHz
WDW      EM
SSB      0
LB       0.30 Hz
GB       0
PC       1.00
  
```

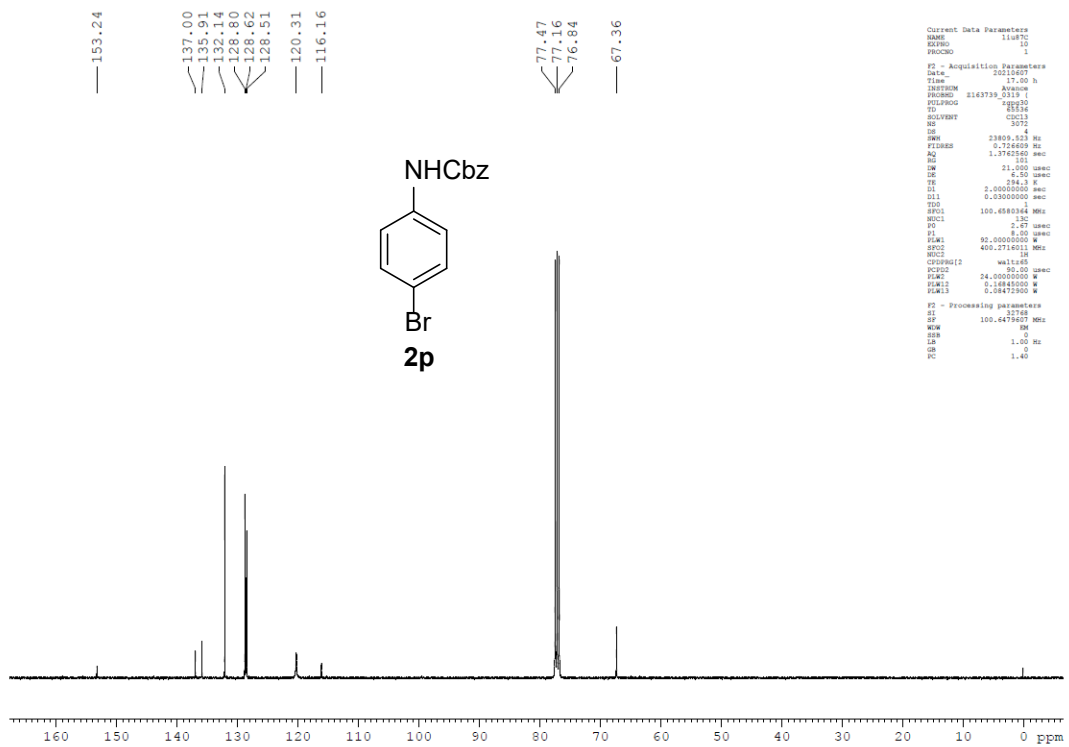

```

Current Data Parameters
NAME      116773
EXPNO    10
PROCNO   1

F2 - Acquisition Parameters
Date_    20110707
Time     17.00 h
INSTRUM  Avance
PROBHD   1H3139_0319
PULPROG  zgpg30
TD       65536
SOLVENT  CDCl3
NS       4
DS       16
SWH      23800.107 Hz
FIDRES   0.726609 Hz
AQ       1.1762540 sec
RG       101
DM       21.000 usec
DE       6.50 usec
TE       300.2 K
D1       2.00000000 sec
D11      0.00000000 sec
TD0      100.628364 MHz
NUC1     13C
PC       2.87 usec
P1       6.00000000 W
PC1      6.00000000 W
SFO1     100.628364 MHz
SFO2     400.2714501 MHz
CPCPRG2  wait4
NUC2     13C
PC2      24.00000000 W
PC12     0.08480000 W
PC13     0.08473000 W

F2 - Processing parameters
SI       65536
SF       100.627907 MHz
WDW      EM
SSB      0
LB       1.00 Hz
GB       0
PC       1.40
  
```



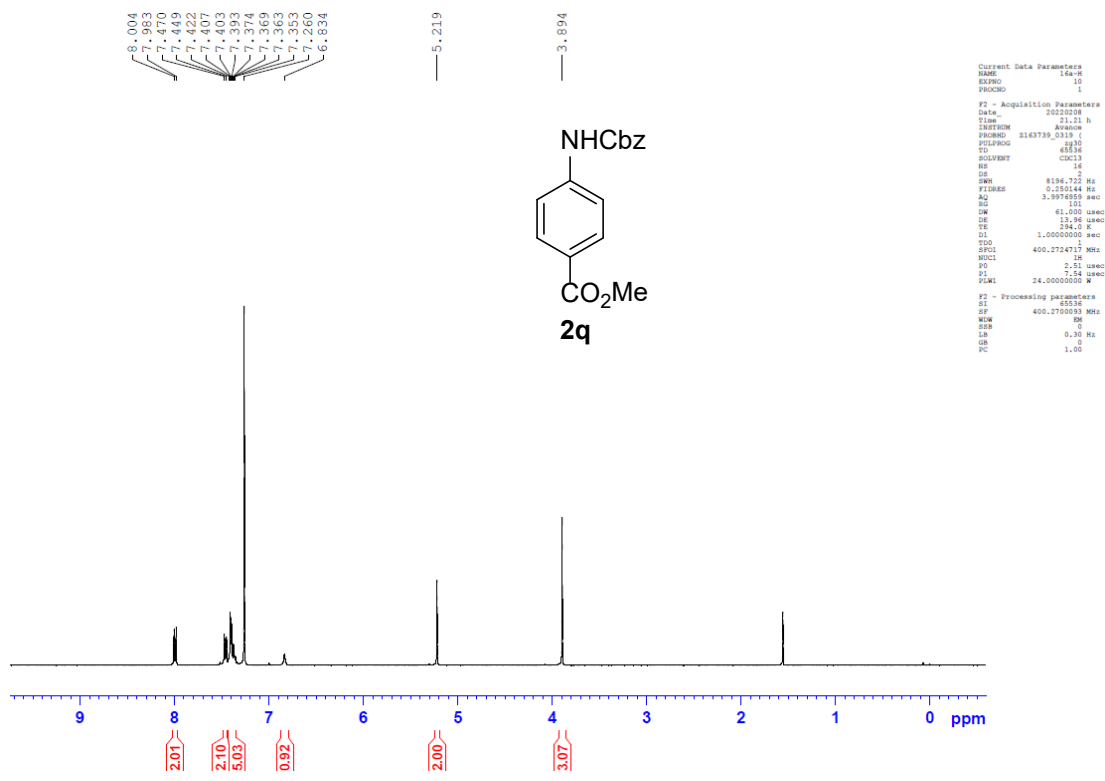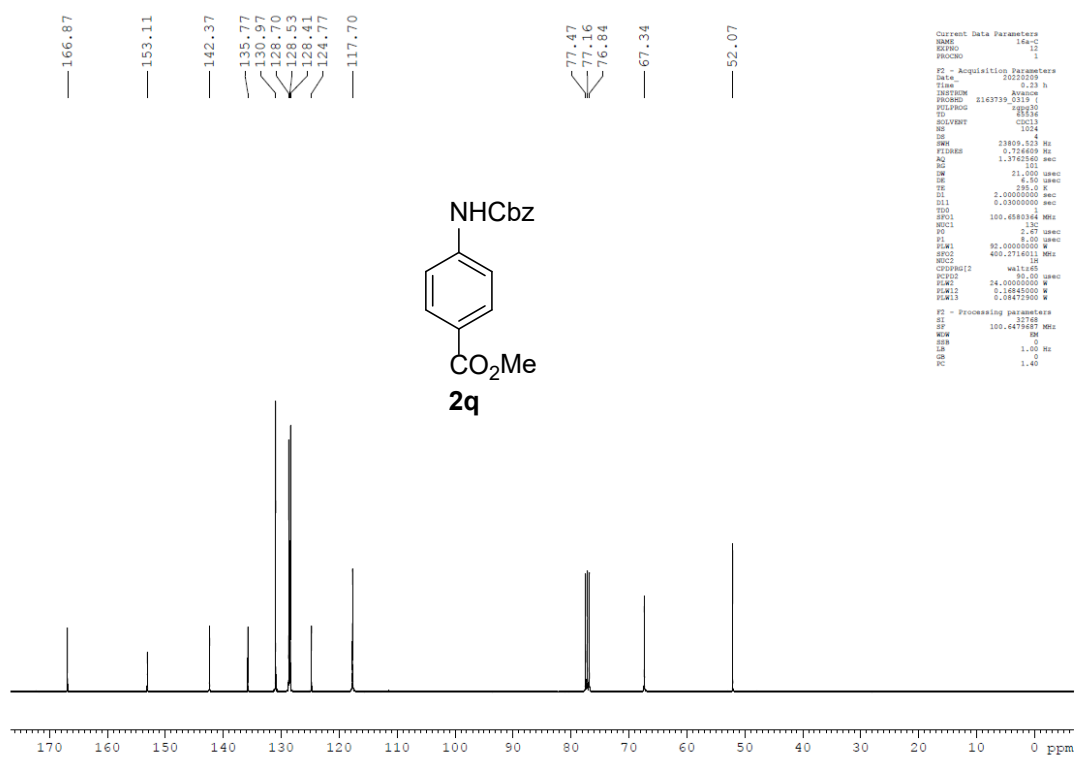

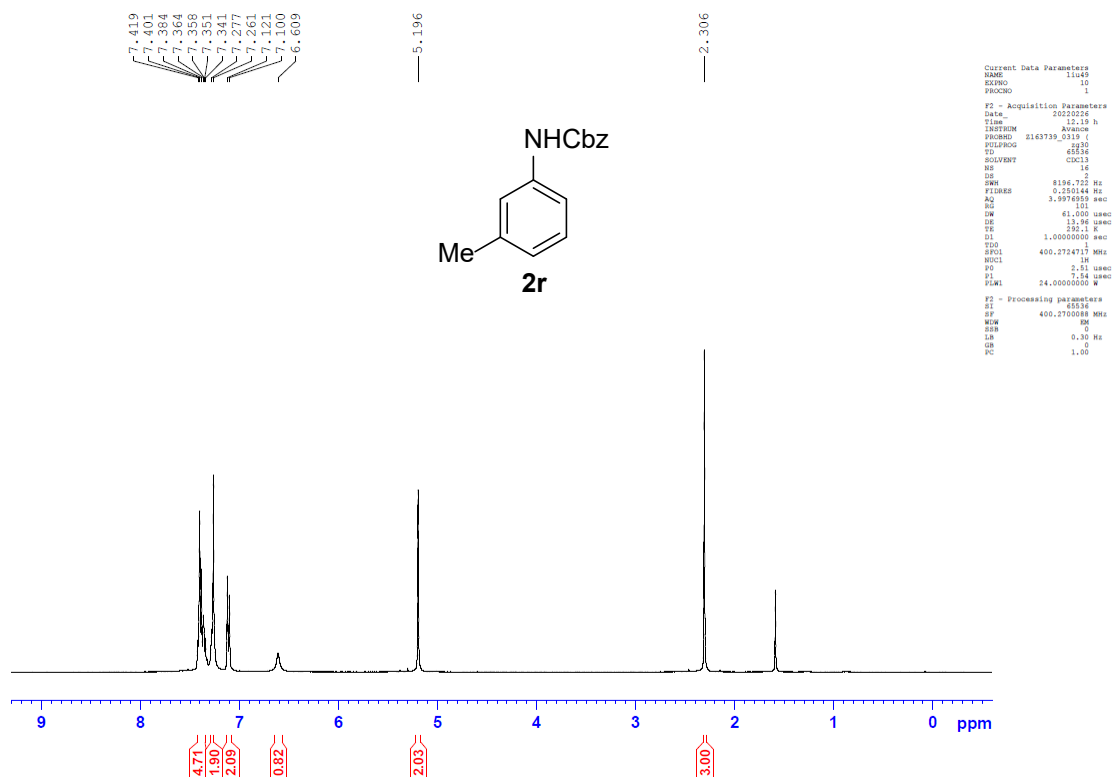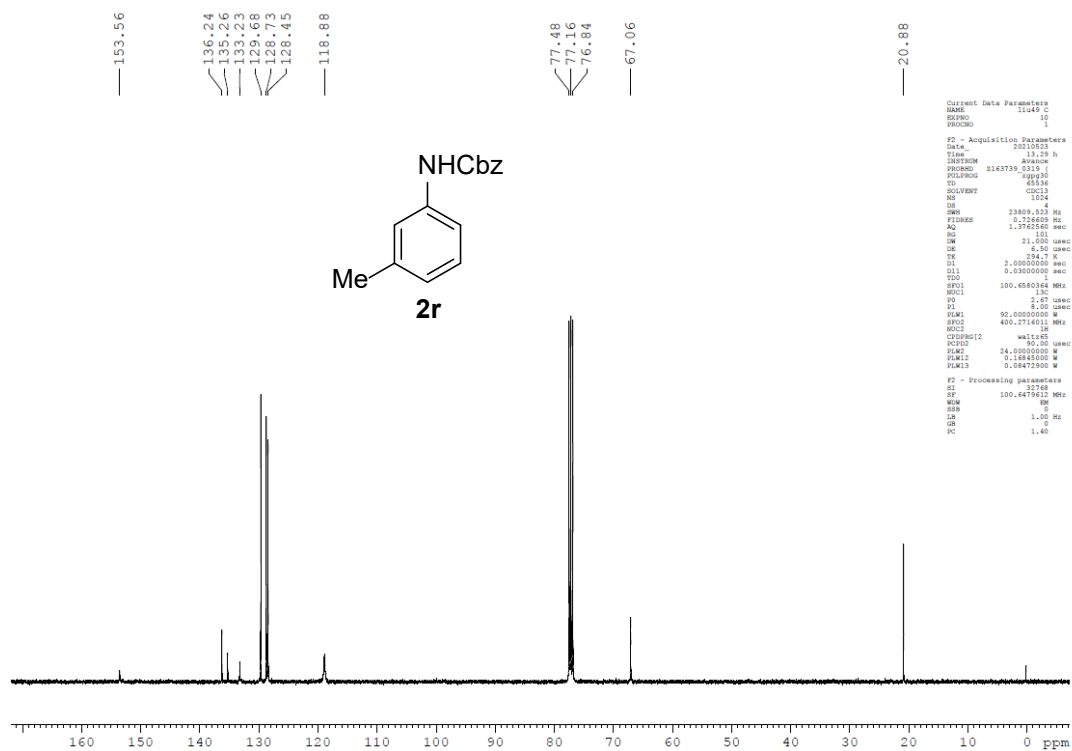

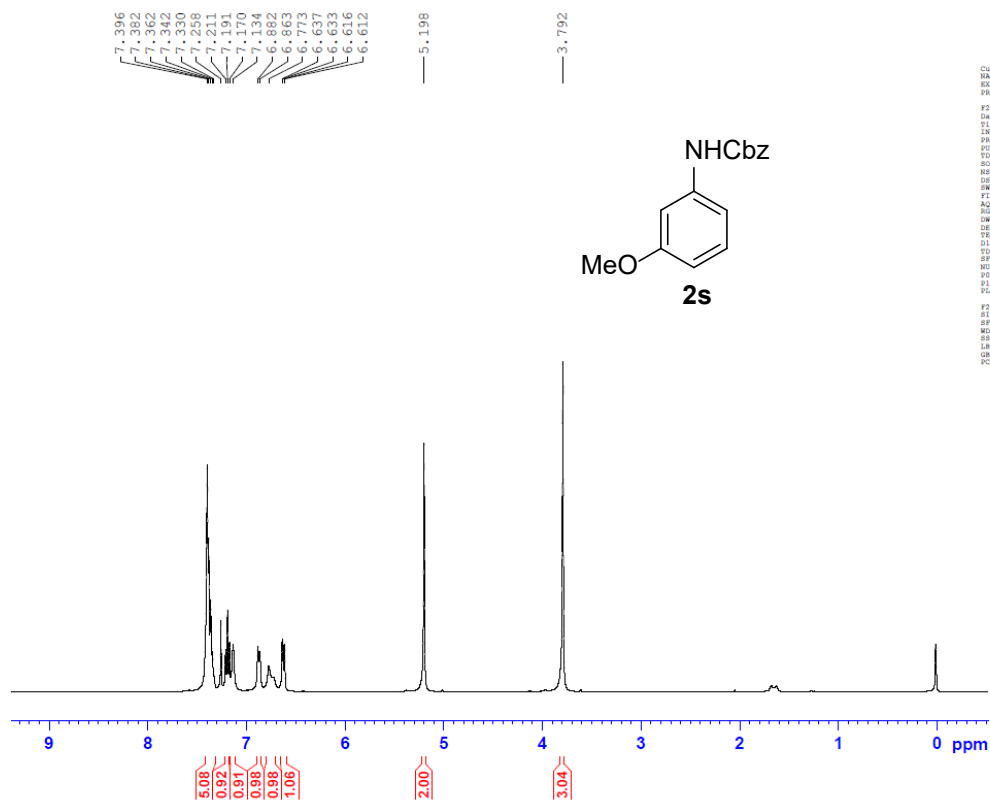

```

Current Data Parameters
NAME 1148 R
EXPNO 10
PROCNO 1
F2 - Acquisition Parameters
Date_ 20210522
Time 13.33 h
INSTRUM Avance
PROBHD 1H3139_0131 (
PULPROG zgpg30
TD 65536
SOLVENT CDCl3
NS 4
DS 4
SWH 8196.722 Hz
FIDRES 0.350144 Hz
AQ 3.1978555 sec
RG 99.1202
AW 61.000 usec
DE 13.96 usec
TE 300.2 K
D1 1.00000000 sec
TSD
SFO1 400.274717 MHz
NUC1 1H
P1 2.51 usec
PI 1.54 usec
PC 24.0000000 W
F2 - Processing parameters
SI 32768
SF 400.274717 MHz
WDW EM
SSB 0
LB 0.30 Hz
GB 0
PC 1.40
  
```

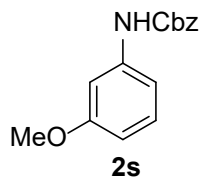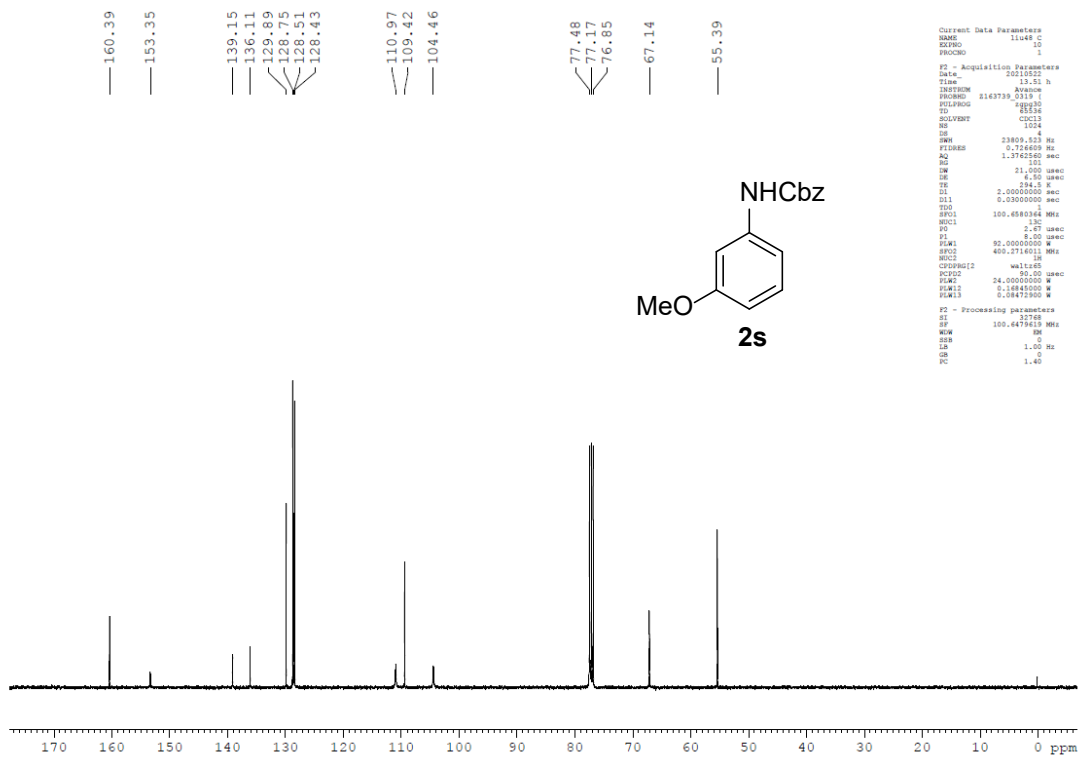

```

Current Data Parameters
NAME 1148 R
EXPNO 10
PROCNO 1
F2 - Acquisition Parameters
Date_ 20210522
Time 13.33 h
INSTRUM Avance
PROBHD 1H3139_0131 (
PULPROG zgpg30
TD 65536
SOLVENT CDCl3
NS 4
DS 4
SWH 23809.523 Hz
FIDRES 0.726209 Hz
AQ 1.3762580 sec
RG 21.000 usec
AW 6.00 usec
DE 394.5 K
D1 2.00000000 sec
D11 0.03000000 sec
TSD
SFO1 100.626114 MHz
NUC1 13C
P1 1.32 usec
PI 2.47 usec
PC 24.0000000 W
SFO2 400.2716011 MHz
NUC2 1H
CPDPRG2 waltz165
PCPD 90.00 usec
PCPD2 24.0000000 W
PCPD3 0.1844500 W
PCPD4 0.0847300 W
F2 - Processing parameters
SI 32768
SF 100.626114 MHz
WDW EM
SSB 0
LB 1.00 Hz
GB 0
PC 1.40
  
```

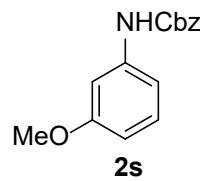

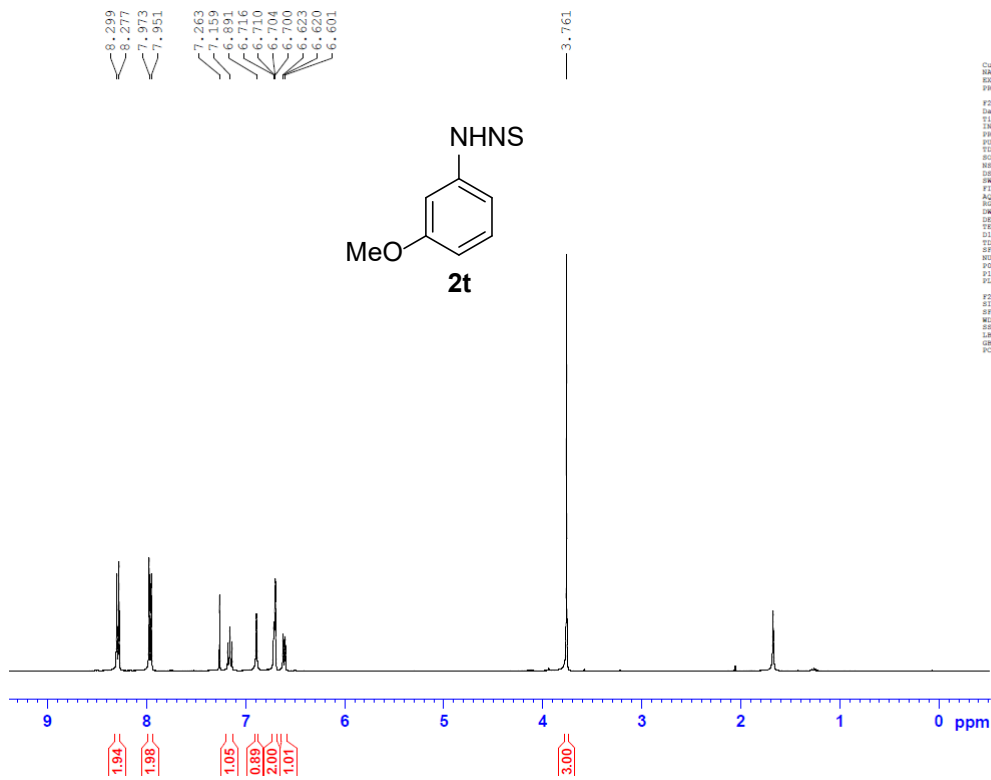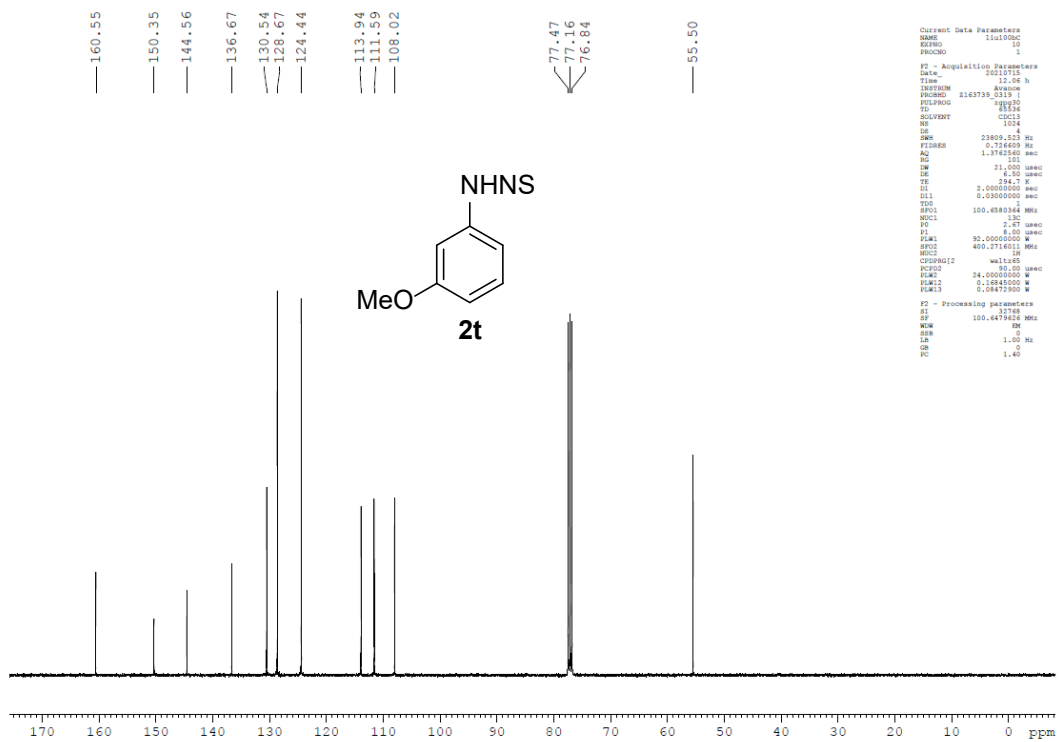

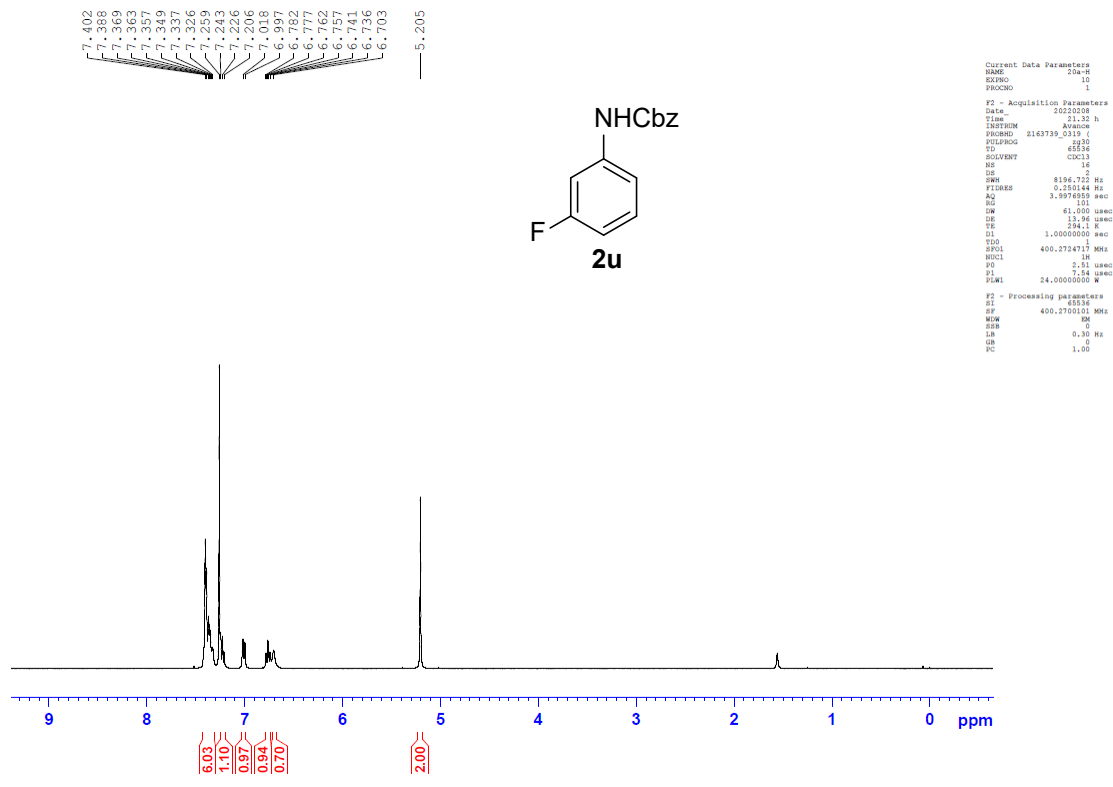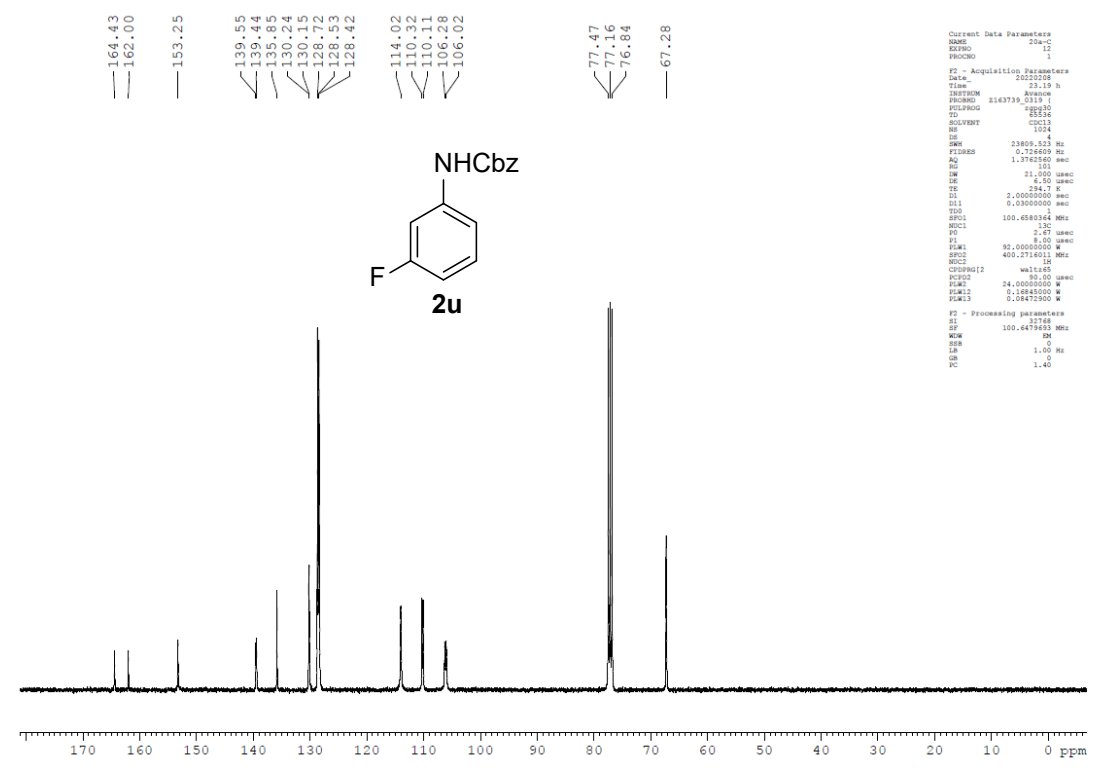

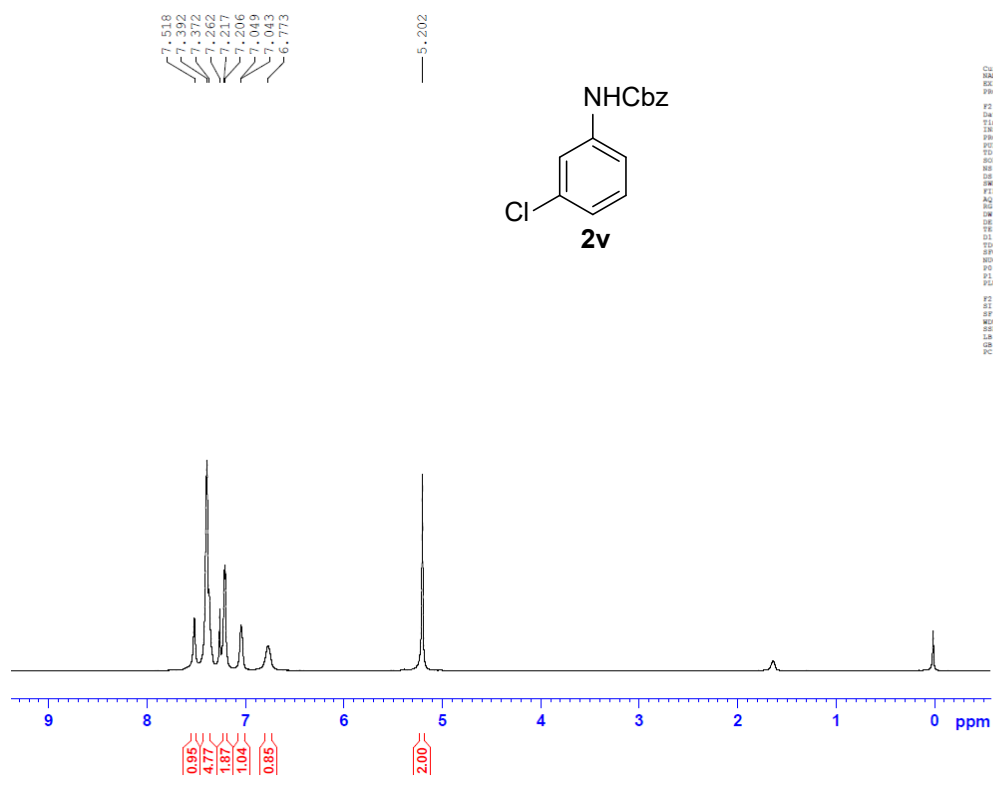

```

Current Data Parameters
NAME      11u50 R
EXPNO    10
PROCNO   1
F2 - Acquisition Parameters
Date_    20110513
Time     11.04 h
INSTRUM  Avance
PROCNO   2163739_0319 (
PULPROG  zgpg30
RG       651.00
SI       327.50
SOLVENT  CDCl3
DS       4
DE       2
SWH      8196.712 Hz
FIDRES   0.350144 Hz
AQ       3.9976889 sec
RG       101
WDW      EM
SSB      0.000000 sec
DE       13.96 usec
TE       293.0 K
D1       1.00000000 sec
TD       1
SFO1     400.274717 MHz
RG1      1
PC       2.51 usec
PI       7.14 usec
PLM1     24.0000000 W
F2 - Processing parameters
SI       327.50
SF       400.270084 MHz
WDW      EM
SSB      0.30 Hz
LB       0
GB       1.00
  
```

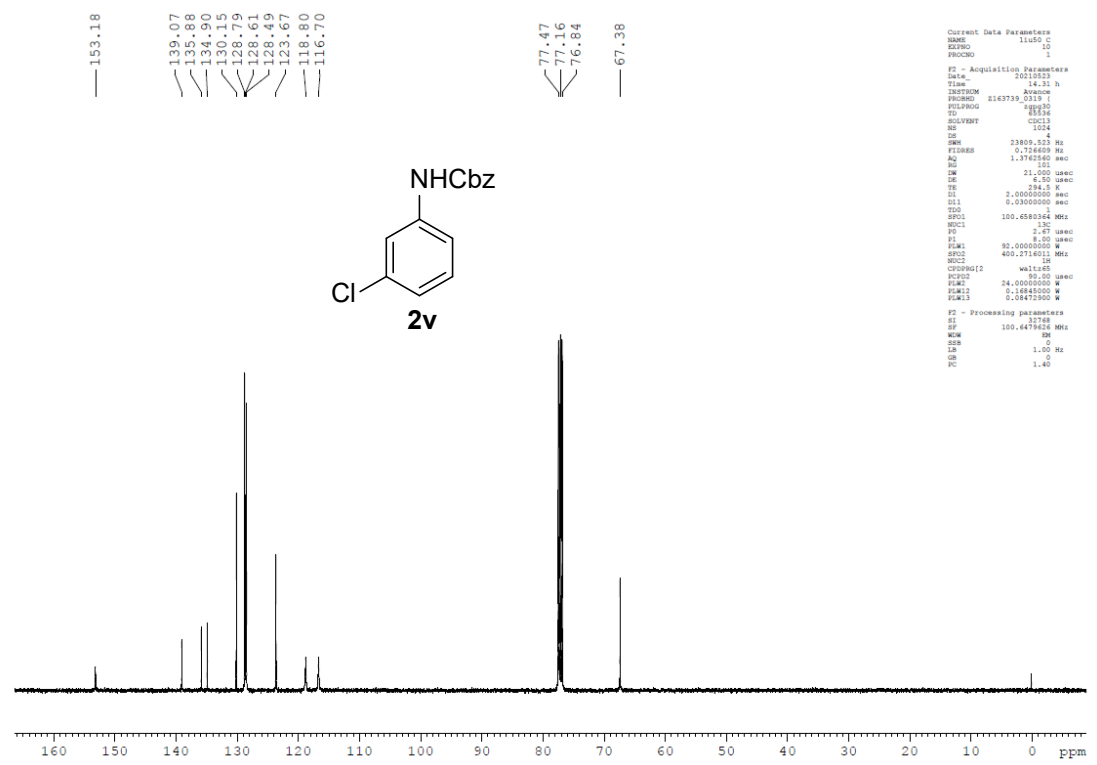

```

Current Data Parameters
NAME      11u50 C
EXPNO    10
PROCNO   1
F2 - Acquisition Parameters
Date_    20110513
Time     14.31 h
INSTRUM  Avance
PROCNO   2163739_0319 (
PULPROG  zgpg30
RG       651.00
SI       327.50
SOLVENT  CDCl3
DS       4
DE       2
SWH      23809.503 Hz
FIDRES   0.724609 Hz
AQ       1.3742160 sec
RG       101
WDW      EM
SSB      0.000000 sec
DE       6.50 usec
TE       293.0 K
D1       2.00000000 sec
D11      0.00000000 sec
D12      0.00000000 sec
SFO1     100.6283264 MHz
RG1      1
PC       2.87 usec
PI       8.00 usec
PLM1     90.0000000 W
SFO2     400.2746011 MHz
CQXPWG12 waltzes
PCPD2    24.00000000 sec
PLM2     0.18445000 W
PLM3     0.18445000 W
PLM4     0.18445000 W
F2 - Processing parameters
SI       327.50
SF       100.6479428 MHz
WDW      EM
SSB      1.00 Hz
LB       0
GB       1.40
  
```



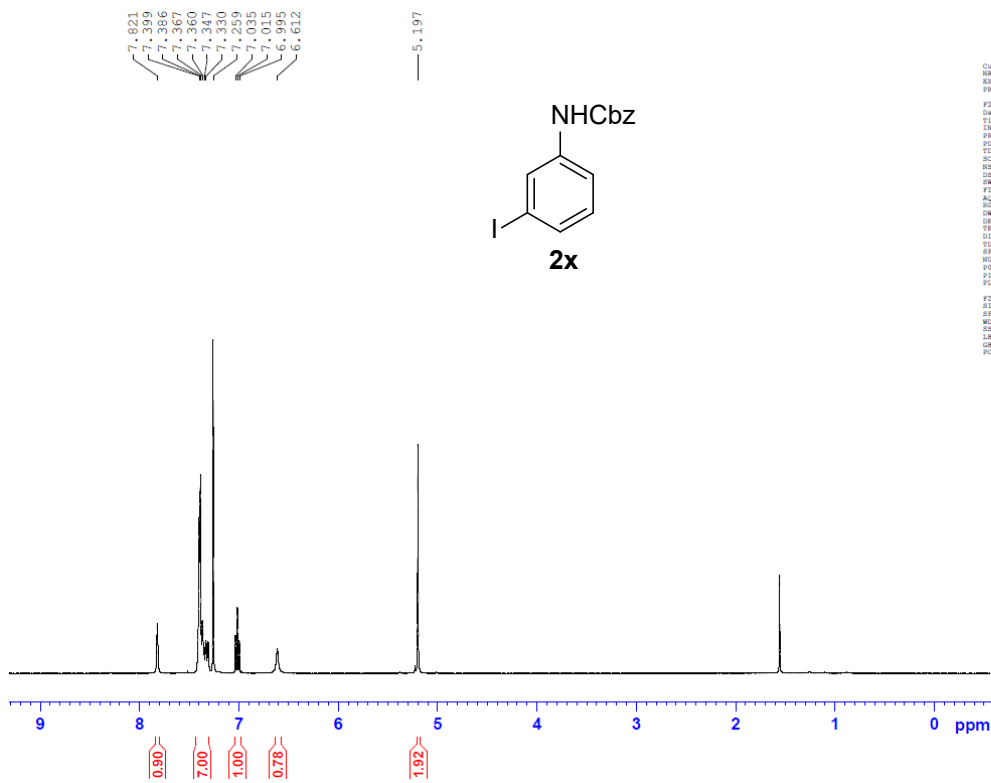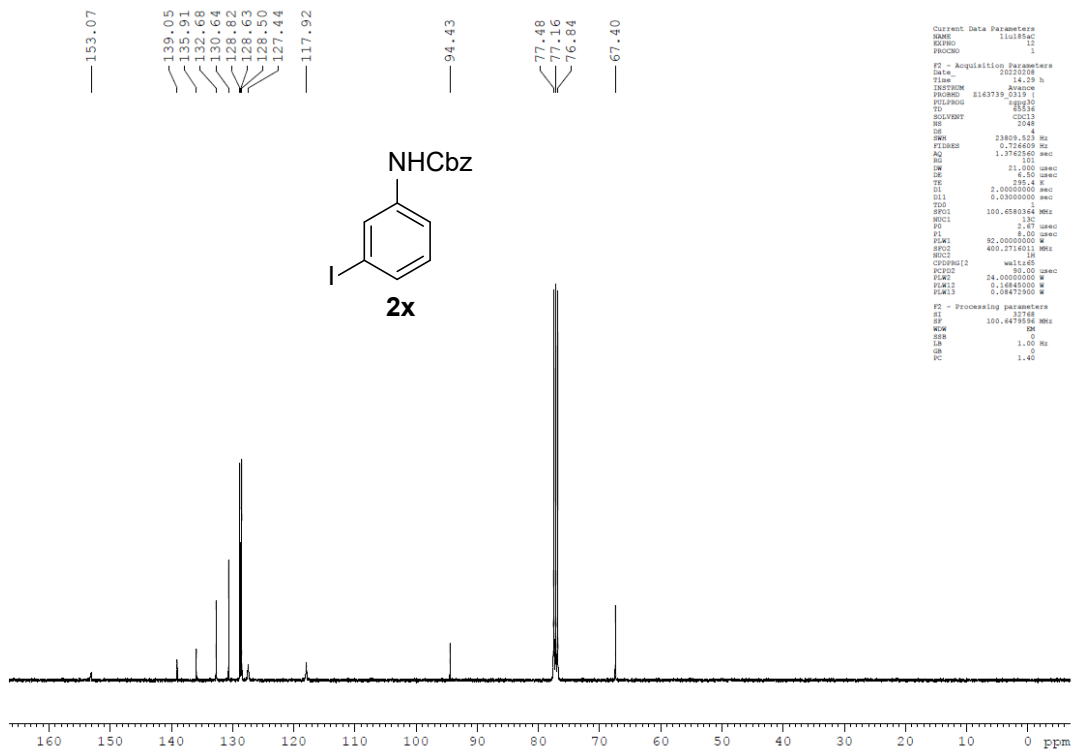



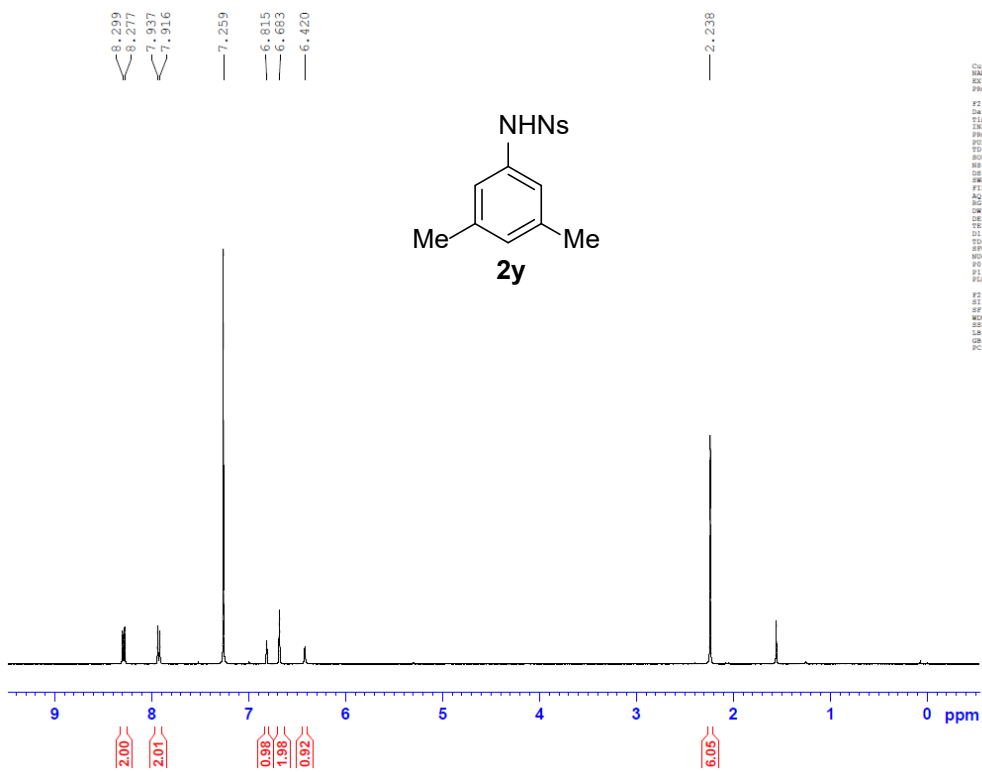

```

Current Data Parameters
NAME      2y-a-9
EXPNO    10
PROCNO   1
F2 - Acquisition Parameters
Date_    20220208
Time     12.00 h
INSTRUM  Avance
PROBHD   1H3139_0319 (
PULPROG zgpg30
TD        65536
SOLVENT  CDCl3
NS        14
DS        2
SWH       8196.722 Hz
FIDRES    0.255144 Hz
AQ        3.9974855 sec
RG         101
DM        61.000 usec
DE        12.26 usec
TE        298.1 K
D1        1.0000000 sec
D11       0.0300000 sec
D12       0.0300000 sec
SFO1      400.2724717 MHz
NUC1      1H
PC        2.81 usec
P1        9.14 usec
PL1       24.0000000 W
F2 - Processing parameters
SI        65536
SF        400.2700099 MHz
RG        101
SFR       0.30 Hz
AQ        1.00
PC        1.00
  
```

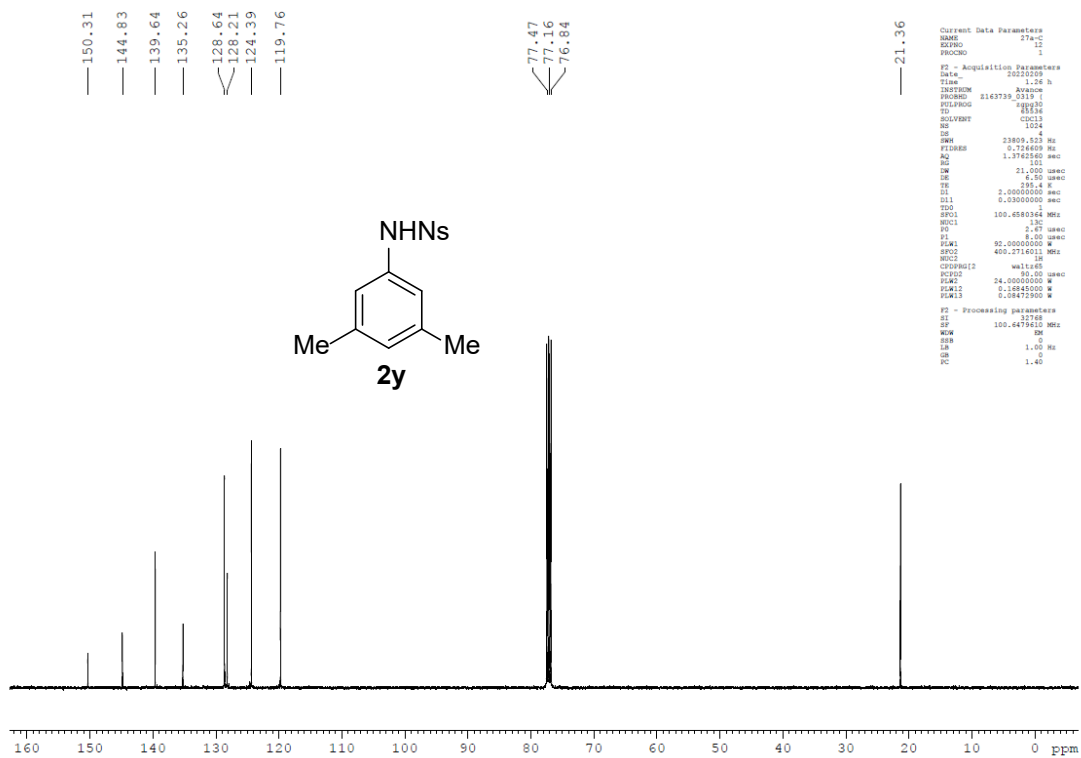

```

Current Data Parameters
NAME      2y-a-9
EXPNO    10
PROCNO   1
F2 - Acquisition Parameters
Date_    20220209
Time     1.26 h
INSTRUM  Avance
PROBHD   1H3139_0319 (
PULPROG zgpg30
TD        65536
SOLVENT  CDCl3
NS        1024
DS        2
SWH       23809.623 Hz
FIDRES    0.724600 Hz
AQ        1.3742361 sec
RG         101
DM        21.000 usec
DE        4.80 usec
TE        298.4 K
D1        2.0000000 sec
D11       0.0300000 sec
D12       0.0300000 sec
SFO1      100.6260364 MHz
NUC1      13C
PC        2.47 usec
P1        8.00 usec
PL1       92.0000000 W
PL2       400.2714611 MHz
SFO2      400.2714611 MHz
CPDPRG2  waltz16
NUC2      1H
D122     24.0000000 sec
PL12     24.0000000 W
PL13     0.1084000 W
PL14     0.0847300 W
F2 - Processing parameters
SI        65536
SF        100.6278610 MHz
RG        101
SFR       1.00 Hz
AQ        1.00
PC        1.40
  
```

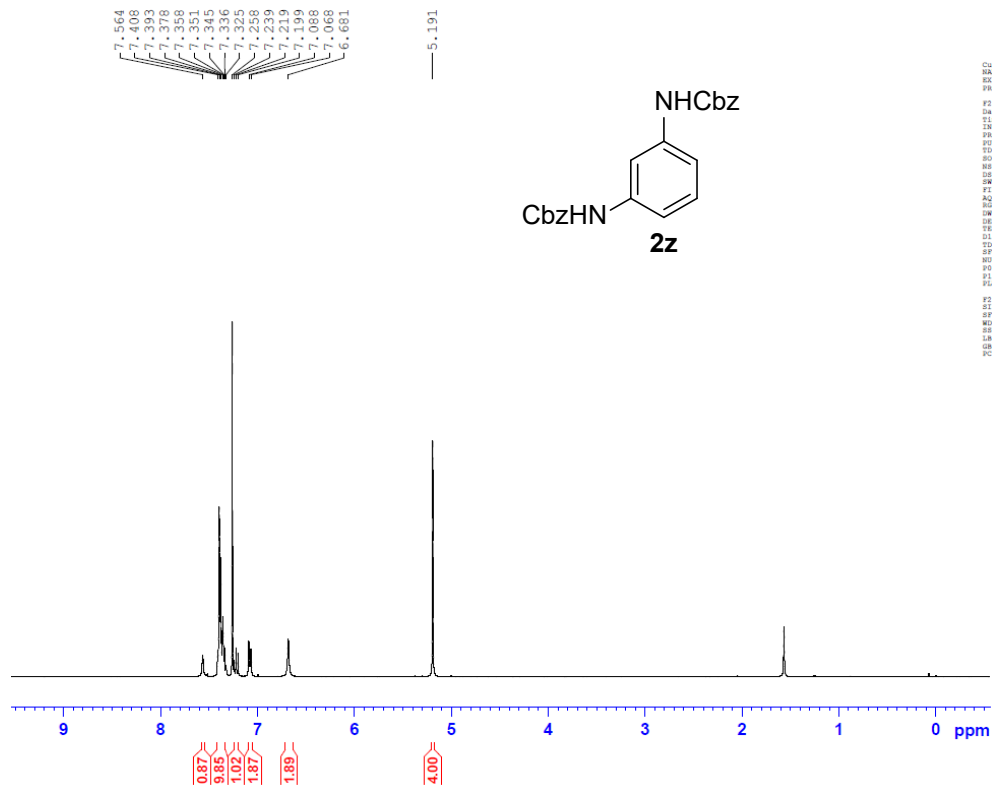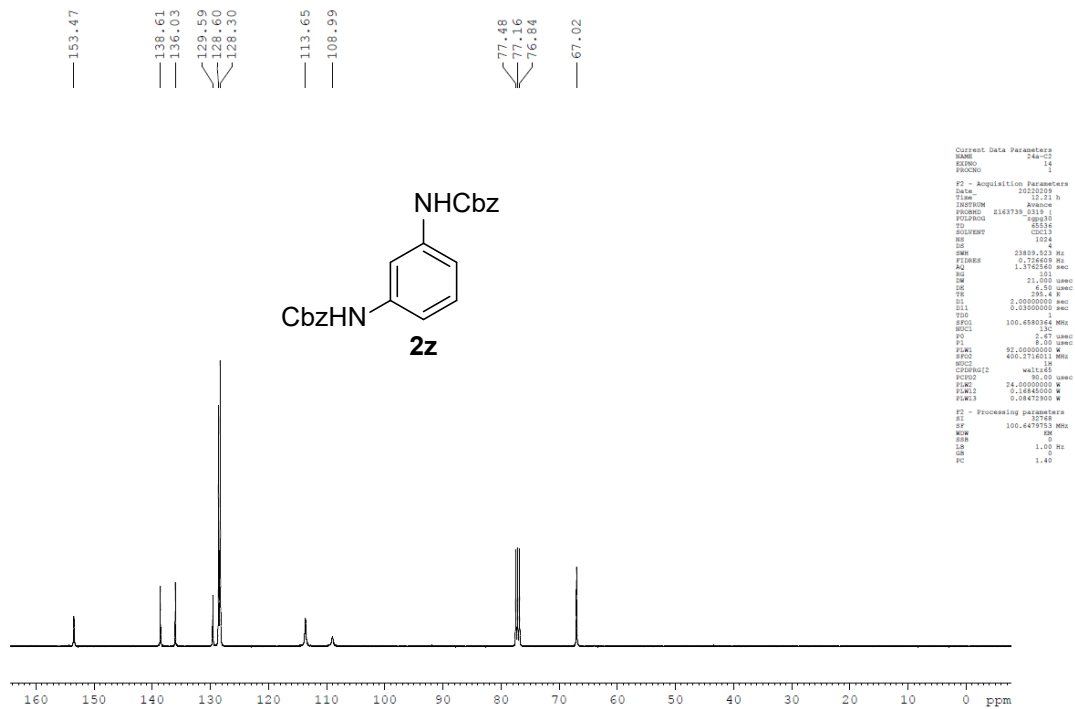

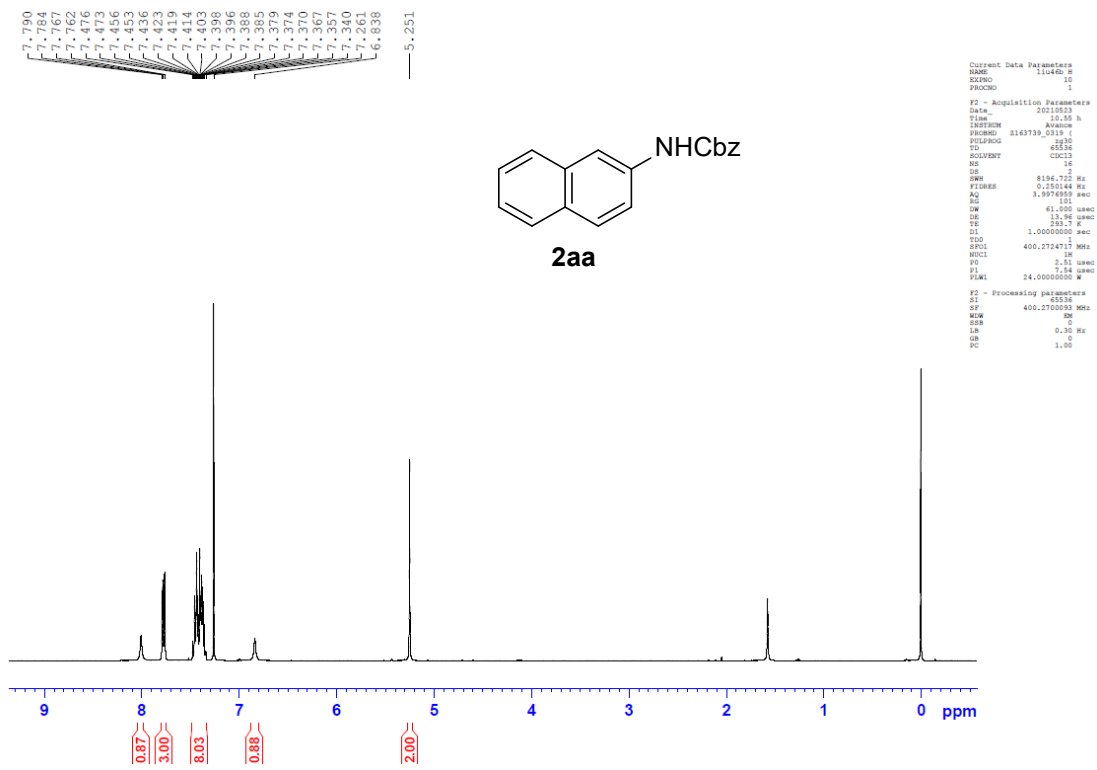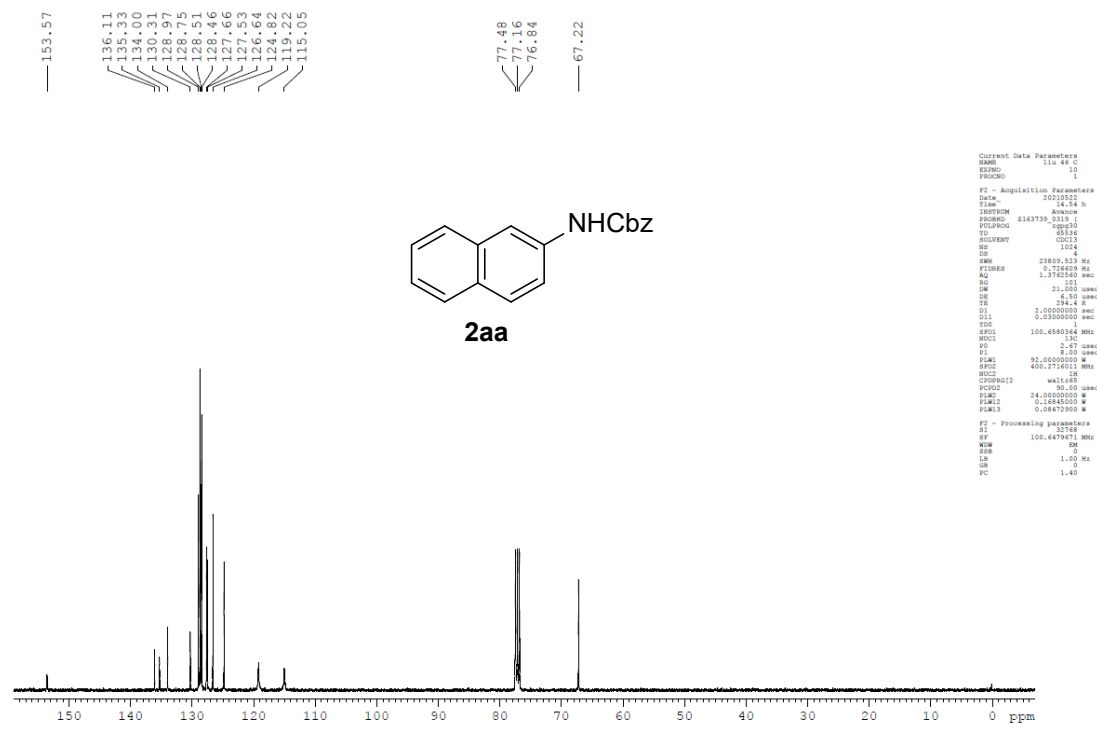

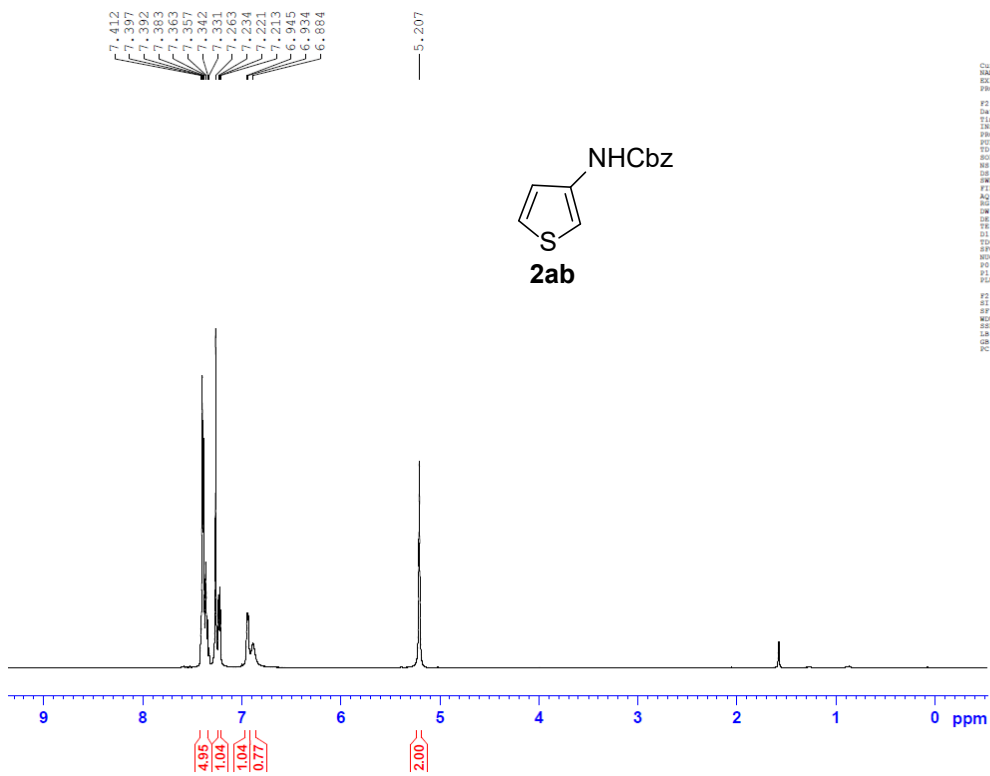

```

Current Data Parameters
NAME      11u11-4
EXPNO    10
PROCNO   1
F2 - Acquisition Parameters
Date_    20230509
Time     13.05 h
INSTRUM  Avance
PROBHD   11c739_0319 f
PULPROG  zgpg30
SOLVENT  CDCl3
NS       16
DS       4
SWH      8194.325 Hz
FIDRES   0.350144 Hz
AQ       3.8976000 sec
RG       101
RW       61.000 usec
DE       11.96 usec
TE       298.0 K
D1       1.0000000 sec
TSD
SFO1     400.2724717 MHz
WCL1     16
SI        1
SF        400.2724717 MHz
RG1       24.0000000 W
F2 - Processing Parameters
SI        16336
SF        400.2700265 MHz
WDW       EM
SSB       0
LB        0.30 Hz
GB        0
PC        1.00
  
```

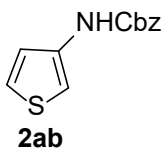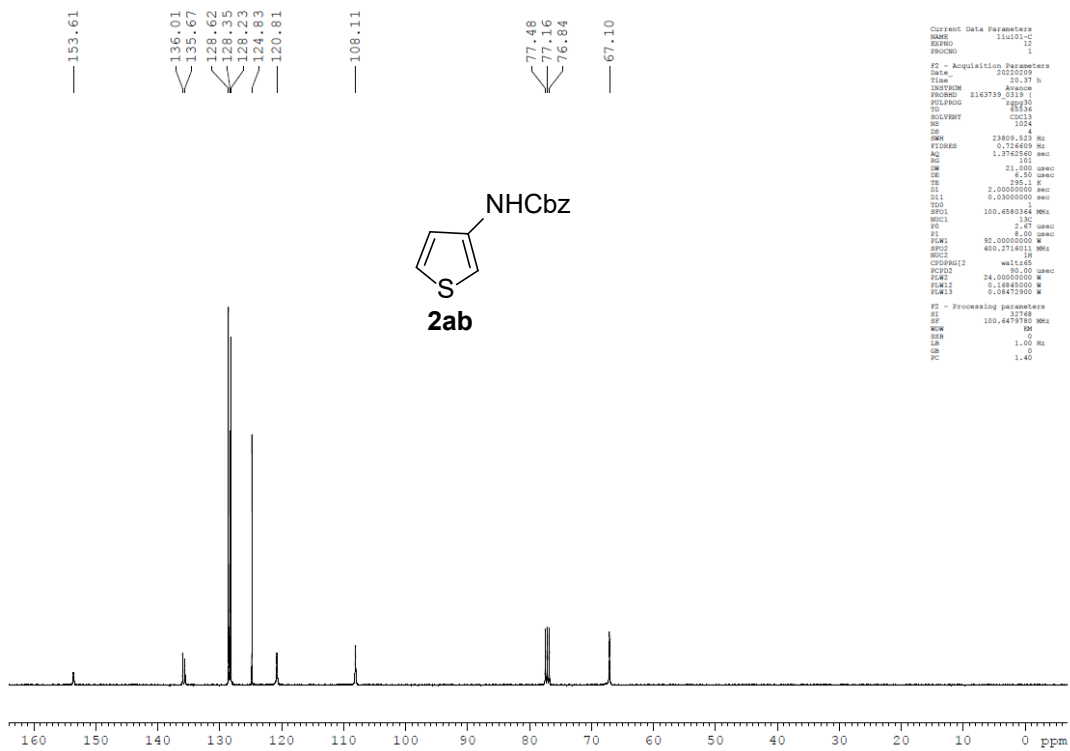

```

Current Data Parameters
NAME      11u11-4
EXPNO    10
PROCNO   1
F2 - Acquisition Parameters
Date_    20230509
Time     20.37 h
INSTRUM  Avance
PROBHD   11c739_0319 f
PULPROG  zgpg30
SOLVENT  CDCl3
NS       16
DS       4
SWH      23800.103 Hz
FIDRES   0.726609 Hz
AQ       1.3762500 sec
RG       101
RW       21.000 usec
DE       6.50 usec
TE       298.1 K
D1       2.0000000 sec
D11      0.0300000 sec
TSD
SFO1     100.6261364 MHz
WCL1     16
SI        1
SF        100.6261364 MHz
RG1       24.0000000 W
F2 - Processing Parameters
SI        16336
SF        100.6247978 MHz
WDW       EM
SSB       0
LB        1.00 Hz
GB        0
PC        1.40
  
```

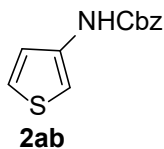

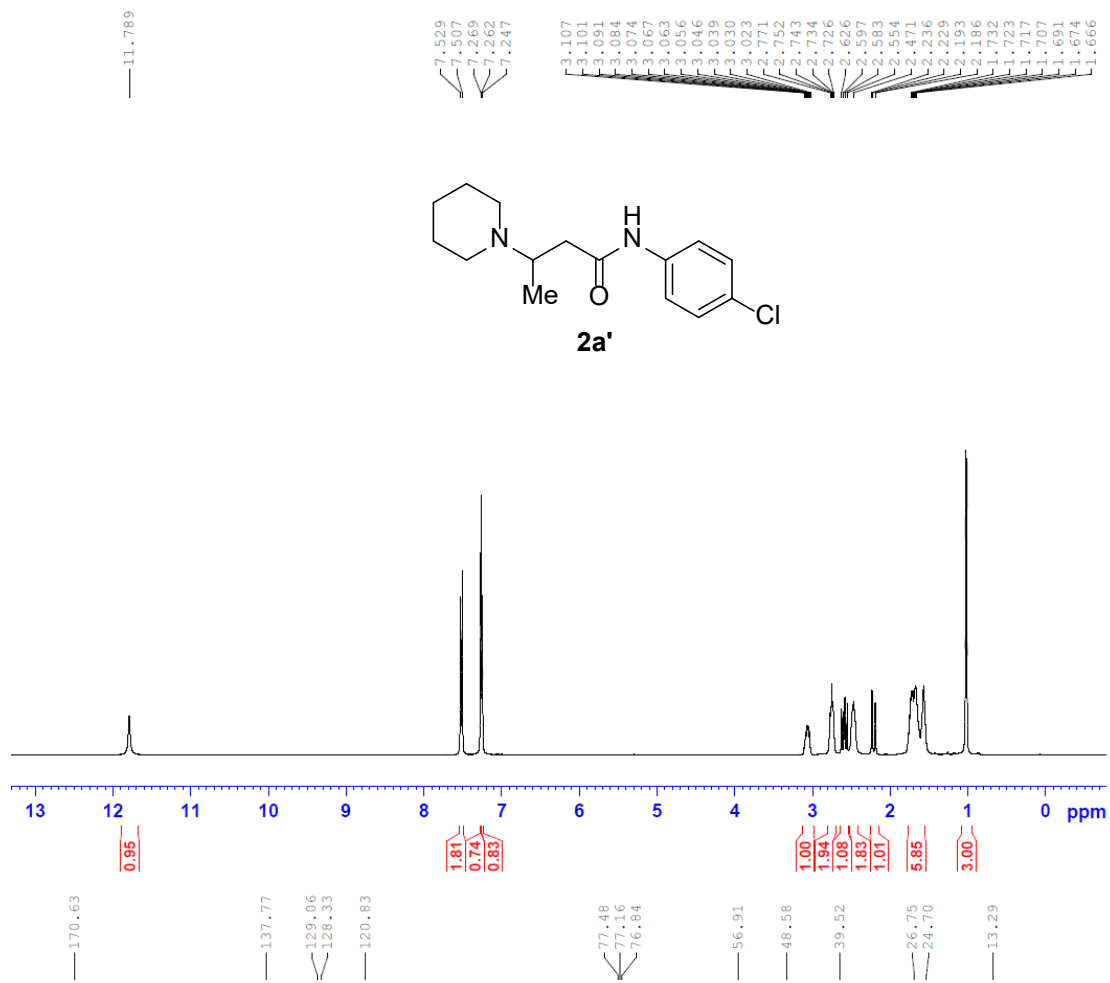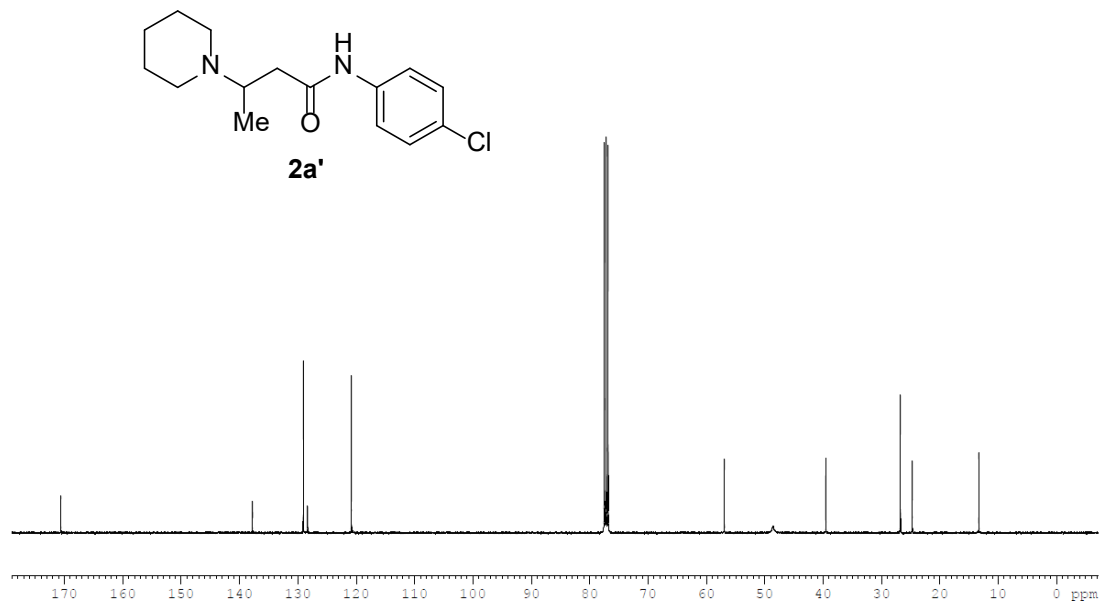

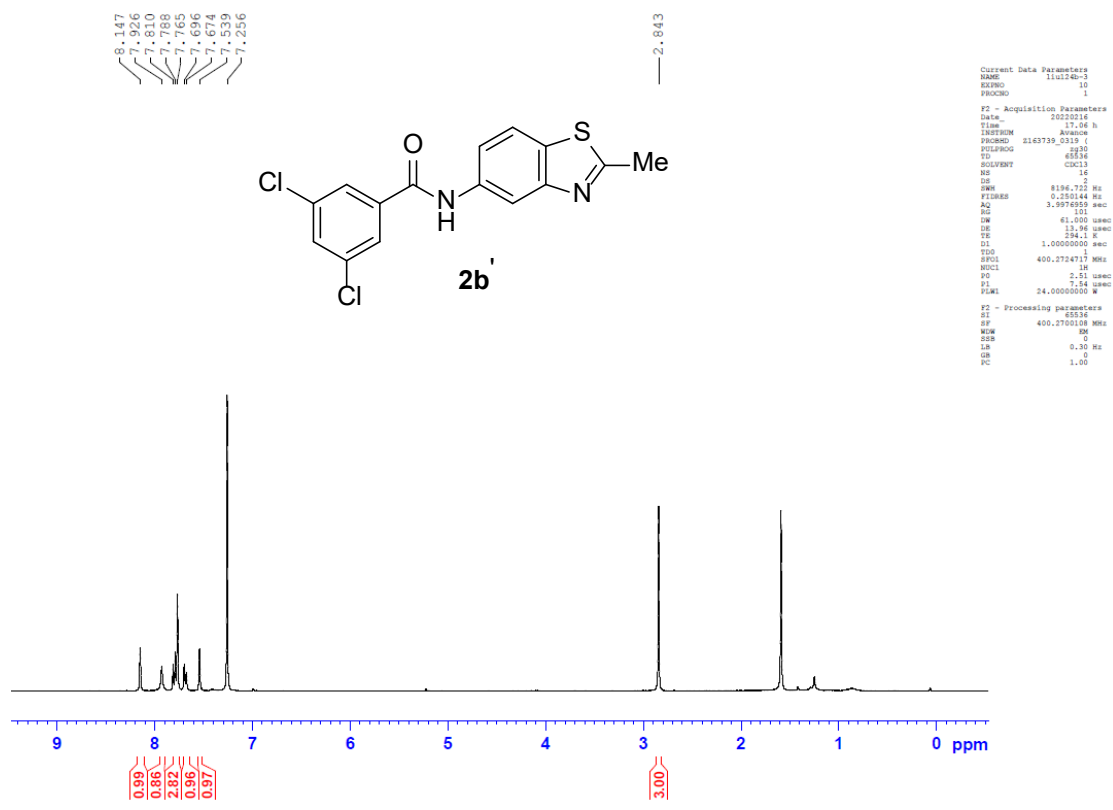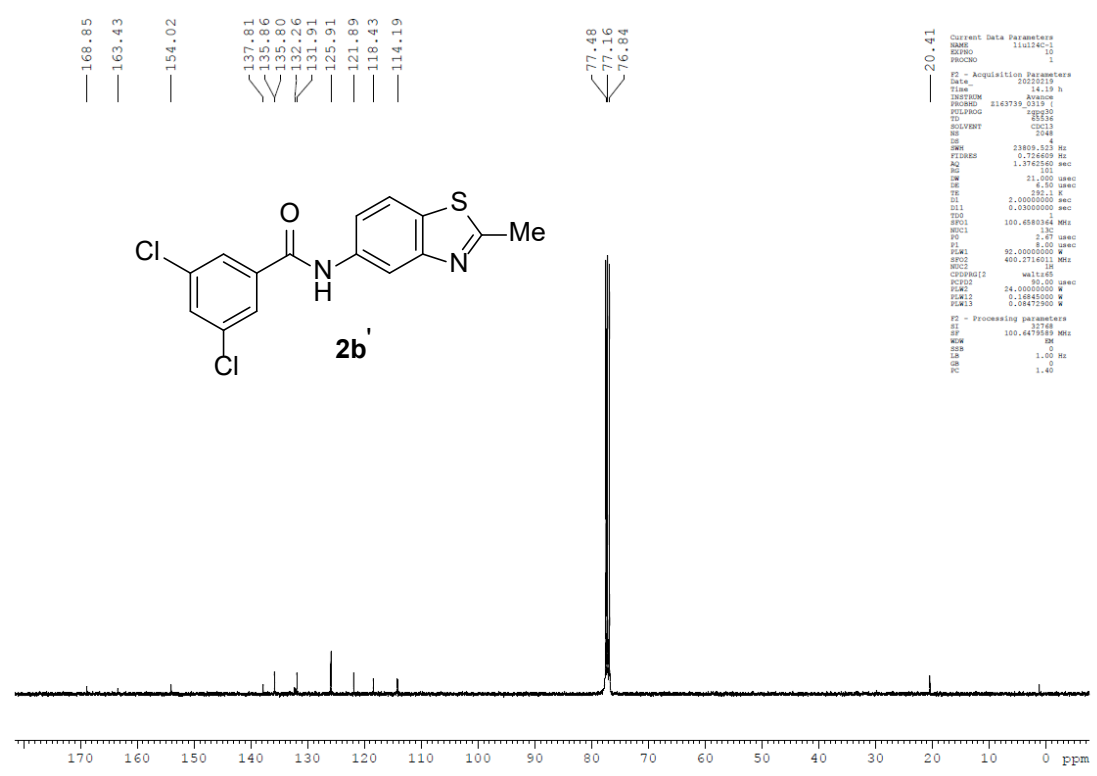

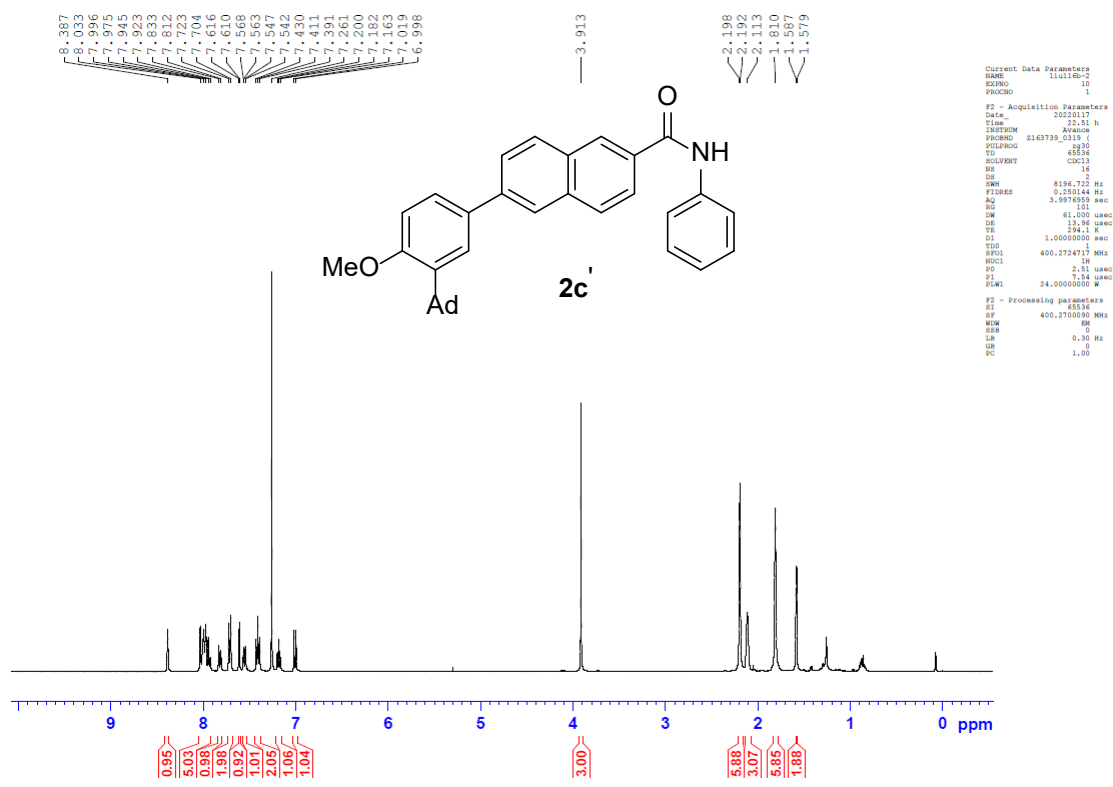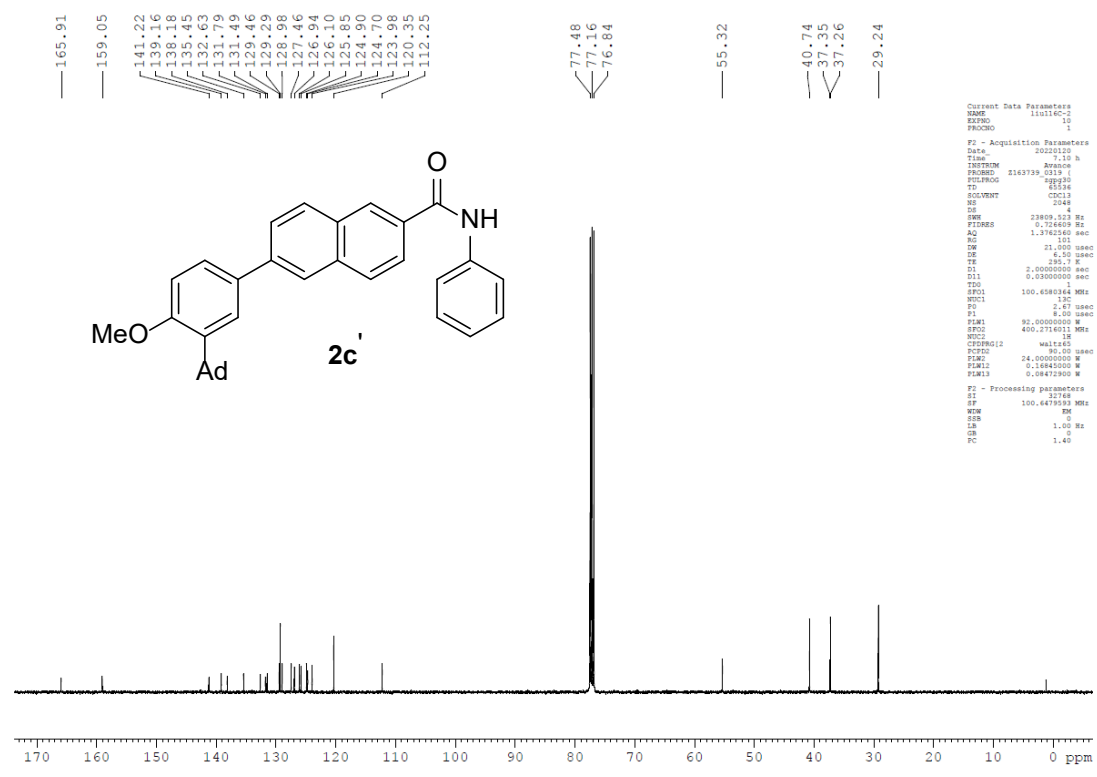

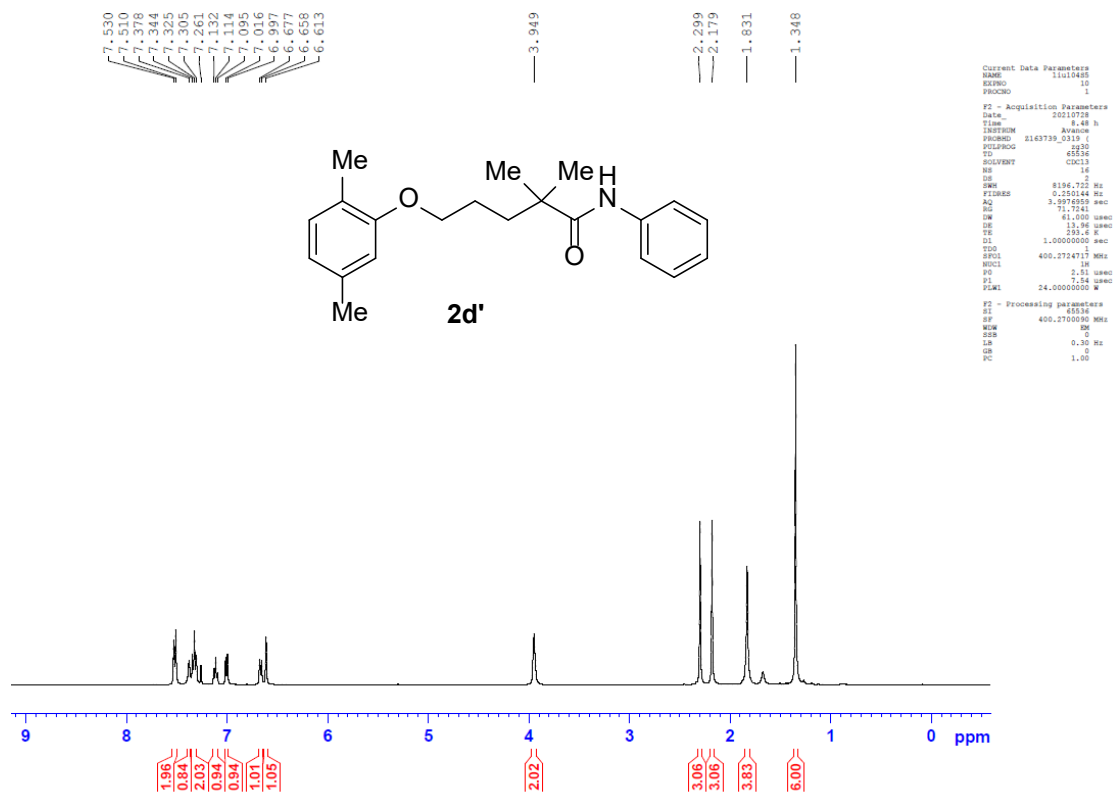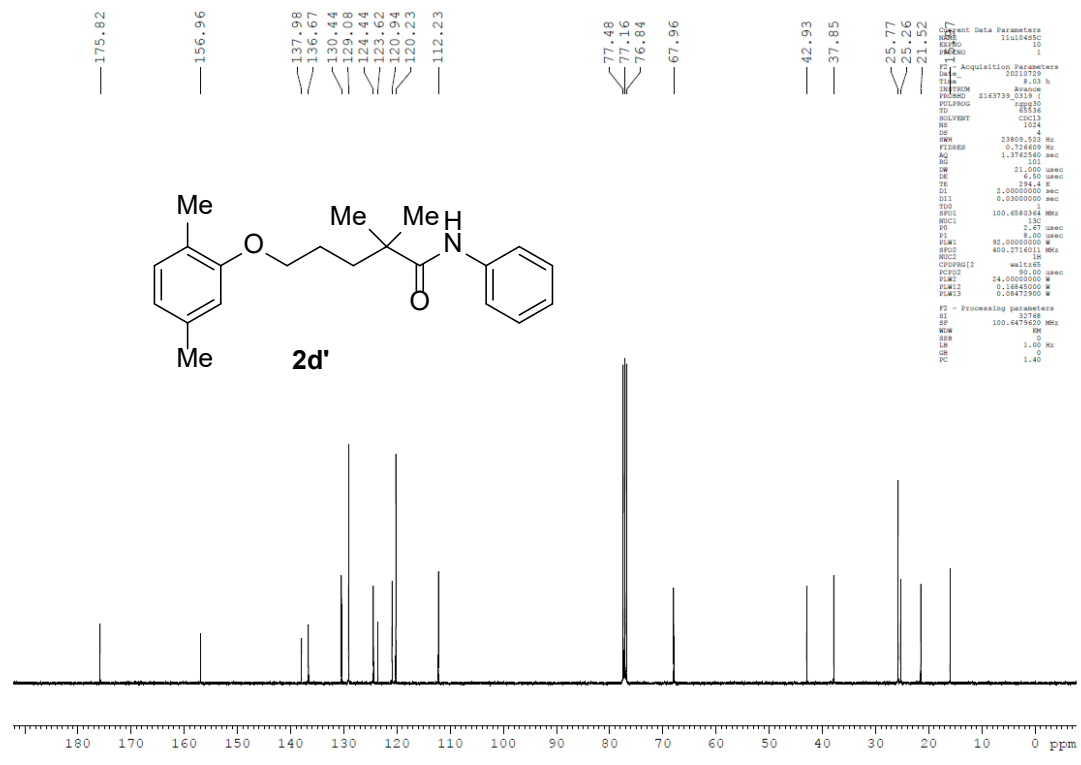



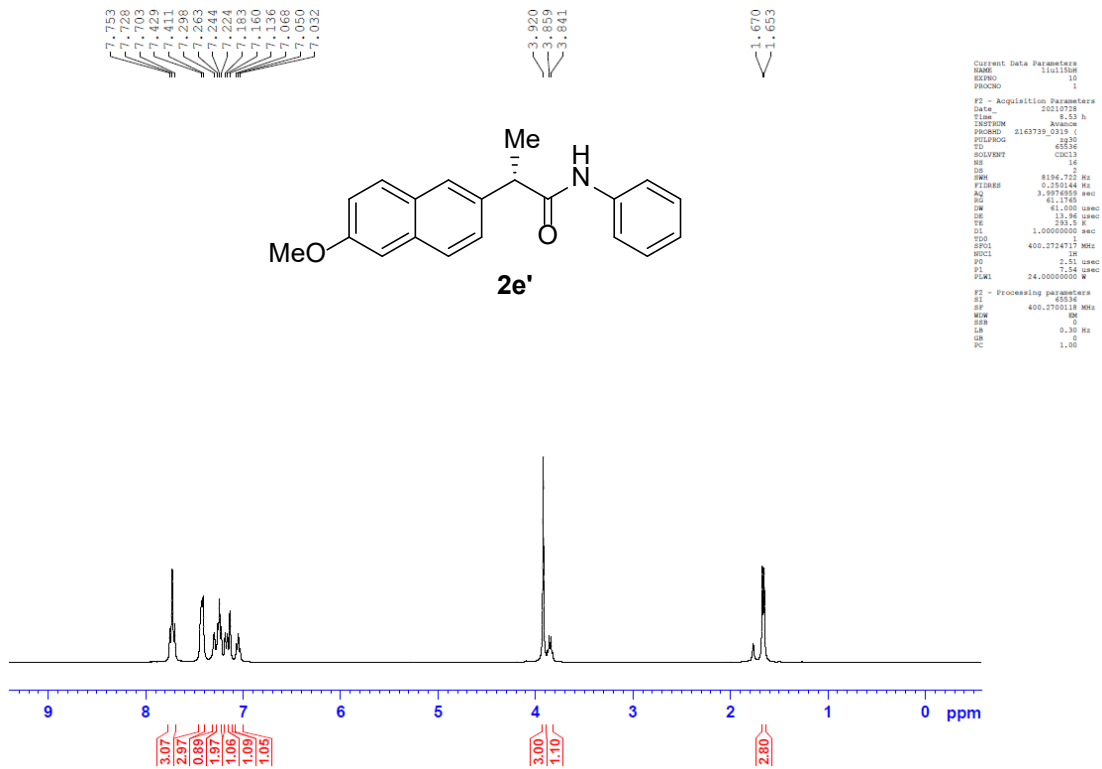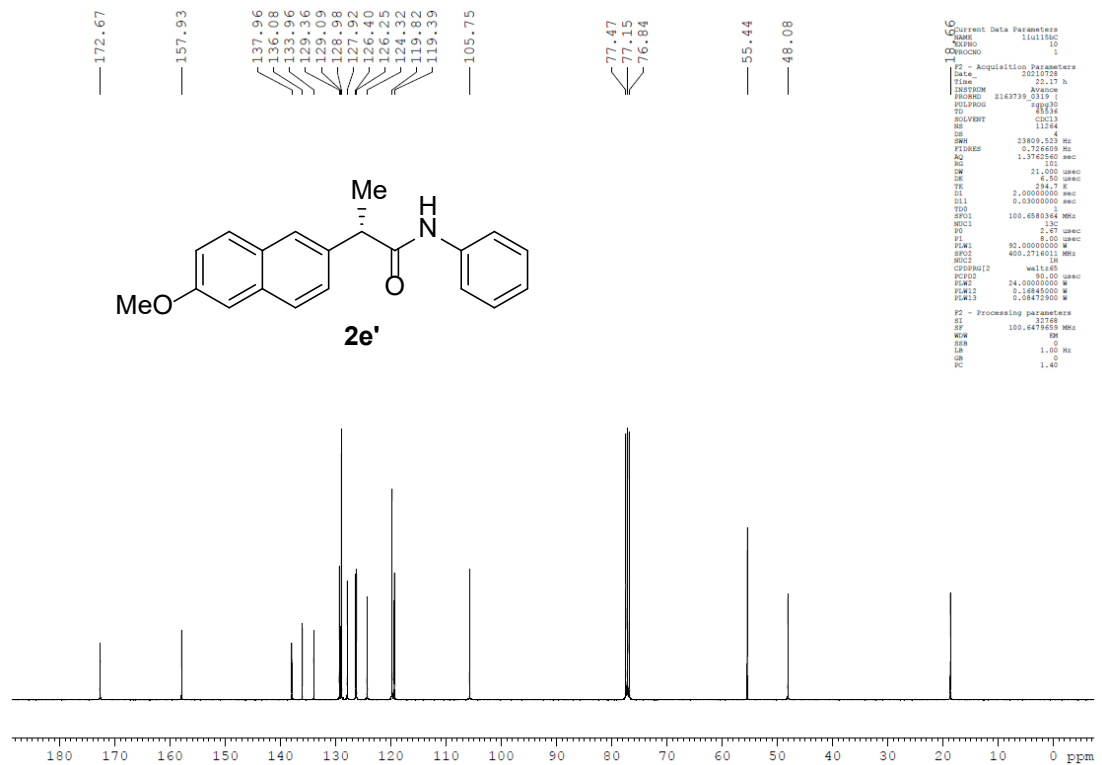

7.461  
7.441  
7.300  
7.280  
7.267  
7.262  
7.182  
7.162  
7.100  
7.081  
7.063

3.752  
3.734  
3.716  
3.699

2.506  
2.489  
1.924  
1.907  
1.890  
1.873  
1.857  
1.837  
1.819  
1.599  
0.945  
0.929

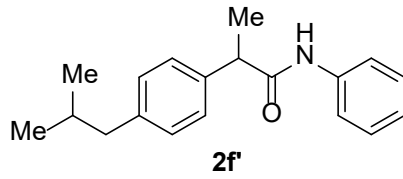

```

Current Data Parameters
NAME          11158-1
EXPNO        12
PROCNO       1
F2 - Acquisition Parameters
Date_         2011018
Time          19.51 h
INSTRUM      Avance
PROBHD       2163739_0319 T
PULPROG      zgpg30
TD            65536
SOLVENT      CDCl3
NS            2
DS            4
SWH           8196.722 Hz
FIDRES       0.255144 Hz
AQ           3.8976939 sec
RG           50.7317
AQ           61.000 usec
DE           13.96 usec
TE           304.4 K
D1           1.00000000 sec
D11          0.1
D12          0.1
D13          0.1
D14          0.1
D15          0.1
D16          0.1
D17          0.1
D18          0.1
D19          0.1
D20          0.1
D21          0.1
D22          0.1
D23          0.1
D24          0.1
D25          0.1
D26          0.1
D27          0.1
D28          0.1
D29          0.1
D30          0.1
D31          0.1
D32          0.1
D33          0.1
D34          0.1
D35          0.1
D36          0.1
D37          0.1
D38          0.1
D39          0.1
D40          0.1
D41          0.1
D42          0.1
D43          0.1
D44          0.1
D45          0.1
D46          0.1
D47          0.1
D48          0.1
D49          0.1
D50          0.1
D51          0.1
D52          0.1
D53          0.1
D54          0.1
D55          0.1
D56          0.1
D57          0.1
D58          0.1
D59          0.1
D60          0.1
D61          0.1
D62          0.1
D63          0.1
D64          0.1
D65          0.1
D66          0.1
D67          0.1
D68          0.1
D69          0.1
D70          0.1
D71          0.1
D72          0.1
D73          0.1
D74          0.1
D75          0.1
D76          0.1
D77          0.1
D78          0.1
D79          0.1
D80          0.1
D81          0.1
D82          0.1
D83          0.1
D84          0.1
D85          0.1
D86          0.1
D87          0.1
D88          0.1
D89          0.1
D90          0.1
D91          0.1
D92          0.1
D93          0.1
D94          0.1
D95          0.1
D96          0.1
D97          0.1
D98          0.1
D99          0.1
D100         0.1
D101         0.1
D102         0.1
D103         0.1
D104         0.1
D105         0.1
D106         0.1
D107         0.1
D108         0.1
D109         0.1
D110         0.1
D111         0.1
D112         0.1
D113         0.1
D114         0.1
D115         0.1
D116         0.1
D117         0.1
D118         0.1
D119         0.1
D120         0.1
D121         0.1
D122         0.1
D123         0.1
D124         0.1
D125         0.1
D126         0.1
D127         0.1
D128         0.1
D129         0.1
D130         0.1
D131         0.1
D132         0.1
D133         0.1
D134         0.1
D135         0.1
D136         0.1
D137         0.1
D138         0.1
D139         0.1
D140         0.1
D141         0.1
D142         0.1
D143         0.1
D144         0.1
D145         0.1
D146         0.1
D147         0.1
D148         0.1
D149         0.1
D150         0.1
D151         0.1
D152         0.1
D153         0.1
D154         0.1
D155         0.1
D156         0.1
D157         0.1
D158         0.1
D159         0.1
D160         0.1
D161         0.1
D162         0.1
D163         0.1
D164         0.1
D165         0.1
D166         0.1
D167         0.1
D168         0.1
D169         0.1
D170         0.1
D171         0.1
D172         0.1
D173         0.1
D174         0.1
D175         0.1
D176         0.1
D177         0.1
D178         0.1
D179         0.1
D180         0.1
D181         0.1
D182         0.1
D183         0.1
D184         0.1
D185         0.1
D186         0.1
D187         0.1
D188         0.1
D189         0.1
D190         0.1
D191         0.1
D192         0.1
D193         0.1
D194         0.1
D195         0.1
D196         0.1
D197         0.1
D198         0.1
D199         0.1
D200         0.1
D201         0.1
D202         0.1
D203         0.1
D204         0.1
D205         0.1
D206         0.1
D207         0.1
D208         0.1
D209         0.1
D210         0.1
D211         0.1
D212         0.1
D213         0.1
D214         0.1
D215         0.1
D216         0.1
D217         0.1
D218         0.1
D219         0.1
D220         0.1
D221         0.1
D222         0.1
D223         0.1
D224         0.1
D225         0.1
D226         0.1
D227         0.1
D228         0.1
D229         0.1
D230         0.1
D231         0.1
D232         0.1
D233         0.1
D234         0.1
D235         0.1
D236         0.1
D237         0.1
D238         0.1
D239         0.1
D240         0.1
D241         0.1
D242         0.1
D243         0.1
D244         0.1
D245         0.1
D246         0.1
D247         0.1
D248         0.1
D249         0.1
D250         0.1
D251         0.1
D252         0.1
D253         0.1
D254         0.1
D255         0.1
D256         0.1
D257         0.1
D258         0.1
D259         0.1
D260         0.1
D261         0.1
D262         0.1
D263         0.1
D264         0.1
D265         0.1
D266         0.1
D267         0.1
D268         0.1
D269         0.1
D270         0.1
D271         0.1
D272         0.1
D273         0.1
D274         0.1
D275         0.1
D276         0.1
D277         0.1
D278         0.1
D279         0.1
D280         0.1
D281         0.1
D282         0.1
D283         0.1
D284         0.1
D285         0.1
D286         0.1
D287         0.1
D288         0.1
D289         0.1
D290         0.1
D291         0.1
D292         0.1
D293         0.1
D294         0.1
D295         0.1
D296         0.1
D297         0.1
D298         0.1
D299         0.1
D300         0.1
D301         0.1
D302         0.1
D303         0.1
D304         0.1
D305         0.1
D306         0.1
D307         0.1
D308         0.1
D309         0.1
D310         0.1
D311         0.1
D312         0.1
D313         0.1
D314         0.1
D315         0.1
D316         0.1
D317         0.1
D318         0.1
D319         0.1
D320         0.1
D321         0.1
D322         0.1
D323         0.1
D324         0.1
D325         0.1
D326         0.1
D327         0.1
D328         0.1
D329         0.1
D330         0.1
D331         0.1
D332         0.1
D333         0.1
D334         0.1
D335         0.1
D336         0.1
D337         0.1
D338         0.1
D339         0.1
D340         0.1
D341         0.1
D342         0.1
D343         0.1
D344         0.1
D345         0.1
D346         0.1
D347         0.1
D348         0.1
D349         0.1
D350         0.1
D351         0.1
D352         0.1
D353         0.1
D354         0.1
D355         0.1
D356         0.1
D357         0.1
D358         0.1
D359         0.1
D360         0.1
D361         0.1
D362         0.1
D363         0.1
D364         0.1
D365         0.1
D366         0.1
D367         0.1
D368         0.1
D369         0.1
D370         0.1
D371         0.1
D372         0.1
D373         0.1
D374         0.1
D375         0.1
D376         0.1
D377         0.1
D378         0.1
D379         0.1
D380         0.1
D381         0.1
D382         0.1
D383         0.1
D384         0.1
D385         0.1
D386         0.1
D387         0.1
D388         0.1
D389         0.1
D390         0.1
D391         0.1
D392         0.1
D393         0.1
D394         0.1
D395         0.1
D396         0.1
D397         0.1
D398         0.1
D399         0.1
D400         0.1
D401         0.1
D402         0.1
D403         0.1
D404         0.1
D405         0.1
D406         0.1
D407         0.1
D408         0.1
D409         0.1
D410         0.1
D411         0.1
D412         0.1
D413         0.1
D414         0.1
D415         0.1
D416         0.1
D417         0.1
D418         0.1
D419         0.1
D420         0.1
D421         0.1
D422         0.1
D423         0.1
D424         0.1
D425         0.1
D426         0.1
D427         0.1
D428         0.1
D429         0.1
D430         0.1
D431         0.1
D432         0.1
D433         0.1
D434         0.1
D435         0.1
D436         0.1
D437         0.1
D438         0.1
D439         0.1
D440         0.1
D441         0.1
D442         0.1
D443         0.1
D444         0.1
D445         0.1
D446         0.1
D447         0.1
D448         0.1
D449         0.1
D450         0.1
D451         0.1
D452         0.1
D453         0.1
D454         0.1
D455         0.1
D456         0.1
D457         0.1
D458         0.1
D459         0.1
D460         0.1
D461         0.1
D462         0.1
D463         0.1
D464         0.1
D465         0.1
D466         0.1
D467         0.1
D468         0.1
D469         0.1
D470         0.1
D471         0.1
D472         0.1
D473         0.1
D474         0.1
D475         0.1
D476         0.1
D477         0.1
D478         0.1
D479         0.1
D480         0.1
D481         0.1
D482         0.1
D483         0.1
D484         0.1
D485         0.1
D486         0.1
D487         0.1
D488         0.1
D489         0.1
D490         0.1
D491         0.1
D492         0.1
D493         0.1
D494         0.1
D495         0.1
D496         0.1
D497         0.1
D498         0.1
D499         0.1
D500         0.1
D501         0.1
D502         0.1
D503         0.1
D504         0.1
D505         0.1
D506         0.1
D507         0.1
D508         0.1
D509         0.1
D510         0.1
D511         0.1
D512         0.1
D513         0.1
D514         0.1
D515         0.1
D516         0.1
D517         0.1
D518         0.1
D519         0.1
D520         0.1
D521         0.1
D522         0.1
D523         0.1
D524         0.1
D525         0.1
D526         0.1
D527         0.1
D528         0.1
D529         0.1
D530         0.1
D531         0.1
D532         0.1
D533         0.1
D534         0.1
D535         0.1
D536         0.1
D537         0.1
D538         0.1
D539         0.1
D540         0.1
D541         0.1
D542         0.1
D543         0.1
D544         0.1
D545         0.1
D546         0.1
D547         0.1
D548         0.1
D549         0.1
D550         0.1
D551         0.1
D552         0.1
D553         0.1
D554         0.1
D555         0.1
D556         0.1
D557         0.1
D558         0.1
D559         0.1
D560         0.1
D561         0.1
D562         0.1
D563         0.1
D564         0.1
D565         0.1
D566         0.1
D567         0.1
D568         0.1
D569         0.1
D570         0.1
D571         0.1
D572         0.1
D573         0.1
D574         0.1
D575         0.1
D576         0.1
D577         0.1
D578         0.1
D579         0.1
D580         0.1
D581         0.1
D582         0.1
D583         0.1
D584         0.1
D585         0.1
D586         0.1
D587         0.1
D588         0.1
D589         0.1
D590         0.1
D591         0.1
D592         0.1
D593         0.1
D594         0.1
D595         0.1
D596         0.1
D597         0.1
D598         0.1
D599         0.1
D600         0.1
D601         0.1
D602         0.1
D603         0.1
D604         0.1
D605         0.1
D606         0.1
D607         0.1
D608         0.1
D609         0.1
D610         0.1
D611         0.1
D612         0.1
D613         0.1
D614         0.1
D615         0.1
D616         0.1
D617         0.1
D618         0.1
D619         0.1
D620         0.1
D621         0.1
D622         0.1
D623         0.1
D624         0.1
D625         0.1
D626         0.1
D627         0.1
D628         0.1
D629         0.1
D630         0.1
D631         0.1
D632         0.1
D633         0.1
D634         0.1
D635         0.1
D636         0.1
D637         0.1
D638         0.1
D639         0.1
D640         0.1
D641         0.1
D642         0.1
D643         0.1
D644         0.1
D645         0.1
D646         0.1
D647         0.1
D648         0.1
D649         0.1
D650         0.1
D651         0.1
D652         0.1
D653         0.1
D654         0.1
D655         0.1
D656         0.1
D657         0.1
D658         0.1
D659         0.1
D660         0.1
D661         0.1
D662         0.1
D663         0.1
D664         0.1
D665         0.1
D666         0.1
D667         0.1
D668         0.1
D669         0.1
D670         0.1
D671         0.1
D672         0.1
D673         0.1
D674         0.1
D675         0.1
D676         0.1
D677         0.1
D678         0.1
D679         0.1
D680         0.1
D681         0.1
D682         0.1
D683         0.1
D684         0.1
D685         0.1
D686         0.1
D687         0.1
D688         0.1
D689         0.1
D690         0.1
D691         0.1
D692         0.1
D693         0.1
D694         0.1
D695         0.1
D696         0.1
D697         0.1
D698         0.1
D699         0.1
D700         0.1
D701         0.1
D702         0.1
D703         0.1
D704         0.1
D705         0.1
D706         0.1
D707         0.1
D708         0.1
D709         0.1
D710         0.1
D711         0.1
D712         0.1
D713         0.1
D714         0.1
D715         0.1
D716         0.1
D717         0.1
D718         0.1
D719         0.1
D720         0.1
D721         0.1
D722         0.1
D723         0.1
D724         0.1
D725         0.1
D726         0.1
D727         0.1
D728         0.1
D729         0.1
D730         0.1
D731         0.1
D732         0.1
D733         0.1
D734         0.1
D735         0.1
D736         0.1
D737         0.1
D738         0.1
D739         0.1
D740         0.1
D741         0.1
D742         0.1
D743         0.1
D744         0.1
D745         0.1
D746         0.1
D747         0.1
D748         0.1
D749         0.1
D750         0.1
D751         0.1
D752         0.1
D753         0.1
D754         0.1
D755         0.1
D756         0.1
D757         0.1
D758         0.1
D759         0.1
D760         0.1
D761         0.1
D762         0.1
D763         0.1
D764         0.1
D765         0.1
D766         0.1
D767         0.1
D768         0.1
D769         0.1
D770         0.1
D771         0.1
D772         0.1
D773         0.1
D774         0.1
D775         0.1
D776         0.1
D777         0.1
D778         0.1
D779         0.1
D780         0.1
D781         0.1
D782         0.1
D783         0.1
D784         0.1
D785         0.1
D786         0.1
D787         0.1
D788         0.1
D789         0.1
D790         0.1
D791         0.1
D792         0.1
D793         0.1
D794         0.1
D795         0.1
D796         0.1
D797         0.1
D798         0.1
D799         0.1
D800         0.1
D801         0.1
D802         0.1
D803         0.1
D804         0.1
D805         0.1
D806         0.1
D807         0.1
D808         0.1
D809         0.1
D810         0.1
D811         0.1
D812         0.1
D813         0.1
D814         0.1
D815         0.1
D816         0.1
D817         0.1
D818         0.1
D819         0.1
D820         0.1
D821         0.1
D822         0.1
D823         0.1
D824         0.1
D825         0.1
D826         0.1
D827         0.1
D828         0.1
D829         0.1
D830         0.1
D831         0.1
D832         0.1
D833         0.1
D834         0.1
D835         0.1
D836         0.1
D837         0.1
D838         0.1
D839         0.1
D840         0.1
D841         0.1
D842         0.1
D843         0.1
D844         0.1
D845         0.1
D846         0.1
D847         0.1
D848         0.1
D849         0.1
D850         0.1
D851         0.1
D852         0.1
D853         0.1
D854         0.1
D855         0.1
D856         0.1
D857         0.1
D858         0.1
D859         0.1
D860         0.1
D861         0.1
D862         0.1
D863         0.1
D864         0.1
D865         0.1
D866         0.1
D867         0.1
D868         0.1
D869         0.1
D870         0.1
D871         0.1
D872         0.1
D873         0.1
D874         0.1
D875         0.1
D876         0.1
D877         0.1
D878         0.1
D879         0.1
D880         0.1
D881         0.1
D882         0.1
D883         0.1
D884         0.1
D885         0.1
D886         0.1
D887         0.1
D888         0.1
D889         0.1
D890         0.1
D891         0.1
D892         0.1
D893         0.1
D894         0.1
D895         0.1
D896         0.1
D897         0.1
D898         0.1
D899         0.1
D900         0.1
D901         0.1
D902         0.1
D903         0.1
D904         0.1
D905         0.1
D906         0.1
D907         0.1
D908         0.1
D909         0.1
D910         0.1
D911         0.1
D912         0.1
D913         0.1
D914         0.1
D915         0.1
D916         0.1
D917         0.1
D918         0.1
D919         0.1
D920         0.1
D921         0.1
D922         0.1
D923         0.1
D924         0.1
D925         0.1
D926         0.1
D927         0.1
D928         0.1
D929         0.1
D930         0.1
D931         0.1
D932         0.1
D933         0.1
D934         0.1
D935         0.1
D936         0.1
D937         0.1
D938         0.1
D939         0.1
D940         0.1
D941         0.1
D942         0.1
D943         0.1
D944         0.1
D945         0.1
D946         0.1
D947         0.1
D948         0.1
D949         0.1
D950         0.1
D951         0.1
D952         0.1
D953         0.1
D954         0.1
D955         0.1
D956         0.1
D957         0.1
D958         0.1
D959         0.1
D960         0.1
D961         0.1
D962         0.1
D963         0.1
D964         0.1
D965         0.1
D966         0.1
D967         0.1
D968         0.1
D969         0.1
D970         0.1
D971         0.1
D972         0.1
D973         0.1
D974         0.1
D975         0.1
D976         0.1
D977         0.1
D978         0.1
D979         0.1
D980         0.1
D981         0.1
D982         0.1
D983         0.1
D984         0.1
D985         0.1
D986         0.1
D987         0.1
D988         0.1
D989         0.1
D990         0.1
D991         0.1
D992         0.1
D993         0.1
D994         0.1
D995         0.1
D996         0.1
D997         0.1
D998         0.1
D999         0.1

```

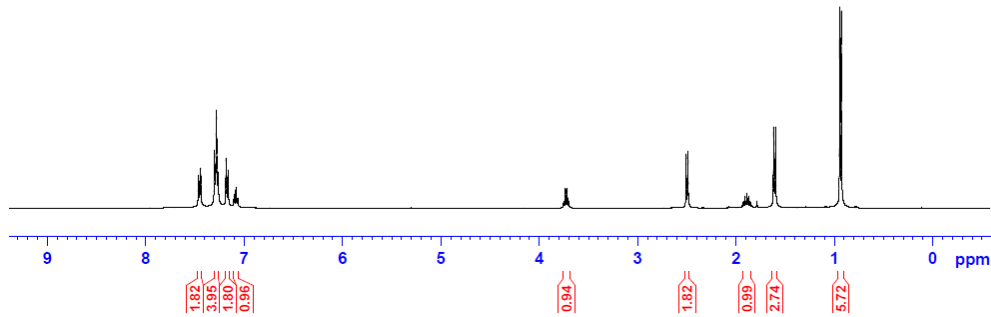

172.71  
141.25  
138.17  
138.03  
130.00  
129.03  
127.57  
124.29  
119.73

77.48  
77.16  
76.85

47.89  
45.14

30.32

22.52

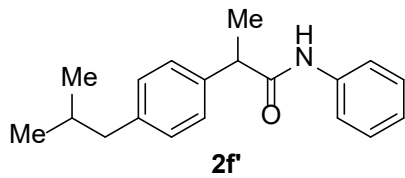

```

Current Data Parameters
NAME          11158-1
EXPNO        12
PROCNO       1
F2 - Acquisition Parameters
Date_         2011018
Time          19.51 h
INSTRUM      Avance
PROBHD       2163739_0319 T
PULPROG      zgpg30
TD            65536
SOLVENT      CDCl3
NS            2
DS            4
SWH           8196.722 Hz
FIDRES       0.255144 Hz
AQ           3.8976939 sec
RG           50.7317
AQ           61.000 usec
DE           13.96 usec
TE           304.4 K
D1           1.00000000 sec
D11          0.1
D12          0.1
D13          0.1
D14          0.1
D15          0.1
D16          0.1
D17          0.1
D18          0.1
D19          0.1
D20          0.1
D21          0.1
D22          0.1
D23          0.1
D24          0.1
D25          0.1
D26          0.1
D27          0.1
D28          0.1
D29          0.1
D30          0.1
D31          0.1
D32          0.1
D33          0.1
D34          0.1
D35          0.1
D36          0.1
D37          0.1
D38          0.1
D39          0.1
D40          0.1
D41          0.1
D42          0.1
D43          0.1
D44          0.1
D45          0.1
D46          0.1
D47          0.1
D48          0.1
D49          0.1
D50          0.1
D51          0.1
D52          0.1
D53          0.1
D54          0.1
D55          0.1
D56          0.1
D57          0.1
D58          0.1
D59          0.1
D60          0.1
D61          0.1
D62          0.1
D63          0.1
D64          0.1
D65          0.1
D66          0.1
D67          0.1
D68          0.1
D69          0.1
D70          0.1
D71          0.1
D72          0.1
D73          0.1
D74          0.1
D75          0.1
D76          0.1
D77          0.1
D78          0.1
D79          0.1
D80          0.1
D81          0.1
D82          0.1
D83          0.1
D84          0.1
D85          0.1
D86          0.1
D87          0.1
D88          0.1
D89          0.1
D90          0.1
D91          0.1
D92          0.1
D93          0.1
D94          0.1
D95          0.1
D96          0.1
D97          0.1
D98          0.1
D99          0.1
D100         0.1
D101         0.1
D102         0.1
D103         0.1
D104         0.1
D105         0.1
D106         0.1
D107         0.1
D108         0.1
D109         0.1
D110         0.1
D111         0.1
D112         0.1
D113         0.1
D114         0.1
D115         0.1
D116         0.1
D117         0.1
D118         0.1
D119         0.1
D120         0.1
D121         0.1
D122         0.1
D123         0.1
D124         0.1
D125         0.1
D126         0.1
D127         0.1
D128         0.1
D129         0.1
D130         0.1
D131         0
```

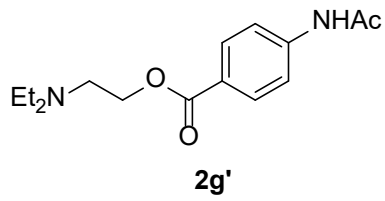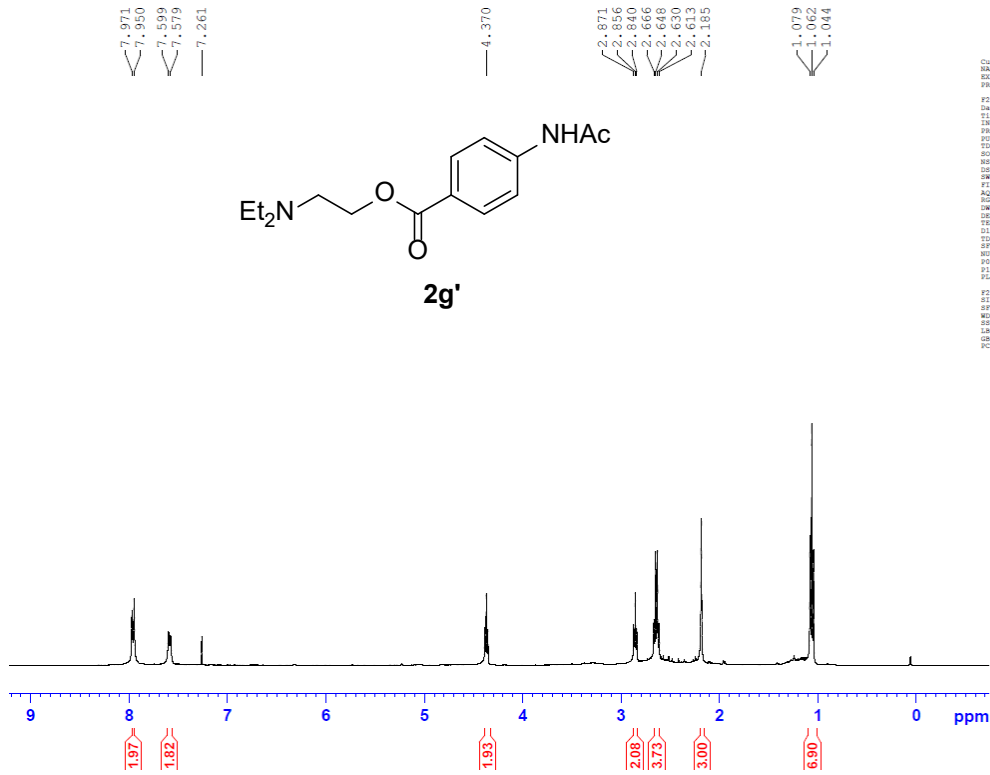

```

Current Data Parameters
NAME      110226-2
EXPNO    10
PROCNO   1
F2 - Acquisition Parameters
Date_    2011021
Time     11.31 h
INSTRUM  Avance
PROBHD   2163739_0319 J
PULPROG  zgpg30
TD       65536
SOLVENT  DMSO
NS       16
DS       4
SWH      8196.722 Hz
FIDRES   0.250144 Hz
AQ       3.9976855 sec
RG       101
DM       61.000 usec
DE       15.00 usec
TE       294.2 K
D1       1.00000000 sec
TD0      1
SFO1     400.274717 MHz
NUC1     13C
PC       2.51 usec
PL1      0.00 usec
PLW1     24.00000000 W
F2 - Processing parameters
SI       65536
SF       400.2700887 MHz
WDW      EM
SSB      0
LB       0.30 Hz
GB       0
DB       1.00
PC       1.00
  
```

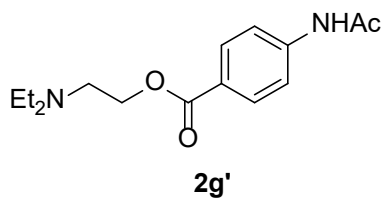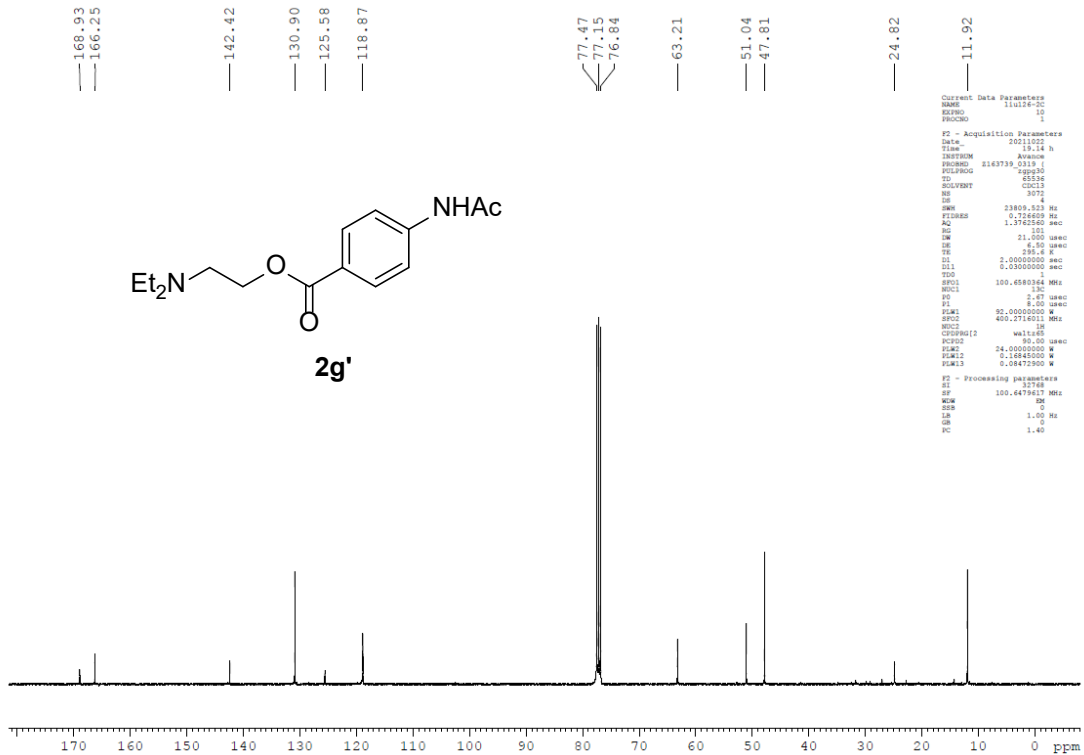

```

Current Data Parameters
NAME      110226-2
EXPNO    10
PROCNO   1
F2 - Acquisition Parameters
Date_    2011021
Time     13.14 h
INSTRUM  Avance
PROBHD   2163739_0319 J
PULPROG  zgpg30
TD       65536
SOLVENT  DMSO
NS       3072
DS       4
SWH      23809.513 Hz
FIDRES   0.252609 Hz
AQ       1.3762560 sec
RG       101
DM       21.000 usec
DE       4.00 usec
TE       295.6 K
D1       2.00000000 sec
D11      0.03000000 sec
TD0      1
SFO1     100.6260894 MHz
NUC1     13C
PC       2.67 usec
PL1      0.00 usec
PLW1     24.00000000 W
SFO2     400.2716011 MHz
NUC2     1H
CPDPRG2  waltz165
PCPD2    80.00 usec
PLM2     24.00000000 W
PLM3     0.08440000 W
PLW2     0.08440000 W
PLW3     0.08472900 W
F2 - Processing parameters
SI       13748
SF       100.6260894 MHz
WDW      EM
SSB      0
LB       1.00 Hz
GB       0
DB       1.40
PC       1.40
  
```

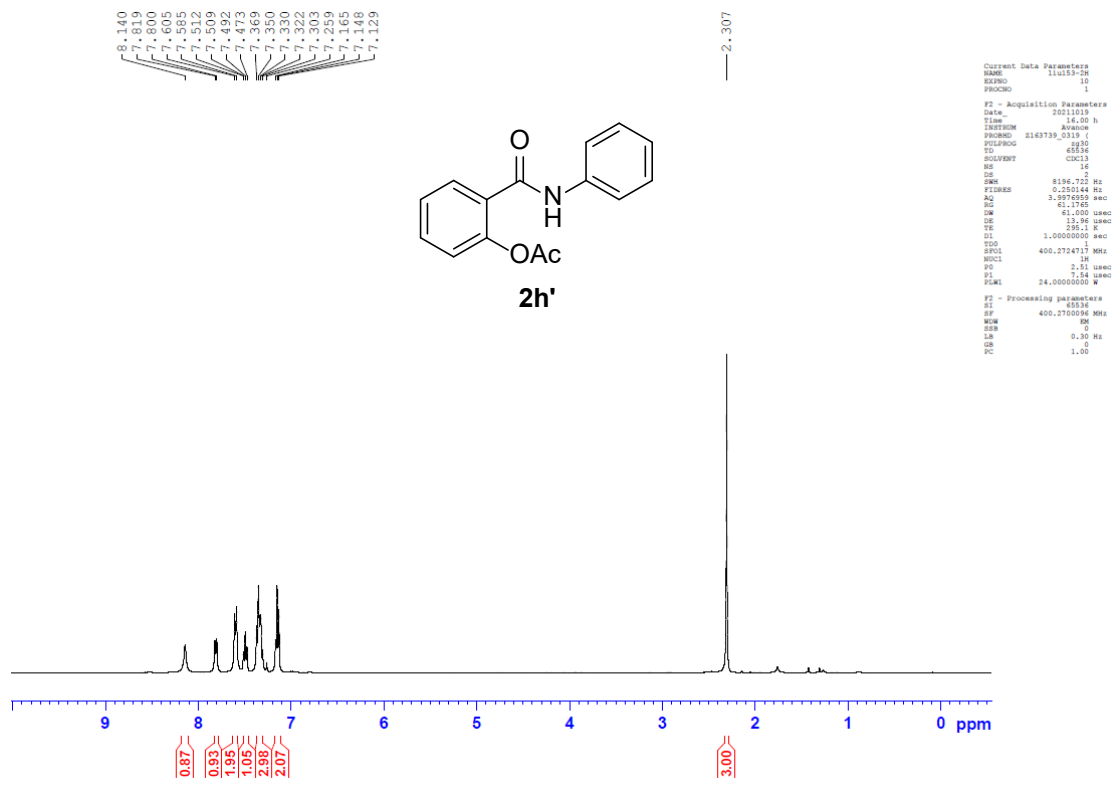

```

Current Data Parameters
NAME      11u153-26
EXPNO    10
PROCNO   1
F2 - Acquisition Parameters
Date_    2011019
Time     14.00 h
INSTRUM  Avance
PROCNO   2163739_0319 (
PULPROG  zgpg30
TD        65536
SOLVENT  CDCl3
NS        16
DS        2
SWH       8190.722 Hz
FIDRES   0.125144 Hz
AQ        3.2979000 sec
RG        61.5765
SQ        61.100 usec
DE        13.96 usec
TE        300.1 K
D1        1.0000000 sec
TSD
SFO1     400.272417 MHz
NUC1      13C
PQ        2.51 usec
RG1       1.14 usec
PLW1     24.0000000 W
F2 - Processing parameters
SI        65536
SF        400.2700994 MHz
RGW       0
SSB       0.10 Hz
LA        0
GB        1.00
PC
  
```

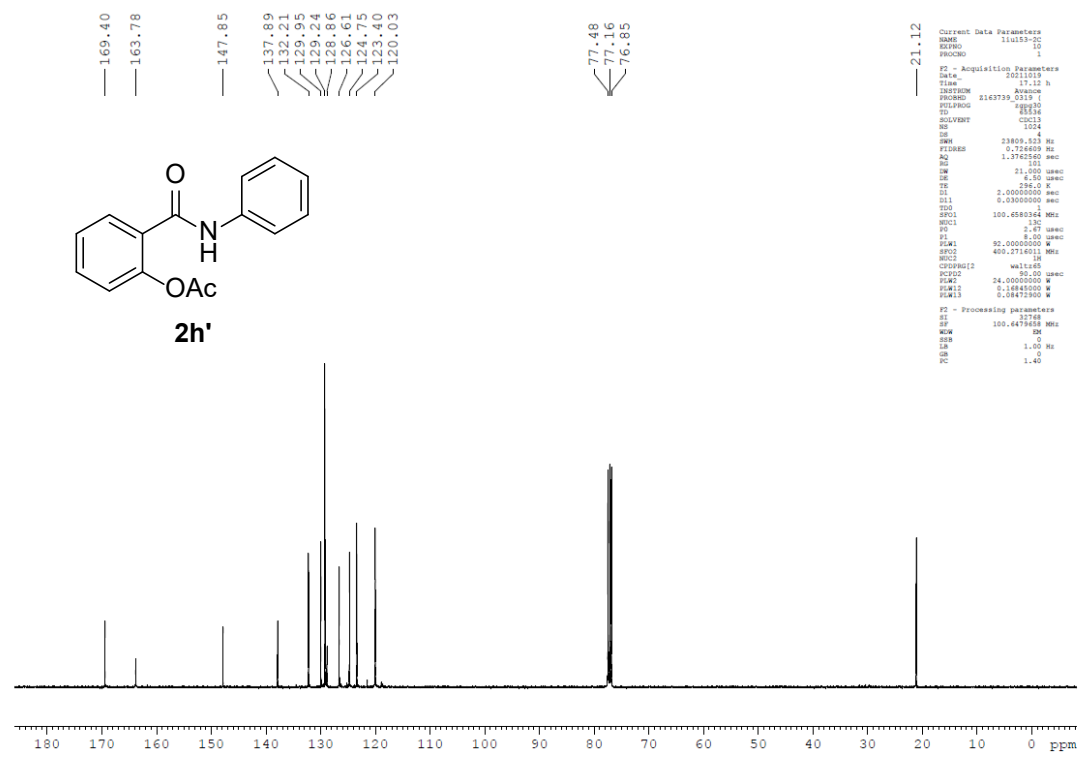

```

Current Data Parameters
NAME      11u153-26
EXPNO    10
PROCNO   1
F2 - Acquisition Parameters
Date_    2011019
Time     17.12 h
INSTRUM  Avance
PROCNO   2163739_0319 (
PULPROG  zgpg30
TD        65536
SOLVENT  CDCl3
NS        16
DS        2
SWH       23809.522 Hz
FIDRES   0.726609 Hz
AQ        1.376560 sec
RG        101
SQ        21.00 usec
DE        13.96 usec
TE        300.1 K
D1        2.0000000 sec
D11       0.0300000 sec
TSD
SFO1     100.6261364 MHz
NUC1      13C
PQ        2.67 usec
RG1       1.00 usec
PLW1     20.0000000 W
SFO2     400.2714011 MHz
NUC2      1H
CPDPRG2  waltz160
PULPROG  zgpg30
PLW2     24.0000000 W
PLW12    0.18842000 W
PLW13    0.08471900 W
F2 - Processing parameters
SI        65536
SF        100.6247668 MHz
RGW       0
SSB       0
LA        0
GB        1.00
PC        1.40
  
```

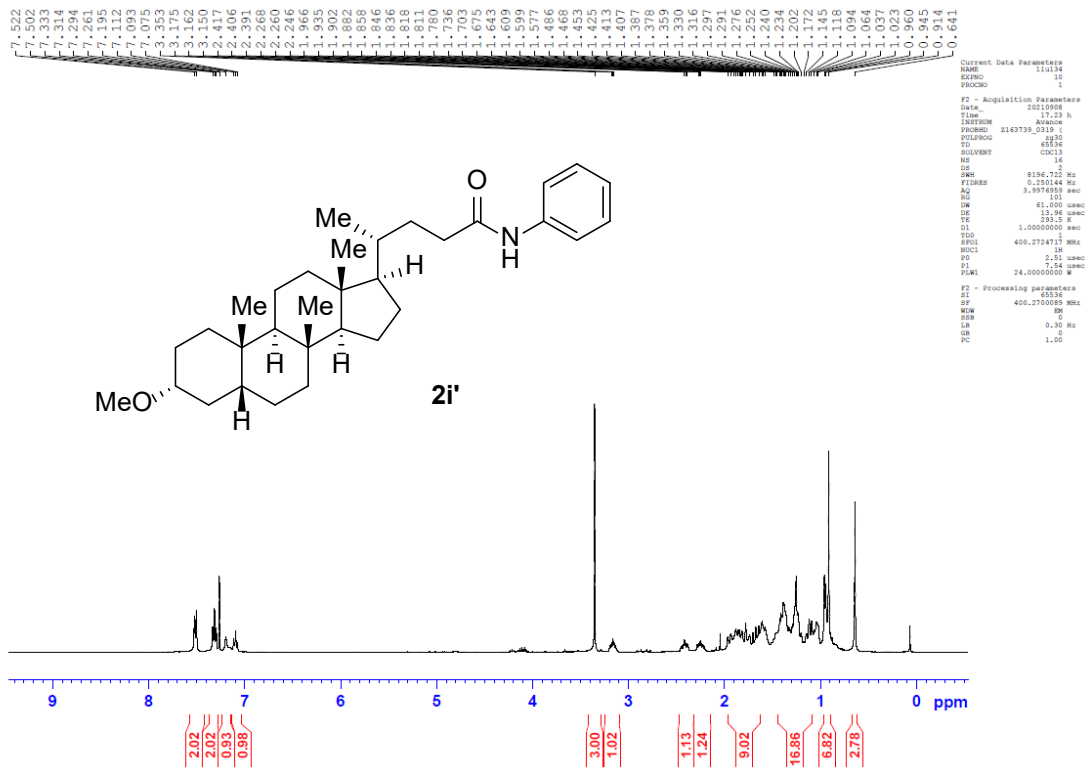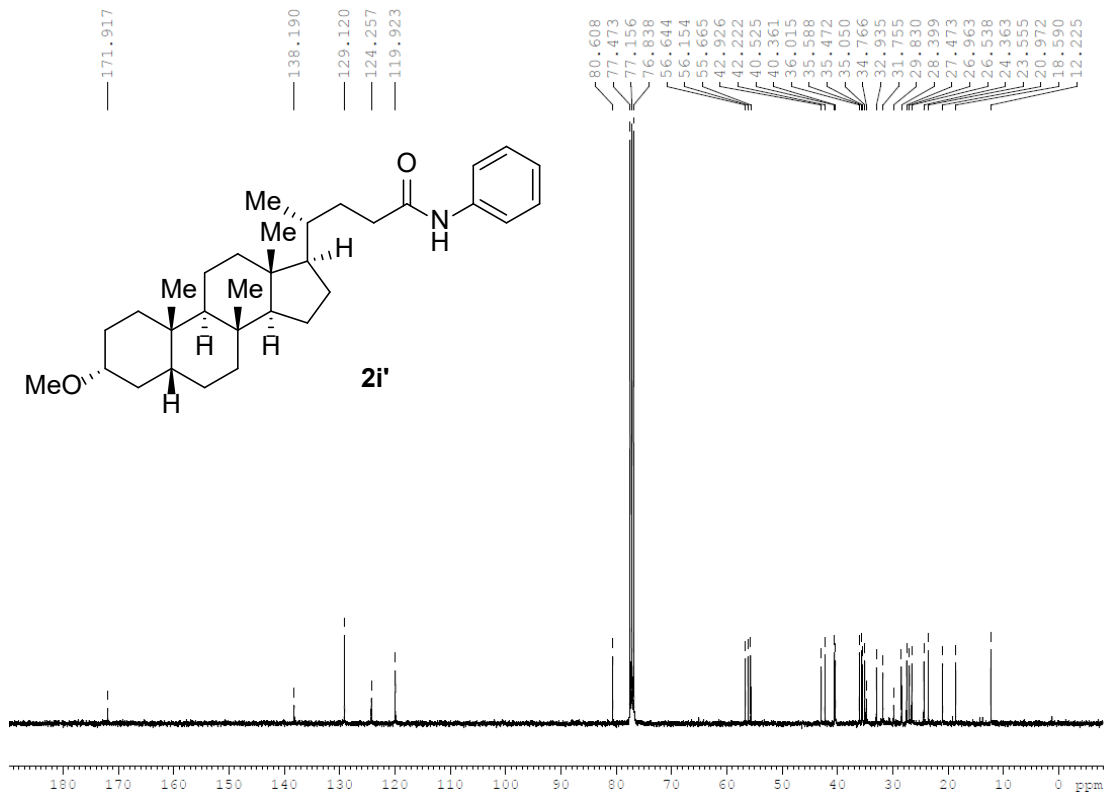

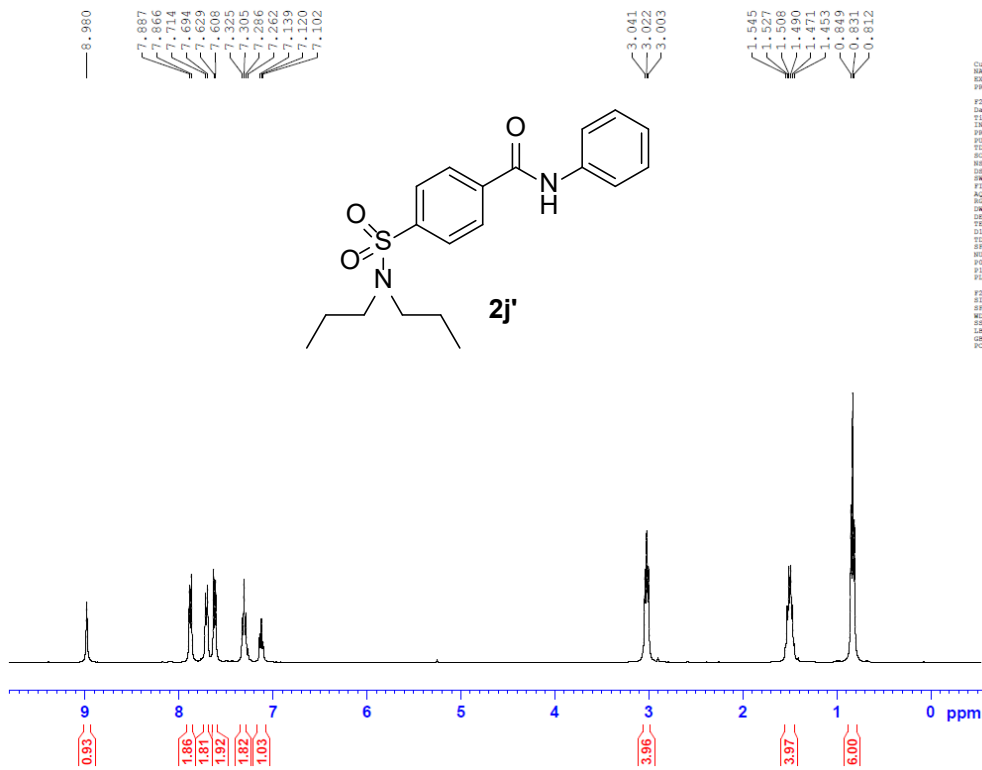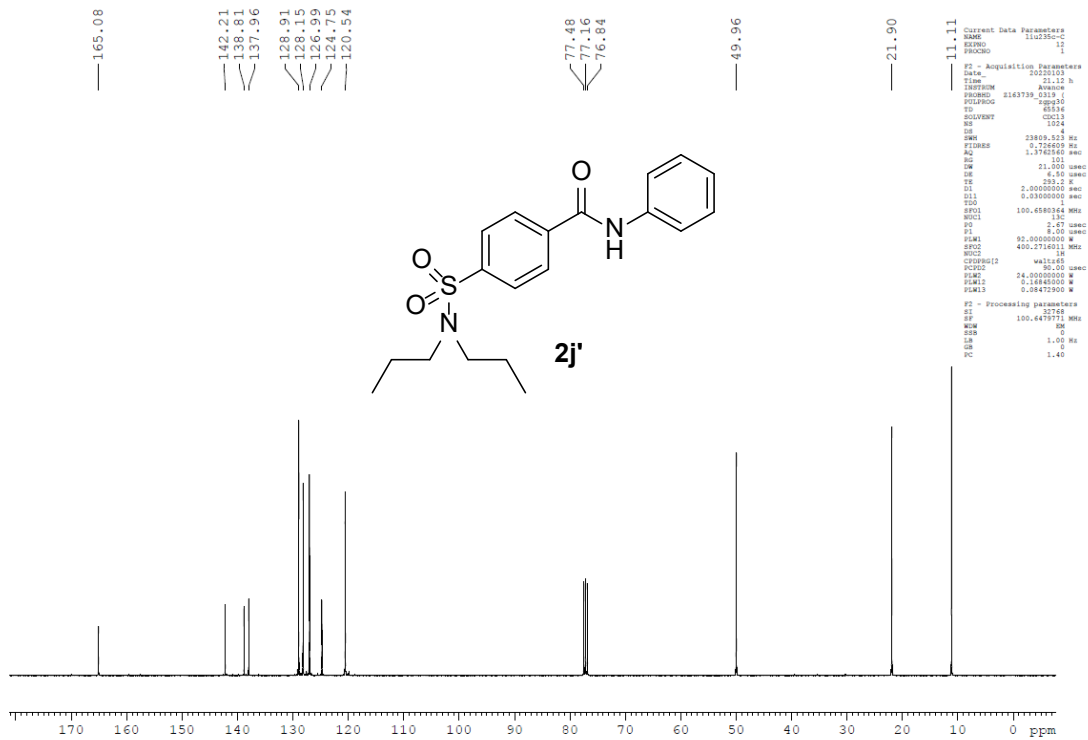

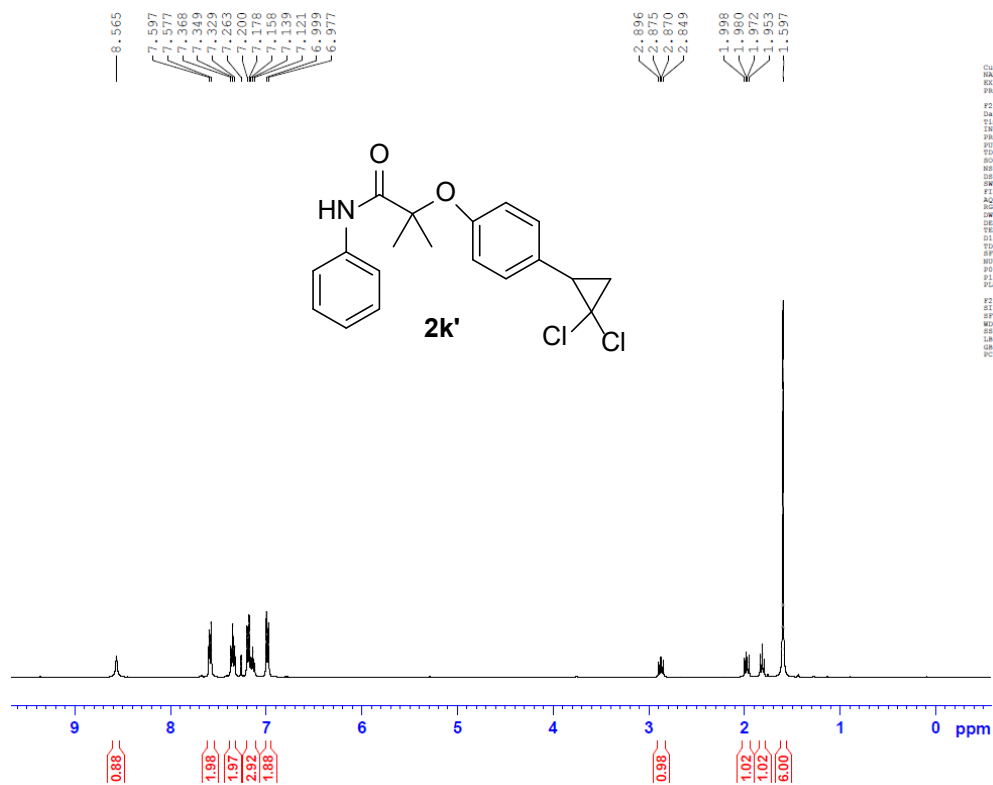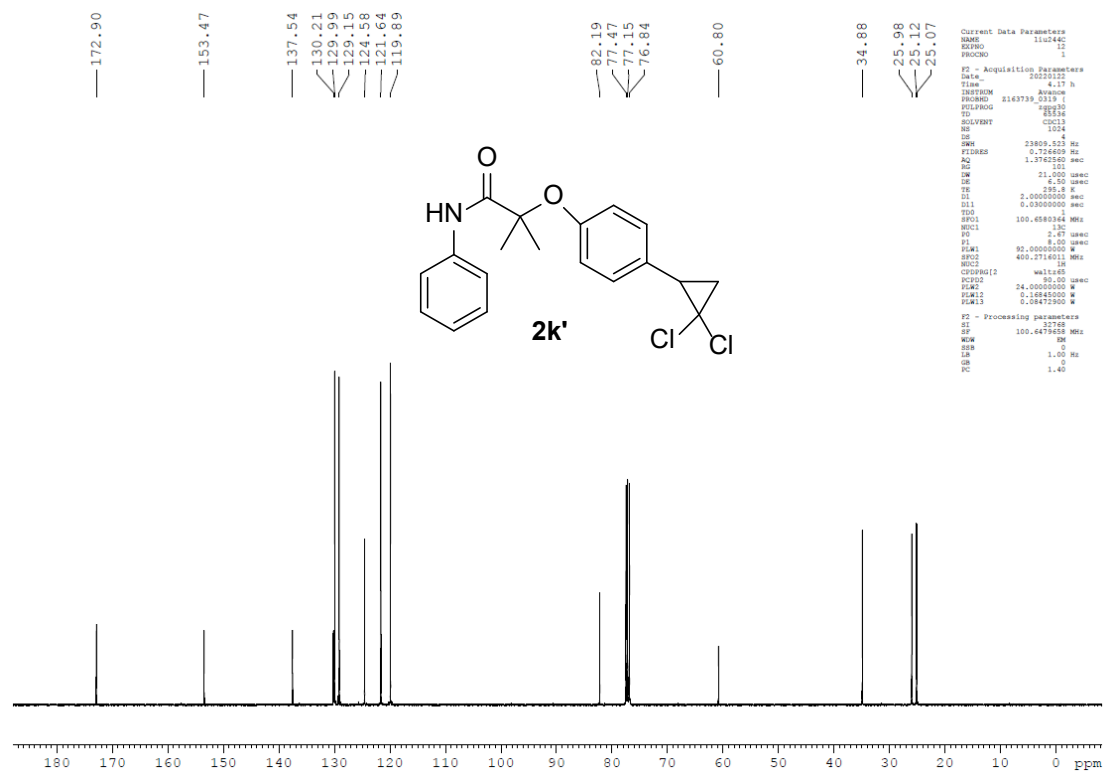

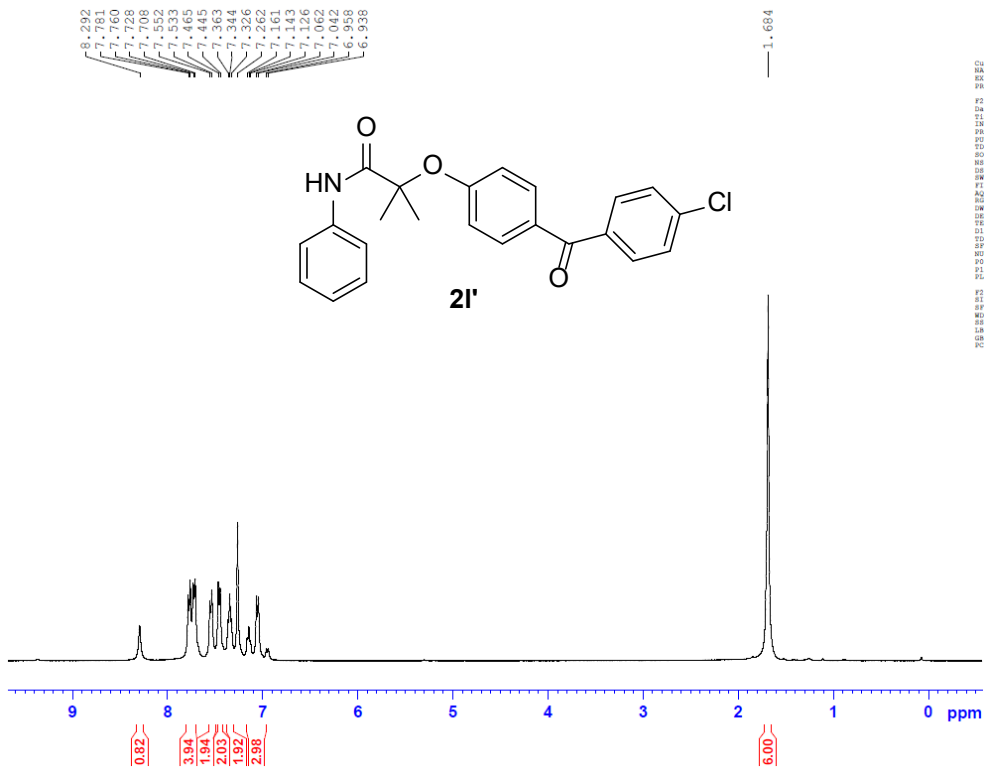

Current Data Parameters  
 NAME 1112460  
 EXPNO 12  
 PROCNO 1  
 F2 - Acquisition Parameters  
 Date\_ 20220908  
 Time 21.38 h  
 INSTRUM Avance  
 PROBHD 1H3139\_0319 (1  
 PULPROG zgpg30  
 TD 65536  
 SOLVENT CDCl3  
 NS 16  
 DS 4  
 SWH 8196.722 Hz  
 FIDRES 0.25044 Hz  
 AQ 3.997885 sec  
 RG 101  
 DW 61.000 usec  
 DE 19.00 usec  
 TE 300.2 K  
 D1 1.0000000 sec  
 D11 0.0500000 sec  
 SFO1 400.272417 MHz  
 NUCl 16  
 PC 2.51 usec  
 P1 99.14 usec  
 PLW1 24.0000000 W  
 F2 - Processing parameters  
 SI 65536  
 SF 400.270374 MHz  
 DS 4  
 WDW EM  
 SSB 0  
 LB 0.30 Hz  
 GB 1.00  
 PC 1.00

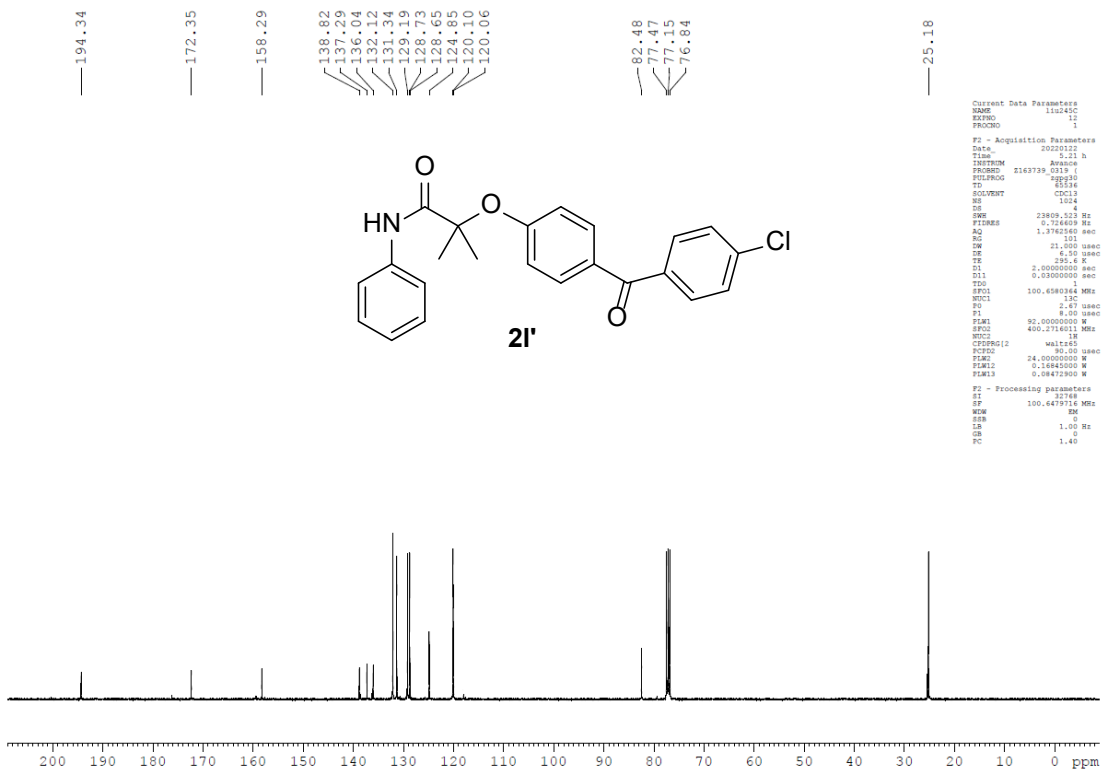

Current Data Parameters  
 NAME 1112460  
 EXPNO 12  
 PROCNO 1  
 F2 - Acquisition Parameters  
 Date\_ 20220908  
 Time 21.38 h  
 INSTRUM Avance  
 PROBHD 1H3139\_0319 (1  
 PULPROG zgpg30  
 TD 65536  
 SOLVENT CDCl3  
 NS 16  
 DS 4  
 SWH 23809.523 Hz  
 FIDRES 0.724609 Hz  
 AQ 1.3762160 sec  
 RG 102  
 DW 21.000 usec  
 DE 6.00 usec  
 TE 300.2 K  
 D1 2.0000000 sec  
 D11 0.0300000 sec  
 TD0 1  
 SFO1 100.626184 MHz  
 NUCl 13C  
 PC 2.47 usec  
 P1 9.00 usec  
 PLW1 91.0000000 W  
 PLW2 400.2716011 MHz  
 PLW3 0.18845000 W  
 PLW13 0.08472900 W  
 F2 - Processing parameters  
 SI 65536  
 SF 100.626184 MHz  
 DS 4  
 WDW EM  
 SSB 1.00 Hz  
 GB 1.00  
 PC 1.40



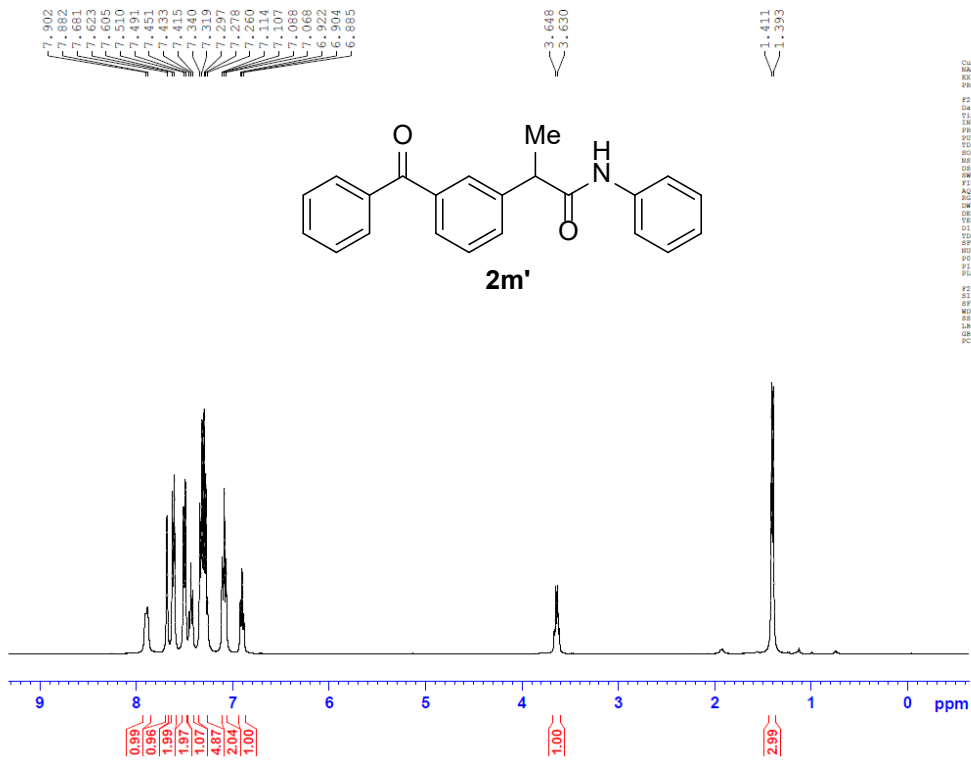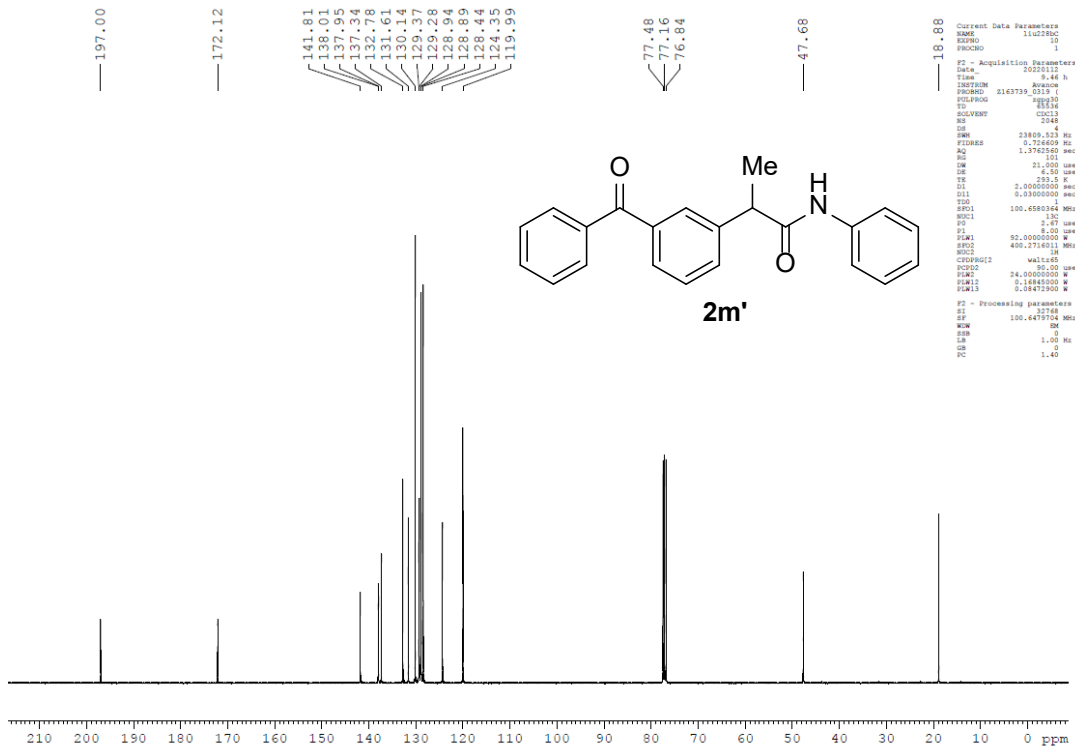

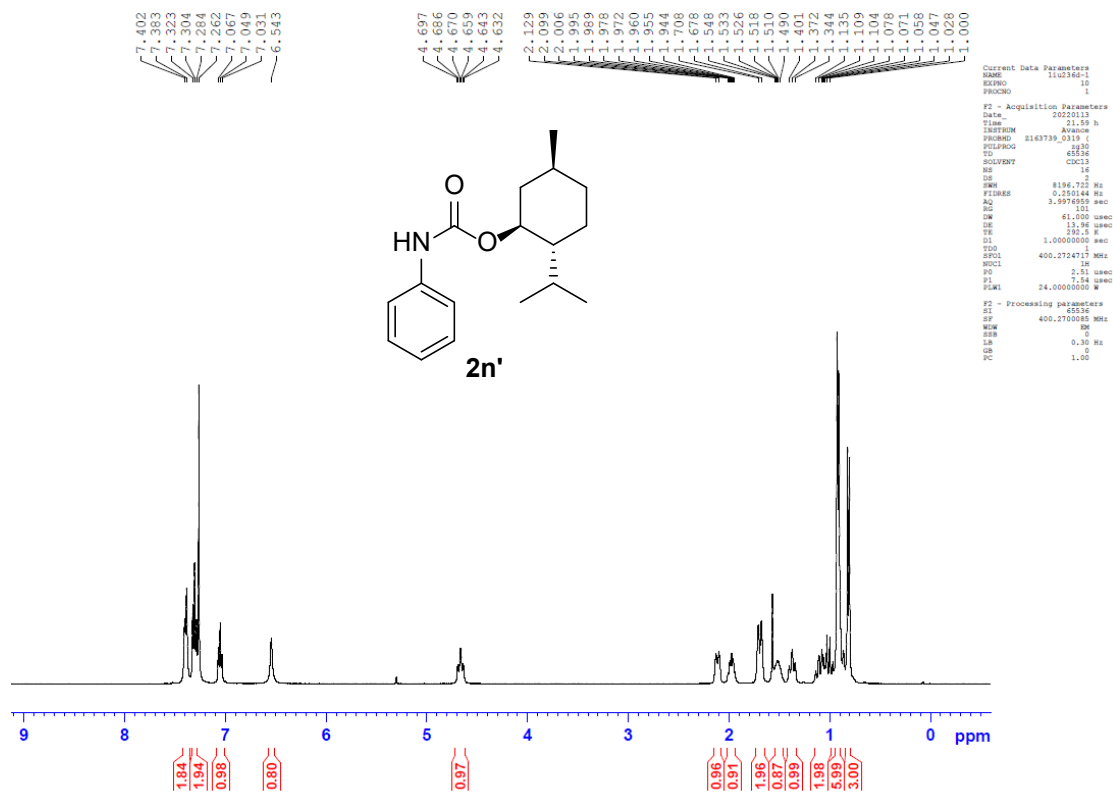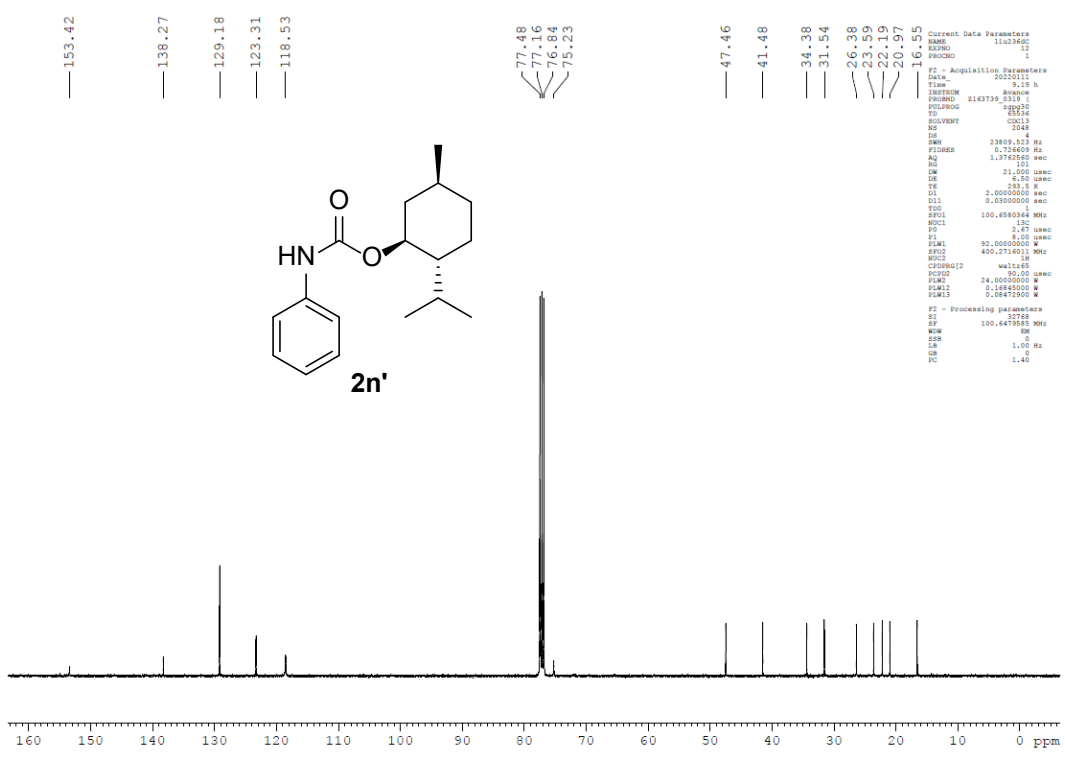

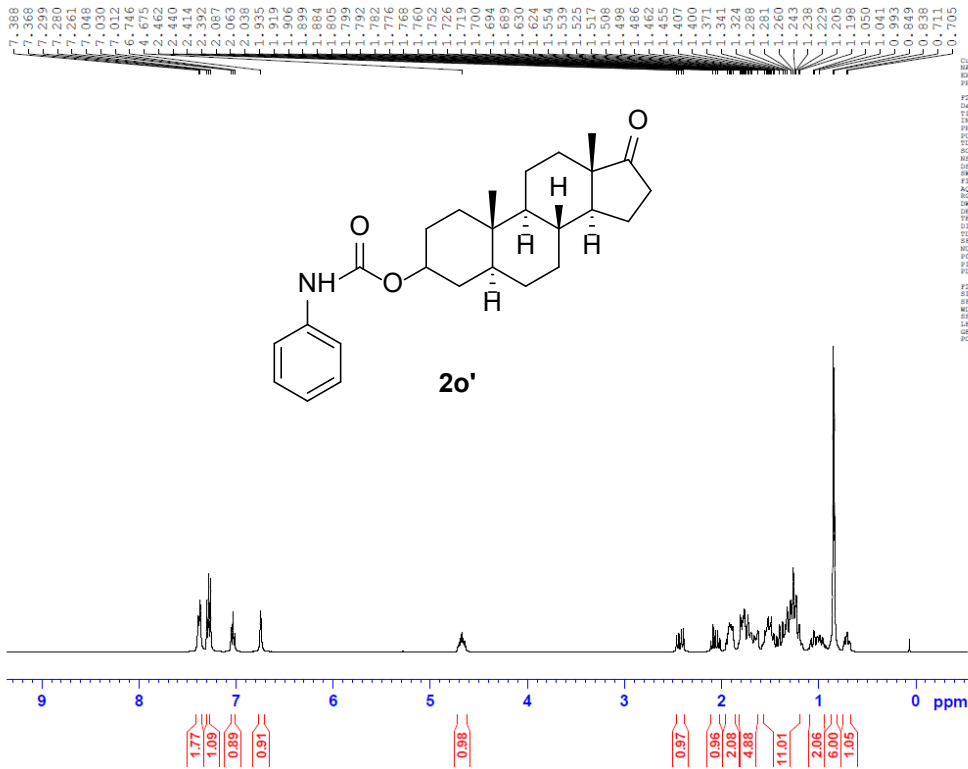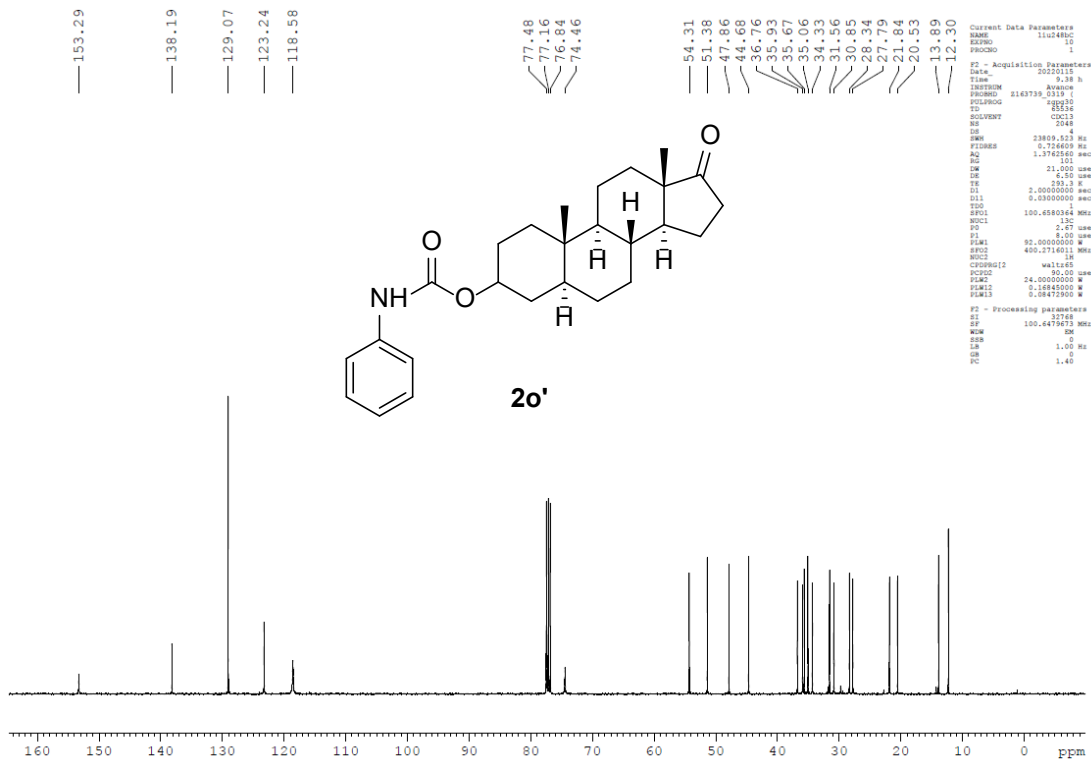

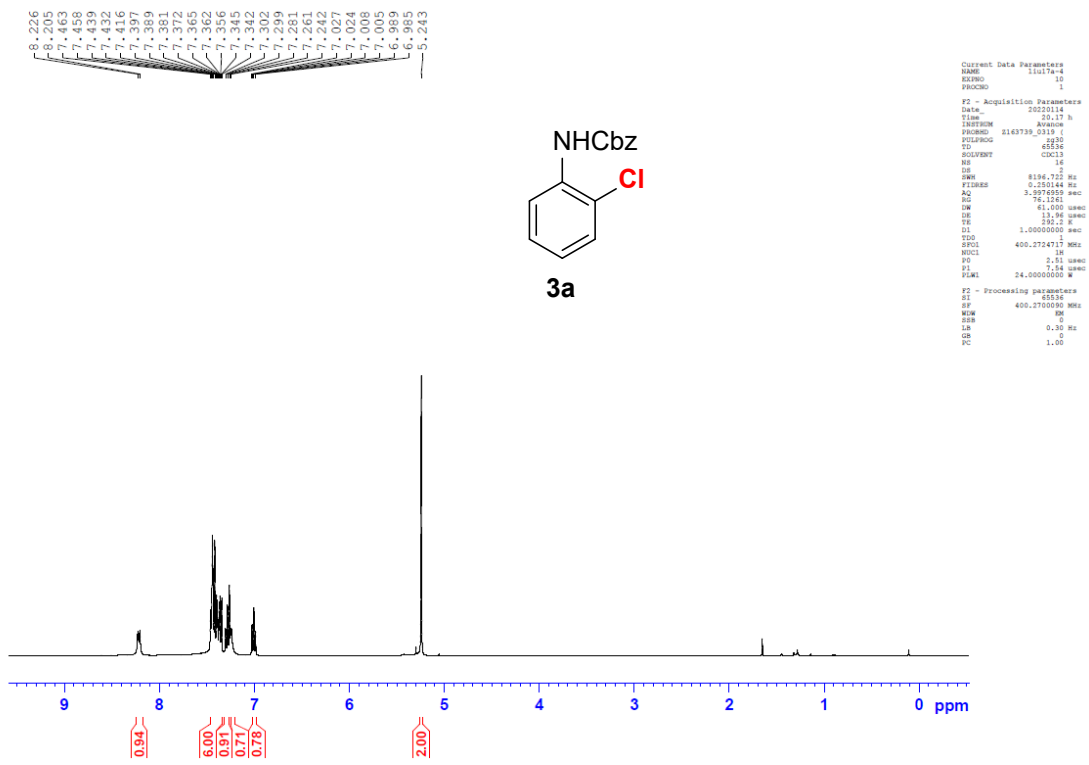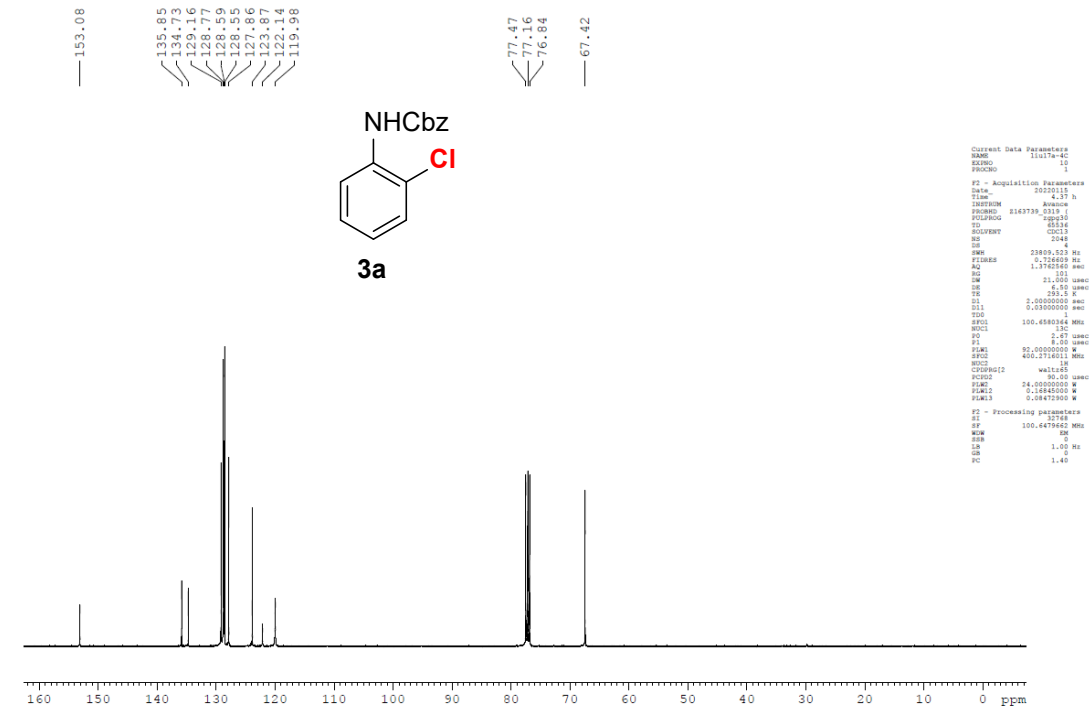

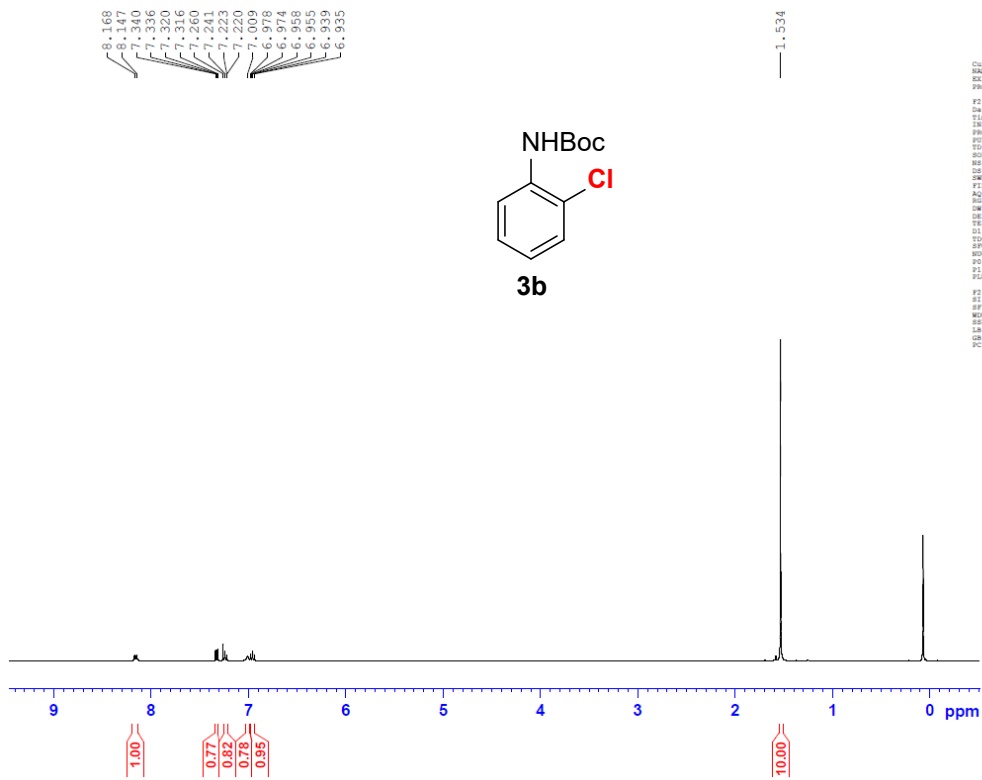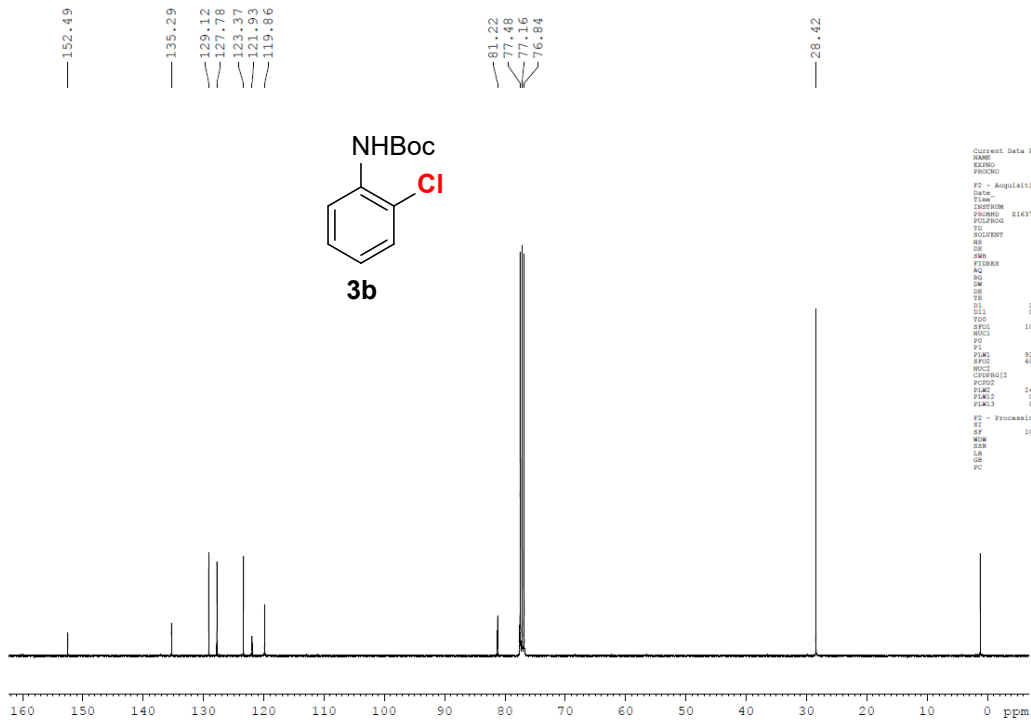

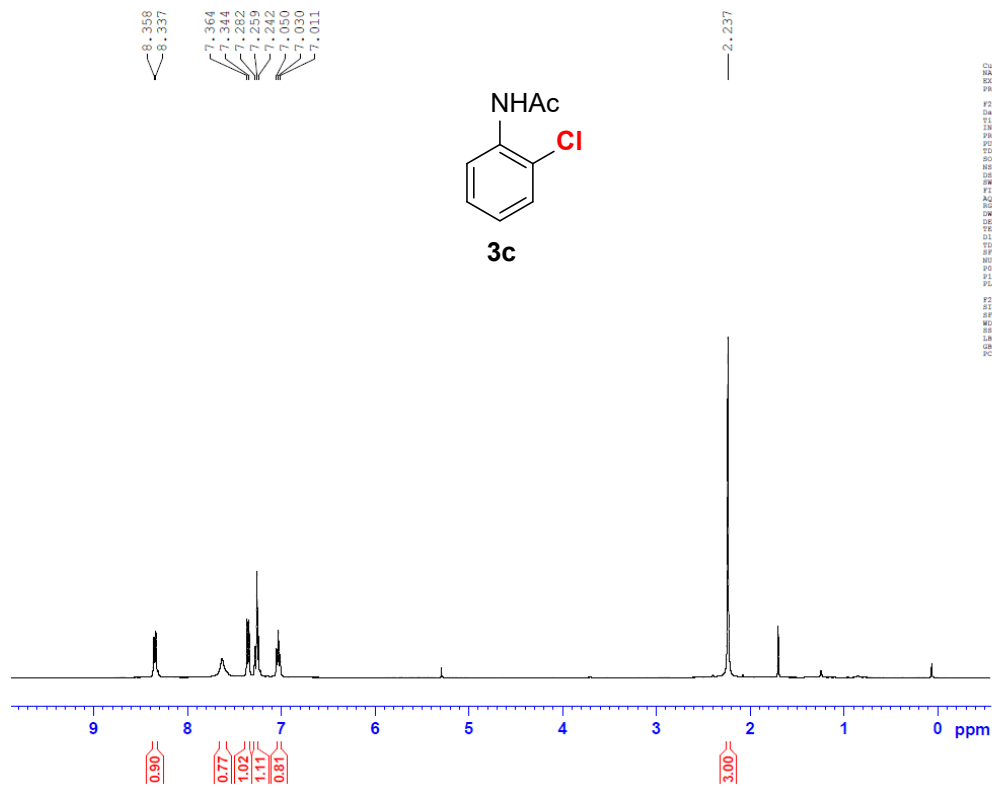

```

Current Data Parameters
NAME      110179a-1c
EXPNO    10
PROCNO   1

F2 - Acquisition Parameters
Date_    20220119
Time     15:29 h
INSTRUM  Avance
PROBHD   1H3739_0319
PULPROG  zgpg30
TD        65536
SOLVENT  CDCl3
NS        16
DS        4
SWH       8196.732 Hz
FIDRES   0.250144 Hz
AQ        3.974555 sec
RG        101
DE        61.000 usec
QE        13.06 usec
TE        301.13 K
D1        1.0000000 sec
DELTA    0.0000000 sec
SFO1     400.274117 MHz
NUC1      1H
PC        0.11 usec
P1        2.54 usec
RGAIN    24.0000000 W

F2 - Processing parameters
SI        65536
SF        400.2703308 MHz
WDW       EM
SSB       0
LB        0.30 Hz
GB        0
PC        1.00
  
```

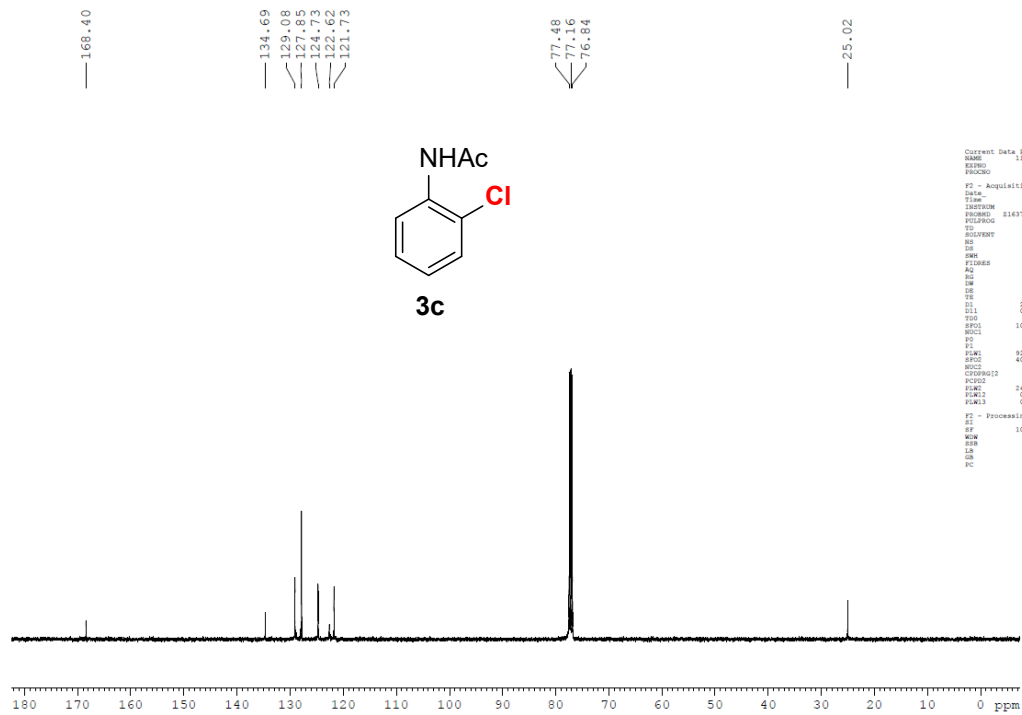

```

Current Data Parameters
NAME      110179a-1 c
EXPNO    1
PROCNO   1

F2 - Acquisition Parameters
Date_    20220119
Time     15:29 h
INSTRUM  Avance
PROBHD   1H3739_0319
PULPROG  zgpg30
TD        65536
SOLVENT  CDCl3
NS        16
DS        4
SWH       23820.523 Hz
FIDRES   0.726660 Hz
AQ        1.3742360 sec
RG        101
DE        21.950 usec
QE        15.00 usec
TE        301.13 K
D1        2.0000000 sec
D11       0.2000000 sec
D12       0.2000000 sec
D13       0.2000000 sec
SFO1     100.626192 MHz
NUC1      13C
PC        1.10 usec
P1        14.00 usec
P2        82.0000000 W
SFO2     400.2710011 MHz
NUC2      1H
SFO3     100.626192 MHz
PC3       1.10 usec
P3        14.00 usec
P4        82.0000000 W
SFO4     400.2710011 MHz
NUC4      1H
SFO5     100.626192 MHz
PC5       1.10 usec
P5        14.00 usec
P6        82.0000000 W
SFO6     400.2710011 MHz
NUC6      1H
SFO7     100.626192 MHz
PC7       1.10 usec
P7        14.00 usec
P8        82.0000000 W
SFO8     400.2710011 MHz
NUC8      1H
SFO9     100.626192 MHz
PC9       1.10 usec
P9        14.00 usec
P10       82.0000000 W
SFO10    400.2710011 MHz
NUC10    1H
SFO11    100.626192 MHz
PC11     1.10 usec
P11      14.00 usec
P12      82.0000000 W
SFO12    400.2710011 MHz
NUC12    1H
SFO13    100.626192 MHz
PC13     1.10 usec
P13      14.00 usec
P14      82.0000000 W
SFO14    400.2710011 MHz
NUC14    1H
SFO15    100.626192 MHz
PC15     1.10 usec
P15      14.00 usec
P16      82.0000000 W
SFO16    400.2710011 MHz
NUC16    1H
SFO17    100.626192 MHz
PC17     1.10 usec
P17      14.00 usec
P18      82.0000000 W
SFO18    400.2710011 MHz
NUC18    1H
SFO19    100.626192 MHz
PC19     1.10 usec
P19      14.00 usec
P20      82.0000000 W
SFO20    400.2710011 MHz
NUC20    1H
SFO21    100.626192 MHz
PC21     1.10 usec
P21      14.00 usec
P22      82.0000000 W
SFO22    400.2710011 MHz
NUC22    1H
SFO23    100.626192 MHz
PC23     1.10 usec
P23      14.00 usec
P24      82.0000000 W
SFO24    400.2710011 MHz
NUC24    1H
SFO25    100.626192 MHz
PC25     1.10 usec
P25      14.00 usec
P26      82.0000000 W
SFO26    400.2710011 MHz
NUC26    1H
SFO27    100.626192 MHz
PC27     1.10 usec
P27      14.00 usec
P28      82.0000000 W
SFO28    400.2710011 MHz
NUC28    1H
SFO29    100.626192 MHz
PC29     1.10 usec
P29      14.00 usec
P30      82.0000000 W
SFO30    400.2710011 MHz
NUC30    1H
SFO31    100.626192 MHz
PC31     1.10 usec
P31      14.00 usec
P32      82.0000000 W
SFO32    400.2710011 MHz
NUC32    1H
SFO33    100.626192 MHz
PC33     1.10 usec
P33      14.00 usec
P34      82.0000000 W
SFO34    400.2710011 MHz
NUC34    1H
SFO35    100.626192 MHz
PC35     1.10 usec
P35      14.00 usec
P36      82.0000000 W
SFO36    400.2710011 MHz
NUC36    1H
SFO37    100.626192 MHz
PC37     1.10 usec
P37      14.00 usec
P38      82.0000000 W
SFO38    400.2710011 MHz
NUC38    1H
SFO39    100.626192 MHz
PC39     1.10 usec
P39      14.00 usec
P40      82.0000000 W
SFO40    400.2710011 MHz
NUC40    1H
SFO41    100.626192 MHz
PC41     1.10 usec
P41      14.00 usec
P42      82.0000000 W
SFO42    400.2710011 MHz
NUC42    1H
SFO43    100.626192 MHz
PC43     1.10 usec
P43      14.00 usec
P44      82.0000000 W
SFO44    400.2710011 MHz
NUC44    1H
SFO45    100.626192 MHz
PC45     1.10 usec
P45      14.00 usec
P46      82.0000000 W
SFO46    400.2710011 MHz
NUC46    1H
SFO47    100.626192 MHz
PC47     1.10 usec
P47      14.00 usec
P48      82.0000000 W
SFO48    400.2710011 MHz
NUC48    1H
SFO49    100.626192 MHz
PC49     1.10 usec
P49      14.00 usec
P50      82.0000000 W
SFO50    400.2710011 MHz
NUC50    1H
SFO51    100.626192 MHz
PC51     1.10 usec
P51      14.00 usec
P52      82.0000000 W
SFO52    400.2710011 MHz
NUC52    1H
SFO53    100.626192 MHz
PC53     1.10 usec
P53      14.00 usec
P54      82.0000000 W
SFO54    400.2710011 MHz
NUC54    1H
SFO55    100.626192 MHz
PC55     1.10 usec
P55      14.00 usec
P56      82.0000000 W
SFO56    400.2710011 MHz
NUC56    1H
SFO57    100.626192 MHz
PC57     1.10 usec
P57      14.00 usec
P58      82.0000000 W
SFO58    400.2710011 MHz
NUC58    1H
SFO59    100.626192 MHz
PC59     1.10 usec
P59      14.00 usec
P60      82.0000000 W
SFO60    400.2710011 MHz
NUC60    1H
SFO61    100.626192 MHz
PC61     1.10 usec
P61      14.00 usec
P62      82.0000000 W
SFO62    400.2710011 MHz
NUC62    1H
SFO63    100.626192 MHz
PC63     1.10 usec
P63      14.00 usec
P64      82.0000000 W
SFO64    400.2710011 MHz
NUC64    1H
SFO65    100.626192 MHz
PC65     1.10 usec
P65      14.00 usec
P66      82.0000000 W
SFO66    400.2710011 MHz
NUC66    1H
SFO67    100.626192 MHz
PC67     1.10 usec
P67      14.00 usec
P68      82.0000000 W
SFO68    400.2710011 MHz
NUC68    1H
SFO69    100.626192 MHz
PC69     1.10 usec
P69      14.00 usec
P70      82.0000000 W
SFO70    400.2710011 MHz
NUC70    1H
SFO71    100.626192 MHz
PC71     1.10 usec
P71      14.00 usec
P72      82.0000000 W
SFO72    400.2710011 MHz
NUC72    1H
SFO73    100.626192 MHz
PC73     1.10 usec
P73      14.00 usec
P74      82.0000000 W
SFO74    400.2710011 MHz
NUC74    1H
SFO75    100.626192 MHz
PC75     1.10 usec
P75      14.00 usec
P76      82.0000000 W
SFO76    400.2710011 MHz
NUC76    1H
SFO77    100.626192 MHz
PC77     1.10 usec
P77      14.00 usec
P78      82.0000000 W
SFO78    400.2710011 MHz
NUC78    1H
SFO79    100.626192 MHz
PC79     1.10 usec
P79      14.00 usec
P80      82.0000000 W
SFO80    400.2710011 MHz
NUC80    1H
SFO81    100.626192 MHz
PC81     1.10 usec
P81      14.00 usec
P82      82.0000000 W
SFO82    400.2710011 MHz
NUC82    1H
SFO83    100.626192 MHz
PC83     1.10 usec
P83      14.00 usec
P84      82.0000000 W
SFO84    400.2710011 MHz
NUC84    1H
SFO85    100.626192 MHz
PC85     1.10 usec
P85      14.00 usec
P86      82.0000000 W
SFO86    400.2710011 MHz
NUC86    1H
SFO87    100.626192 MHz
PC87     1.10 usec
P87      14.00 usec
P88      82.0000000 W
SFO88    400.2710011 MHz
NUC88    1H
SFO89    100.626192 MHz
PC89     1.10 usec
P89      14.00 usec
P90      82.0000000 W
SFO90    400.2710011 MHz
NUC90    1H
SFO91    100.626192 MHz
PC91     1.10 usec
P91      14.00 usec
P92      82.0000000 W
SFO92    400.2710011 MHz
NUC92    1H
SFO93    100.626192 MHz
PC93     1.10 usec
P93      14.00 usec
P94      82.0000000 W
SFO94    400.2710011 MHz
NUC94    1H
SFO95    100.626192 MHz
PC95     1.10 usec
P95      14.00 usec
P96      82.0000000 W
SFO96    400.2710011 MHz
NUC96    1H
SFO97    100.626192 MHz
PC97     1.10 usec
P97      14.00 usec
P98      82.0000000 W
SFO98    400.2710011 MHz
NUC98    1H
SFO99    100.626192 MHz
PC99     1.10 usec
P99      14.00 usec
P100     82.0000000 W
SFO100   400.2710011 MHz
NUC100   1H
SFO101   100.626192 MHz
PC101    1.10 usec
P101     14.00 usec
P102     82.0000000 W
SFO102   400.2710011 MHz
NUC102   1H
SFO103   100.626192 MHz
PC103    1.10 usec
P103     14.00 usec
P104     82.0000000 W
SFO104   400.2710011 MHz
NUC104   1H
SFO105   100.626192 MHz
PC105    1.10 usec
P105     14.00 usec
P106     82.0000000 W
SFO106   400.2710011 MHz
NUC106   1H
SFO107   100.626192 MHz
PC107    1.10 usec
P107     14.00 usec
P108     82.0000000 W
SFO108   400.2710011 MHz
NUC108   1H
SFO109   100.626192 MHz
PC109    1.10 usec
P109     14.00 usec
P110     82.0000000 W
SFO110   400.2710011 MHz
NUC110   1H
SFO111   100.626192 MHz
PC111    1.10 usec
P111     14.00 usec
P112     82.0000000 W
SFO112   400.2710011 MHz
NUC112   1H
SFO113   100.626192 MHz
PC113    1.10 usec
P113     14.00 usec
P114     82.0000000 W
SFO114   400.2710011 MHz
NUC114   1H
SFO115   100.626192 MHz
PC115    1.10 usec
P115     14.00 usec
P116     82.0000000 W
SFO116   400.2710011 MHz
NUC116   1H
SFO117   100.626192 MHz
PC117    1.10 usec
P117     14.00 usec
P118     82.0000000 W
SFO118   400.2710011 MHz
NUC118   1H
SFO119   100.626192 MHz
PC119    1.10 usec
P119     14.00 usec
P120     82.0000000 W
SFO120   400.2710011 MHz
NUC120   1H
SFO121   100.626192 MHz
PC121    1.10 usec
P121     14.00 usec
P122     82.0000000 W
SFO122   400.2710011 MHz
NUC122   1H
SFO123   100.626192 MHz
PC123    1.10 usec
P123     14.00 usec
P124     82.0000000 W
SFO124   400.2710011 MHz
NUC124   1H
SFO125   100.626192 MHz
PC125    1.10 usec
P125     14.00 usec
P126     82.0000000 W
SFO126   400.2710011 MHz
NUC126   1H
SFO127   100.626192 MHz
PC127    1.10 usec
P127     14.00 usec
P128     82.0000000 W
SFO128   400.2710011 MHz
NUC128   1H
SFO129   100.626192 MHz
PC129    1.10 usec
P129     14.00 usec
P130     82.0000000 W
SFO130   400.2710011 MHz
NUC130   1H
SFO131   100.626192 MHz
PC131    1.10 usec
P131     14.00 usec
P132     82.0000000 W
SFO132   400.2710011 MHz
NUC132   1H
SFO133   100.626192 MHz
PC133    1.10 usec
P133     14.00 usec
P134     82.0000000 W
SFO134   400.2710011 MHz
NUC134   1H
SFO135   100.626192 MHz
PC135    1.10 usec
P135     14.00 usec
P136     82.0000000 W
SFO136   400.2710011 MHz
NUC136   1H
SFO137   100.626192 MHz
PC137    1.10 usec
P137     14.00 usec
P138     82.0000000 W
SFO138   400.2710011 MHz
NUC138   1H
SFO139   100.626192 MHz
PC139    1.10 usec
P139     14.00 usec
P140     82.0000000 W
SFO140   400.2710011 MHz
NUC140   1H
SFO141   100.626192 MHz
PC141    1.10 usec
P141     14.00 usec
P142     82.0000000 W
SFO142   400.2710011 MHz
NUC142   1H
SFO143   100.626192 MHz
PC143    1.10 usec
P143     14.00 usec
P144     82.0000000 W
SFO144   400.2710011 MHz
NUC144   1H
SFO145   100.626192 MHz
PC145    1.10 usec
P145     14.00 usec
P146     82.0000000 W
SFO146   400.2710011 MHz
NUC146   1H
SFO147   100.626192 MHz
PC147    1.10 usec
P147     14.00 usec
P148     82.0000000 W
SFO148   400.2710011 MHz
NUC148   1H
SFO149   100.626192 MHz
PC149    1.10 usec
P149     14.00 usec
P150     82.0000000 W
SFO150   400.2710011 MHz
NUC150   1H
SFO151   100.626192 MHz
PC151    1.10 usec
P151     14.00 usec
P152     82.0000000 W
SFO152   400.2710011 MHz
NUC152   1H
SFO153   100.626192 MHz
PC153    1.10 usec
P153     14.00 usec
P154     82.0000000 W
SFO154   400.2710011 MHz
NUC154   1H
SFO155   100.626192 MHz
PC155    1.10 usec
P155     14.00 usec
P156     82.0000000 W
SFO156   400.2710011 MHz
NUC156   1H
SFO157   100.626192 MHz
PC157    1.10 usec
P157     14.00 usec
P158     82.0000000 W
SFO158   400.2710011 MHz
NUC158   1H
SFO159   100.626192 MHz
PC159    1.10 usec
P159     14.00 usec
P160     82.0000000 W
SFO160   400.2710011 MHz
NUC160   1H
SFO161   100.626192 MHz
PC161    1.10 usec
P161     14.00 usec
P162     82.0000000 W
SFO162   400.2710011 MHz
NUC162   1H
SFO163   100.626192 MHz
PC163    1.10 usec
P163     14.00 usec
P164     82.0000000 W
SFO164   400.2710011 MHz
NUC164   1H
SFO165   100.626192 MHz
PC165    1.10 usec
P165     14.00 usec
P166     82.0000000 W
SFO166   400.2710011 MHz
NUC166   1H
SFO167   100.626192 MHz
PC167    1.10 usec
P167     14.00 usec
P168     82.0000000 W
SFO168   400.2710011 MHz
NUC168   1H
SFO169   100.626192 MHz
PC169    1.10 usec
P169     14.00 usec
P170     82.0000000 W
SFO170   400.2710011 MHz
NUC170   1H
SFO171   100.626192 MHz
PC171    1.10 usec
P171     14.00 usec
P172     82.0000000 W
SFO172   400.2710011 MHz
NUC172   1H
SFO173   100.626192 MHz
PC173    1.10 usec
P173     14.00 usec
P174     82.0000000 W
SFO174   400.2710011 MHz
NUC174   1H
SFO175   100.626192 MHz
PC175    1.10 usec
P175     14.00 usec
P176     82.0000000 W
SFO176   400.2710011 MHz
NUC176   1H
SFO177   100.626192 MHz
PC177    1.10 usec
P177     14.00 usec
P178     82.0000000 W
SFO178   400.2710011 MHz
NUC178   1H
SFO179   100.626192 MHz
PC179    1.10 usec
P179     14.00 usec
P180     82.0000000 W
SFO180   400.2710011 MHz
NUC180   1H
SFO181   100.626192 MHz
PC181    1.10 usec
P181     14.00 usec
P182     82.0000000 W
SFO182   400.2710011 MHz
NUC182   1H
SFO183   100.626192 MHz
PC183    1.10 usec
P183     14.00 usec
P184     82.0000000 W
SFO184   400.2710011 MHz
NUC184   1H
SFO185   100.626192 MHz
PC185    1.10 usec
P185     14.00 usec
P186     82.0000000 W
SFO186   400.2710011 MHz
NUC186   1H
SFO187   100.626192 MHz
PC187    1.10 usec
P187     14.00 usec
P188     82.0000000 W
SFO188   400.2710011 MHz
NUC188   1H
SFO189   100.626192 MHz
PC189    1.10 usec
P189     14.00 usec
P190     82.0000000 W
SFO190   400.2710011 MHz
NUC190   1H
SFO191   100.626192 MHz
PC191    1.10 usec
P191     14.00 usec
P192     82.0000000 W
SFO192   400.2710011 MHz
NUC192   1H
SFO193   100.626192 MHz
PC193    1.10 usec
P193     14.00 usec
P194     82.0000000 W
SFO194   400.2710011 MHz
NUC194   1H
SFO195   100.626192 MHz
PC195    1.10 usec
P195     14.00 usec
P196     82.0000000 W
SFO196   400.2710011 MHz
NUC196   1H
SFO197   100.626192 MHz
PC197    1.10 usec
P197     14.00 usec
P198     82.0000000 W
SFO198   400.2710011 MHz
NUC198   1H
SFO199   100.626192 MHz
PC199    1.10 usec
P199     14.00 usec
P200     82.0000000 W
SFO200   400.2710011 MHz
NUC200   1H
SFO201   100.626192 MHz
PC201    1.10 usec
P201     14.00 usec
P202     82.0000000 W
SFO202   400.2710011 MHz
NUC202   1H
SFO203   100.626192 MHz
PC203    1.10 usec
P203     14.00 usec
P204     82.0000000 W
SFO204   400.2710011 MHz
NUC204   1H
SFO205   100.626192 MHz
PC205    1.10 usec
P205     14.00 usec
P206     82.0000000 W
SFO206   400.2710011 MHz
NUC206   1H
SFO207   100.626192 MHz
PC207    1.10 usec
P207     14.00 usec
P208     82.0000000 W
SFO208   400.2710011 MHz
NUC208   1H
SFO209   100.626192 MHz
PC209    1.10 usec
P209     14.00 usec
P210     82.0000000 W
SFO210   400.2710011 MHz
NUC210   1H
SFO211   100.626192 MHz
PC211    1.10 usec
P211     14.00 usec
P212     82.0000000 W
SFO212   400.2710011 MHz
NUC212   1H
SFO213   100.626192 MHz
PC213    1.10 usec
P213     14.00 usec
P214     82.0000000 W
SFO214   400.2710011 MHz
NUC214   1H
SFO215   100.626192 MHz
PC215    1.10 usec
P215     14.00 usec
P216     82.0000000 W
SFO216   400.2710011 MHz
NUC216   1H
SFO217   100.626192 MHz
PC217    1.10 usec
P217     14.00 usec
P218     82.0000000 W
SFO218   400.2710011 MHz
NUC218   1H
SFO219   100.626192 MHz
PC219    1.10 usec
P219     14.00 usec
P220     82.0000000 W
SFO220   400.2710011 MHz
NUC220   1H
SFO221   100.626192 MHz
PC221    1.10 usec
P221     14.00 usec
P222     82.0000000 W
SFO222   400.2710011 MHz
NUC222   1H
SFO223   100.626192 MHz
PC223    1.10 usec
P223     14.00 usec
P224     82.0000000 W
SFO224   400.2710011 MHz
NUC224   1H
SFO225   100.626192 MHz
PC225    1.10 usec
P225     14.00 usec
P226     82.0000000 W
SFO226   400.2710011 MHz
NUC226   1H
SFO227   100.626192 MHz
PC227    1.10 usec
P227     14.00 usec
P228     82.0000000 W
SFO228   400.2710011 MHz
NUC228   1H
SFO229   100.626192 MHz
PC229    1.10 usec
P229     14.00 usec
P230     82.0000000 W
SFO230   400.2710011 MHz
NUC230   1H
SFO231   100.626192 MHz
PC231    1.10 usec
P231     14.00 usec
P232     82.0000000 W
SFO232   400.2710011 MHz
NUC232   1H
SFO233   100.626192 MHz
PC233    1.10 usec
P233     14.00 usec
P234     82.0000000 W
SFO234   400.2710011 MHz
NUC234   1H
SFO235   100.626192 MHz
PC235    1.10 usec
P235     14.00 usec
P236     82.0000000 W
SFO236   400.2710011 MHz
NUC236   1H
SFO237   100.626192 MHz
PC237    1.10 usec
P237     14.00 usec
P238     82.0000000 W
SFO238   400.2710011 MHz
NUC238   1H
SFO239   100.626192 MHz
PC239    1.10 usec
P239     14.00 usec
P240     82.0000000 W
SFO240   400.2710011 MHz
NUC240   1H
SFO241   100.626192 MHz
PC241    1.10 usec
P241     14.00 usec
P242     82.0000000 W
SFO242   400.2710011 MHz
NUC242   1H
SFO243   100.626192 MHz
PC243    1.10 usec
P243     14
```

8.586  
8.584  
8.566  
8.561  
8.561  
7.938  
7.920  
7.916  
7.592  
7.586  
7.574  
7.546  
7.526  
7.509  
7.452  
7.432  
7.412  
7.409  
7.363  
7.361  
7.343  
7.324  
7.260  
7.111  
7.107  
7.089  
7.072  
7.068

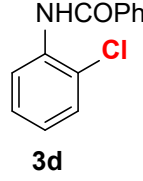

```

Current Data Parameters
NAME      I111976
EXPNO    10
PROCNO   1
F2 - Acquisition Parameters
Date_    20221113
Time     9.14
INSTRUM  Avance
PROBHD   1163739_019 Q
PULPROG  zgpg30
TD       65536
SOLVENT  CDCl3
NS       16
DS       4
SWH      8194.722 Hz
FIDRES   0.350144 Hz
AQ       3.997855 sec
RG        320
DE       61.000 umsec
TE       300.2 K
D1       1.00000000 sec
D11      0.00000000 sec
TDO      400.2714117 MHz
NUC1     13
NUC2     13
PC       2.01 umsec
P1       1.54 umsec
PCMR    34.00000000 W
F2 - Processing parameters
SI       45536
SF       400.270904 MHz
WDW      EM
SSB      0
LB       0.30 Hz
GB       0
PC       1.00
  
```

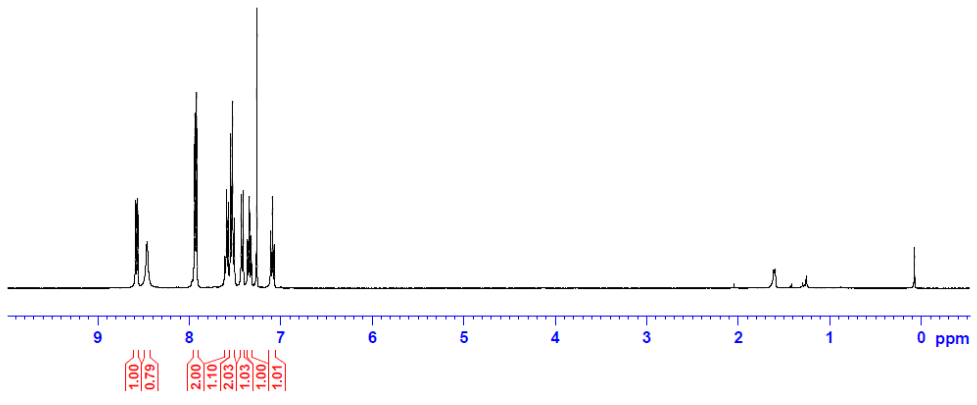

165.43

134.85  
134.73  
132.35  
129.17  
129.10  
128.04  
127.23  
124.89  
123.13  
121.60

77.48  
77.16  
76.84

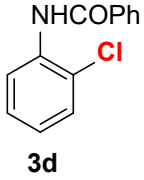

```

Current Data Parameters
NAME      I111976C
EXPNO    10
PROCNO   1
F2 - Acquisition Parameters
Date_    20221113
Time     10.41
INSTRUM  Avance
PROBHD   1163739_019 Q
PULPROG  zgpg30
TD       65536
SOLVENT  CDCl3
NS       16
DS       4
SWH      23895.523 Hz
FIDRES   1.3742560 Hz
AQ       3.997855 sec
RG        320
DE       61.000 umsec
TE       300.2 K
D1       0.00000000 sec
D11      0.00000000 sec
TDO      100.6260364 MHz
NUC1     13
NUC2     13
PC       1.21 umsec
P1       1.54 umsec
P1MR    34.00000000 W
PCMR    34.00000000 W
CPHASE2  waltz16
PCPD2   36.00 umsec
P1MR2   0.18480000 W
P1MR3   0.18480000 W
P1MR4   0.08477000 W
F2 - Processing parameters
SI       30720
SF       100.6278607 MHz
WDW      EM
SSB      0
LB       1.00 Hz
GB       0
PC       1.40
  
```

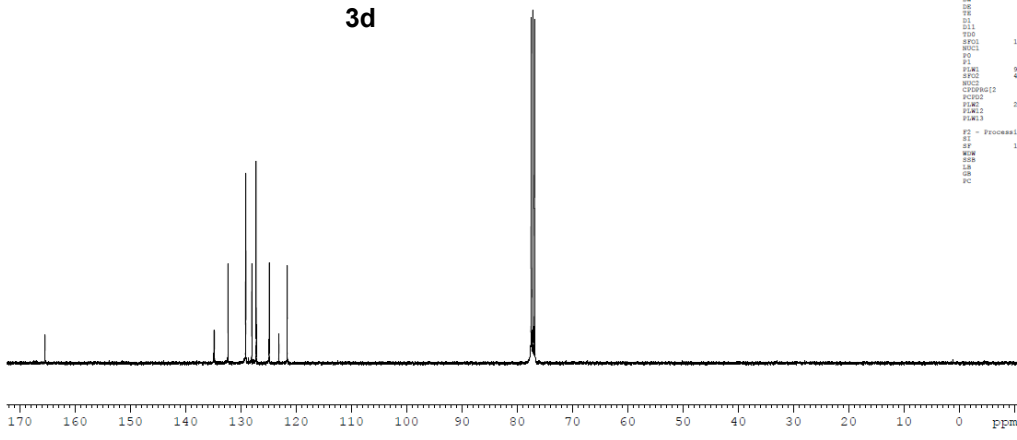

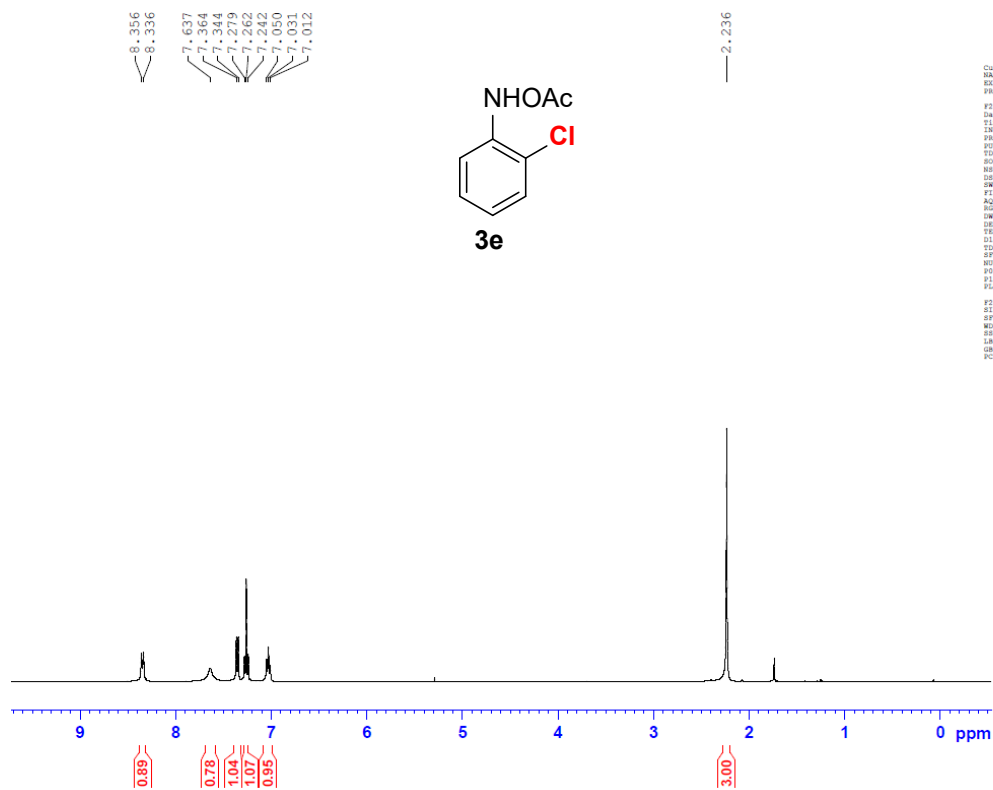

```

Current Data Parameters
NAME      11u195b-3e
EXPNO    10
PROCNO   1
F2 - Acquisition Parameters
Date_    20220121
Time     15.59 h
INSTRUM  Avance
PROBHD   5163739_0313
PULPROG  zgpg30
TD        65536
SOLVENT  CDCl3
NS        16
DS        4
SWH       8106.722 Hz
FIDRES   0.358144 Hz
AQ        3.9778029 sec
RG        101
WDW       61.000 usec
DE        18.96 usec
TE        298.2 K
D1        1.0000000 sec
TSD
SFO1     400.2724717 MHz
NUC1      13
PC        2.51 usec
SI        1.64 usec
PEM1     24.0000000 W
F2 - Processing parameters
SI        65536
SF        400.2700888 MHz
WDW       60
SSB       0.30 Hz
LB        0.30 Hz
GB        1.00
PC        1.40

```

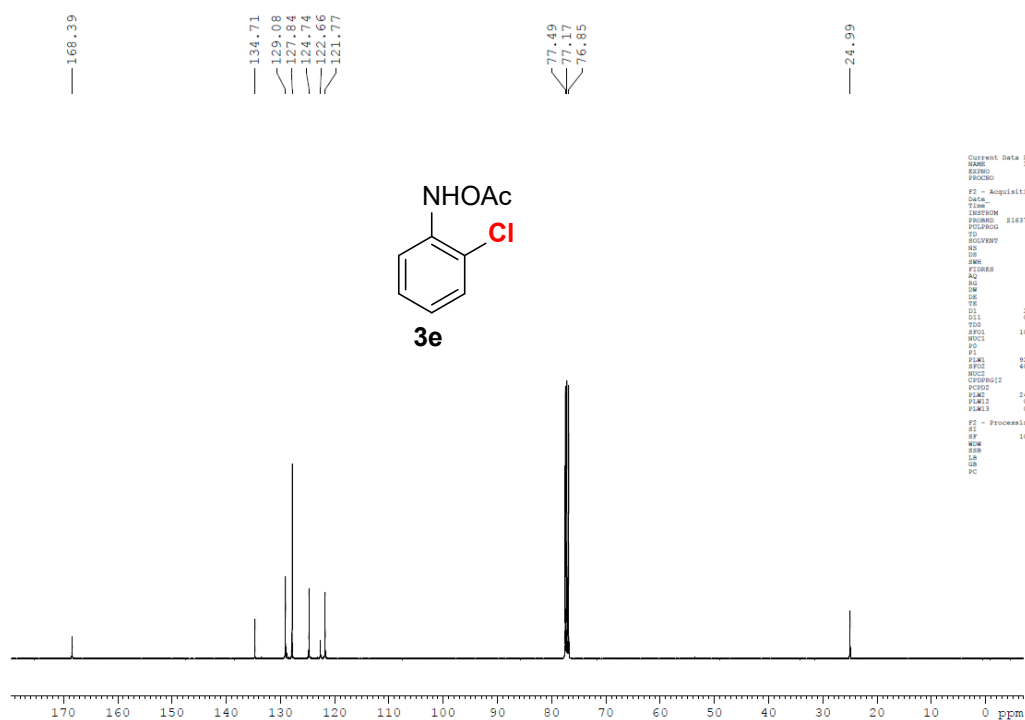

```

Current Data Parameters
NAME      11u195b-3e
EXPNO    12
PROCNO   1
F2 - Acquisition Parameters
Date_    20220121
Time     16.02 h
INSTRUM  Avance
PROBHD   5163739_0313
PULPROG  zgpg30
TD        65536
SOLVENT  CDCl3
NS        5000
DS        4
SWH       23800.523 Hz
FIDRES   0.256600 Hz
AQ        1.374126 sec
RG        101
WDW       21.000 usec
DE        6.50 usec
TE        298.2 K
D1        2.0000000 sec
TSD
SFO1     100.6261364 MHz
NUC1      13
PC        2.47 usec
SI        65536
PEM1     92.0000000 W
PEM2     400.2714013 MHz
PCPGM12  waltz16
NUC2      15
PCPGM12  wait140
PEM2     24.0000000 W
PEM3     0.1048000 W
PEM3     0.08472300 W
F2 - Processing parameters
SI        65536
SF        100.6478614 MHz
WDW       60
SSB       1.00 Hz
LB        1.00 Hz
GB        1.40
PC        1.40

```



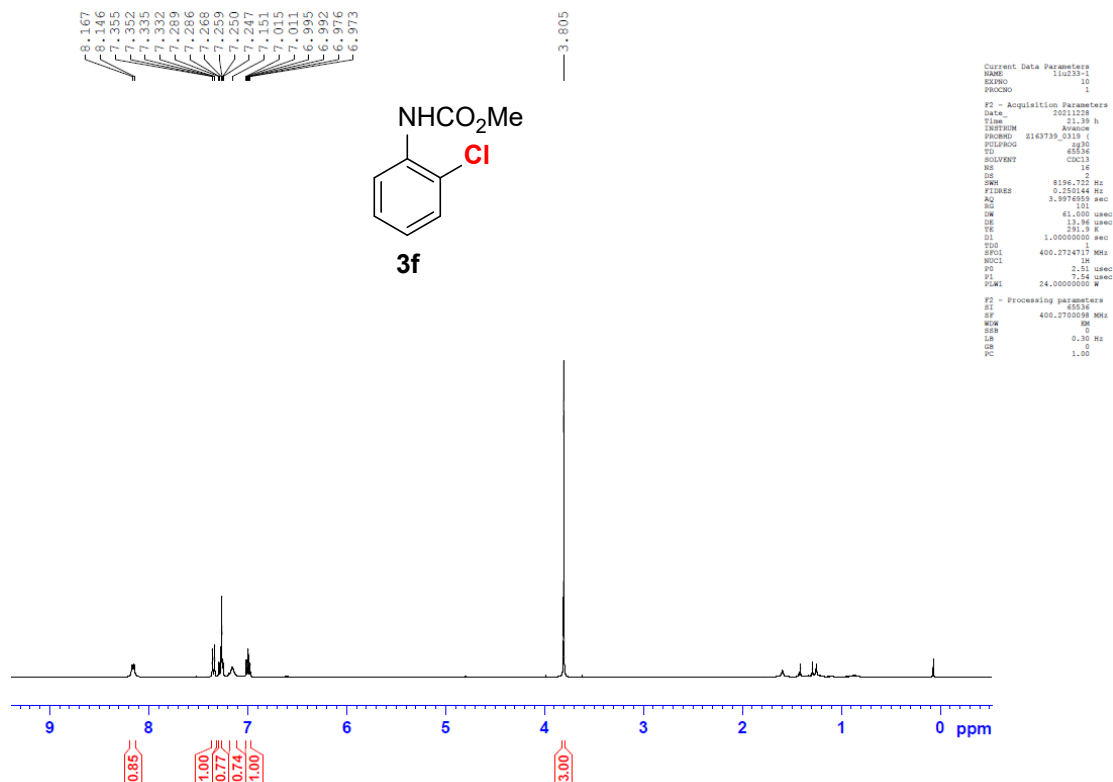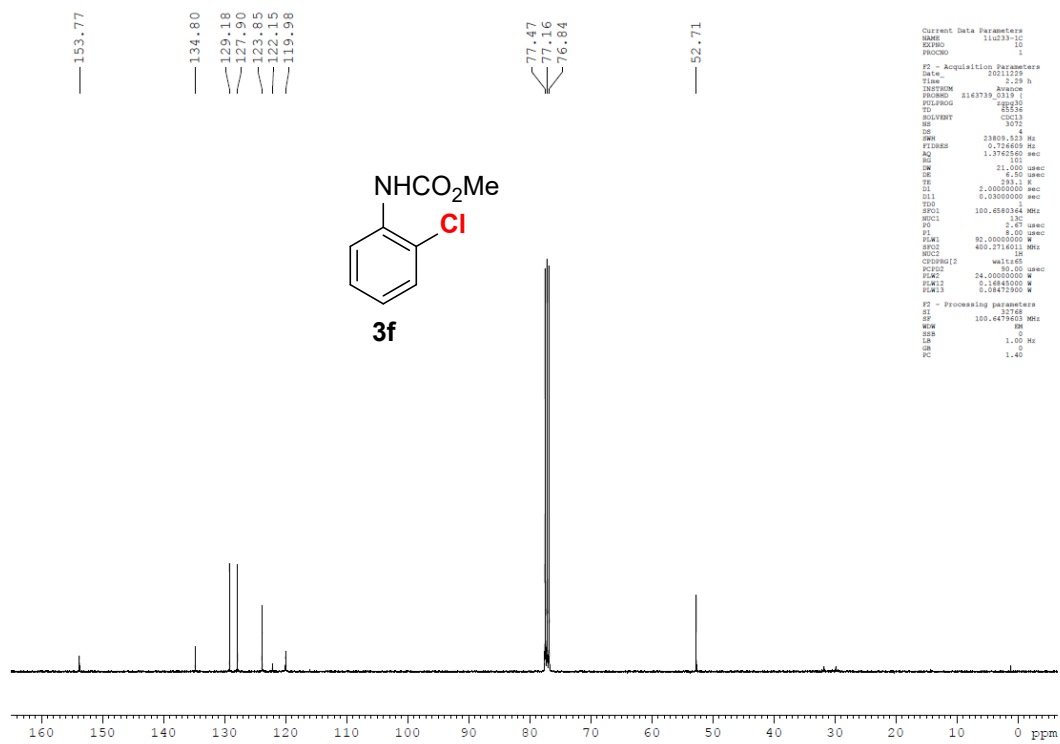

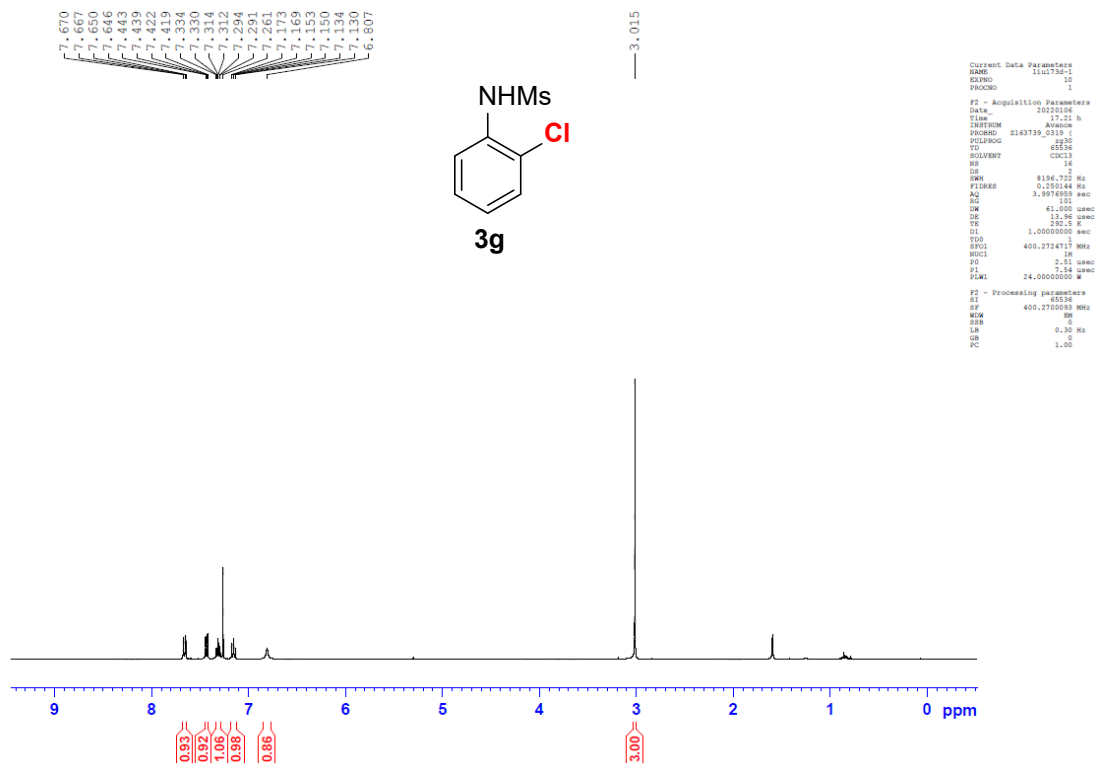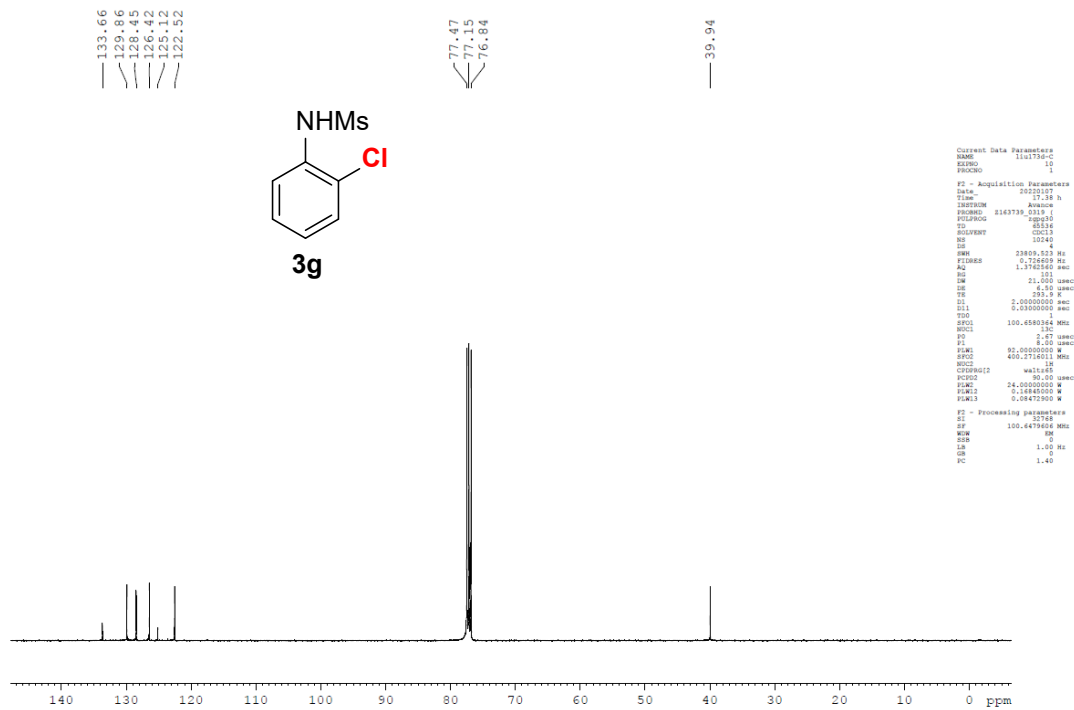

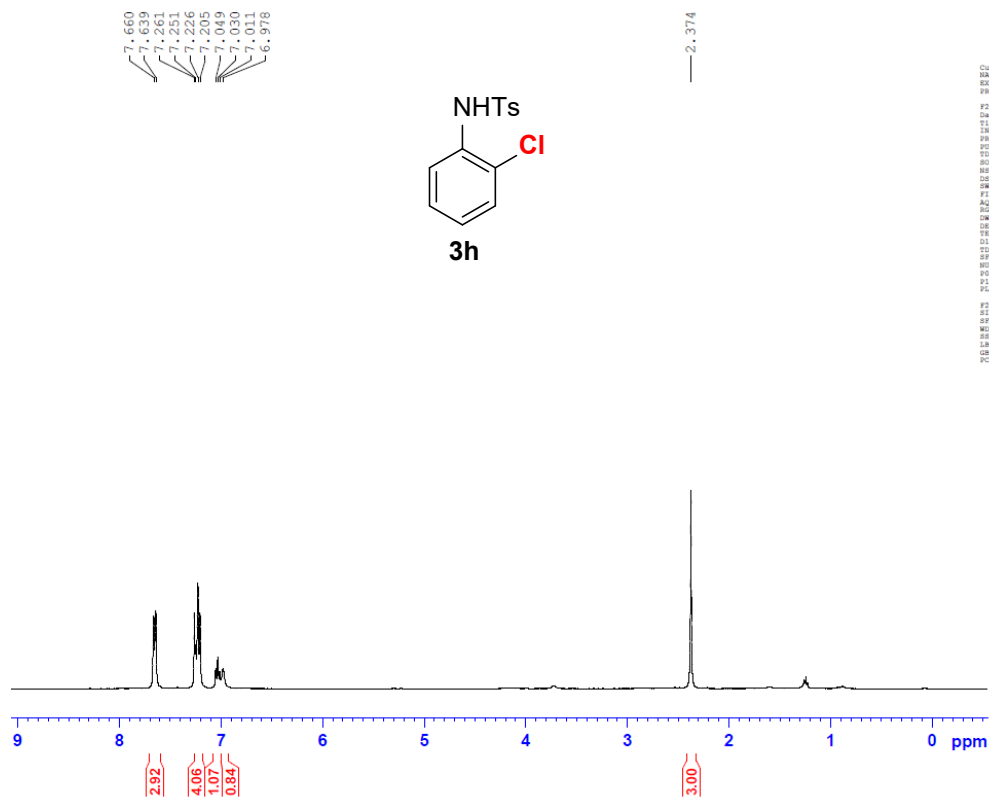

```

Current Data Parameters
NAME      11u172b
EXPNO    1
PROCNO   1
F2 - Acquisition Parameters
Date_    201126
Time     18.54 h
INSTRUM  Avance
PROBHD   2163739_0319 (
PULPROG  zgpg30
TD       65536
SOLVENT  CDCl3
NS       16
DS       8190.722 Hz
FIDRES   0.250144 Hz
AQ       3.9976909 sec
RG       101
DM       61.000 usec
DE       12.92 usec
TE       291.2 K
D1       1.0000000 sec
D11      0.0000000 sec
SFO1     400.274717 MHz
NUC1      1H
PC       2.51 usec
PI       9.14 usec
PWL1     24.0000000 W
F2 - Processing parameters
SI       65536
SF       400.2700090 MHz
WDW      EM
SSB      0
LB       0.30 Hz
GB       0
PC       1.00
  
```

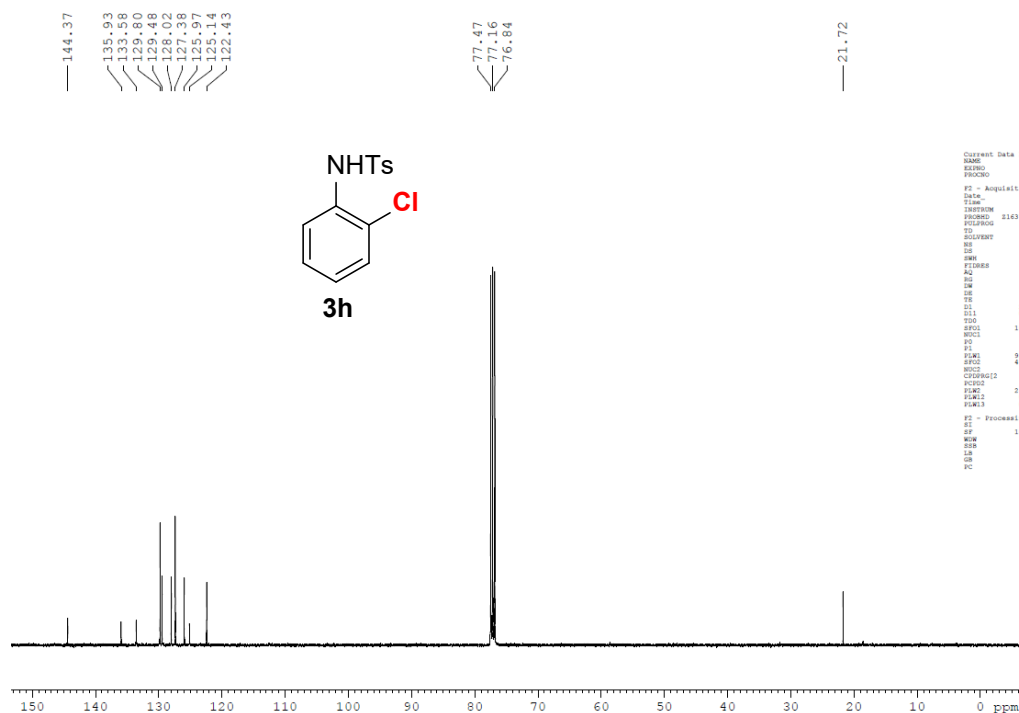

```

Current Data Parameters
NAME      11u172b
EXPNO    1
PROCNO   1
F2 - Acquisition Parameters
Date_    201126
Time     21.14 h
INSTRUM  Avance
PROBHD   2163739_0319 (
PULPROG  zgpg30
TD       65536
SOLVENT  CDCl3
NS       16
DS       28803.923 Hz
FIDRES   0.716203 Hz
AQ       1.3762050 sec
RG       10
DM       21.000 usec
DE       6.40 usec
TE       292.2 K
D1       2.0000000 sec
D11      0.0000000 sec
SFO1     100.626104 MHz
NUC1      13C
PC       8.00 usec
PI       92.0000000 W
SFO2     400.2716111 MHz
NUC2      1H
CPDPRG2  waltz16
PCPD2    80.00 usec
FREQ     24.0000000 MHz
PWL1     0.1884300 W
PWL2     0.1884300 W
PWL3     0.0847300 W
F2 - Processing parameters
SI       65536
SF       100.6479610 MHz
WDW      EM
SSB      0
LB       1.00 Hz
GB       0
PC       1.40
  
```

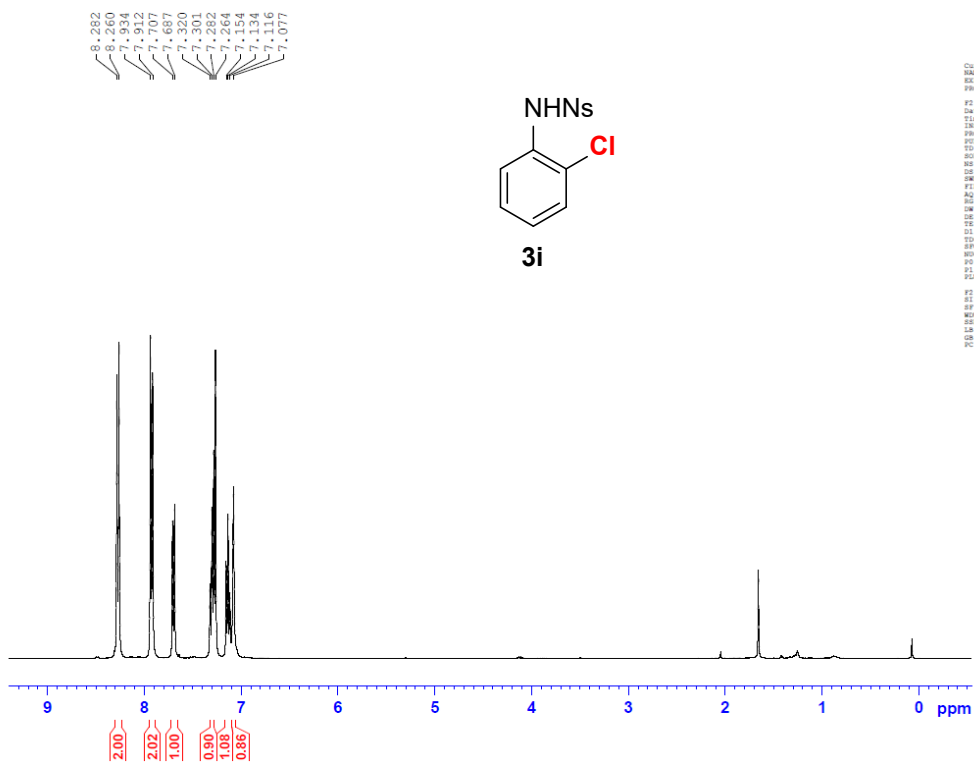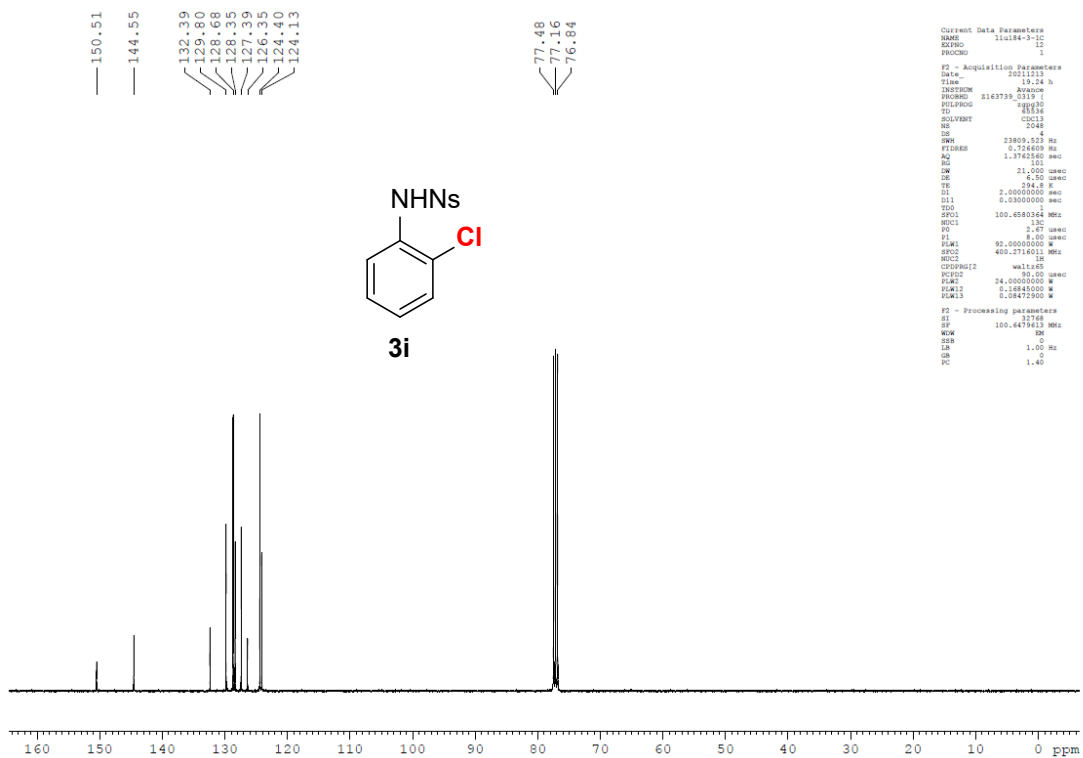

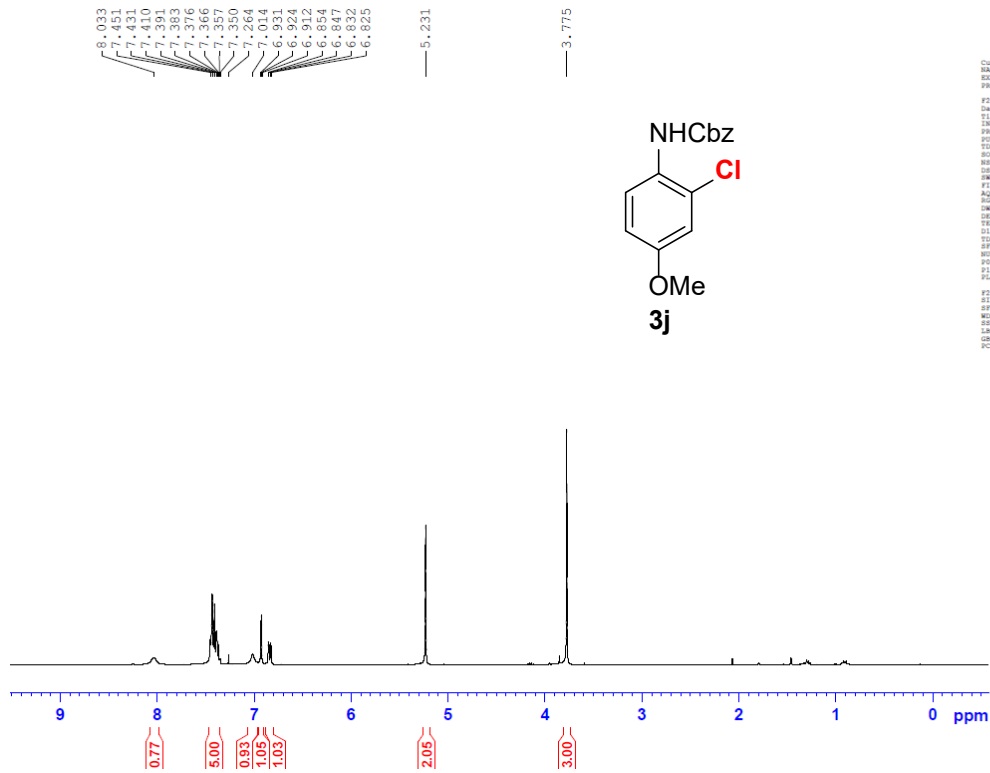

```

Current Data Parameters
NAME      11375
EXPNO     10
PROCNO    1

F2 - Acquisition Parameters
Date_     2021127
Time      14.36 h
INSTRUM   Avance
PROBHD    BBO-5mm
PULPROG   zgpg30
TD         65536
SOLVENT   CDCl3
NS         16
DS         4
SWH        8196.725 Hz
FIDRES     0.25144 Hz
AQ         3.9974958 sec
RG         320
DM         61.000 usec
DE         19.00 usec
TE         301.15 K
D1         1.00000000 sec
SFO        400.274717 MHz
NUC1       13C
NUC2       1H
PC         2.51 usec
PL1        0.00 usec
PL2        24.00000000 M
PL3        0.00 usec

F2 - Processing parameters
SI         65536
SF         400.270076 MHz
WDW        EM
SSB        0
LB         0.30 Hz
GB         0
PC         1.00
  
```

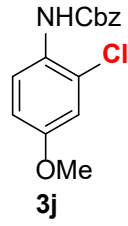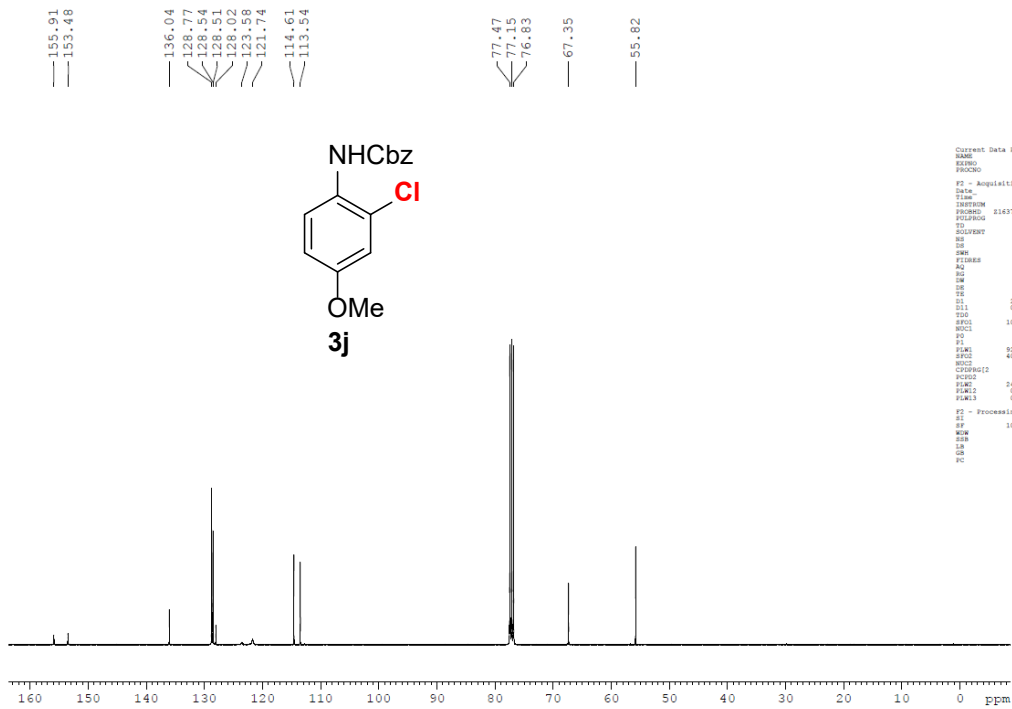

```

Current Data Parameters
NAME      1139C-1
EXPNO     11
PROCNO    1

F2 - Acquisition Parameters
Date_     20220110
Time      21.28 h
INSTRUM   Avance
PROBHD    BBO-5mm
PULPROG   zgpg30
TD         65536
SOLVENT   CDCl3
NS         16
DS         4
SWH        23809.523 Hz
FIDRES     0.25460 Hz
AQ         1.3740360 sec
RG         320
DM         61.000 usec
DE         19.00 usec
TE         301.15 K
D1         1.00000000 sec
SFO        400.274717 MHz
NUC1       13C
NUC2       1H
PC         2.51 usec
PL1        0.00 usec
PL2        24.00000000 M
PL3        0.00 usec
PL4        0.00 usec
PL5        0.00 usec

F2 - Processing parameters
SI         65536
SF         100.647811 MHz
WDW        EM
SSB        0
LB         1.00 Hz
GB         0
PC         1.40
  
```

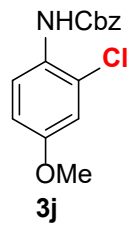

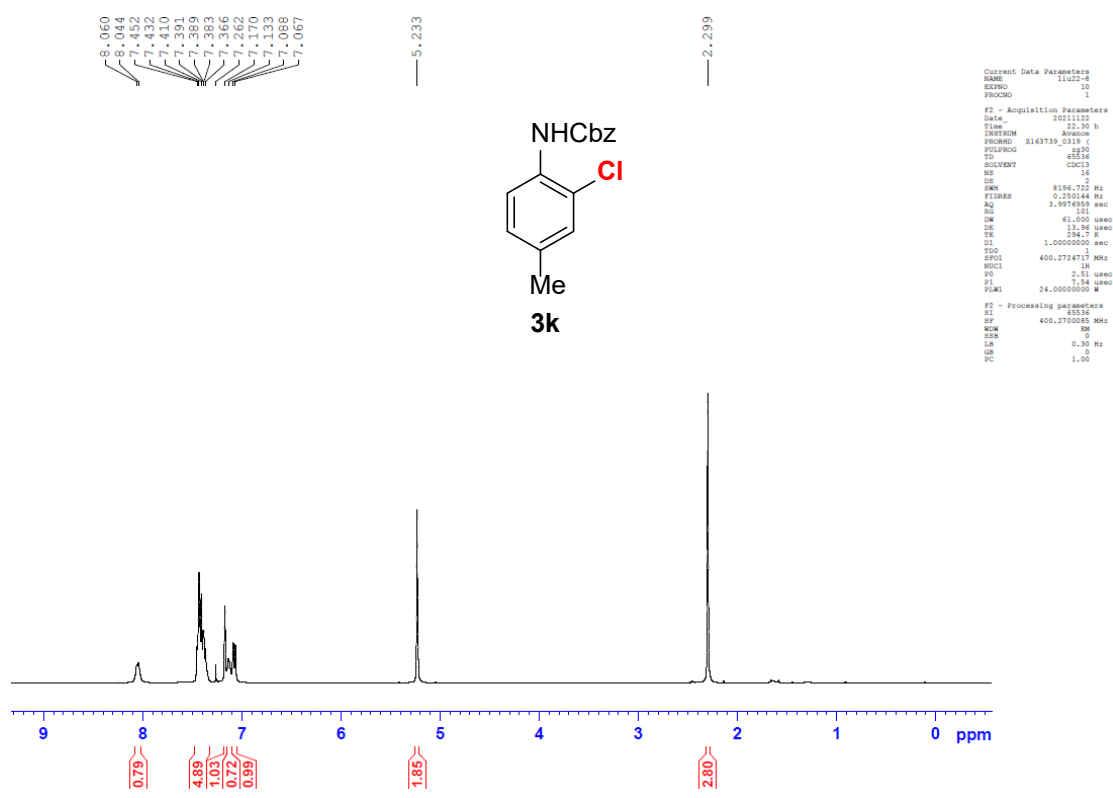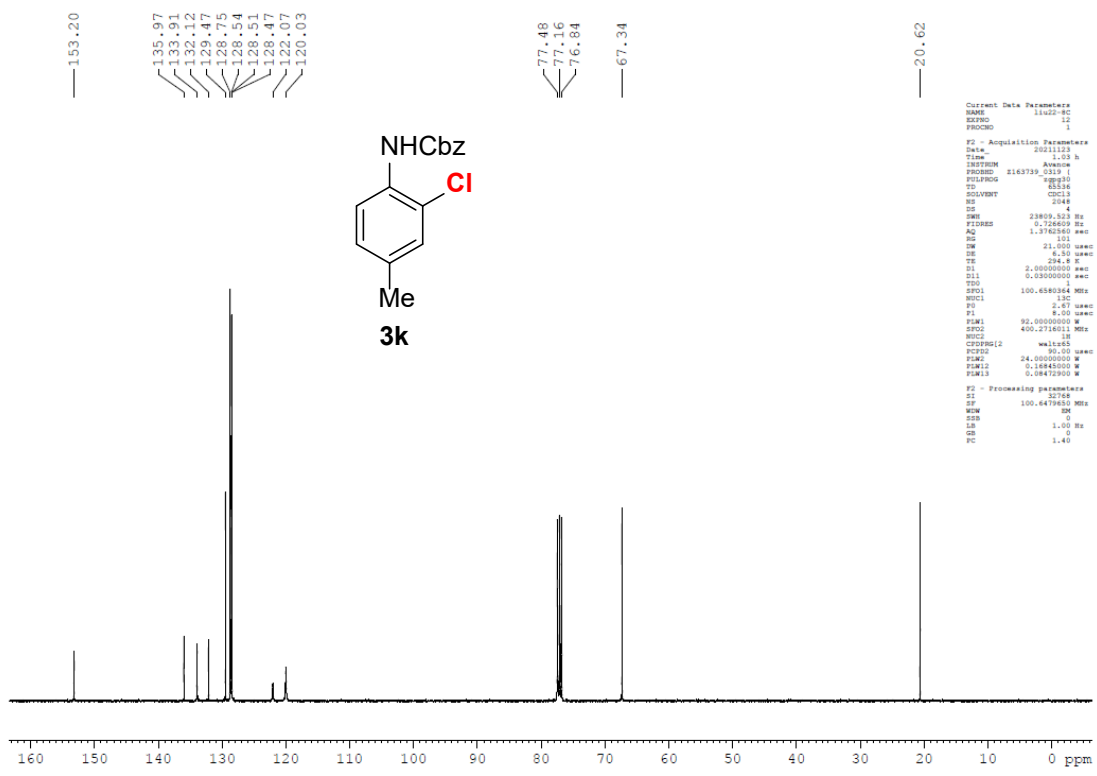

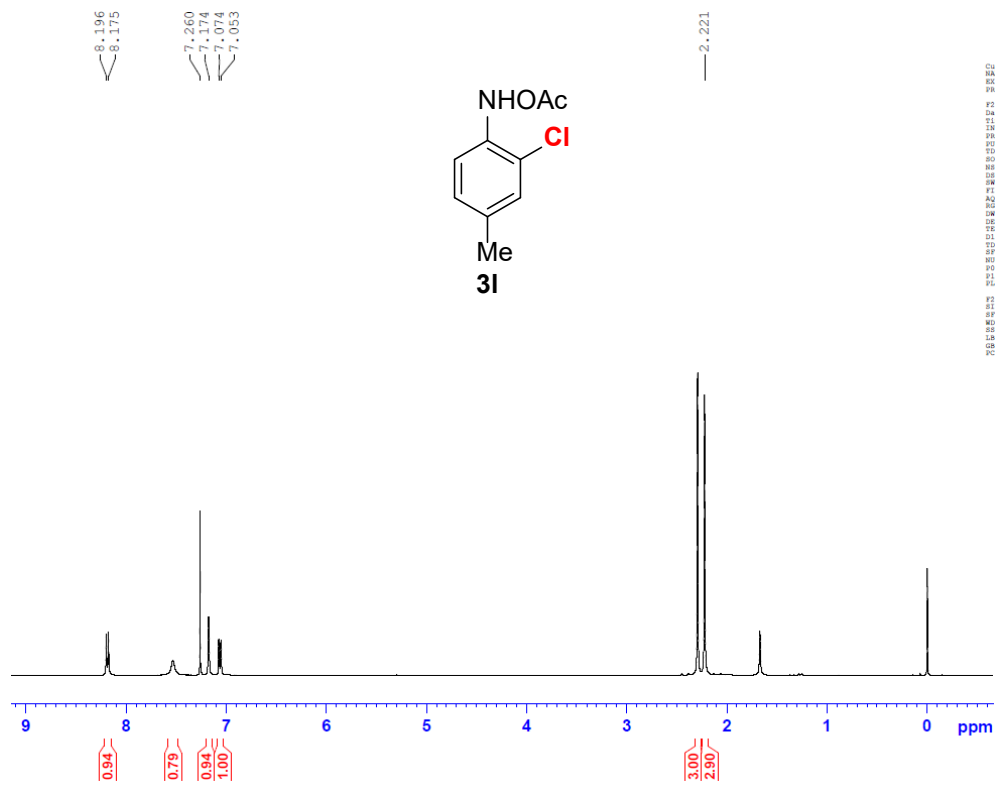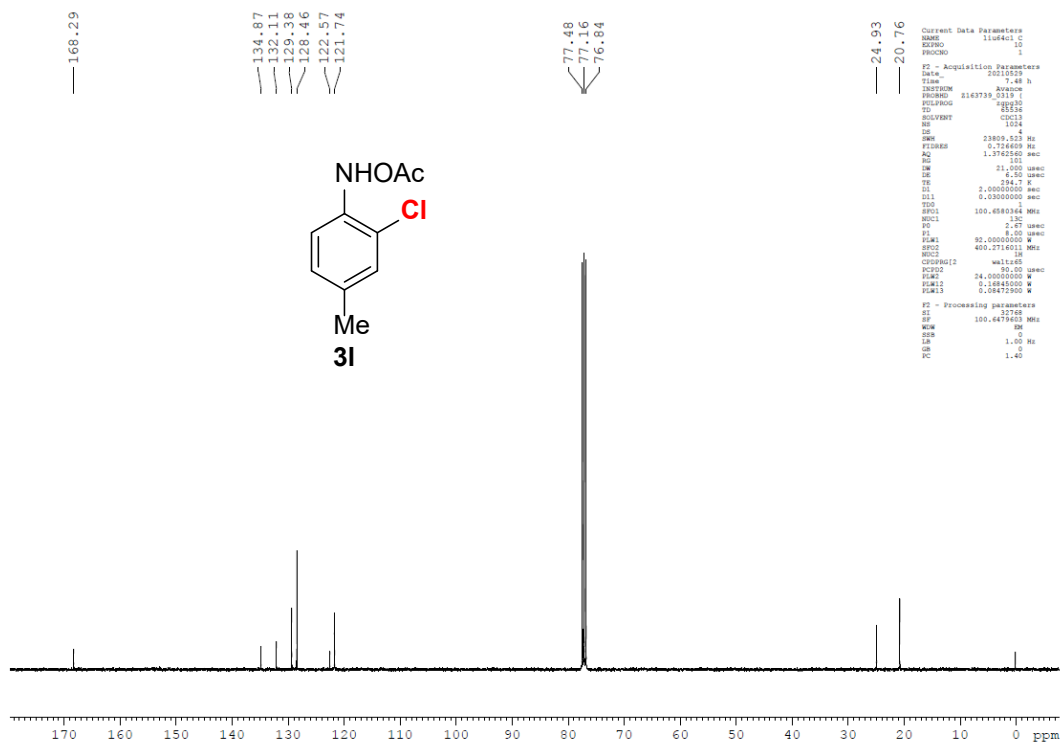

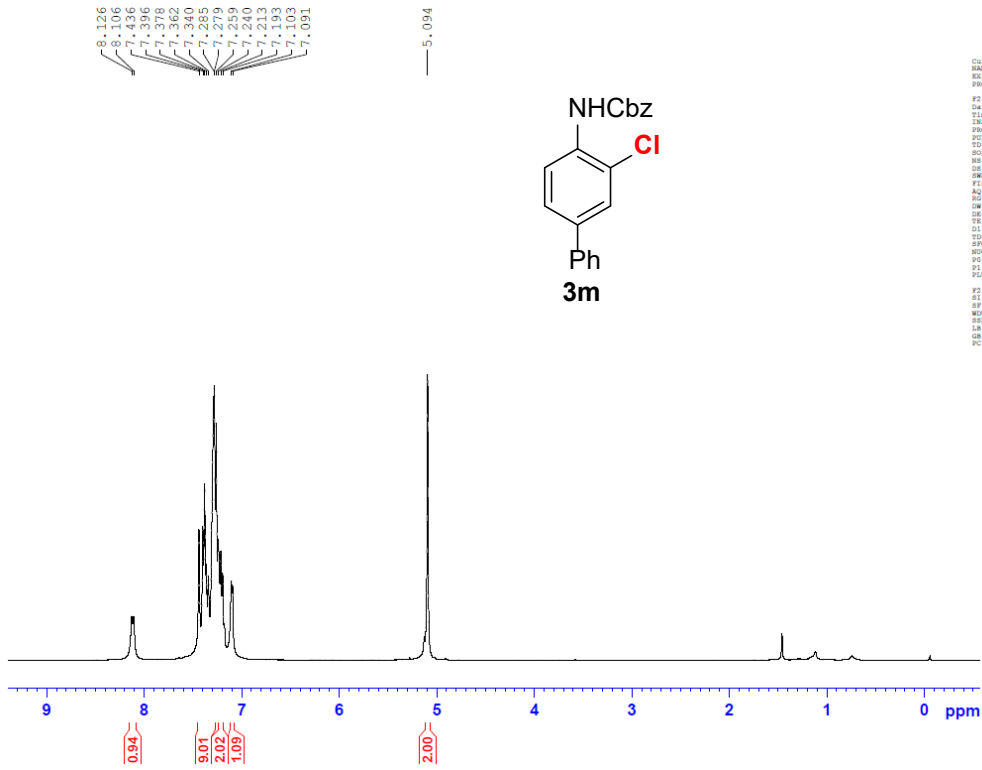

```

Current Data Parameters
NAME      116246
EXPNO    12
PROCNO   1
F2 - Acquisition Parameters
Date_    202303
Time     21.28 h
INSTRUM  Agilent
PROBHD   5163739_0319
PULPROG  zgpg30
TD        65536
SOLVENT  CDCl3
NS        16
DS        4
SWH       8196.712 Hz
FIDRES   0.250144 Hz
AQ        3.9749328 sec
RG        65
SW        61.000 usec
DE        131.96 usec
TE        298.2 K
D1        1.00000000 sec
TDS       400.2724717 MHz
SFO1      400.1410151 MHz
PC        1.51 usec
PI        1.54 usec
PL1       24.0000000 W
F2 - Processing parameters
SI        65536
SF        400.2700769 MHz
WDW       EM
SSB       0
LR        0.30 Hz
GB        1.00
PC        1.00
  
```

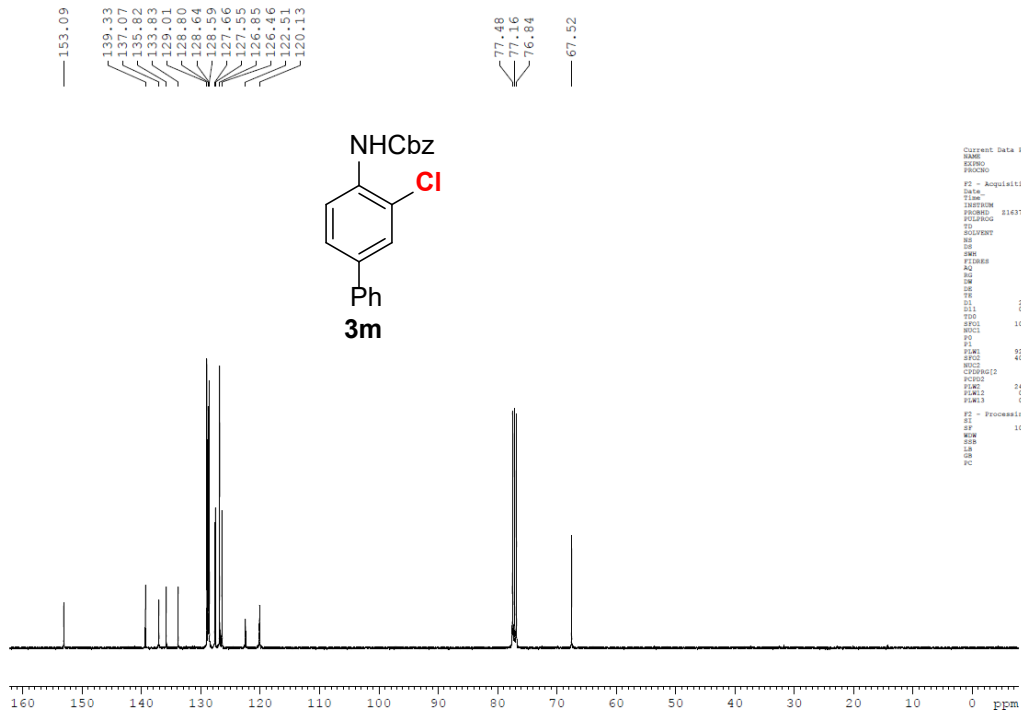

```

Current Data Parameters
NAME      116246
EXPNO    12
PROCNO   1
F2 - Acquisition Parameters
Date_    202303
Time     22.33 h
INSTRUM  Agilent
PROBHD   5163739_0319
PULPROG  zgpg30
TD        65536
SOLVENT  CDCl3
NS        16
DS        4
SWH       33604.101 Hz
FIDRES   0.724660 Hz
AQ        1.1718261 sec
RG        100
SW        211.000 usec
DE        4.50 usec
TE        291.2 K
D1        1.00000000 sec
D11       0.03000000 sec
TDS       100.6580364 MHz
SFO1      100.6261252 MHz
PC        1.51 usec
PI        1.54 usec
PL1       24.0000000 W
PLM1     0.0000000 W
PLM2     0.0000000 W
PLM3     0.0000000 W
PLM4     0.0000000 W
F2 - Processing parameters
SI        65536
SF        100.6261252 MHz
WDW       EM
SSB       0
LR        1.00 Hz
GB        1.00
PC        1.00
  
```



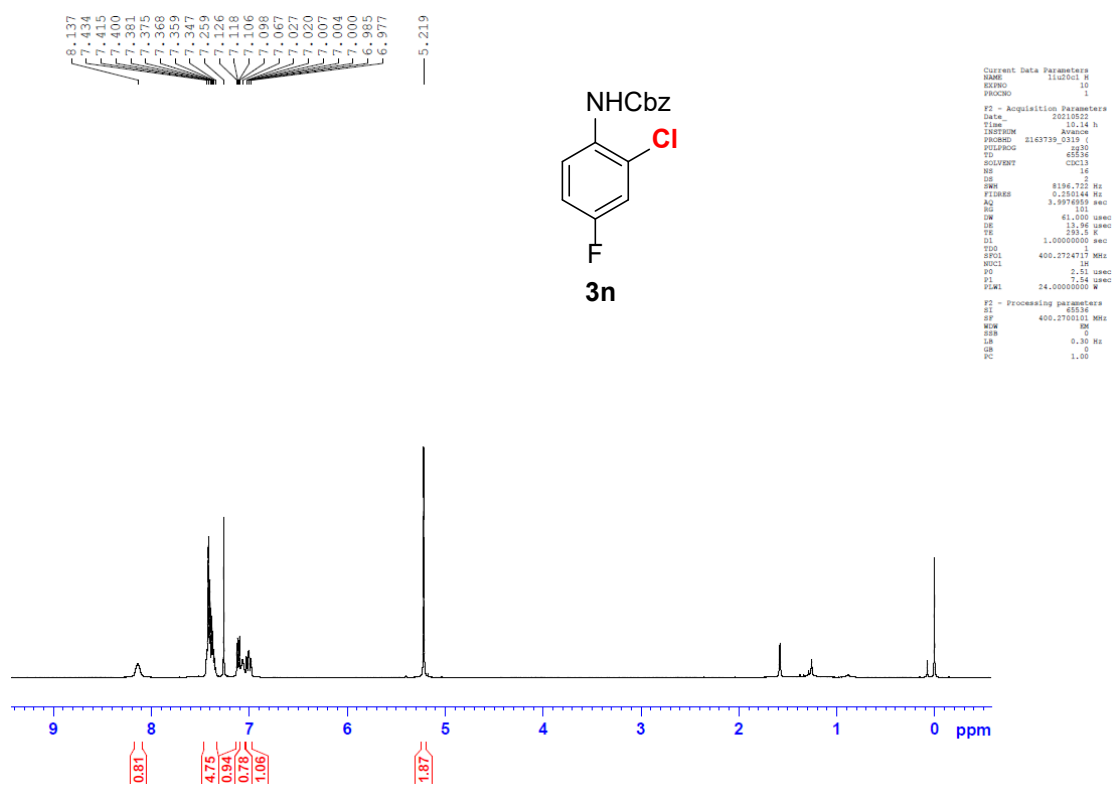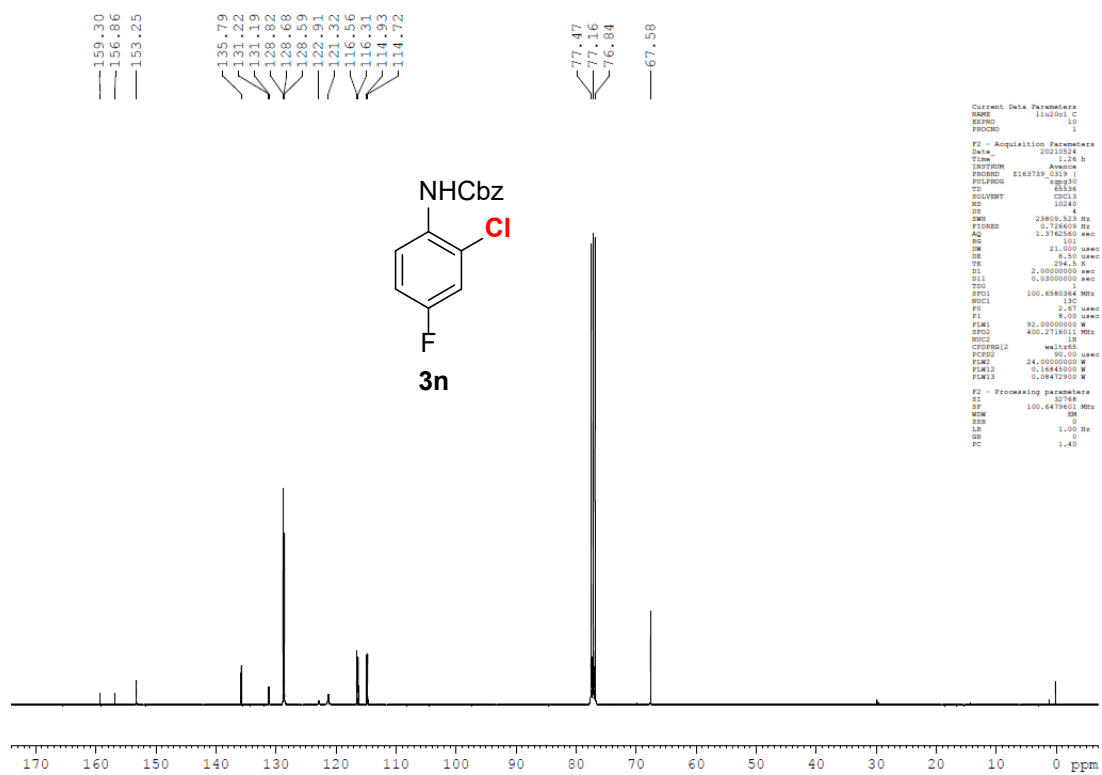

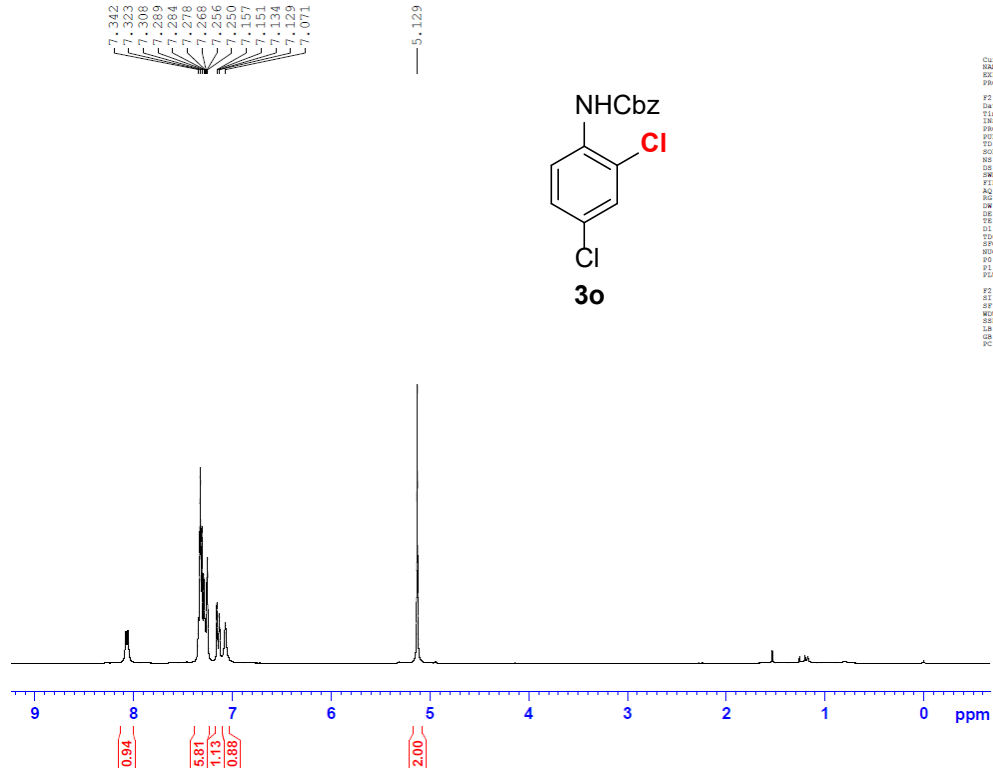

```

Current Data Parameters
NAME      1163739_0319
PROCNO    1
F2 - Acquisition Parameters
Date_     20211124
Time      22.45 h
INSTRUM   Avance
PROBHD    513739_0319 (
PULPROG   zgpg30
TD         65536
SOLVENT   CDCl3
NS         16
DS         2
SWH        8106.732 Hz
FIDRES     0.105144 Hz
AQ         3.8976959 sec
RG         51.616
DM         61.000 usec
DE         13.46 usec
TE         300.2 K
D1         1.00000000 sec
d11        1
D12        1
SFO1       400.274717 MHz
SFO2       101.253210 MHz
NUC1       13C
NUC2       1H
PC         2.51 usec
PE         9.16 usec
PL1        24.00000000 W
PL2        0.00000000 W
F2 - Processing parameters
SI         32768
SF         100.626184 MHz
SF2        400.2700504 MHz
WDW        EM
SSB        0
LB         0.30 Hz
GB         0
PC         1.00
  
```

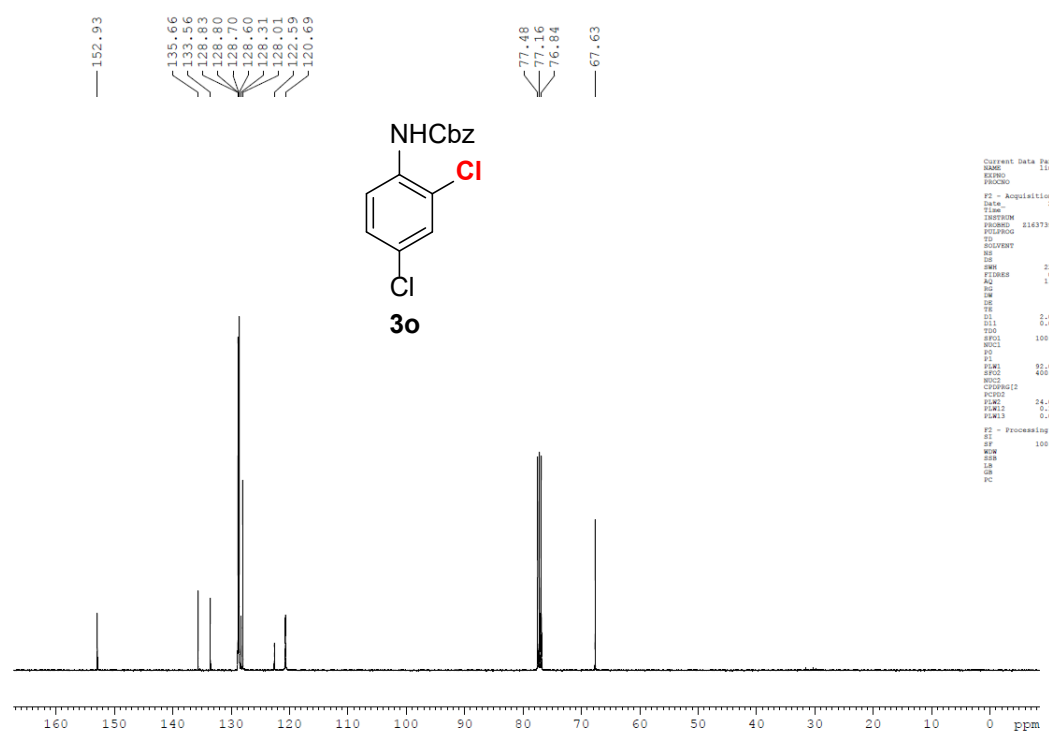

```

Current Data Parameters
NAME      1163739_0319
PROCNO    1
F2 - Acquisition Parameters
Date_     20211124
Time      0.48 h
INSTRUM   Avance
PROBHD    513739_0319 (
PULPROG   zgpg30
TD         65536
SOLVENT   CDCl3
NS         16
DS         2
SWH        23809.302 Hz
FIDRES     0.726699 Hz
AQ         1.3746366 sec
RG         101
DM         21.000 usec
DE         2.50 usec
TE         300.2 K
D1         2.00000000 sec
d11        0.30000000 sec
D12        1
SFO1       100.626184 MHz
SFO2       400.2716011 MHz
NUC1       13C
NUC2       1H
PC         2.51 usec
PE         9.16 usec
PL1        24.00000000 W
PL2        0.00000000 W
F2 - Processing parameters
SI         32768
SF         100.626184 MHz
SF2        400.2700504 MHz
WDW        EM
SSB        0
LB         1.00 Hz
GB         0
PC         1.40
  
```

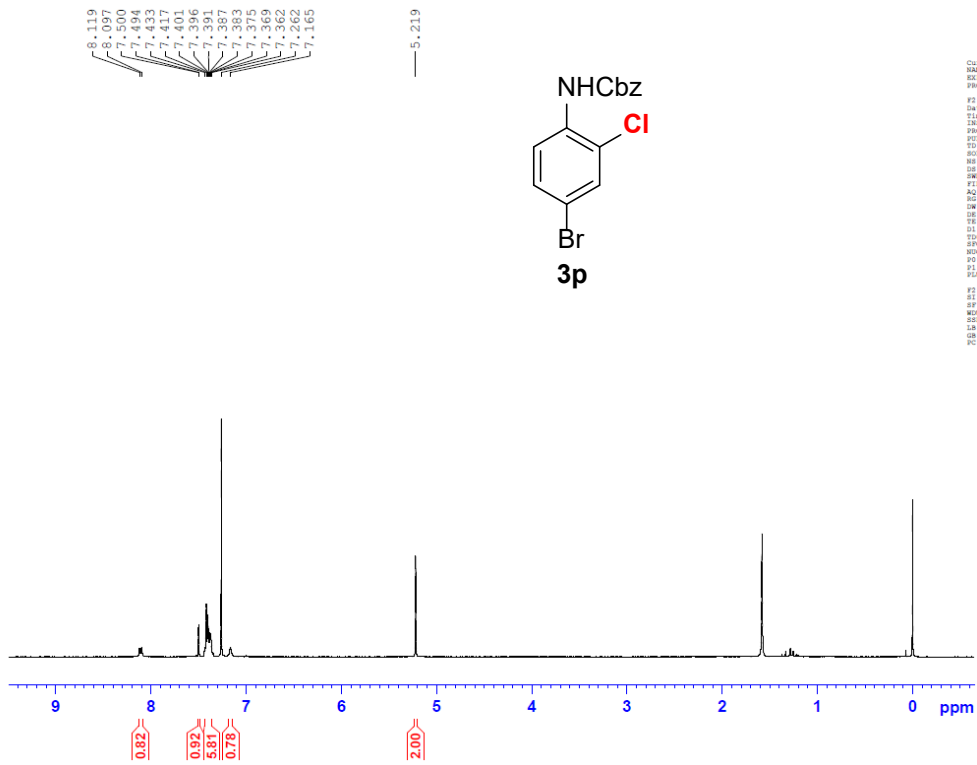

```

Current Data Parameters
NAME 1105701 5
EXPNO 10
PROCNO 10
F2 - Acquisition Parameters
Date_ 20110611
Time 12.13 h
INSTRUM Avance
PROCNO 1143730_0119 1
PULPROG zgpg30
TD 65536
SOLVENT CDCl3
NS 16
DS 4
SWH 8194.712 Hz
FIDRES 0.252144 Hz
AQ 1.9378222 sec
RG 101
DM 61.000 usec
DE 13.94 usec
TE 300.2 K
D1 1.00000000 sec
D2 0.00000000 sec
TDO 400.272413 MHz
SFO1 400.272413 MHz
NUC1 13
PC 1.10 usec
PI 7.54 usec
PWL1 24.0000000 W
F2 - Processing parameters
SI 400.270000 MHz
SF 400.270000 MHz
WDW EM
SSB 0
LB 0.30 Hz
GB 0
PC 1.00
  
```

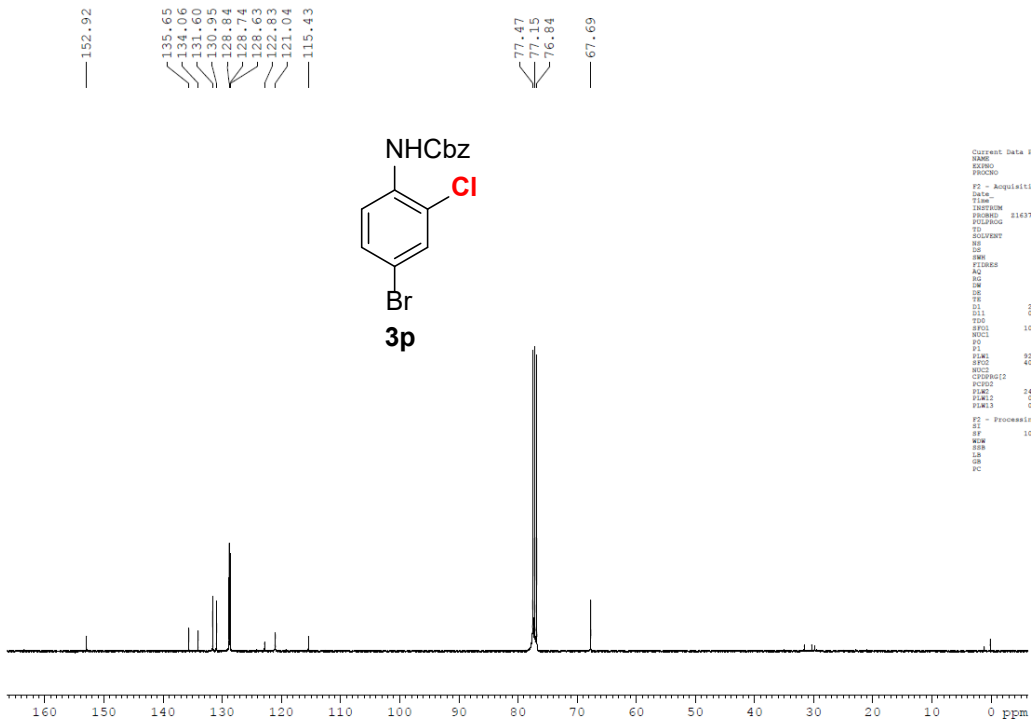

```

Current Data Parameters
NAME 1105701 5
EXPNO 10
PROCNO 10
F2 - Acquisition Parameters
Date_ 20110611
Time 12.43 h
INSTRUM Avance
PROCNO 1143730_0119 1
PULPROG zgpg30
TD 65536
SOLVENT CDCl3
NS 1672
DS 4
SWH 23869.573 Hz
FIDRES 0.7268800 Hz
AQ 1.3746180 sec
RG 101
DM 71.000 usec
DE 16.50 usec
TE 300.2 K
D1 2.00000000 sec
D2 0.00000000 sec
TDO 100.6280344 MHz
SFO1 100.6280344 MHz
NUC1 13
PC 1.40 usec
PI 10.00 usec
PWL1 92.0000000 W
SFO2 400.2716013 MHz
SFO3 100.6280344 MHz
PCPGM02 waltz16
PCPGM03 24.0000000 W
PCPGM04 0.1888000 W
PCPGM05 0.0847200 W
F2 - Processing parameters
SI 100.627800 MHz
SF 100.627800 MHz
WDW EM
SSB 0
LB 1.00 Hz
GB 0
PC 1.40
  
```

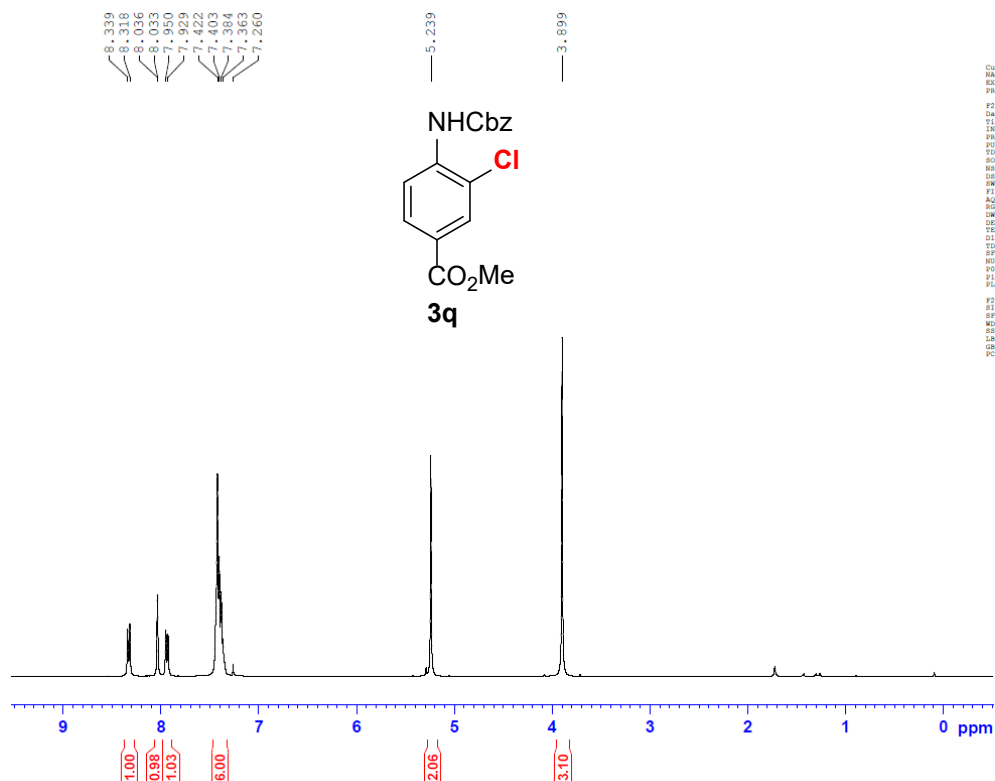

```

Current Data Parameters
NAME      1133-1
EXPNO    10
PROCNO   1

F2 - Acquisition Parameters
Date_    2021028
Time     11:35 h
INSTRUM  Avance
PROBHD   1H3139_019
PULPROG  zgpg30
TD       65536
SOLVENT  CDCl3
NS       16
DS       4
SWH      8194.732 Hz
FIDRES   0.25144 Hz
AQ       7.977054 sec
RG        39.400
DE       61.000 usec
TE       300.2 K
D1       1.0000000 sec
TSD      400.2724115 MHz
NUC1     1H
NUC2     13C
PC       24.0000000 W

F2 - Processing parameters
SI       65536
SF       400.2700000 MHz
WDW      EM
SSB      0
LB       0.30 Hz
GB       0
PC       1.00
  
```

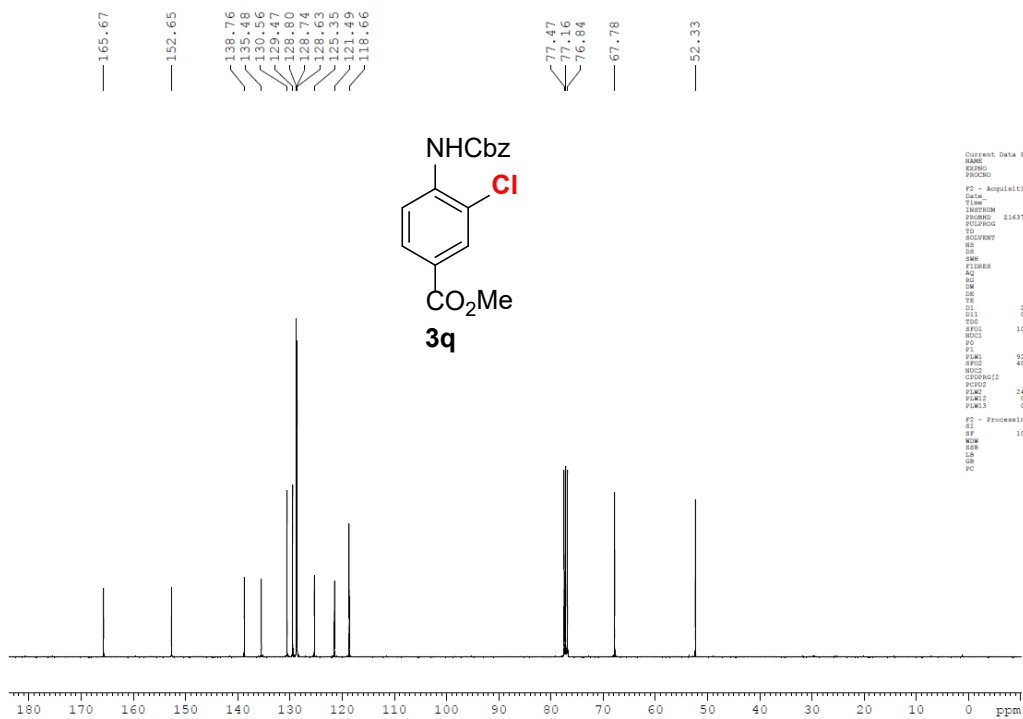

```

Current Data Parameters
NAME      1133-1C
EXPNO    7
PROCNO   1

F2 - Acquisition Parameters
Date_    2021028
Time     11:35 h
INSTRUM  Avance
PROBHD   1H3139_019
PULPROG  zgpg30
TD       65536
SOLVENT  CDCl3
NS       16
DS       4
SWH      23899.523 Hz
FIDRES   0.726603 Hz
AQ       1.3742360 sec
RG        101
DE       31.000 usec
TE       300.2 K
D1       2.0000000 sec
D11      0.0300000 sec
TSD      100.626361 MHz
NUC1     13C
NUC2     1H
PC       24.0000000 W

F2 - Processing parameters
SI       65536
SF       100.627464 MHz
WDW      EM
SSB      0
LB       1.00 Hz
GB       0
PC       1.40
  
```

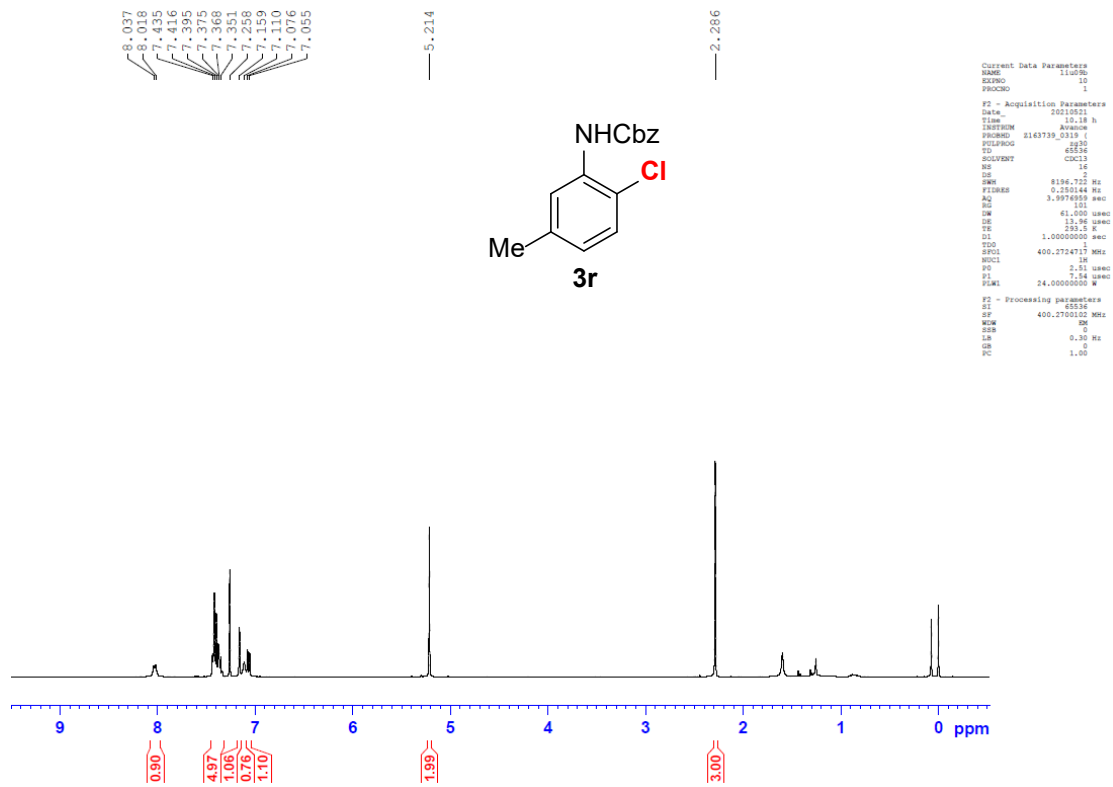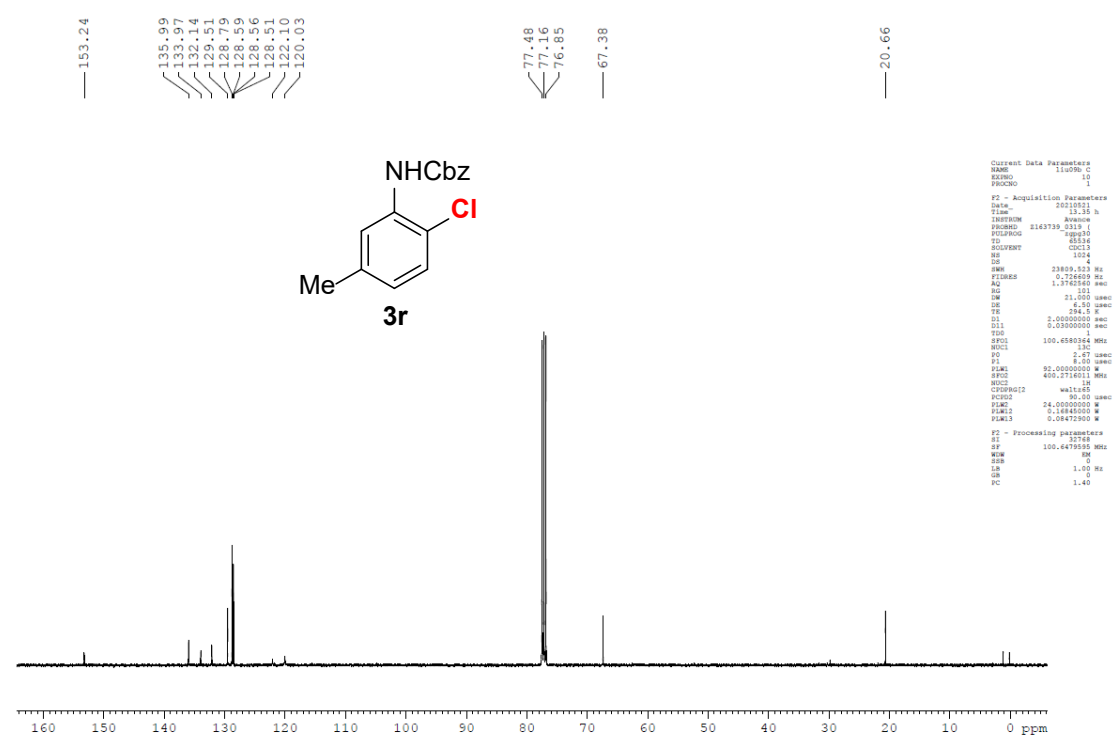

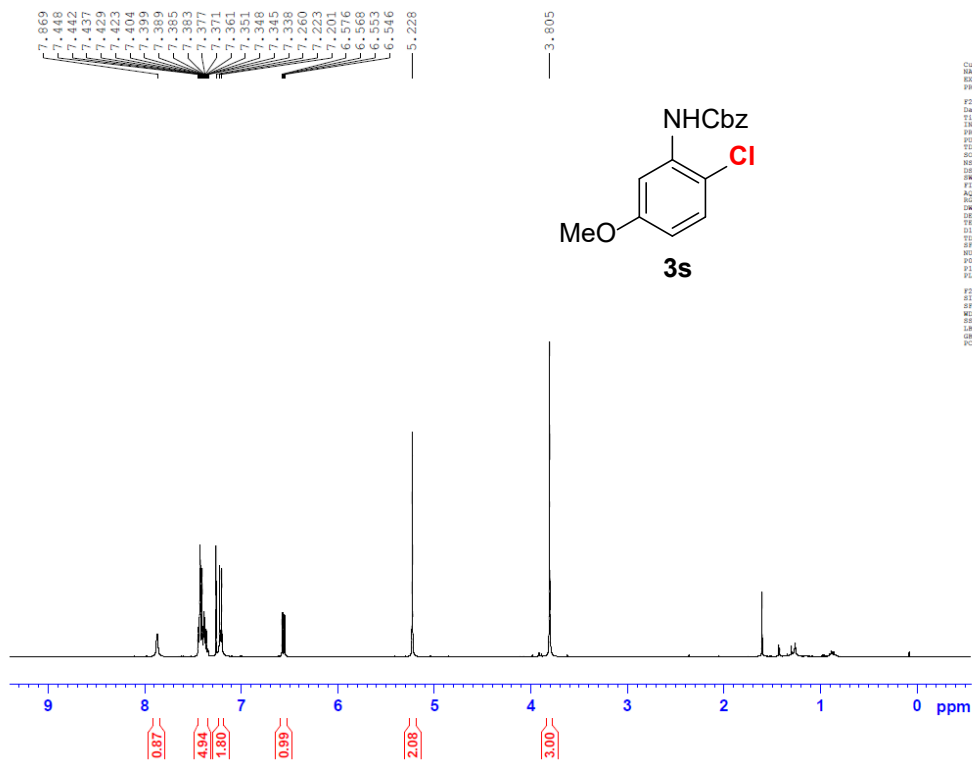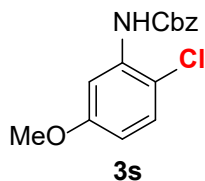

```

Current Data Parameters
NAME 11u39-7 n-mse
EXPNO 10
PROCNO 1
F2 - Acquisition Parameters
Date_ 20110211
Time 20.07 h
INSTRUM Avance
PROBHD 1H3739_0319 f
PULPROG zgpg30
TD 65536
SOLVENT CDCl3
NS 8
DS 4
SWH 8196.722 Hz
FIDRES 0.150144 Hz
AQ 3.997689 sec
RG 101
SQ 61.000 usec
DE 13.96 usec
TE 293.0 K
D1 1.0000000 sec
TSD
SFO1 400.274117 MHz
NUC1 1H
P1 2.51 usec
PI 7.14 usec
PL1 24.0000000 W
F2 - Processing parameters
SI 65536
SF 400.270074 MHz
WDW EM
SSB 0
LB 0.30 Hz
GB 0
PC 1.00
  
```

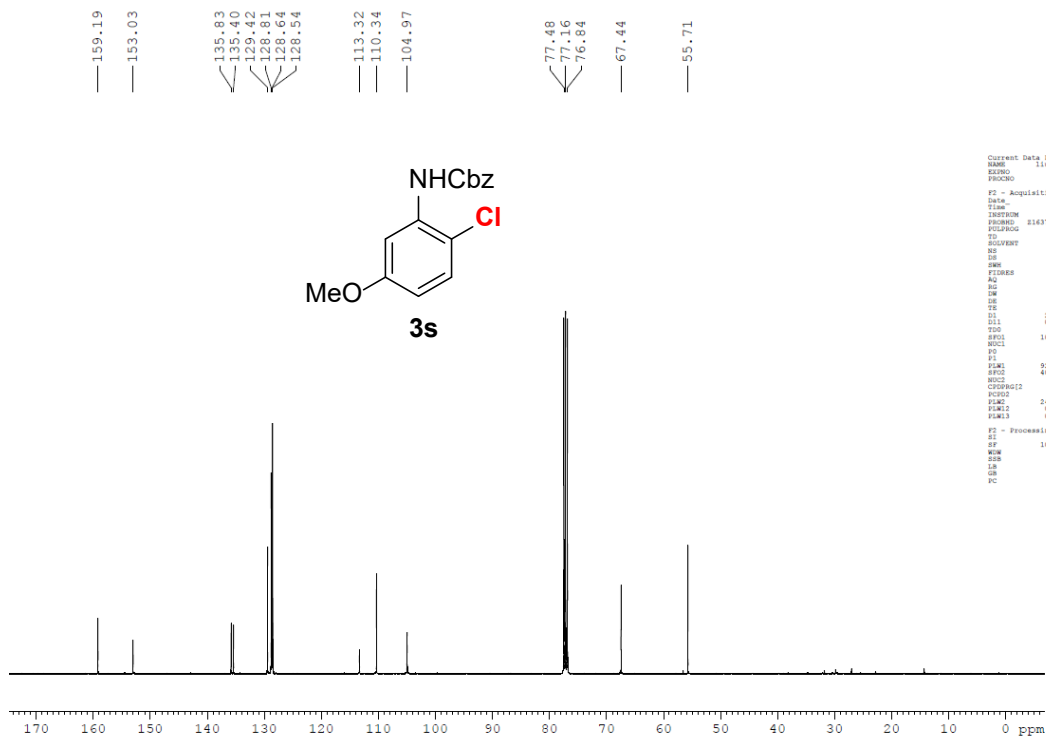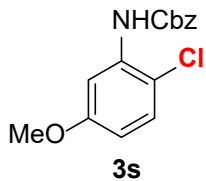

```

Current Data Parameters
NAME 11u39c n-mse
EXPNO 10
PROCNO 1
F2 - Acquisition Parameters
Date_ 20110211
Time 21.15 h
INSTRUM Avance
PROBHD 1H3739_0319 f
PULPROG zgpg30
TD 65536
SOLVENT CDCl3
NS 8
DS 4
SWH 23809.523 Hz
FIDRES 0.750000 Hz
AQ 1.370260 sec
RG 101
SQ 61.000 usec
DE 13.96 usec
TE 294.0 K
D1 1.0000000 sec
TSD
SFO1 100.626164 MHz
NUC1 13C
P1 8.00 usec
PI 1.00 usec
PL1 24.0000000 W
PL12 0.1848000 W
PL13 0.0473000 W
F2 - Processing parameters
SI 65536
SF 100.627142 MHz
WDW EM
SSB 0
LB 1.00 Hz
GB 0
PC 1.40
  
```



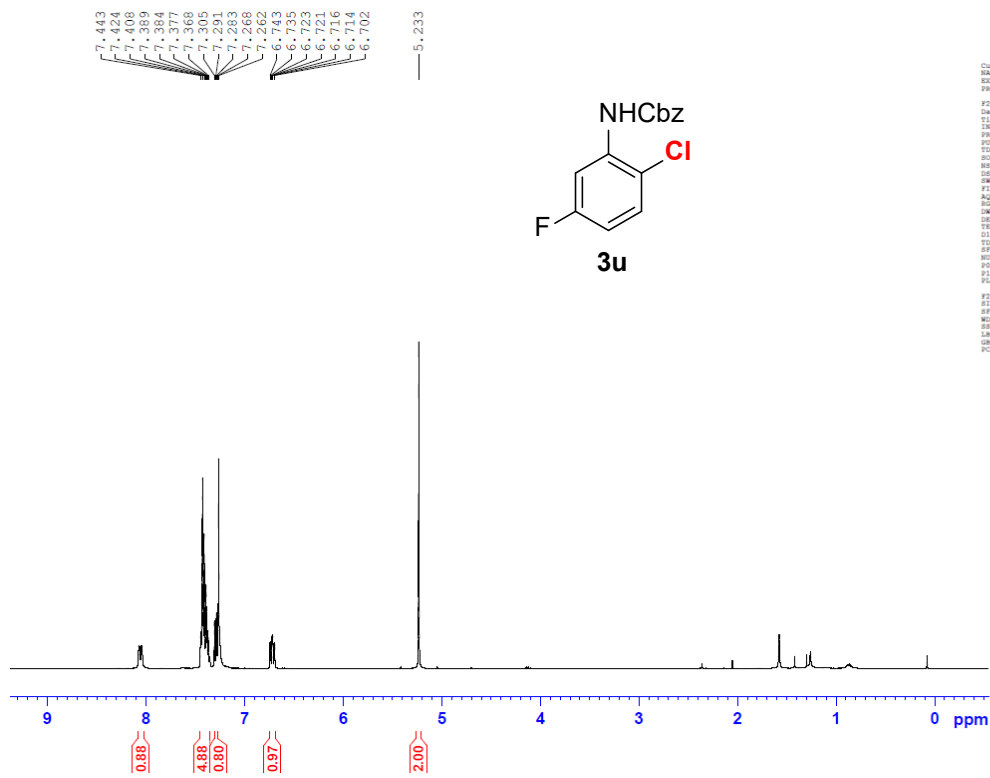

```

Current Data Parameters
NAME      11u404-4
EXPNO    10
PROCNO   1
F2 - Acquisition Parameters
Date_    20221010
Time     20.03 h
INSTRUM  Avance
PROBHD   1H313
PULPROG  zgpg30
SOLVENT  CDCl3
NS       6520
DS       4
SWH      8162.722 Hz
F2RES    0.250144 Hz
AQ       3.974600 sec
RG        101
DM       61.000 usec
DE       18.96 usec
TE       290.4 K
D1       1.00000000 sec
TSD
SFO1     400.274175 MHz
NUC1      1H
PC       2.51 usec
PL1      1.64 usec
PLW1     24.00000000 W
F2 - Processing parameters
SI        6518
SF        400.270089 MHz
RG        101
SFR       0
SRR       0
LA       0.30 Hz
GB        1.00
PC        1.00
  
```

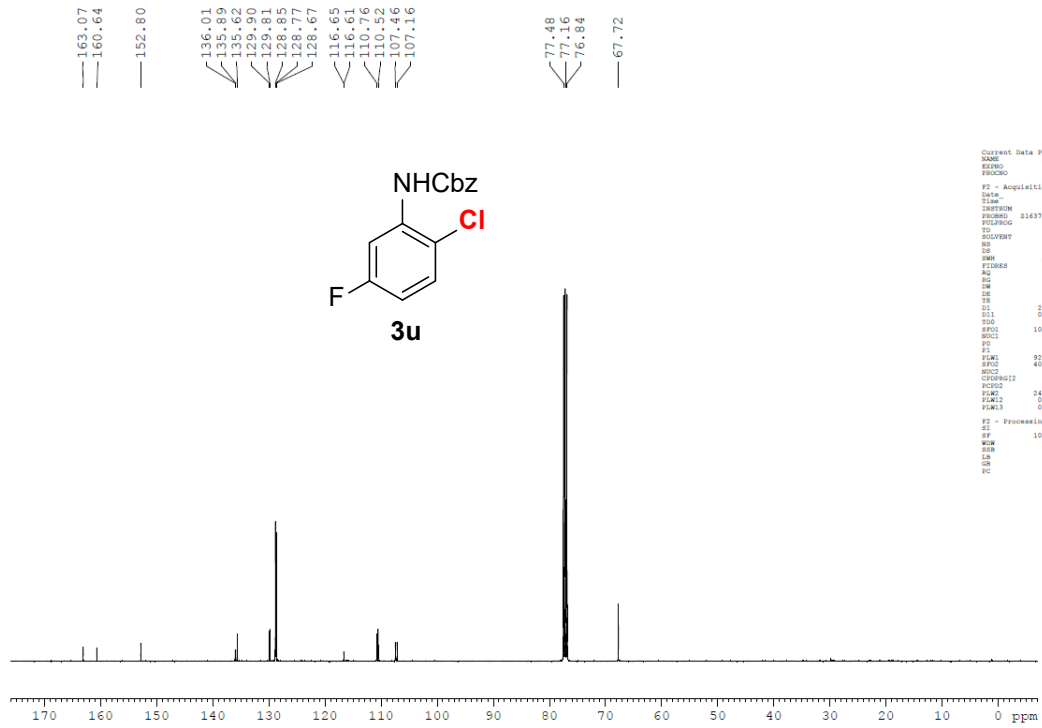

```

Current Data Parameters
NAME      11u404-4c
EXPNO    10
PROCNO   1
F2 - Acquisition Parameters
Date_    20221013
Time     20.03 h
INSTRUM  Avance
PROBHD   1H313
PULPROG  zgpg30
SOLVENT  CDCl3
NS       10240
DS       4
SWH      33829.533 Hz
F2RES    0.726609 Hz
AQ       1.3742160 sec
RG        101
DM       21.000 usec
DE       18.00 usec
TE       290.2 K
D1       2.00000000 sec
D11      0.33000000 sec
TSD
SFO1     100.626164 MHz
NUC1      13C
PC       1.47 usec
PL1      1.00 usec
PLW1     32.00000000 W
SFO2     400.274175 MHz
NUC2      1H
PCW2     90.00 usec
PLW2     24.00000000 W
PLW12    0.16845000 W
PLW13    0.08472500 W
F2 - Processing parameters
SI        6518
SF        100.627820 MHz
RG        101
SFR       1.00 Hz
SRR       0
LA       1.00 Hz
GB        1.40
PC        1.40
  
```





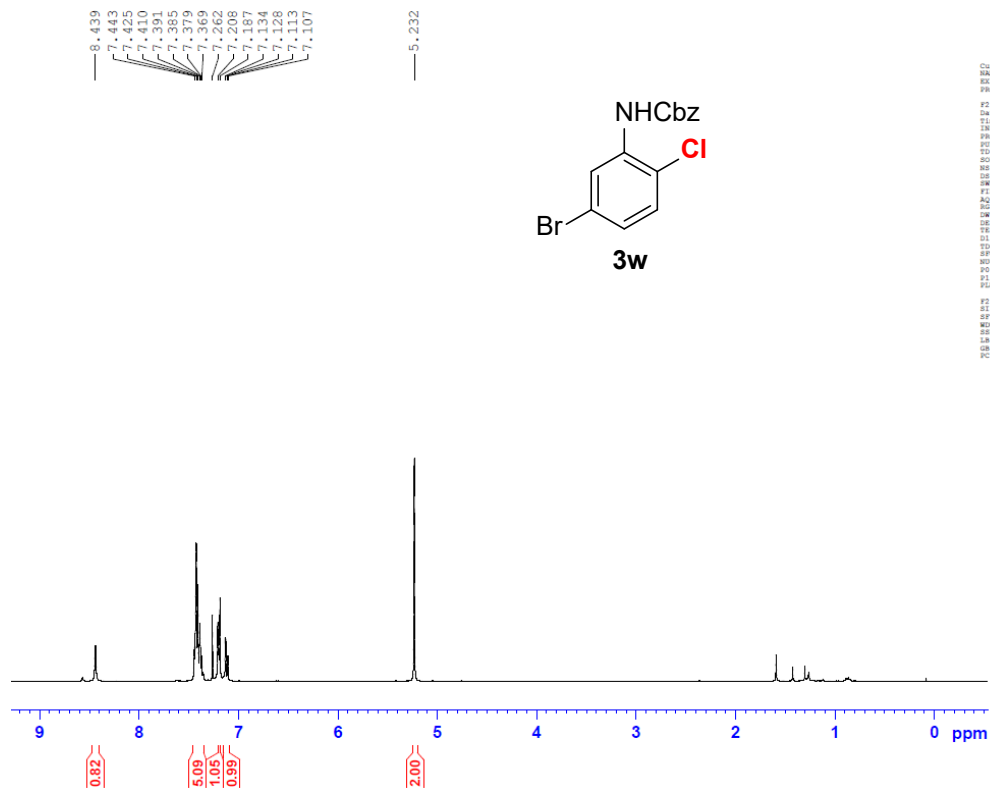

```

Current Data Parameters
NAME      110346
EXPNO    12
PROCNO   1
-----
F2 - Acquisition Parameters
Date_    2022102
Time     19.44 h
INSTRUM  Avenae
PROBHD   1H313
PULPROG  zgpg30
TD        65536
SOLVENT  CDCl3
NS        16
DS        1
SWH       8196.722 Hz
FIDRES   0.350144 Hz
AQ        3.997499 sec
RG        101
AQ        61.000 usec
DE        13.00 usec
TE        300.2 K
D1        1.0000000 sec
d11       1
SFO1     400.274117 MHz
NUC1      1H
NUC2      13C
PC        2.51 usec
PI1       9
PI2       24.0000000 W
-----
F2 - Processing parameters
SI        65536
SF        400.270087 MHz
WDW       EM
SSB       0
LB        0.30 Hz
GB        0
CB        1.00
PC        1.00
  
```

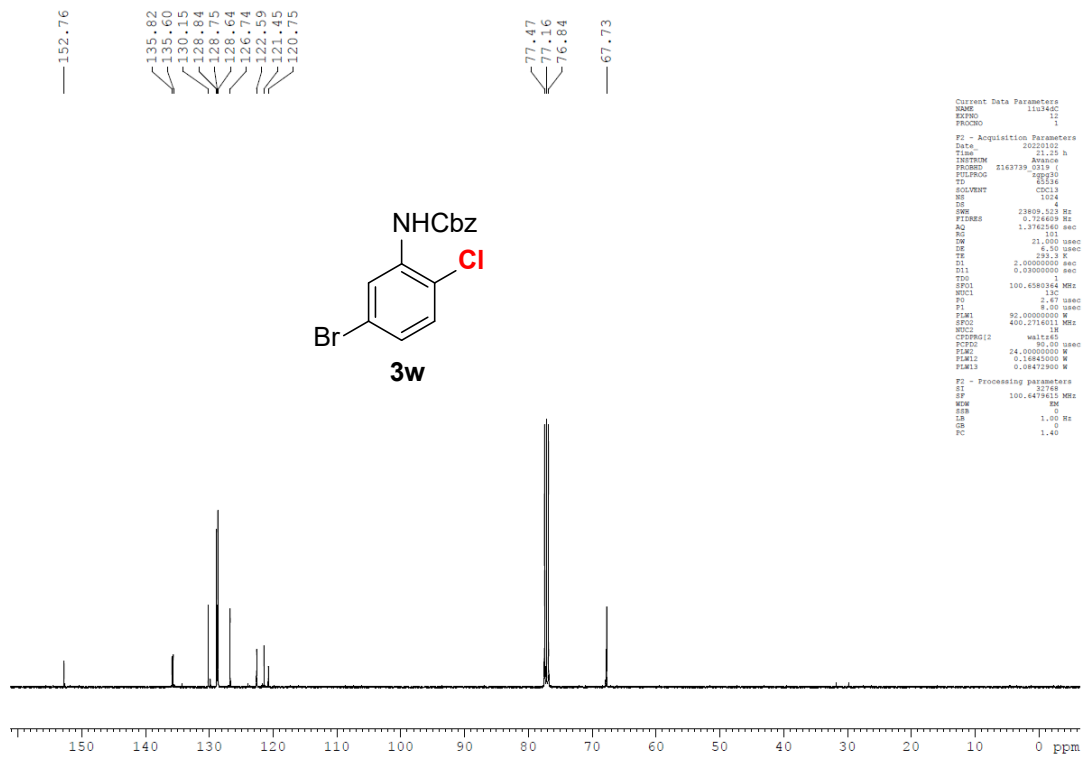

```

Current Data Parameters
NAME      110346
EXPNO    12
PROCNO   1
-----
F2 - Acquisition Parameters
Date_    2022102
Time     21.01 h
INSTRUM  Avenae
PROBHD   1H313
PULPROG  zgpg30
TD        65536
SOLVENT  CDCl3
NS        16
DS        1
SWH       23809.123 Hz
FIDRES   0.724609 Hz
AQ        1.3762160 sec
RG        101
AQ        21.000 usec
DE        6.00 usec
TE        300.2 K
D1        2.0000000 sec
d11       0.9300000 sec
SFO1     100.628124 MHz
NUC1      13C
NUC2      1H
PC        2.47 usec
PI1       8.00 usec
PI2       92.0000000 W
SFO2     400.2716011 MHz
NUC3      13C
CPDPRG2  waltz163
CTOC     90.00 usec
PIA2     24.0000000 W
PIA12    0.18481000 W
PIA13    0.08472000 W
-----
F2 - Processing parameters
SI        65536
SF        100.6279113 MHz
WDW       EM
SSB       0
LB        1.00 Hz
GB        1.00
CB        1.40
PC        1.40
  
```

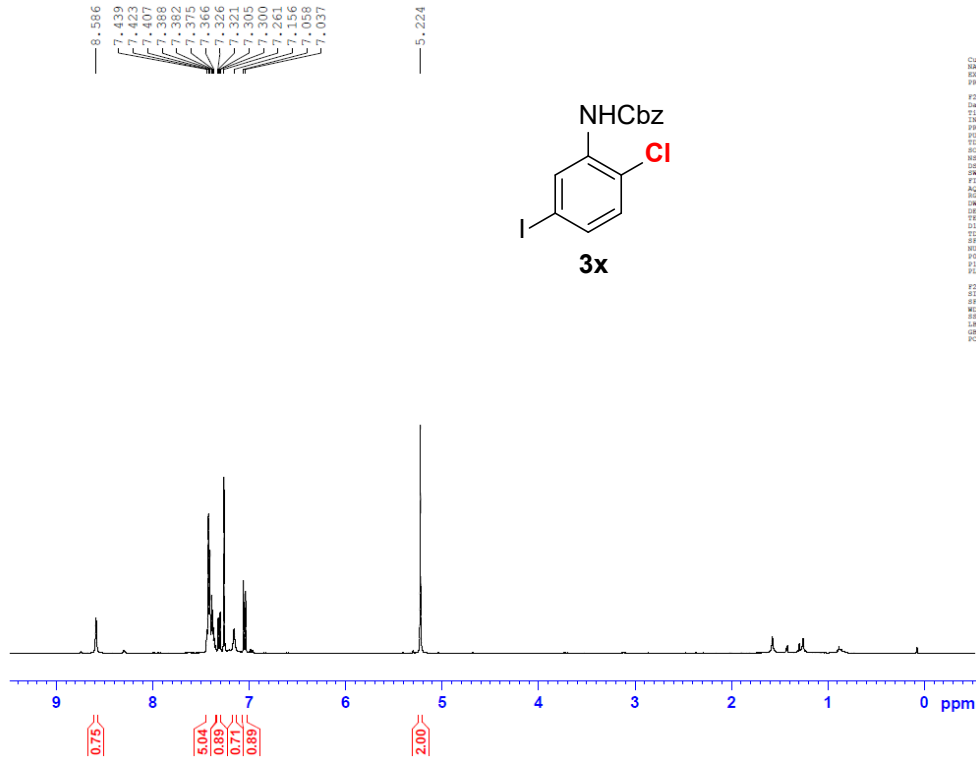

```

Current Data Parameters
NAME      115186b
EXPNO    1
PROCNO   1
F2 - Acquisition Parameters
Date_    2011227
Time     14.52
INSTRUM  Avance
PROBHD   513739_019 1
PULPROG  zgpg30
TD       65536
SOLVENT  CDCl3
NS       16
DS       4
SWH      8196.732 Hz
FIDRES   0.255144 Hz
AQ       3.974555 sec
RG       101
IN       61.000 usec
DE       19.48 usec
TE       301.3 K
D1       1.0000000 sec
TDO      61.18
SFO1     400.271411 MHz
NUC1      13
PC       2.47 usec
PL1      92.0000000 W
PL2      400.271411 MHz
PLM1     24.0000000 W

F2 - Processing parameters
SI       65536
SF       400.271411 MHz
WDW      EM
SSB      0
LB       0.30 Hz
GB       0
PC       1.00
  
```

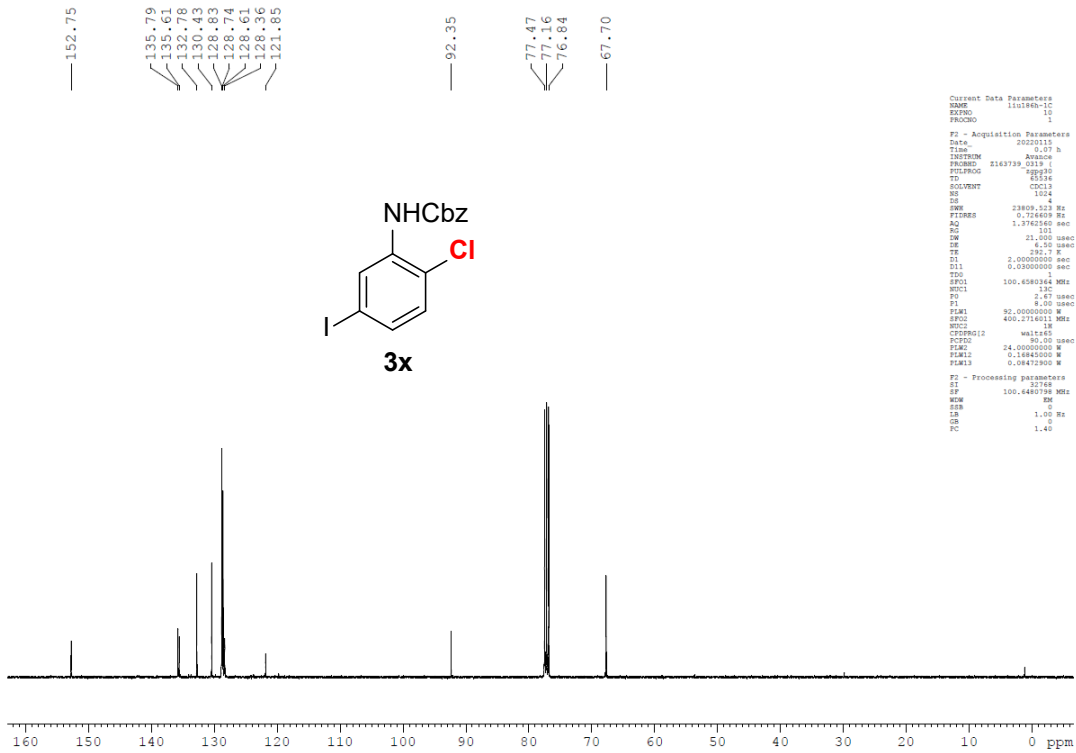

```

Current Data Parameters
NAME      115186b-10
EXPNO    1
PROCNO   1
F2 - Acquisition Parameters
Date_    2012019
Time     0.07 h
INSTRUM  Avance
PROBHD   513739_019 1
PULPROG  zgpg30
TD       65536
SOLVENT  CDCl3
NS       16
DS       4
SWH      23809.174 Hz
FIDRES   0.724409 Hz
AQ       1.374560 sec
RG       101
IN       21.101 usec
DE       19.50 usec
TE       301.3 K
D1       2.0000000 sec
TDO      0.0000000 sec
SFO1     100.626164 MHz
NUC1      13
PC       2.47 usec
PL1      92.0000000 W
PL2      400.271411 MHz
PLM1     24.0000000 W
PLM2     90.00 usec
PLM3     0.1888000 W
PLM12    0.1888000 W
PLM13    0.08472900 W

F2 - Processing parameters
SI       65536
SF       100.626164 MHz
WDW      EM
SSB      0
LB       1.00 Hz
GB       0
PC       1.40
  
```

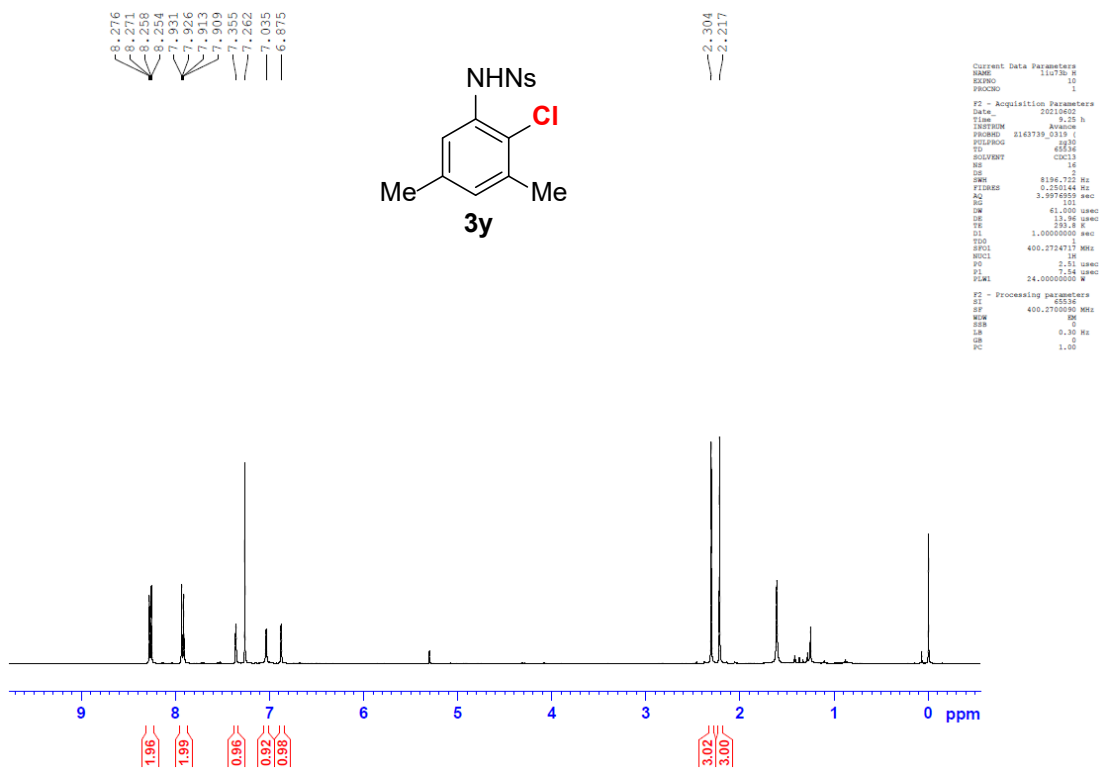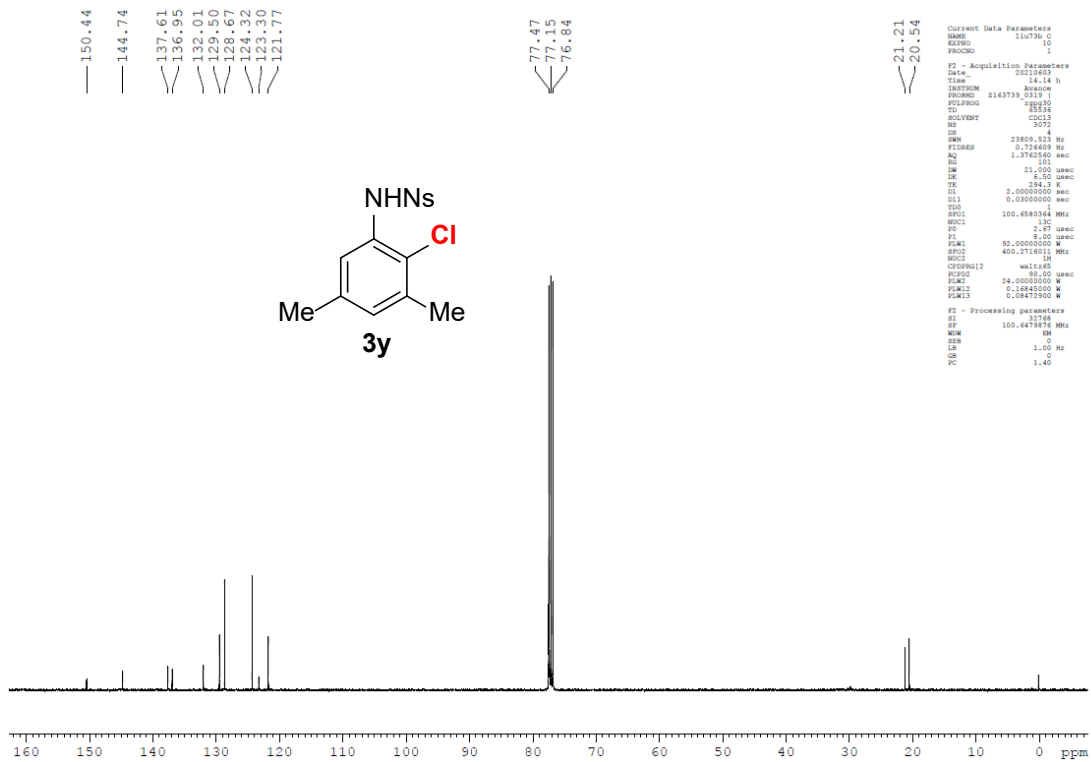

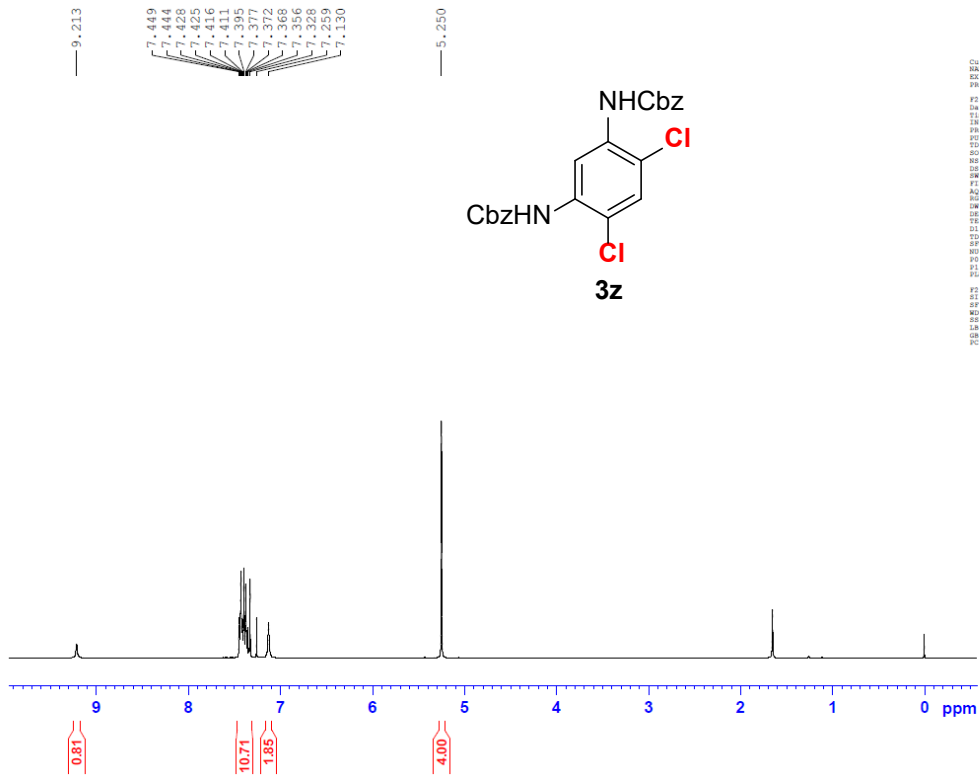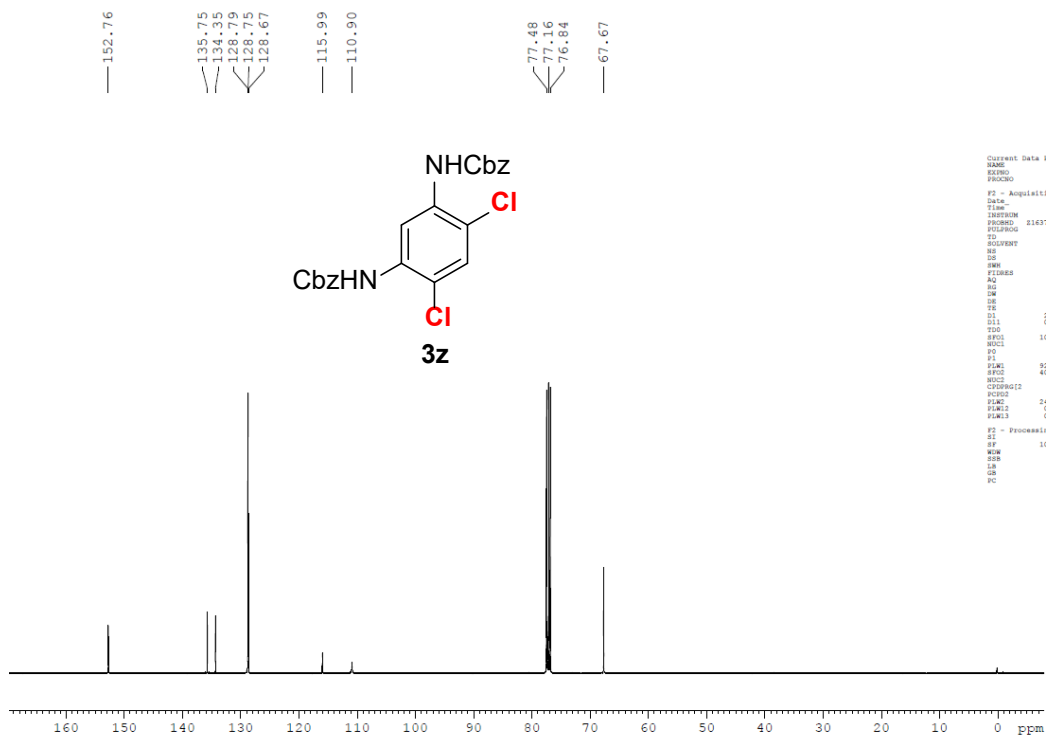

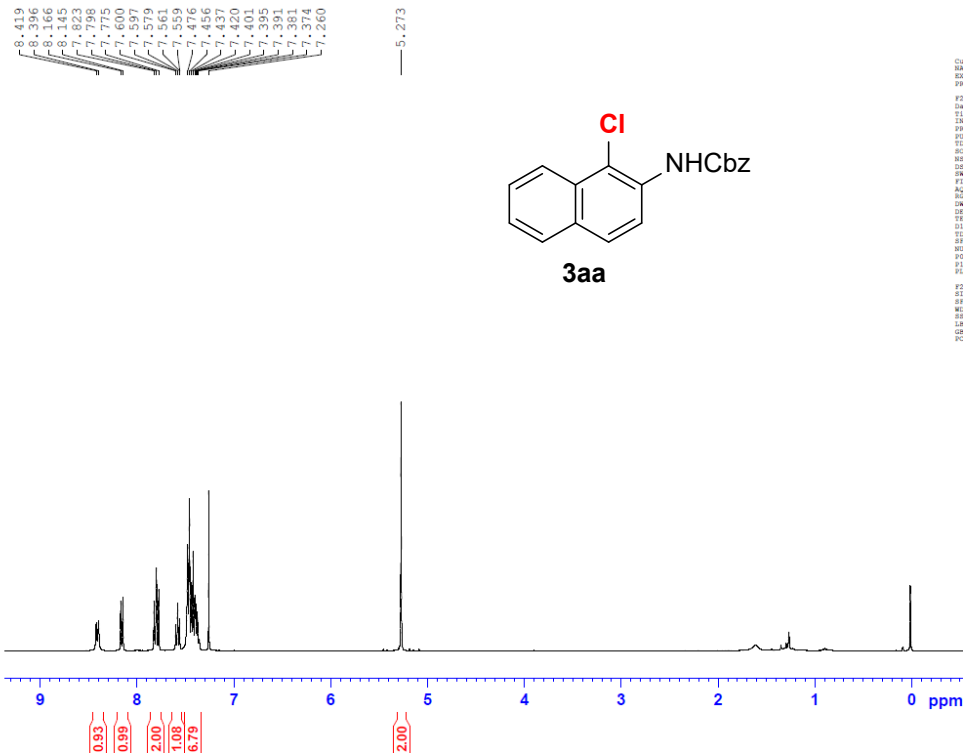

```

Current Data Parameters
NAME          1118
EXPNO         10
PROCNO        1
F2 - Acquisition Parameters
Date_         20110808
Time          4.12 h
INSTRUM       Avance
PROBHD        51339_0319 (
PULPROG       zgpg
SOLVENT       CDCl3
NS            2
DS            4
SWH           8196.722 Hz
FIDRES       0.25144 Hz
AQ           3.9974869 sec
RG           101
DM           41.000 usec
DE           13.96 usec
TE           297.0 K
D1           1.00000000 sec
TSD
SFO1         400.274717 MHz
NUC1          13
PC           2.51 usec
PL           1.54 usec
PLW1         24.0000000 W
F2 - Processing parameters
SI           65536
SF           400.2700096 MHz
WDW          EM
SSB          0
LB           0.30 Hz
GB           0
PC           1.00
  
```

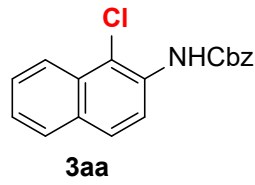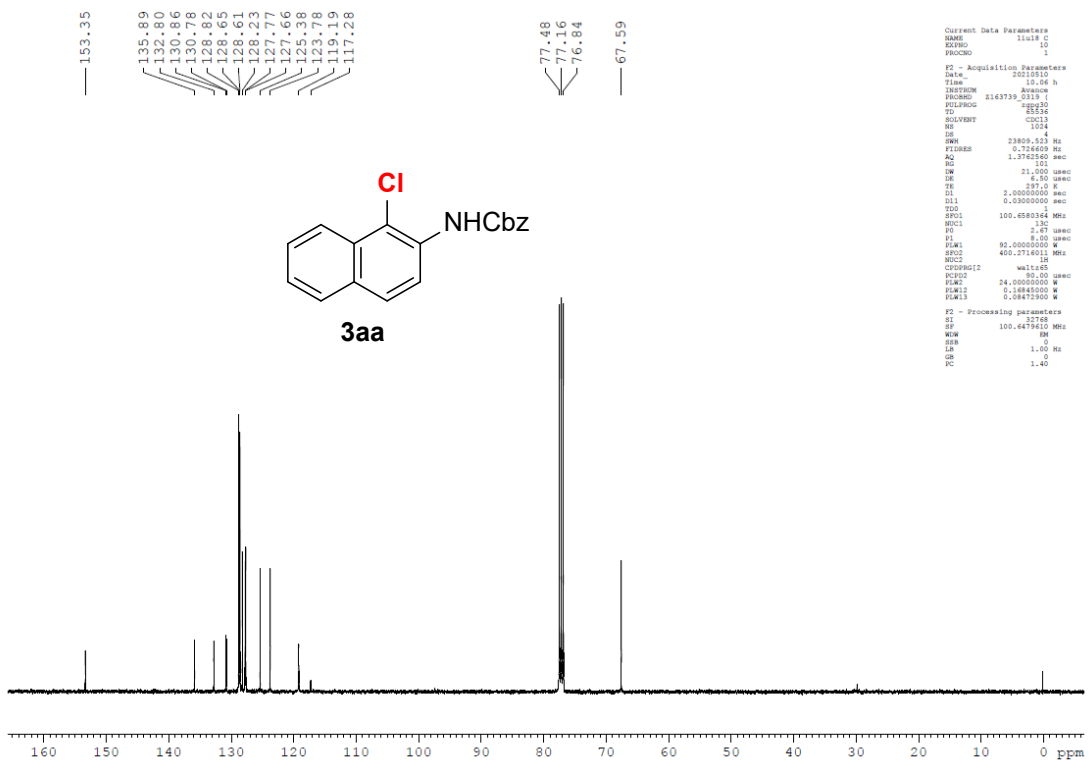

```

Current Data Parameters
NAME          1118 c
EXPNO         10
PROCNO        1
F2 - Acquisition Parameters
Date_         20110810
Time          10.04 h
INSTRUM       Avance
PROBHD        51339_0319 (
PULPROG       zgpg
SOLVENT       CDCl3
NS            2
DS            4
SWH           23809.523 Hz
FIDRES       0.714609 Hz
AQ           1.3762560 sec
RG           101
DM           21.000 usec
DE           4.50 usec
TE           297.0 K
D1           3.00000000 sec
D11          0.03000000 sec
TSD
SFO1         100.6260264 MHz
NUC1          13
PC           2.52 usec
PL           8.00 usec
PLW1         92.0000000 W
PLW2         24.0000000 W
PLW3         0.1684000 W
PLW4         0.0847000 W
CPDPRG12     waltz165
PCPD        80.00 usec
PCPD2       24.0000000 W
PCPD3       0.1684000 W
PCPD4       0.0847000 W
F2 - Processing parameters
SI           32768
SF           100.6479411 MHz
WDW          EM
SSB          0
LB           1.00 Hz
GB           0
PC           1.40
  
```

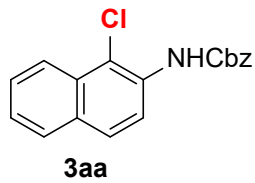

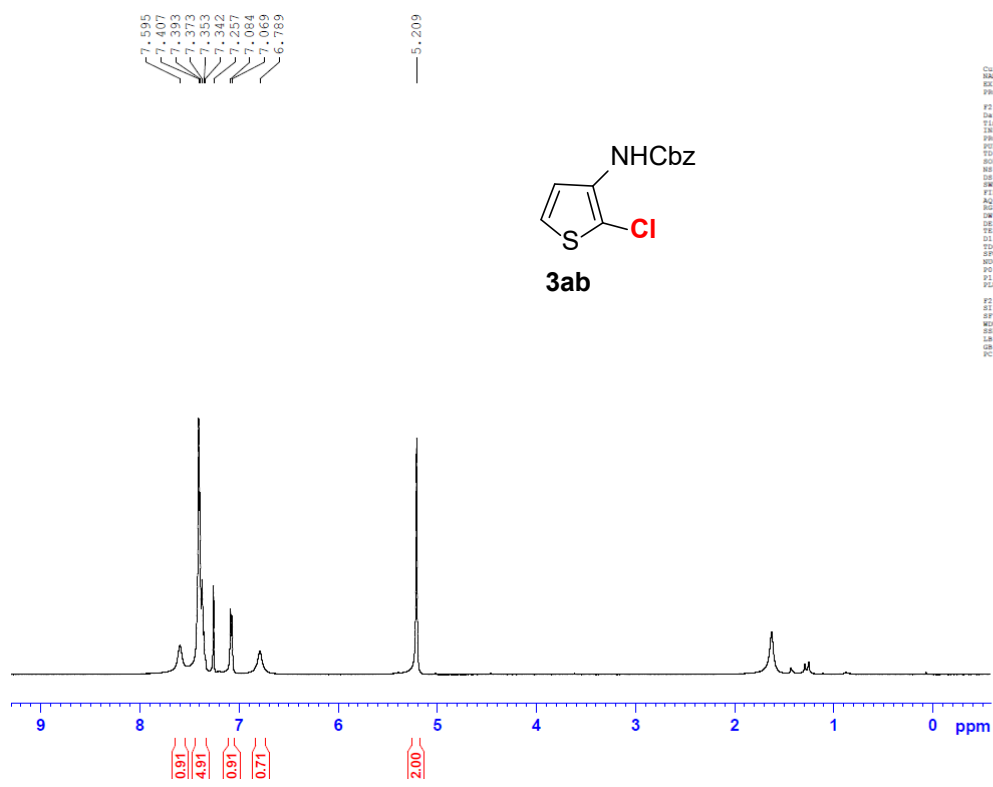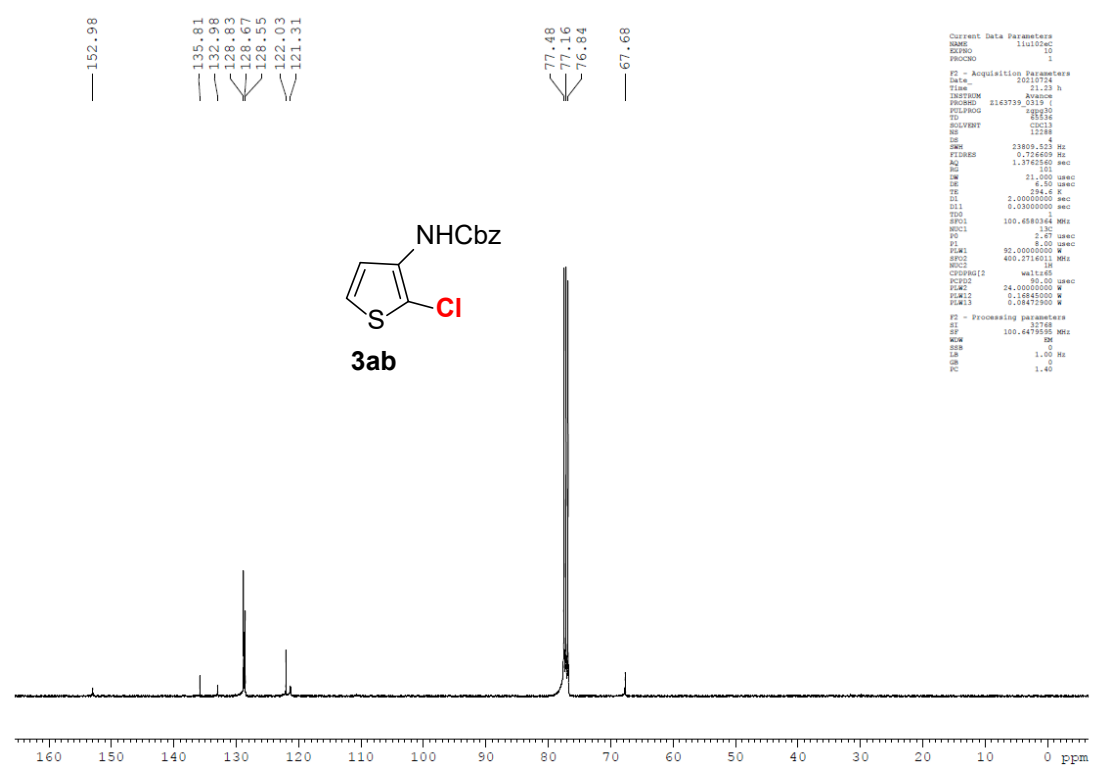

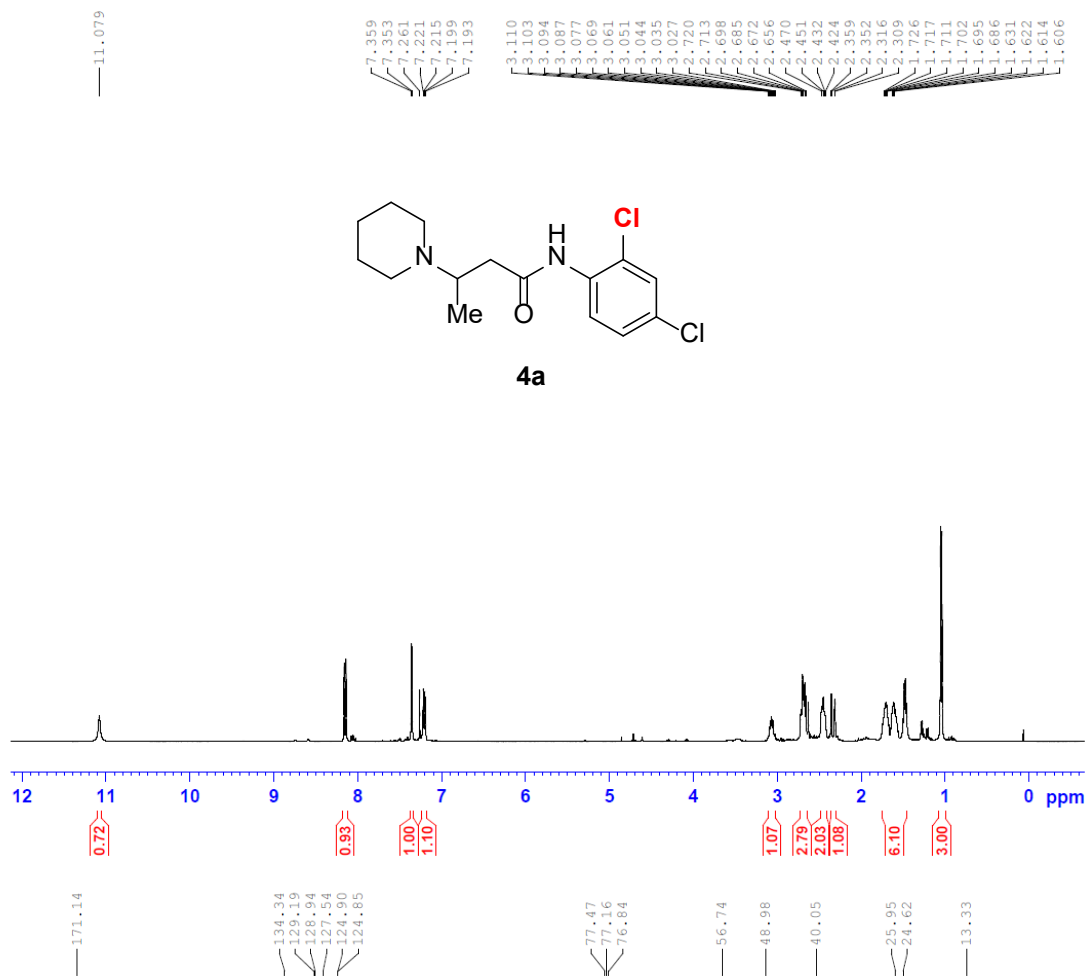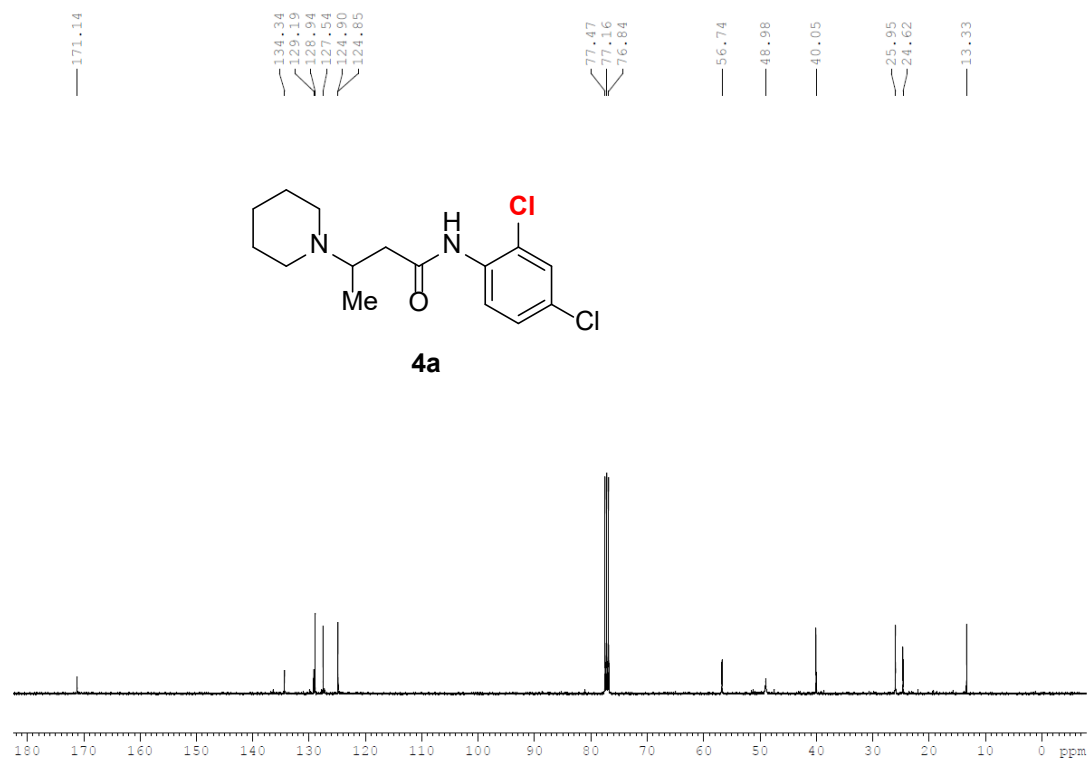



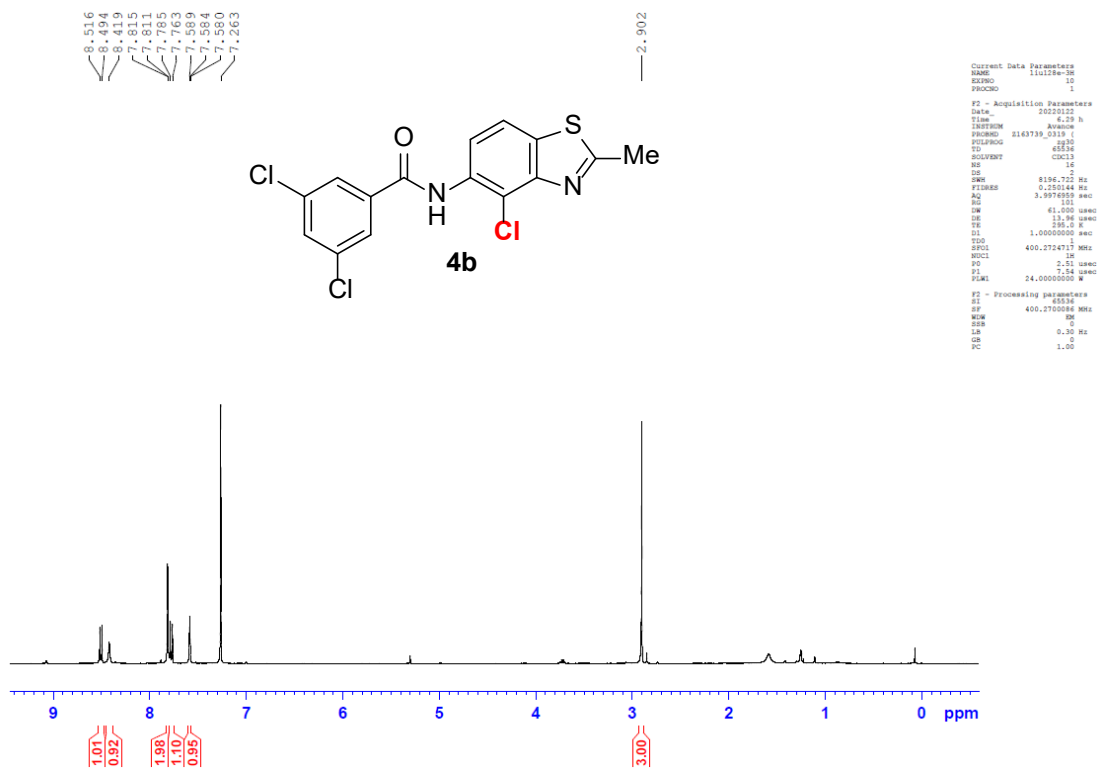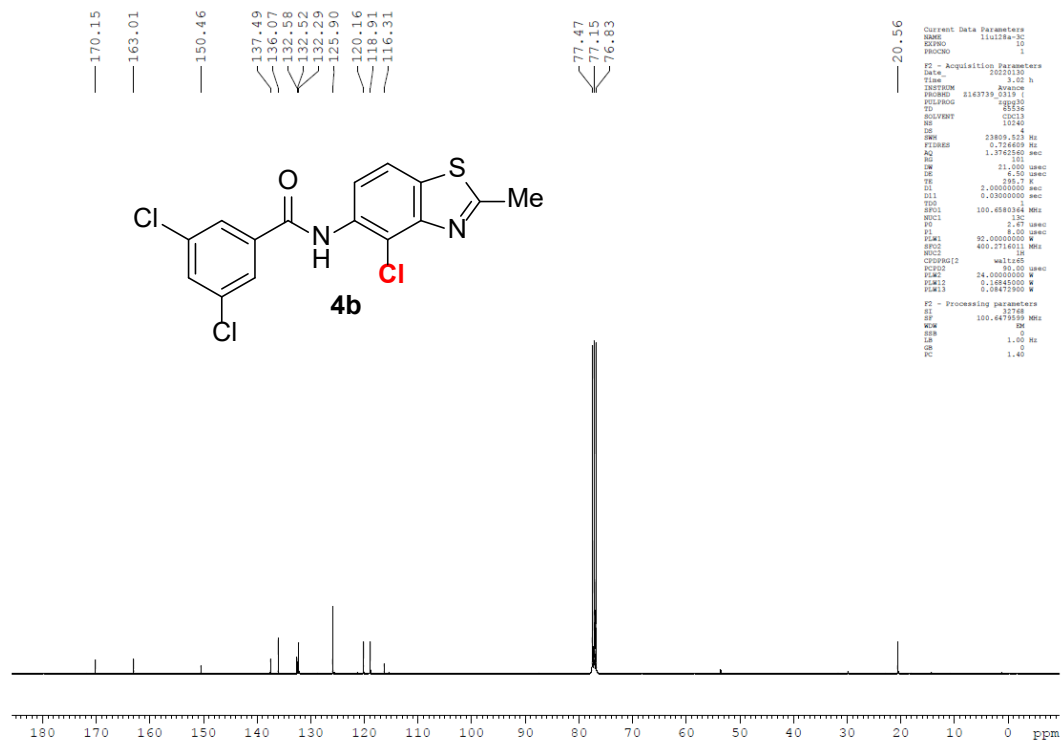

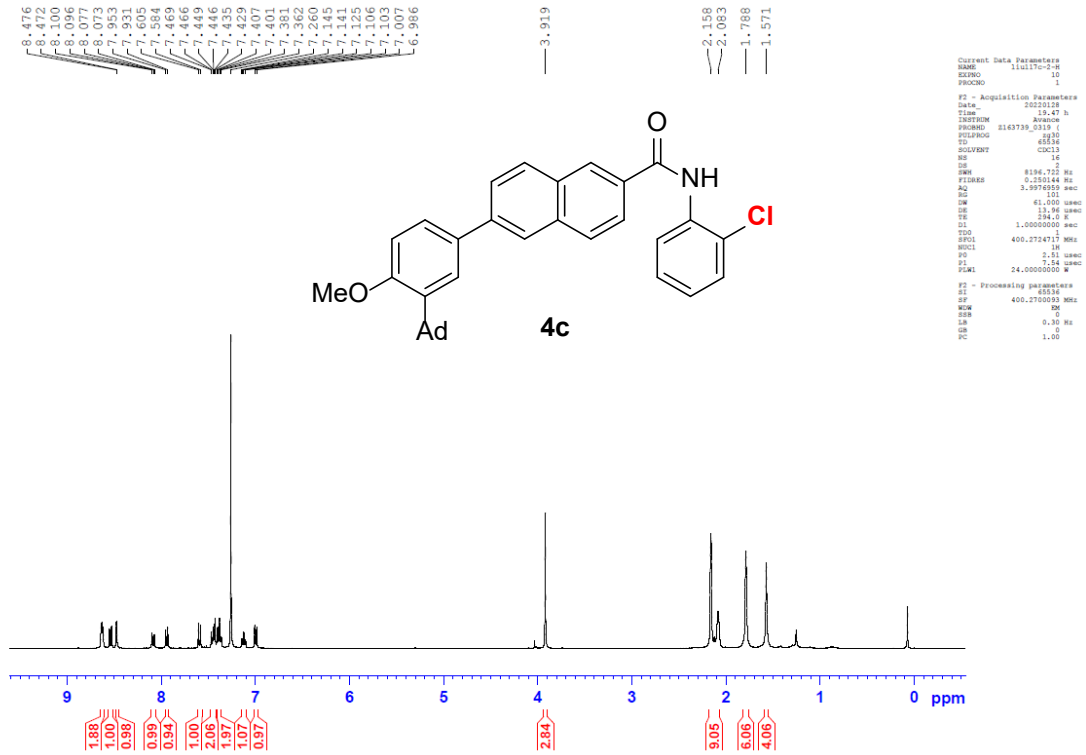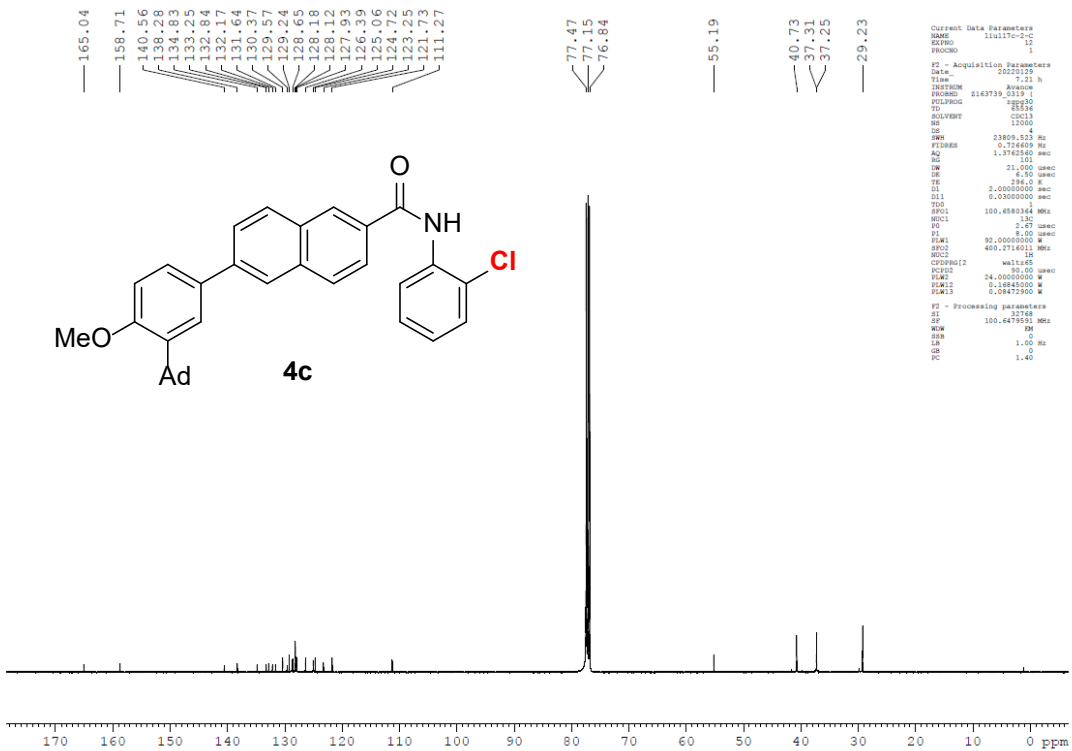

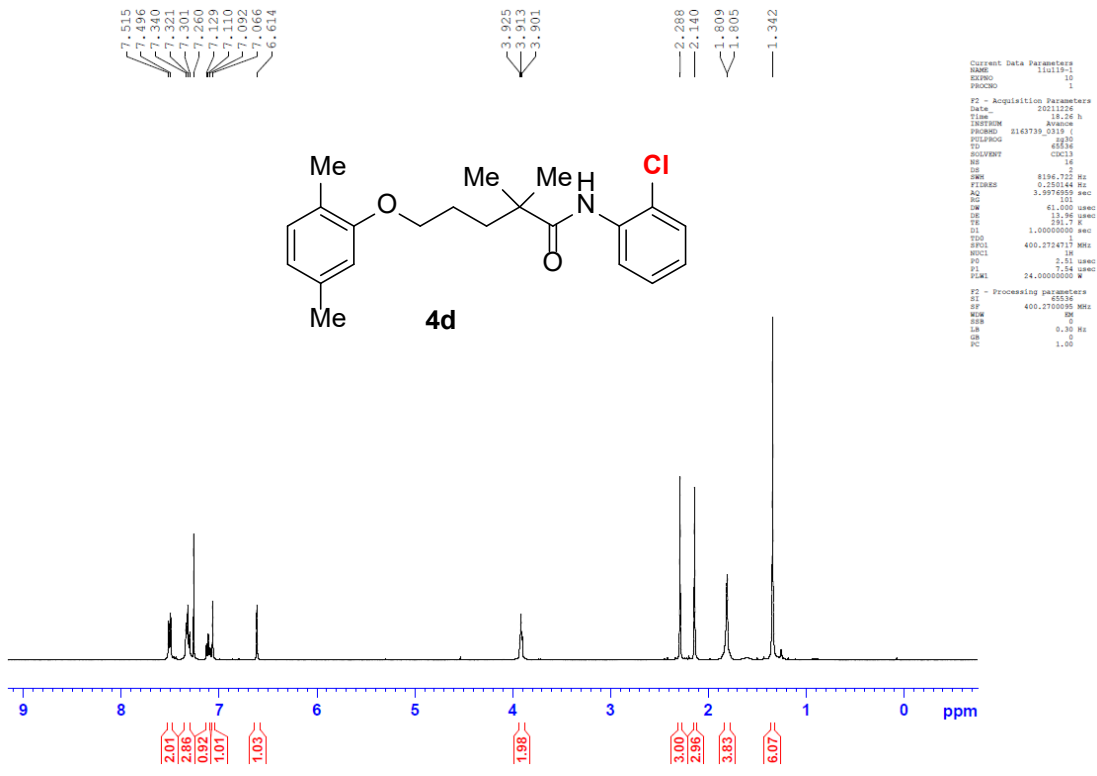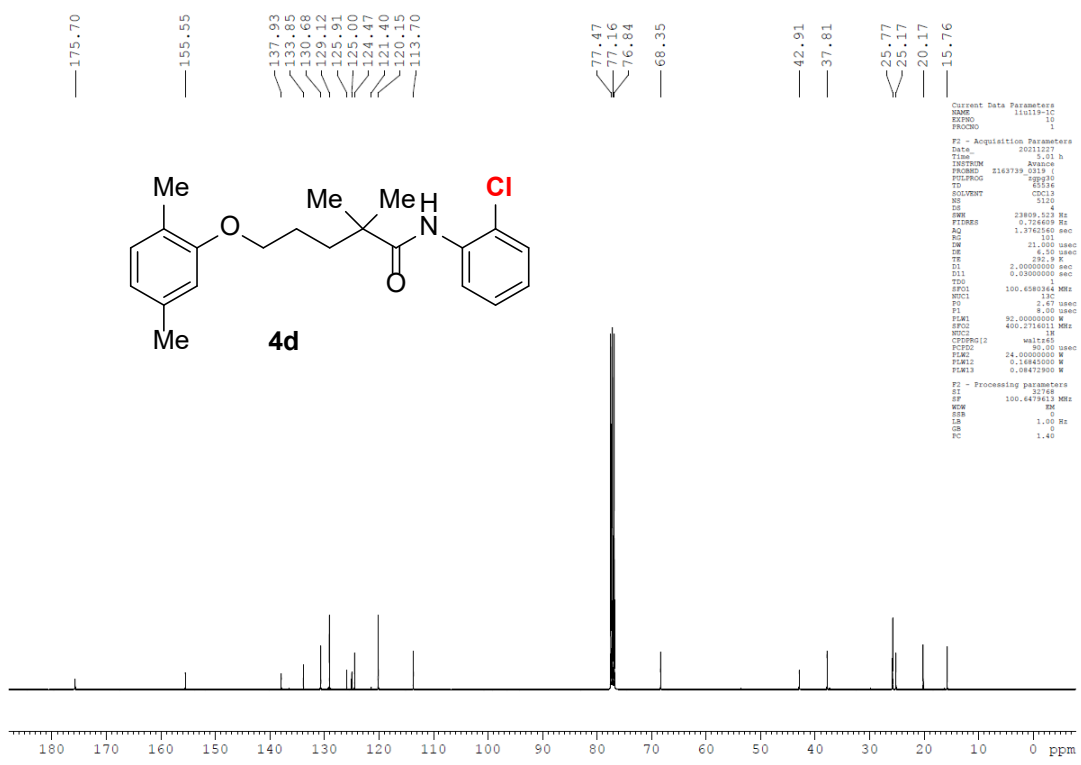

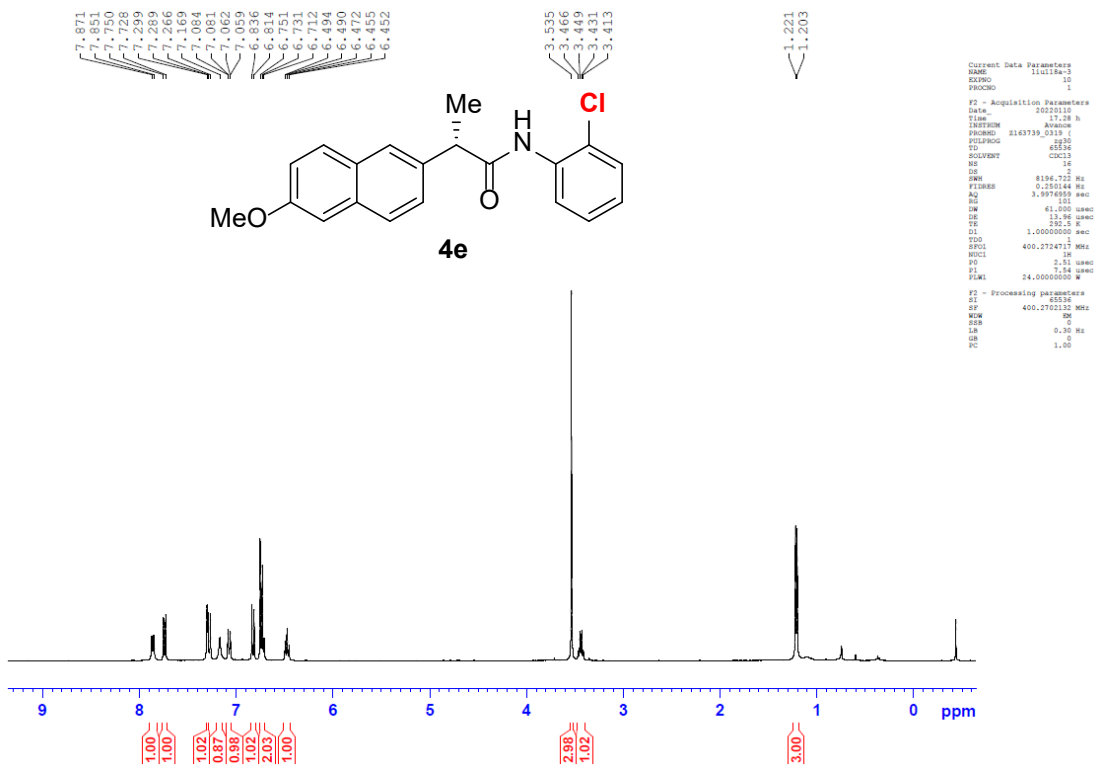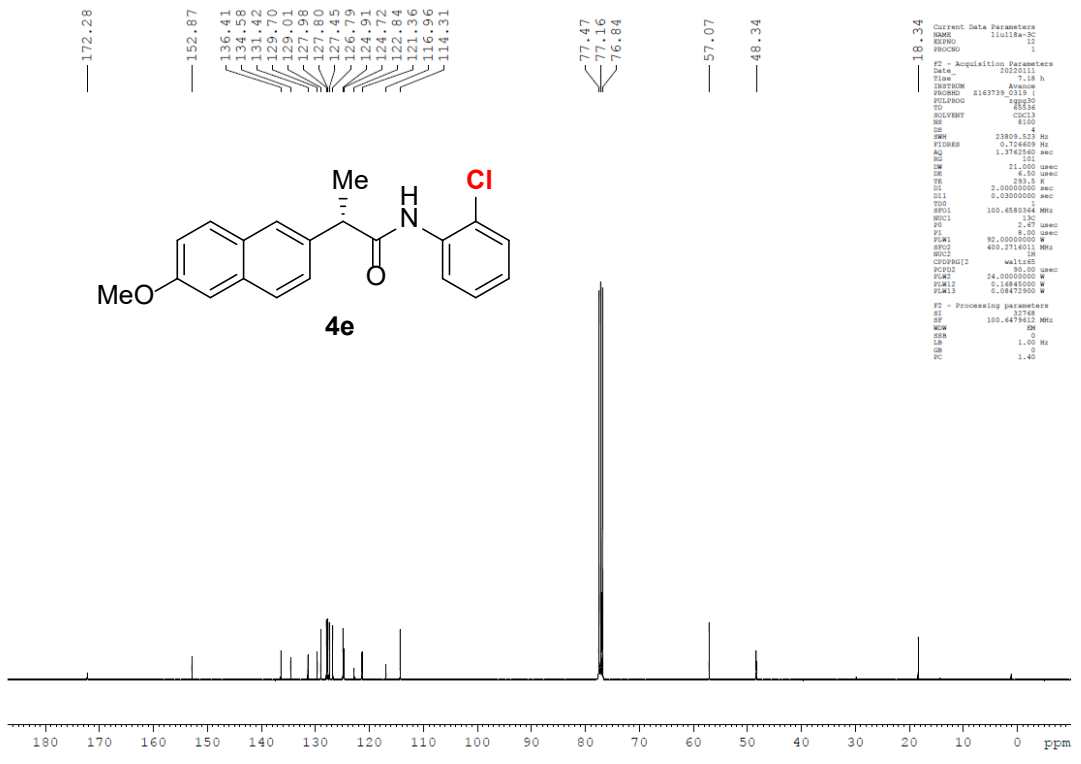

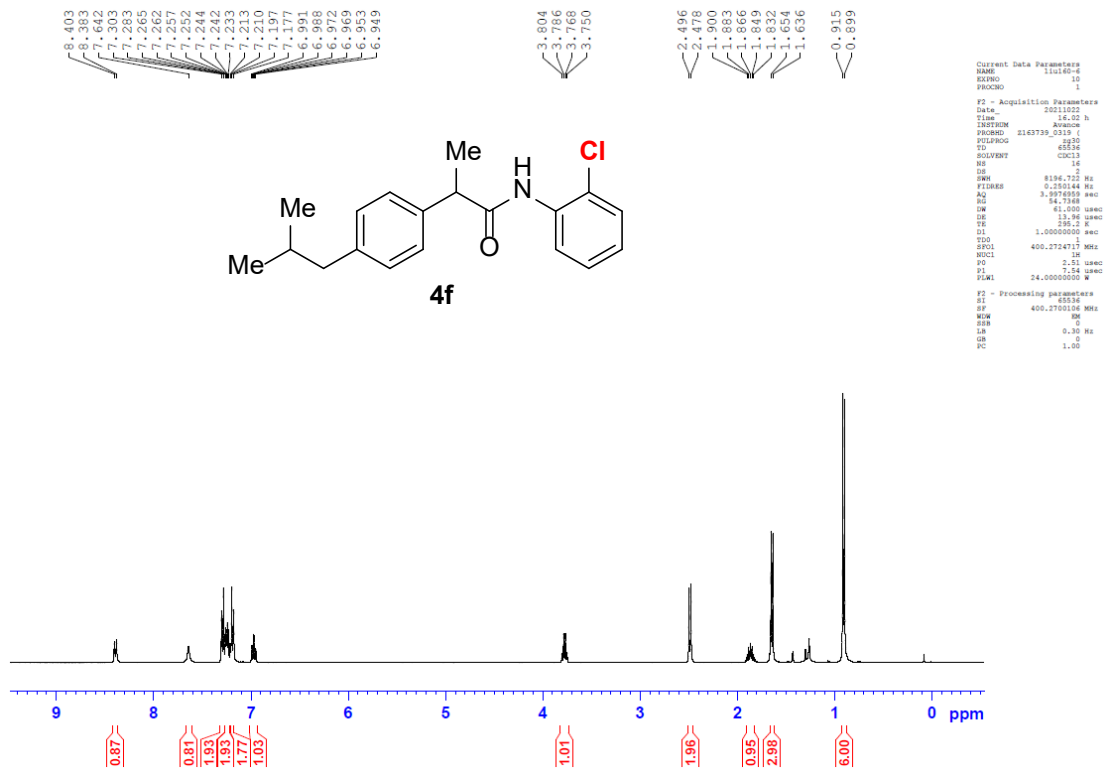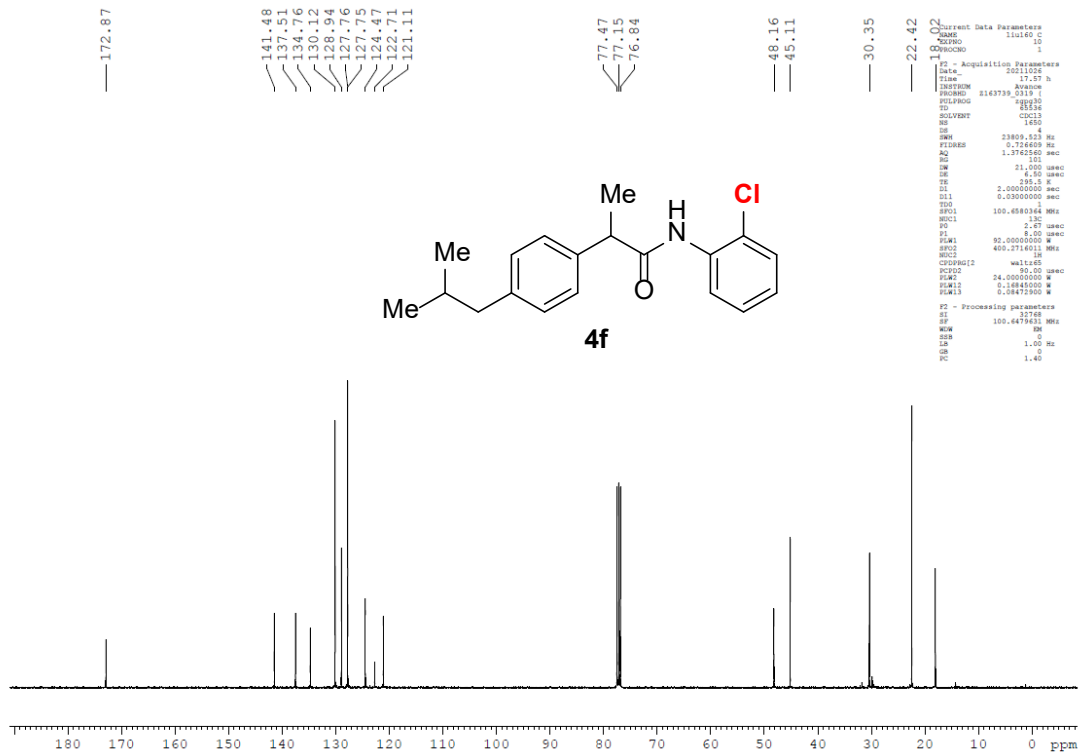

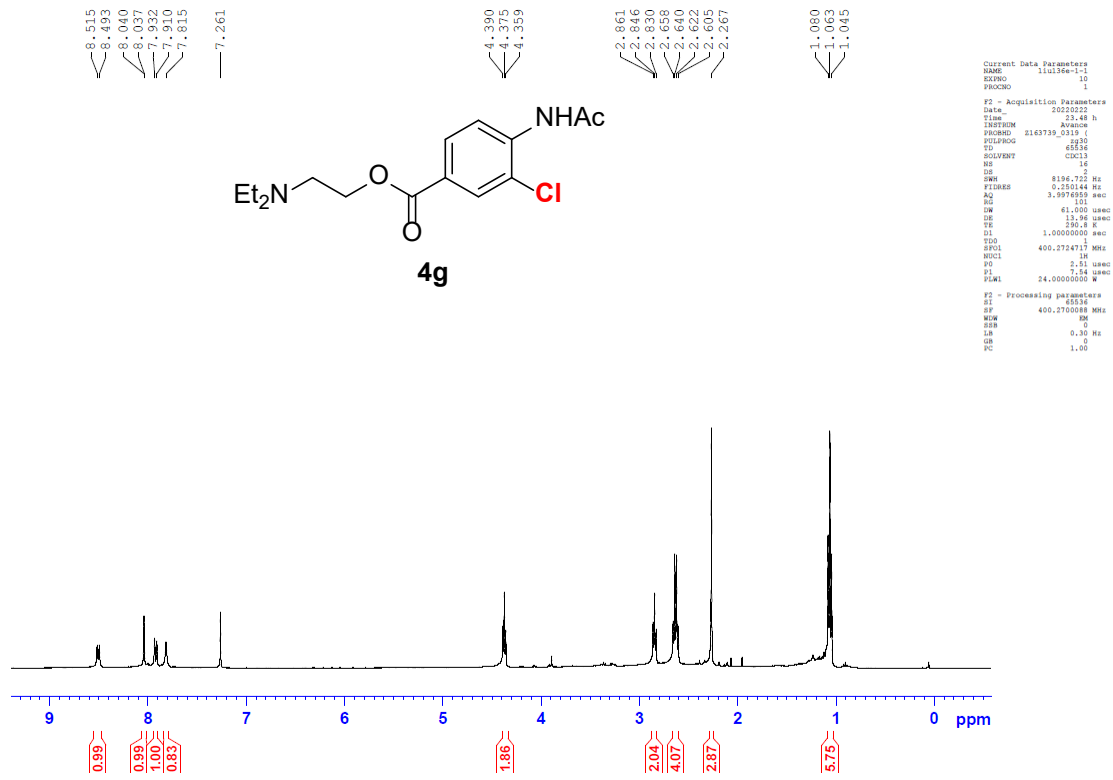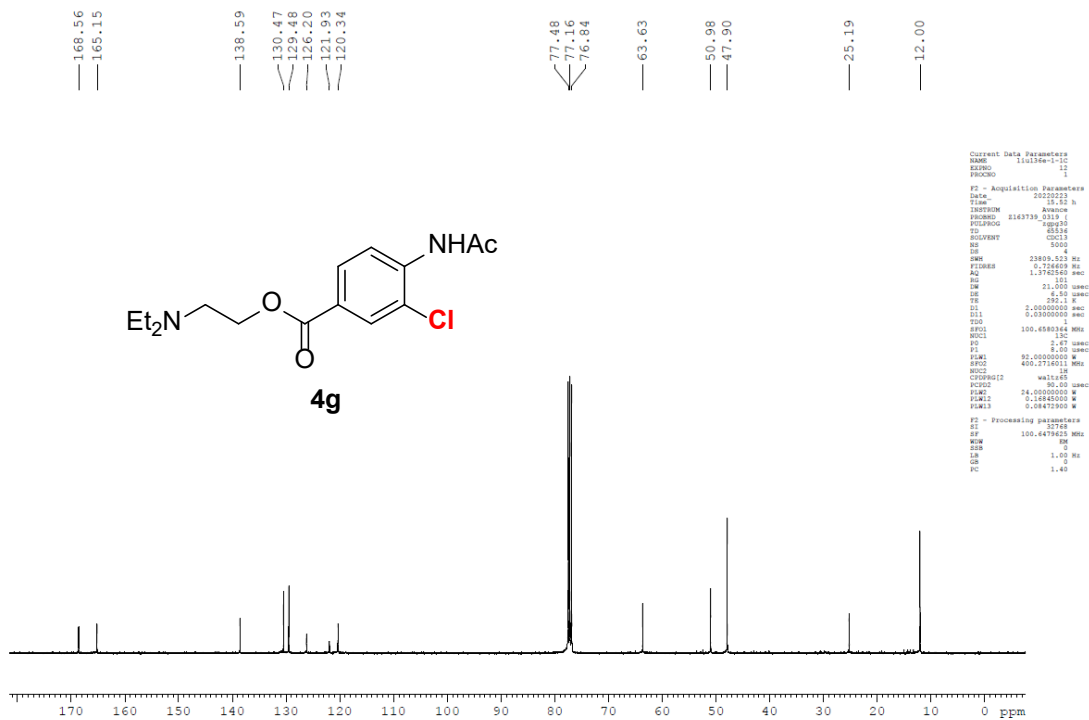

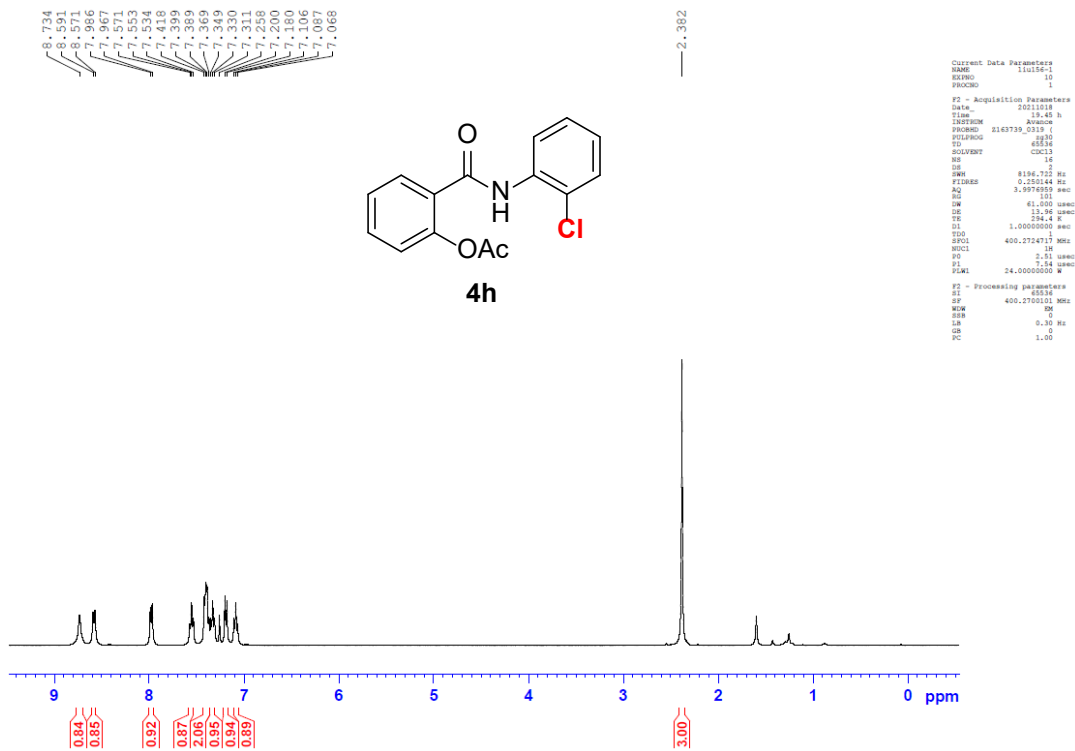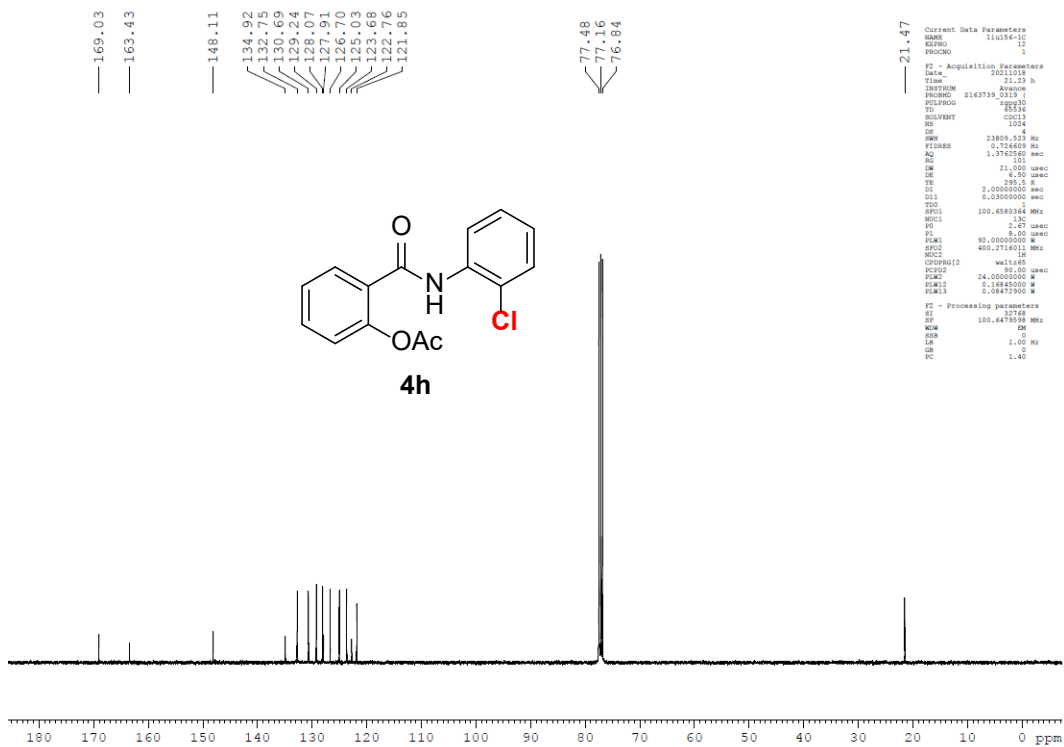

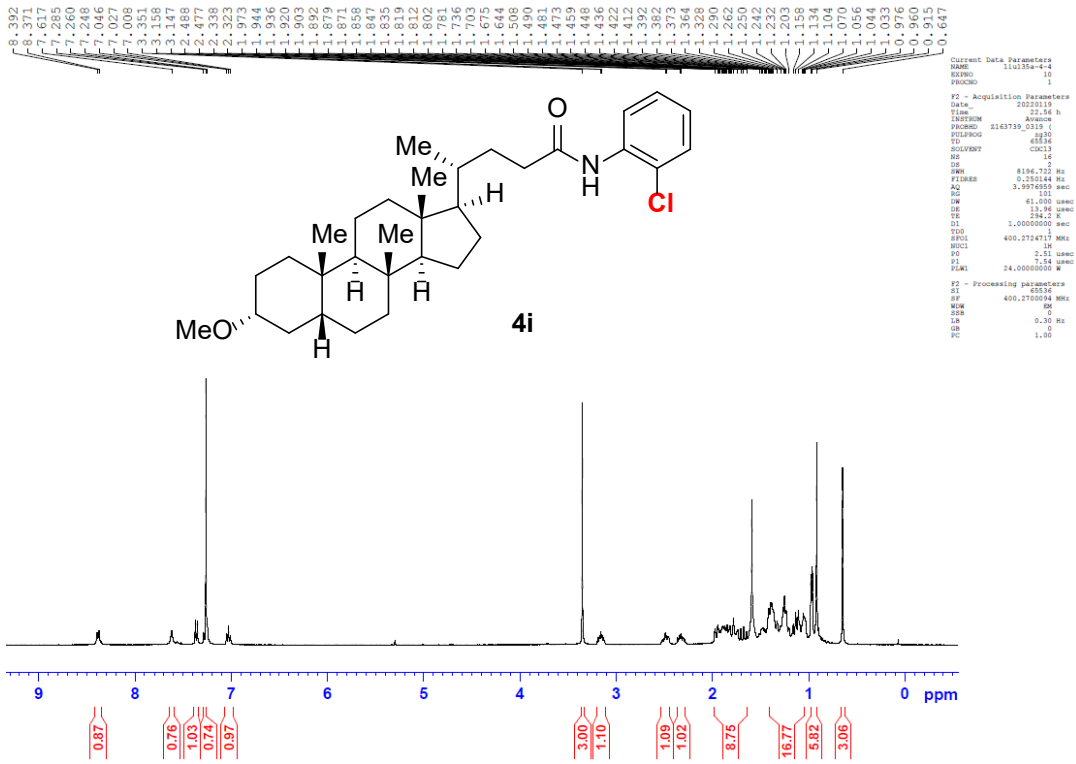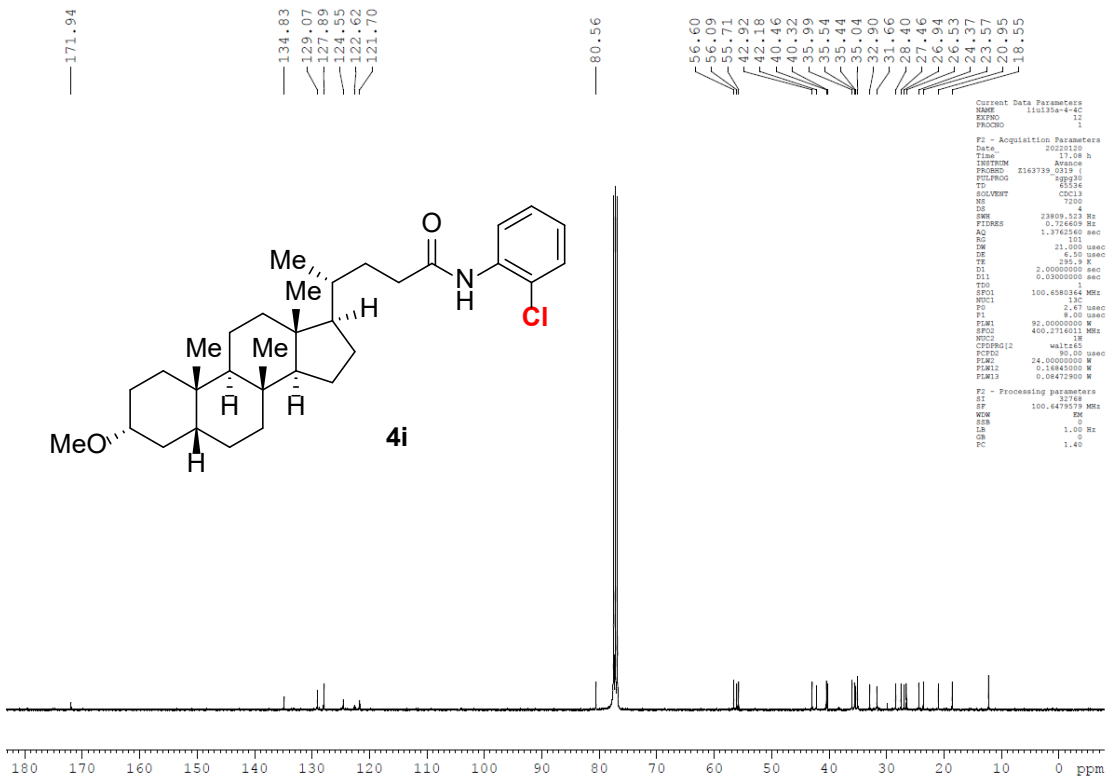



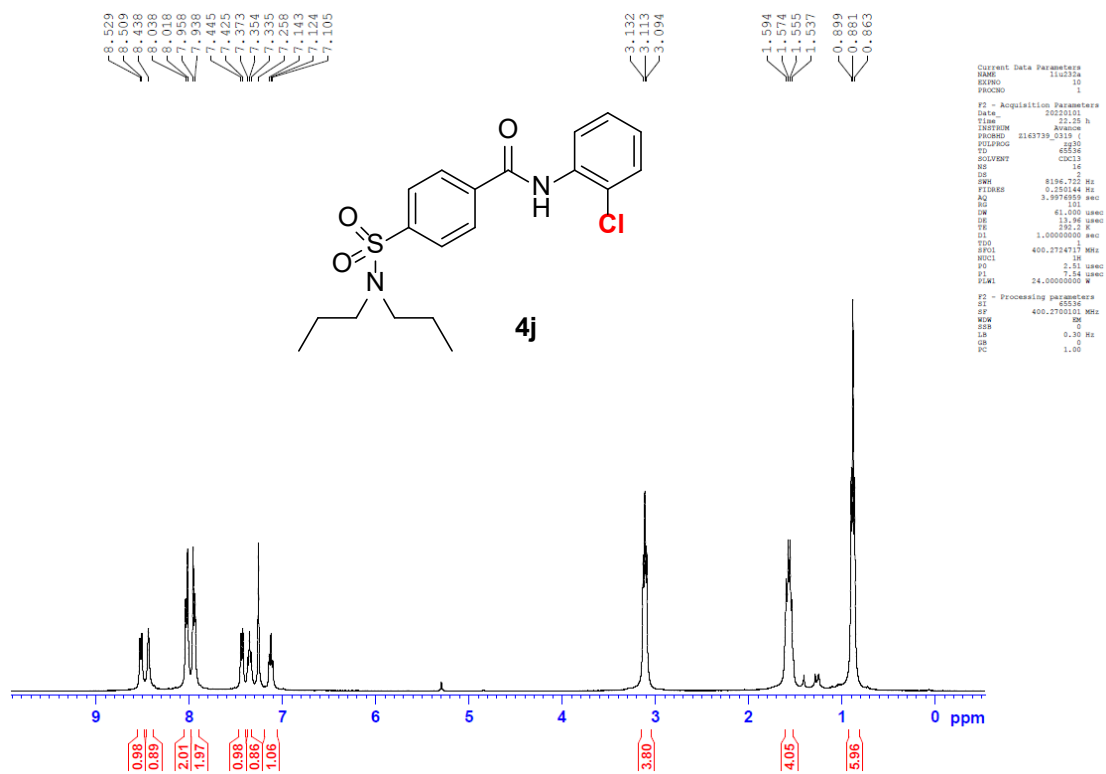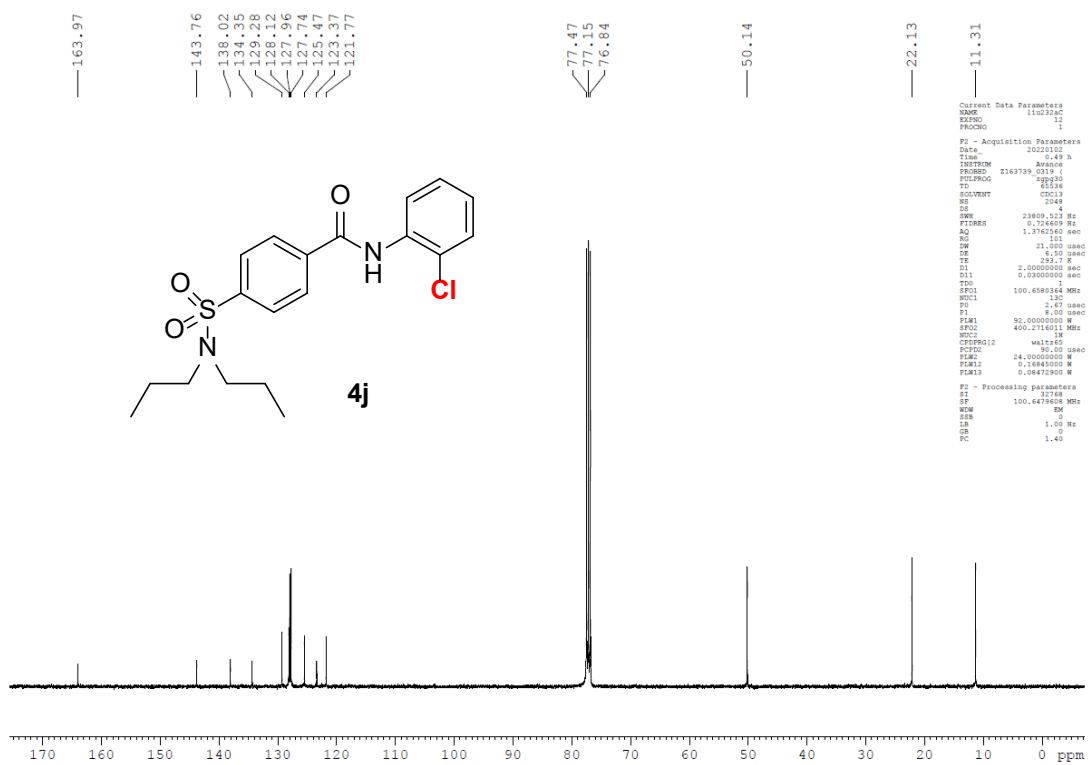

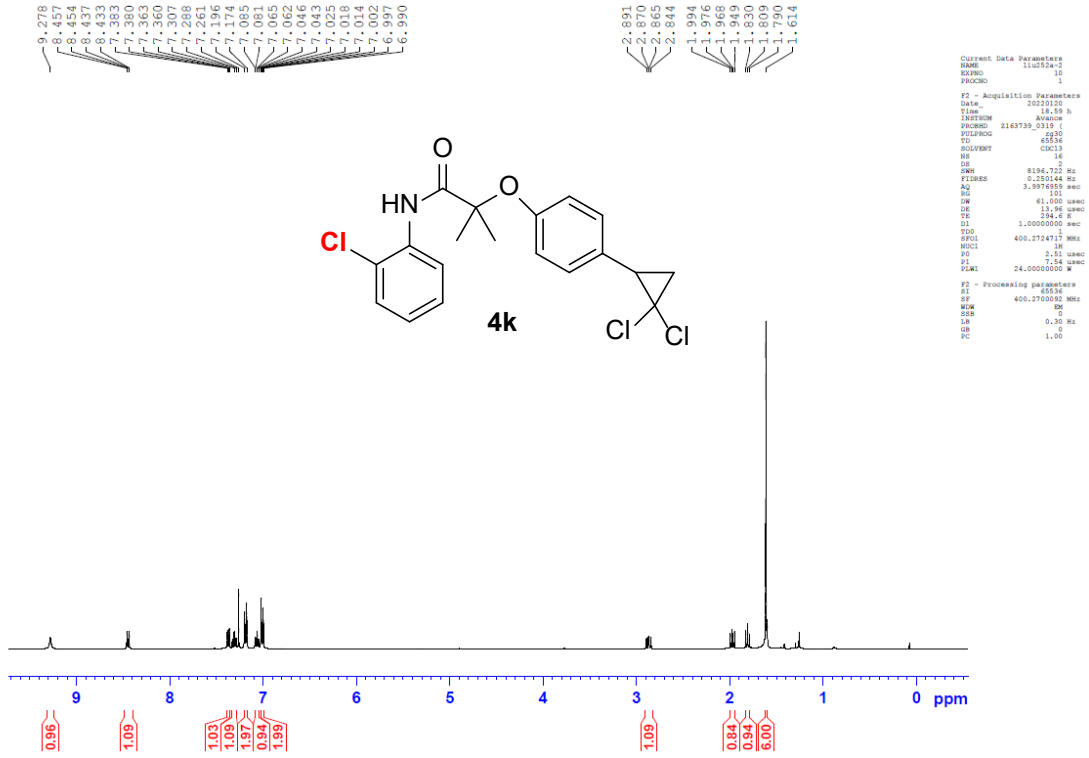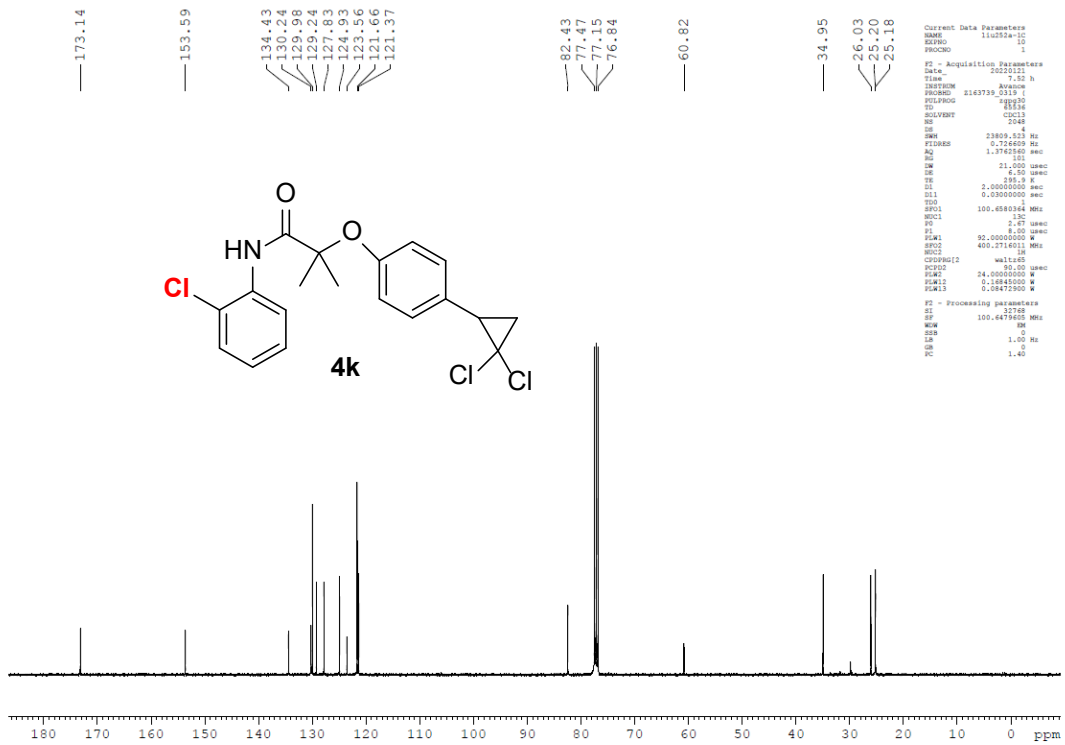

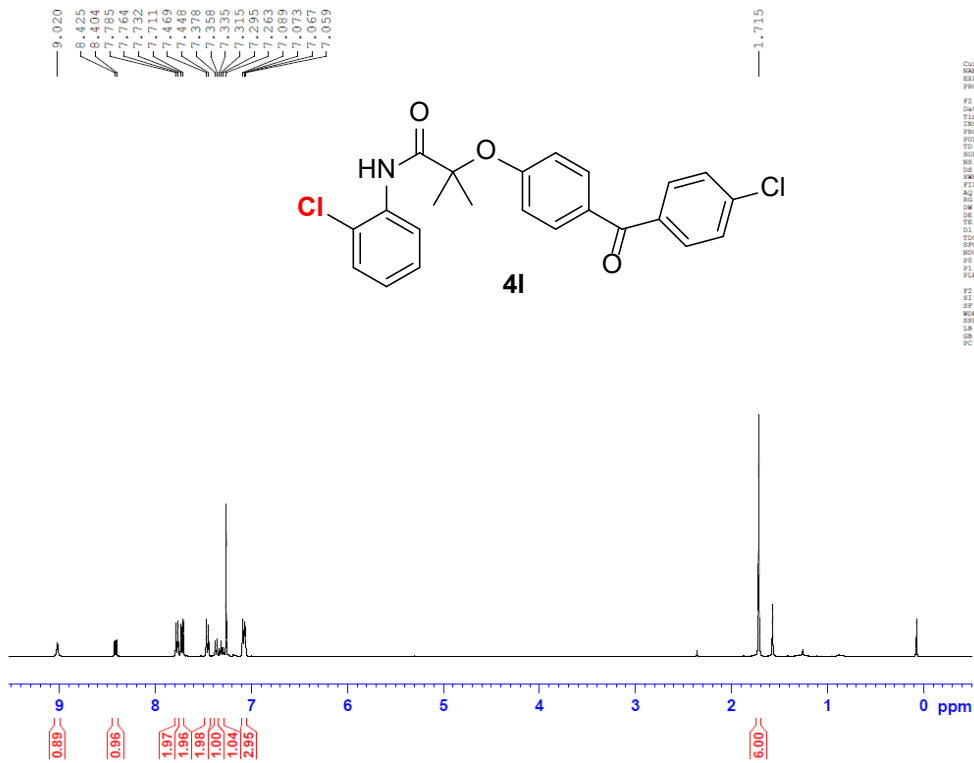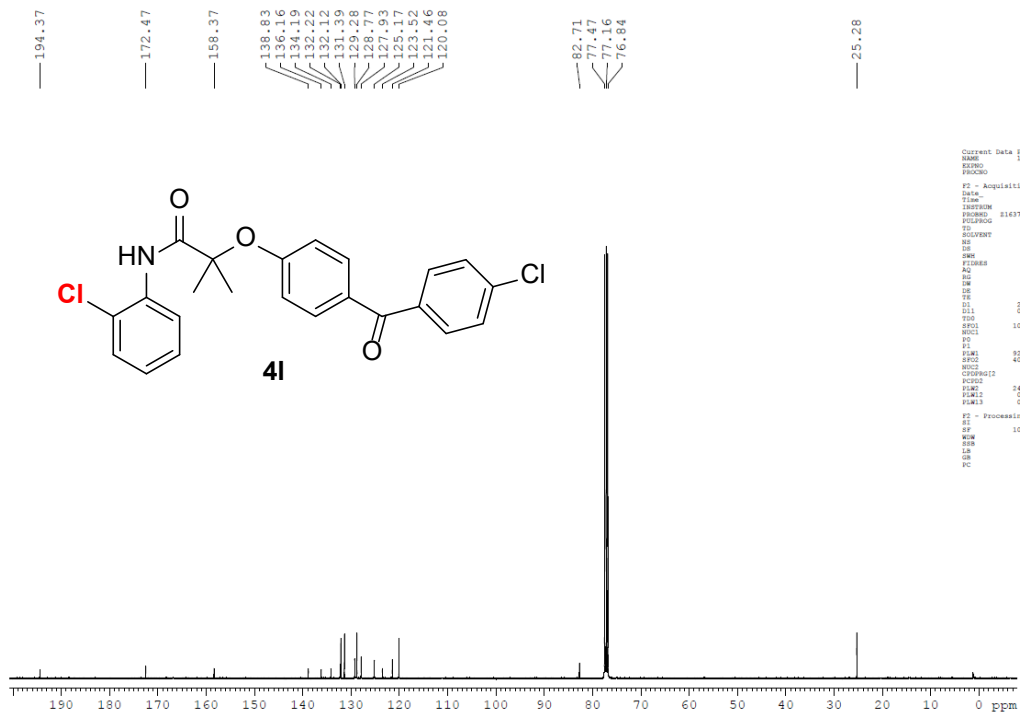

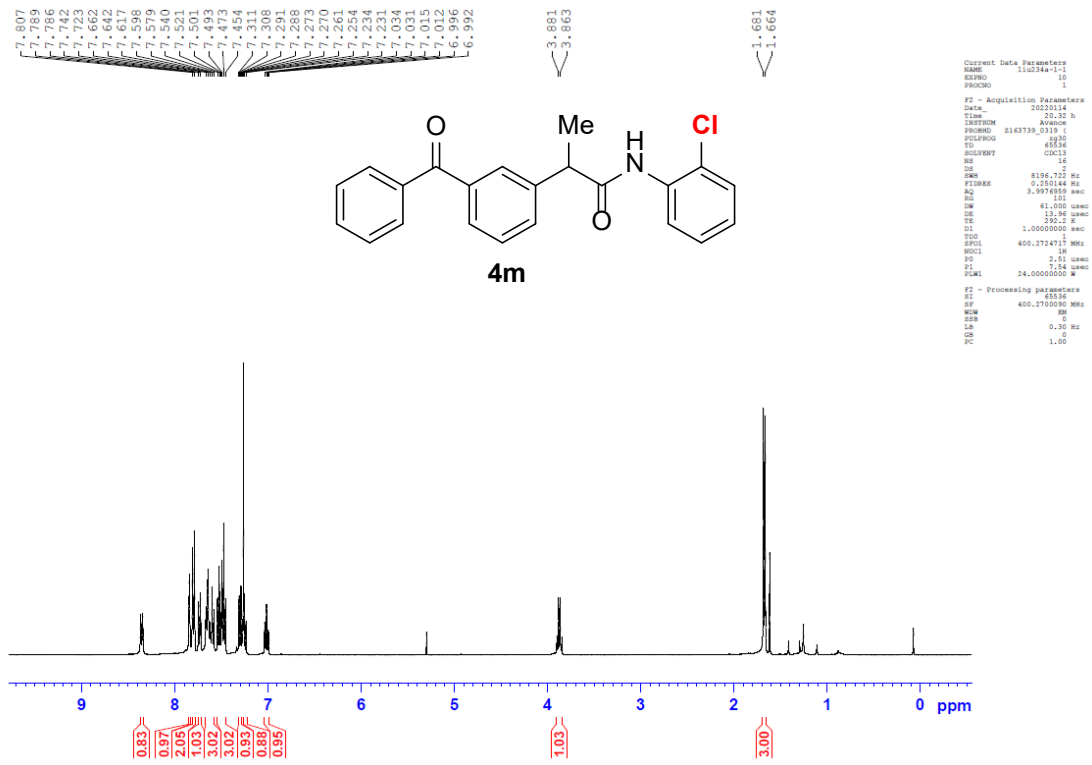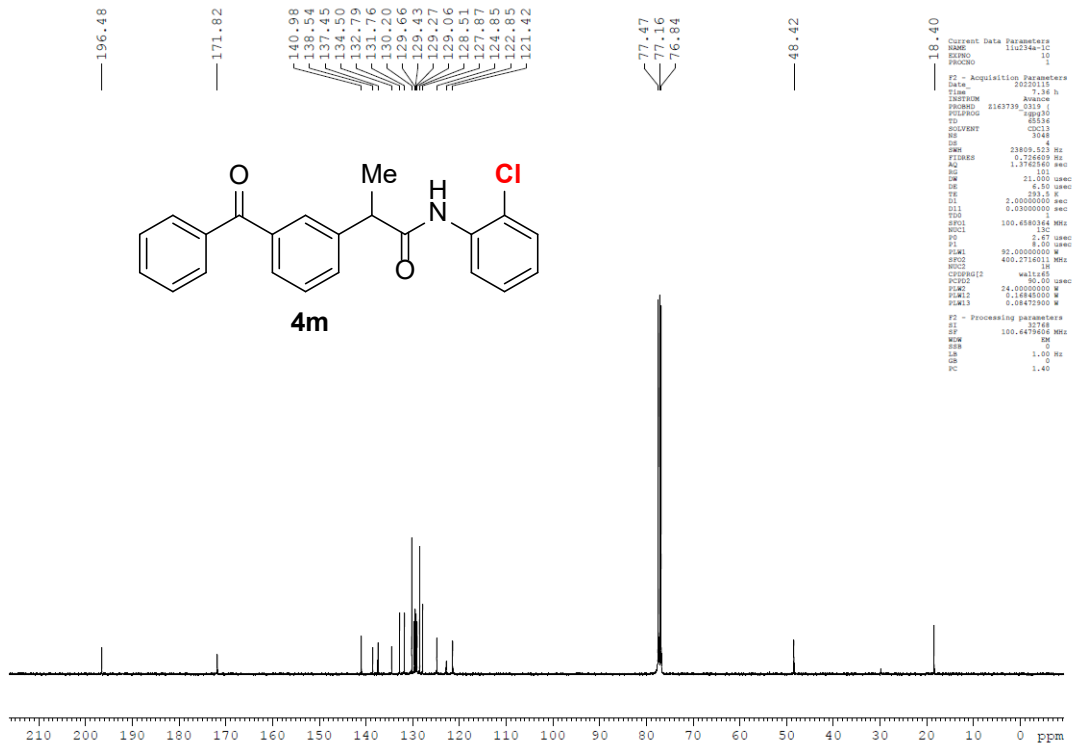



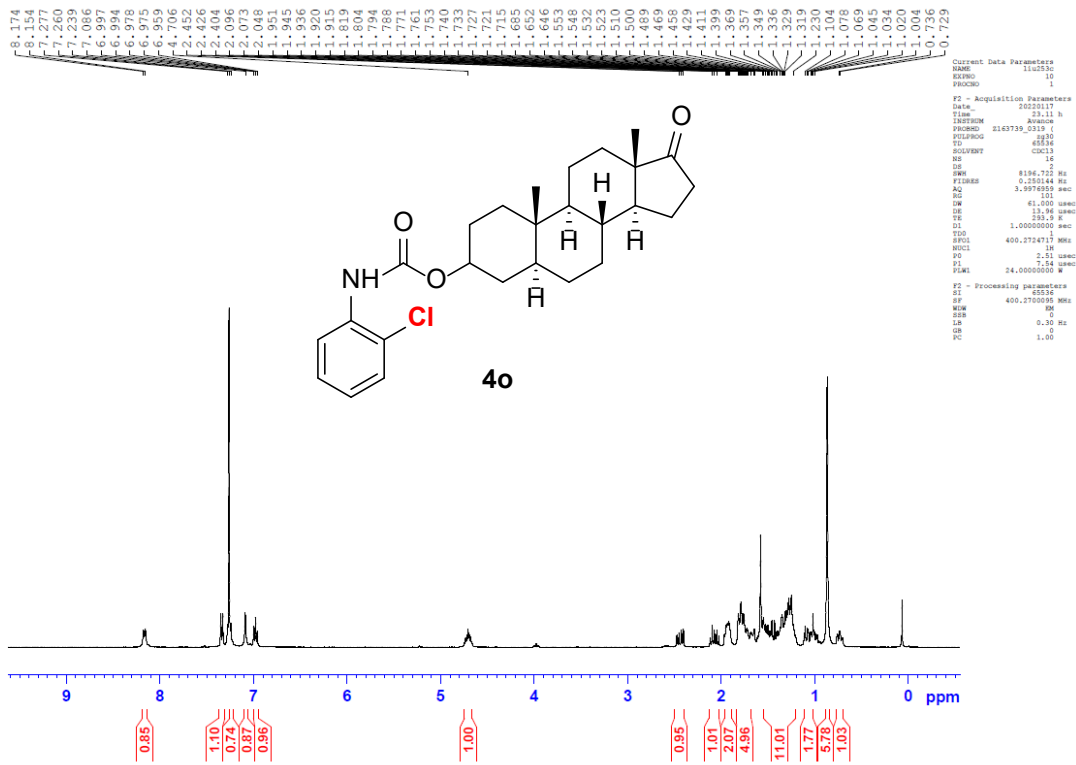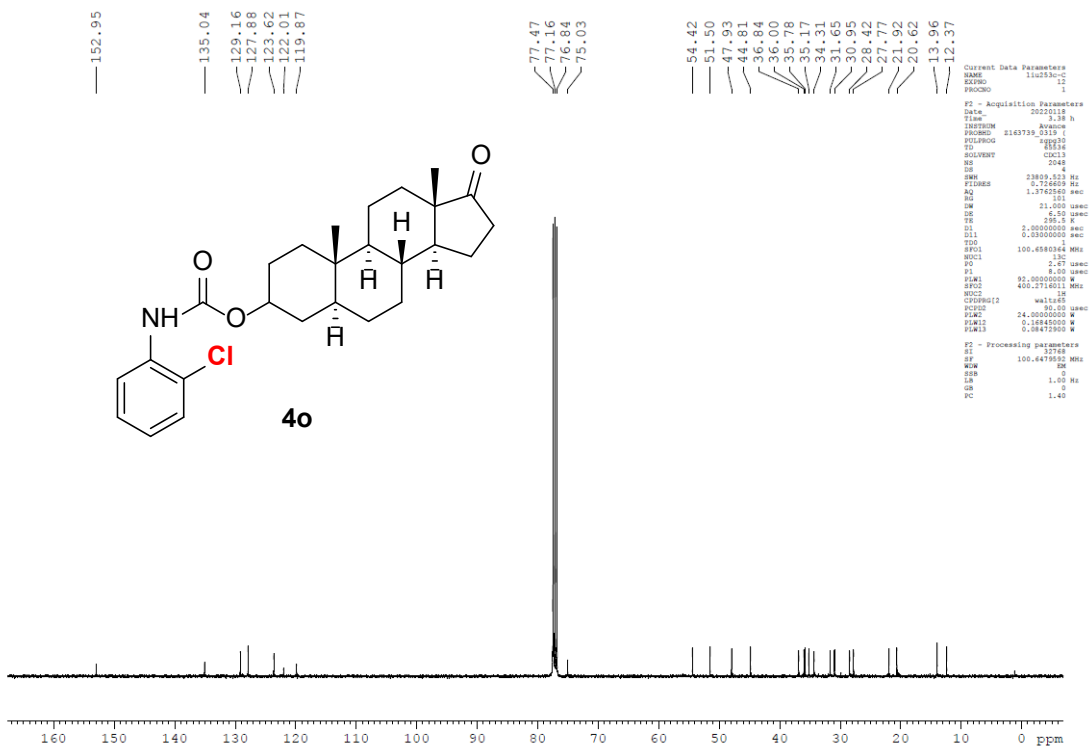

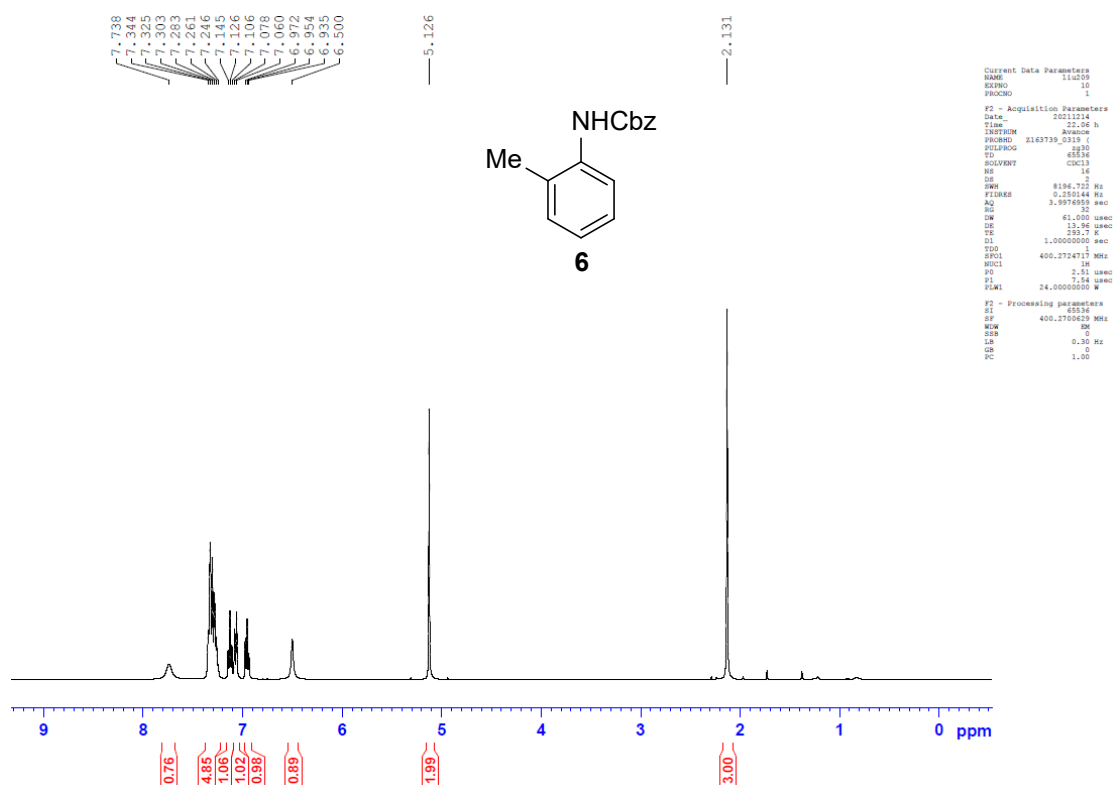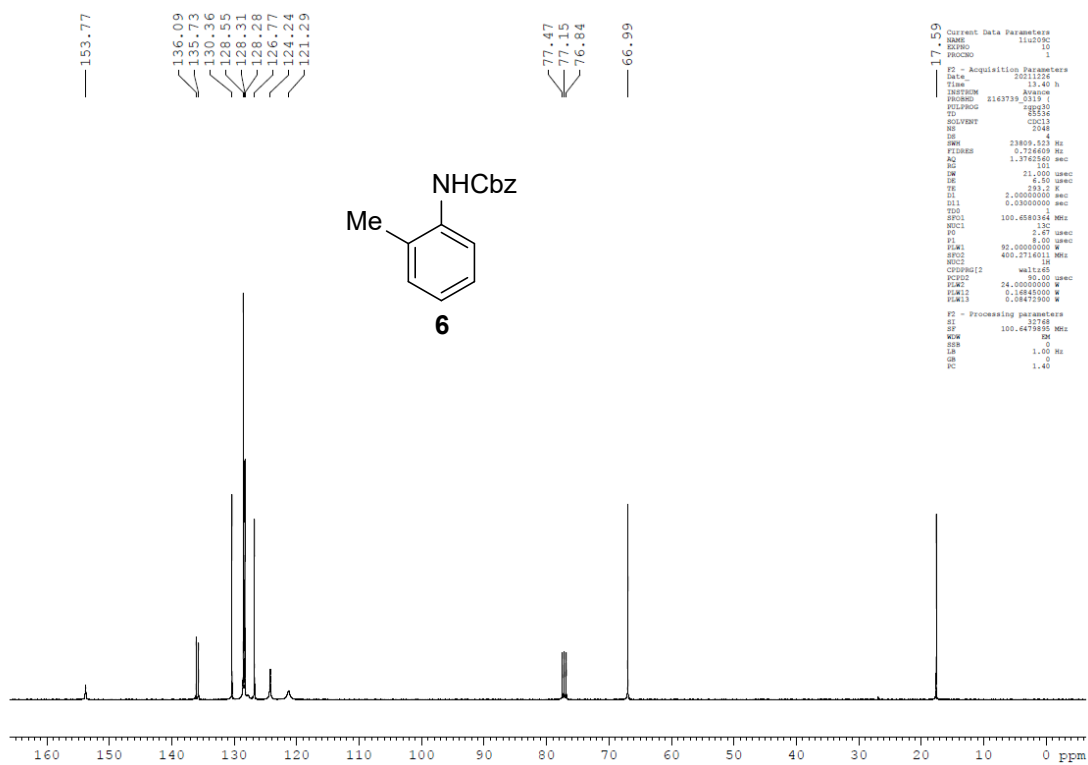

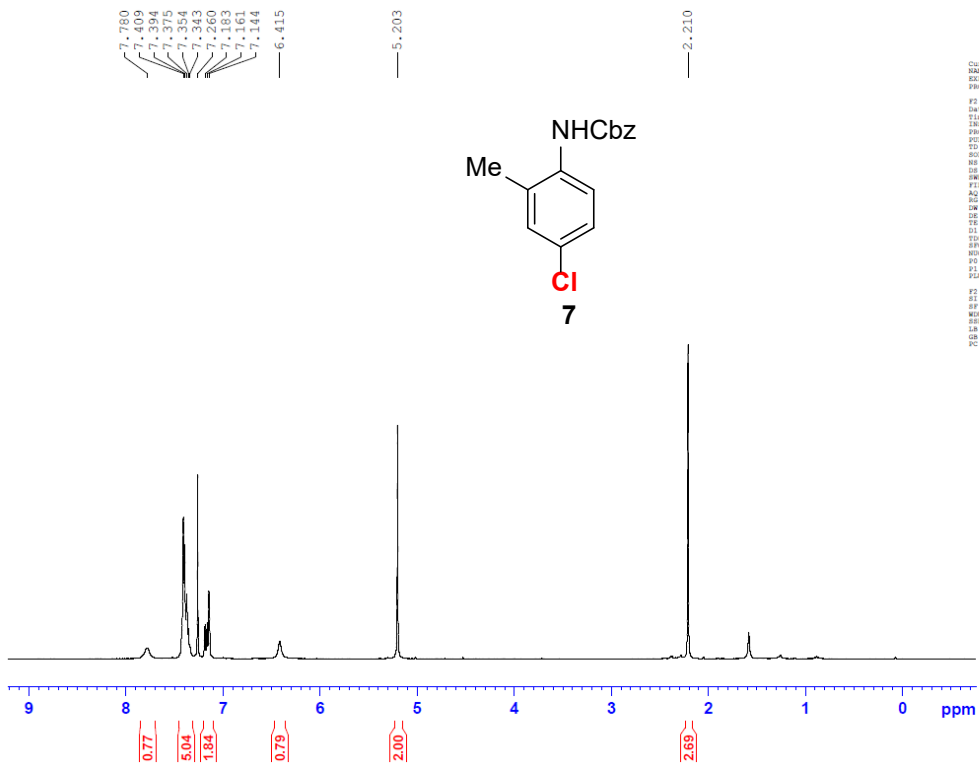

```

Current Data Parameters
NAME: 1101515
EXPNO: 10
PROCNO: 1
F2 - Acquisition Parameters
Date_: 20220111
Time: 10.05 h
INSTRUM: Avance
PROBHD: E163739_0319 (
PULPROG: zgpg30
TD: 65536
SOLVENT: CDCl3
NS: 16
DS: 2
SWH: 8196.732 Hz
F2RES: 0.150144 Hz
AQ: 3.9978555 sec
RG: 101
DQ: 61.000 usec
DE: 12.50 usec
TE: 294.1 K
D1: 1.00000000 sec
TDO: 0
SFO1: 400.274717 MHz
NUC1: 13
PC: 2.51 usec
P1: 1.54 usec
PL1: 24.0000000 W
F2 - Processing parameters
SI: 65536
SF: 400.2700095 MHz
WDW: EM
SSB: 0
LB: 0.30 Hz
GB: 0
PC: 1.00
  
```

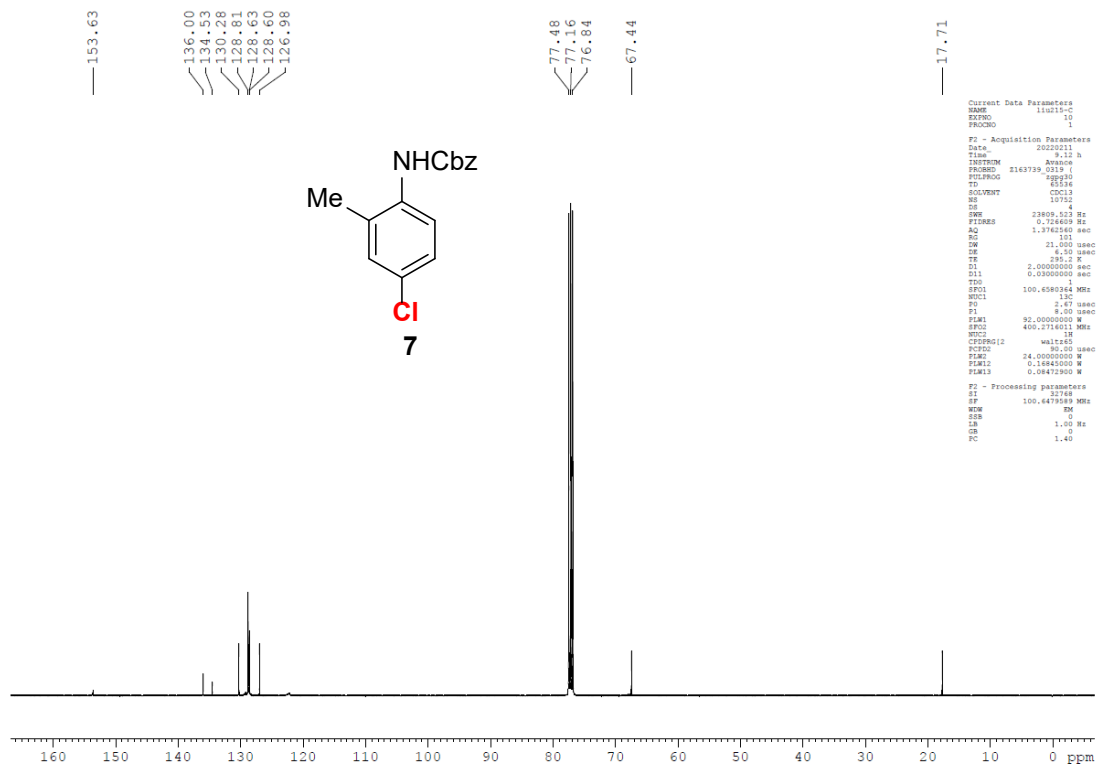

```

Current Data Parameters
NAME: 1101515
EXPNO: 10
PROCNO: 1
F2 - Acquisition Parameters
Date_: 20220111
Time: 9.12 h
INSTRUM: Avance
PROBHD: E163739_0319 (
PULPROG: zgpg30
TD: 65536
SOLVENT: CDCl3
NS: 16
DS: 2
SWH: 23809.523 Hz
F2RES: 0.724609 Hz
AQ: 1.3762160 sec
RG: 101
DQ: 21.000 usec
DE: 61.50 usec
TE: 294.1 K
D1: 2.00000000 sec
D11: 0.03000000 sec
TDO: 0
SFO1: 100.626012 MHz
NUC1: 13
PC: 2.47 usec
P1: 1.00 usec
PL1: 52.0000000 W
SFO2: 400.274717 MHz
NUC2: 1H
CPDPRG2: waltz16
PCPD: 80.000 usec
P2PR: 24.0000000 W
PLM12: 0.16845000 W
PLM13: 0.08422500 W
F2 - Processing parameters
SI: 65536
SF: 100.6473959 MHz
WDW: EM
SSB: 0
LB: 1.00 Hz
GB: 0
PC: 1.40
  
```



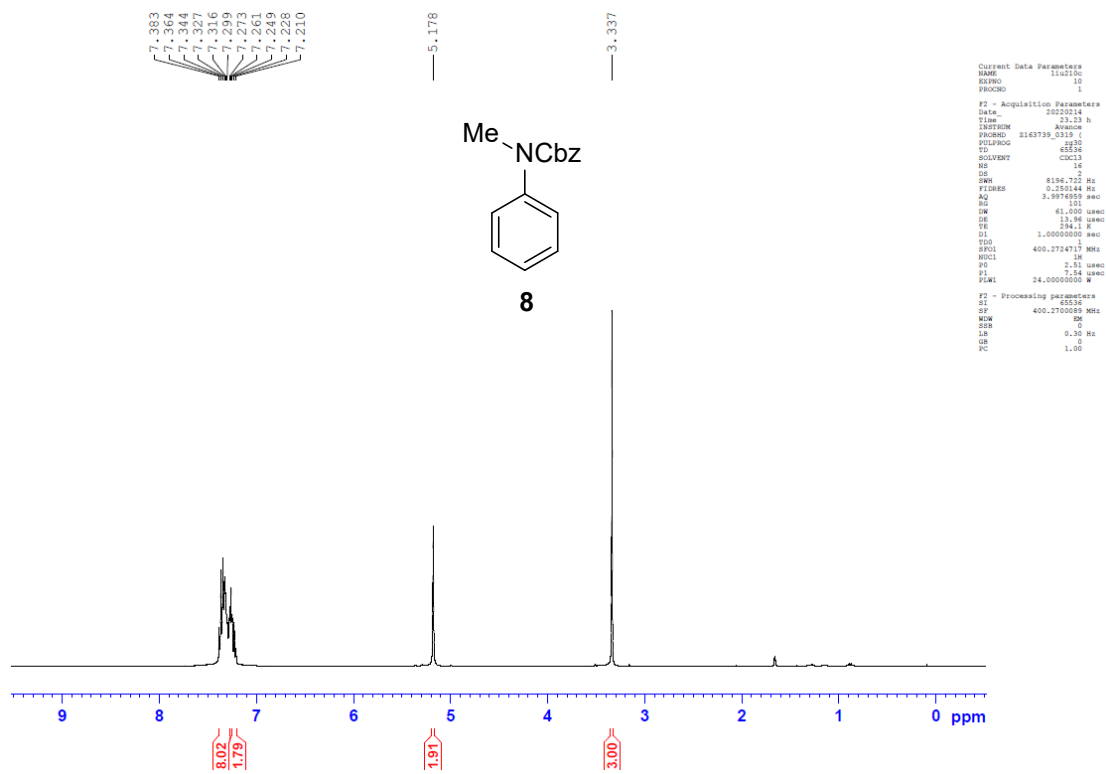

```

Current Data Parameters
NAME      116210c
EXPNO    10
PROCNO   1
F2 - Acquisition Parameters
Date_    20220114
Time     03.23 h
INSTRUM  Avance
PROBHD   1H313 (
PULPROG  zgpg30
TD        65536
SOLVENT  CDCl3
NS        14
DS        2
SWH       8196.722 Hz
FIDRES   0.250144 Hz
AQ        3.997800 sec
RG         101
UW        61.000 usec
DE        131.96 usec
TE        298.1 K
D1        1.0000000 sec
TDO
SFO1     400.274117 MHz
NUC1      1H
PQ        2.51 usec
PI        1.54 usec
PLW1     24.0000000 W
F2 - Processing parameters
SI        65536
SF        400.2700889 MHz
WDW       EM
SSB       0
LB        0.30 Hz
GB        0
PC        1.00
  
```

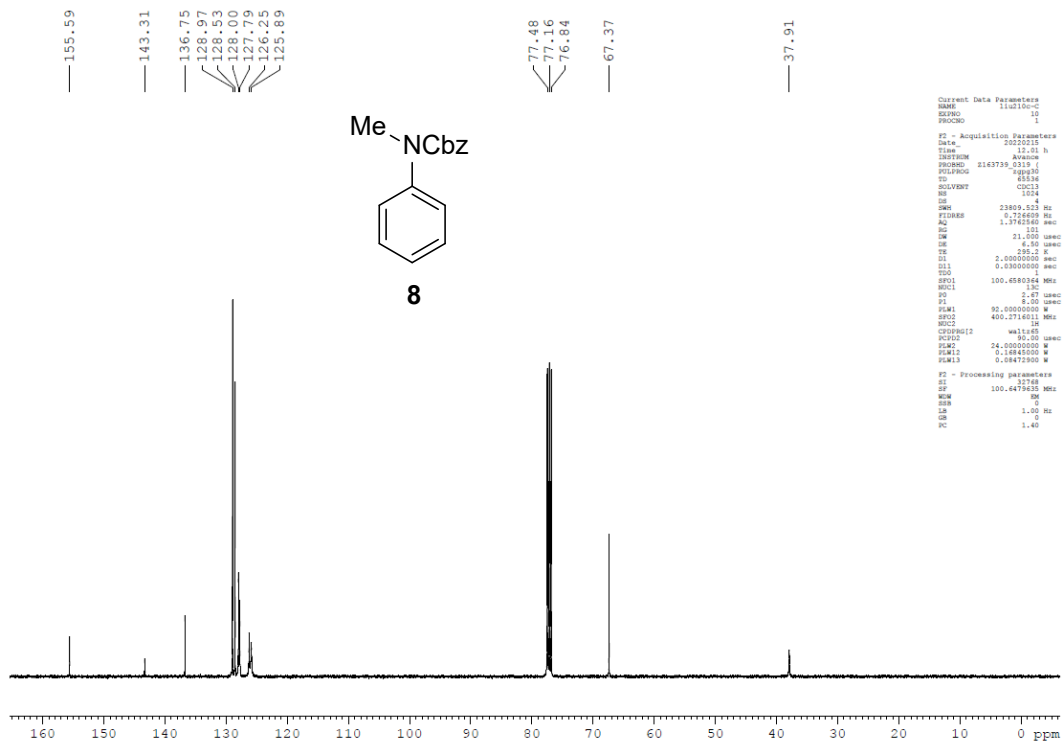

```

Current Data Parameters
NAME      116210c
EXPNO    10
PROCNO   1
F2 - Acquisition Parameters
Date_    20220114
Time     12.01 h
INSTRUM  Avance
PROBHD   1H313 (
PULPROG  zgpg30
TD        65536
SOLVENT  CDCl3
NS        14
DS        2
SWH       23805.617 Hz
FIDRES   0.726609 Hz
AQ        1.376160 sec
RG         101
UW        21.000 usec
DE        6.50 usec
TE        298.2 K
D1        2.0000000 sec
D11       0.0300000 sec
TDO
SFO1     100.628034 MHz
NUC1      13C
PQ        2.87 usec
PI        1.00 usec
PLW1     92.0000000 W
PLW2     400.274117 MHz
PLW3     10.0000000 W
PLW4     24.0000000 W
PLW5     0.10484000 W
PLW6     0.08472000 W
F2 - Processing parameters
SI        65536
SF        100.6478635 MHz
WDW       EM
SSB       0
LB        1.00 Hz
GB        0
PC        1.40
  
```

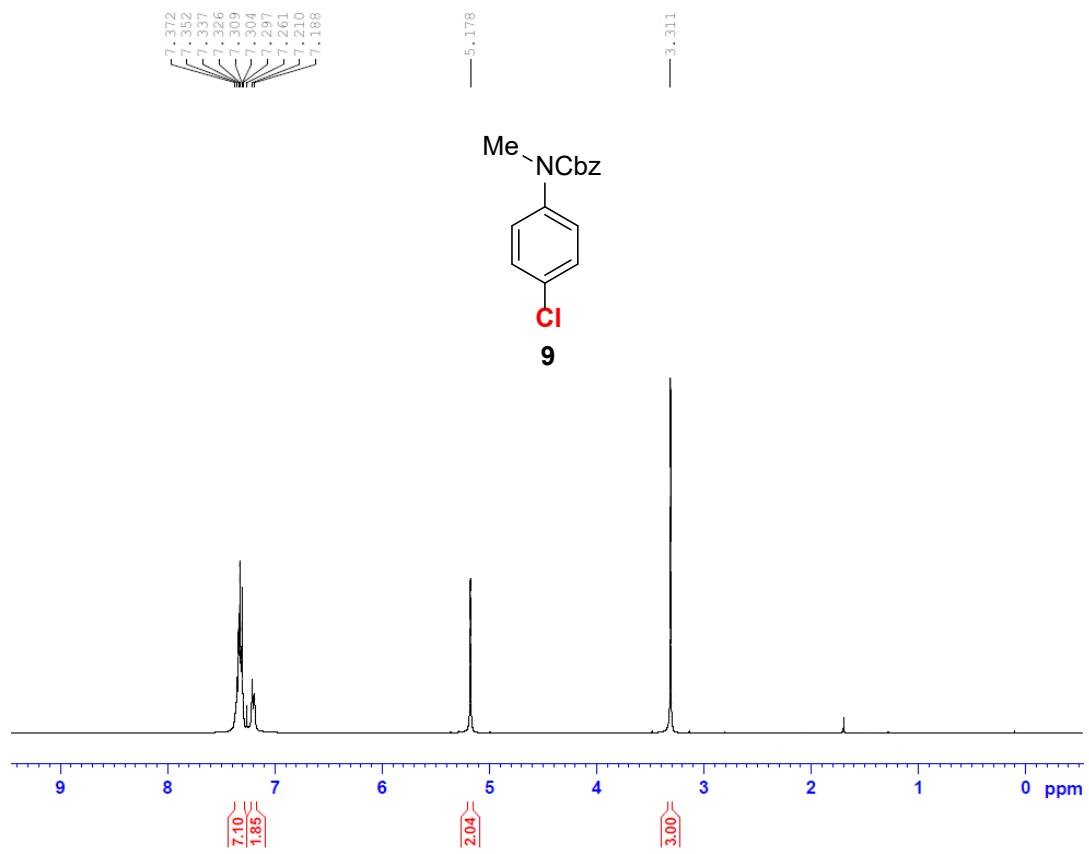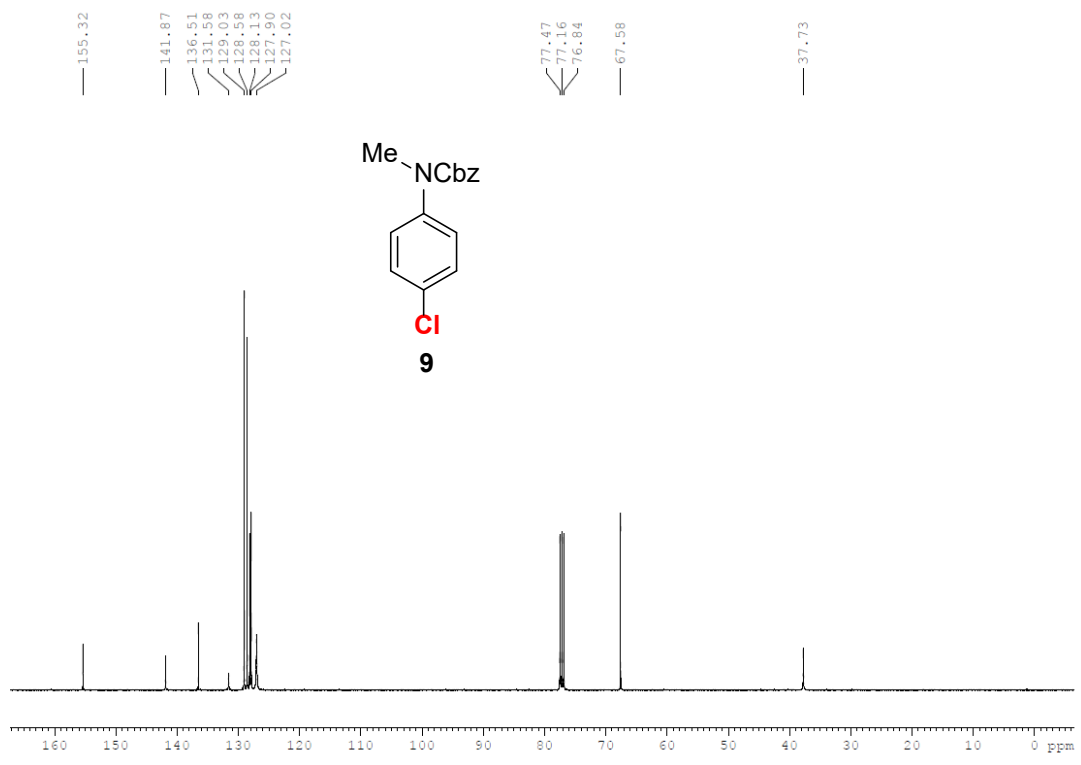

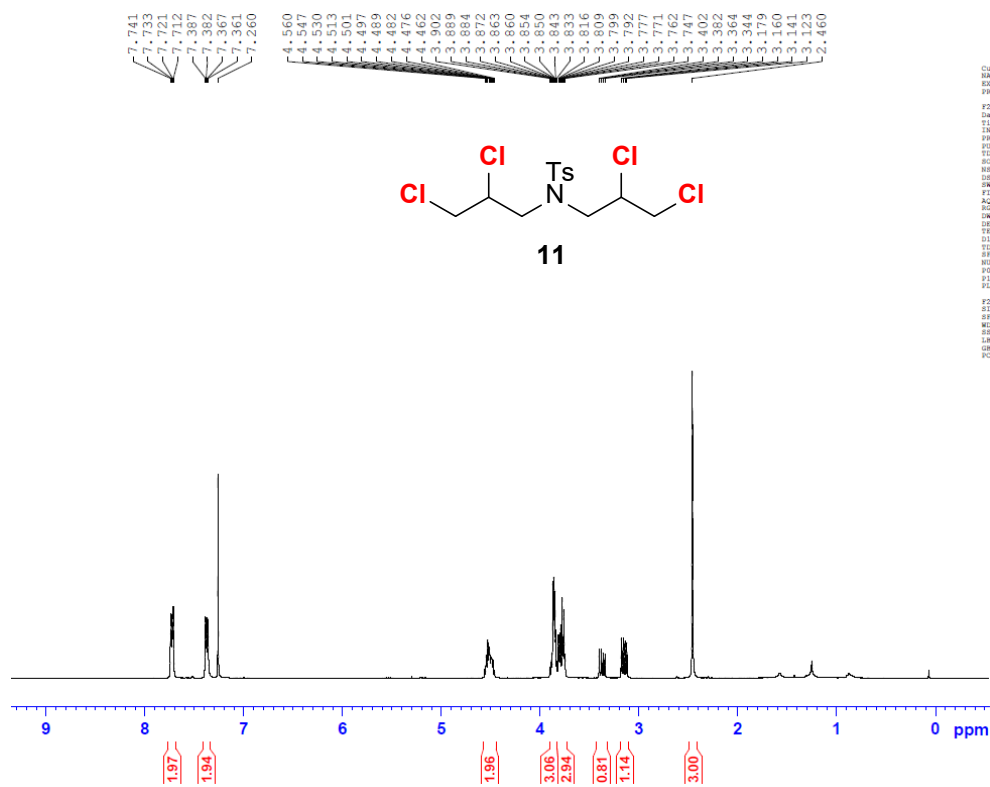

```

Current Data Parameters
NAME      11u218-7
EXPNO    10
PROCNO   1
F2 - Acquisition Parameters
Date_    20110227
Time     15.03 h
INSTRUM  Avance
PROBHD   z163739_0319 (
PULPROG  zg30
TD        65536
SOLVENT  CDCl3
NS        16
DS        8196.712 Hz
FIDRES   0.259144 Hz
AQ        3.8974055 sec
RG        101
AW        61.000 usec
DE        13.98 usec
TE        301.6 K
D1        1.00000000 sec
TDO
SFO1     400.2724717 MHz
NUC1      1H
PQ        2.51 usec
PI        7.54 usec
PWL1     24.00000000 W
F2 - Processing parameters
SI        65536
SF        400.2700000 MHz
WDW       EM
SSB       0
LB        0.30 Hz
GB
PC        1.00
  
```

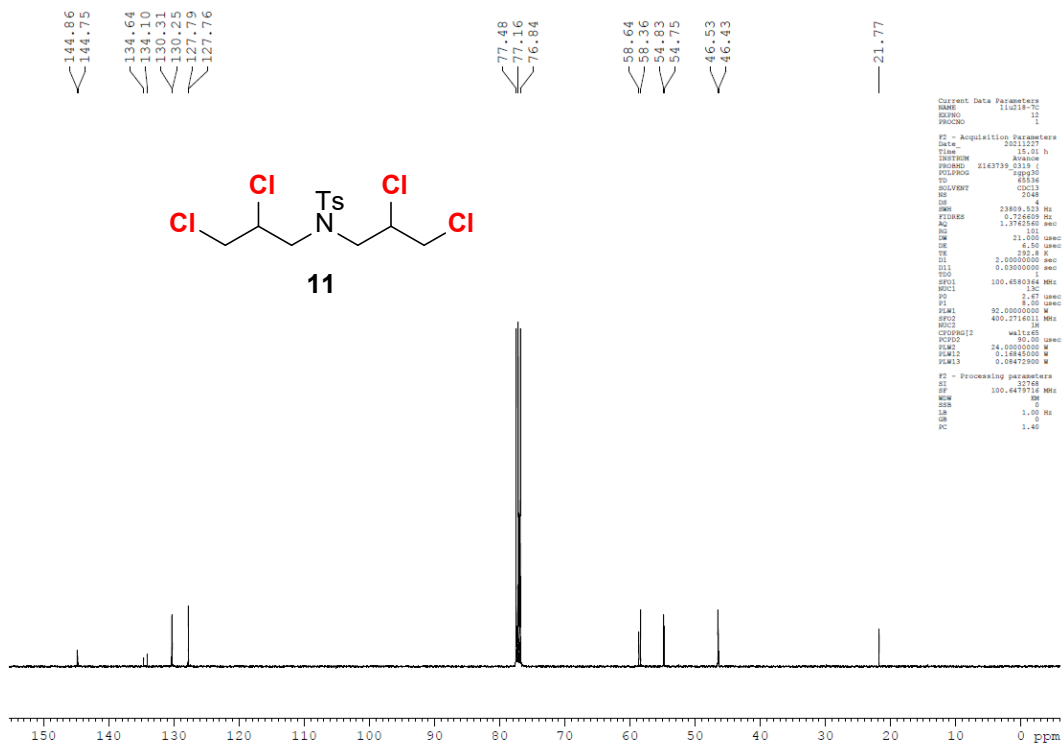

```

Current Data Parameters
NAME      11u218-7
EXPNO    11
PROCNO   1
F2 - Acquisition Parameters
Date_    20110227
Time     15.01 h
INSTRUM  Avance
PROBHD   z163739_0319 (
PULPROG  zg30
TD        65536
SOLVENT  CDCl3
NS        16
DS        23809.443 Hz
FIDRES   0.722609 Hz
AQ        1.9762160 sec
RG        11.001
AW        21.001 usec
DE        6.50 usec
TE        302.8 K
D1        2.00000000 sec
TDO
SFO1     100.6280264 MHz
NUC1      13C
PQ        2.67 usec
PI        8.50 usec
PWL1     90.00000000 W
SFO2     400.2716011 MHz
NUC2      1H
PULPROG2  waltz16
TD        65536
SFO3     24.00000000 MHz
PWL2     0.10846000 W
SFO4     0.08472000 MHz
PWL3     0.08472000 W
F2 - Processing parameters
SI        32768
SF        100.6479716 MHz
WDW       EM
SSB       0
LB        1.00 Hz
GB
PC        1.40
  
```

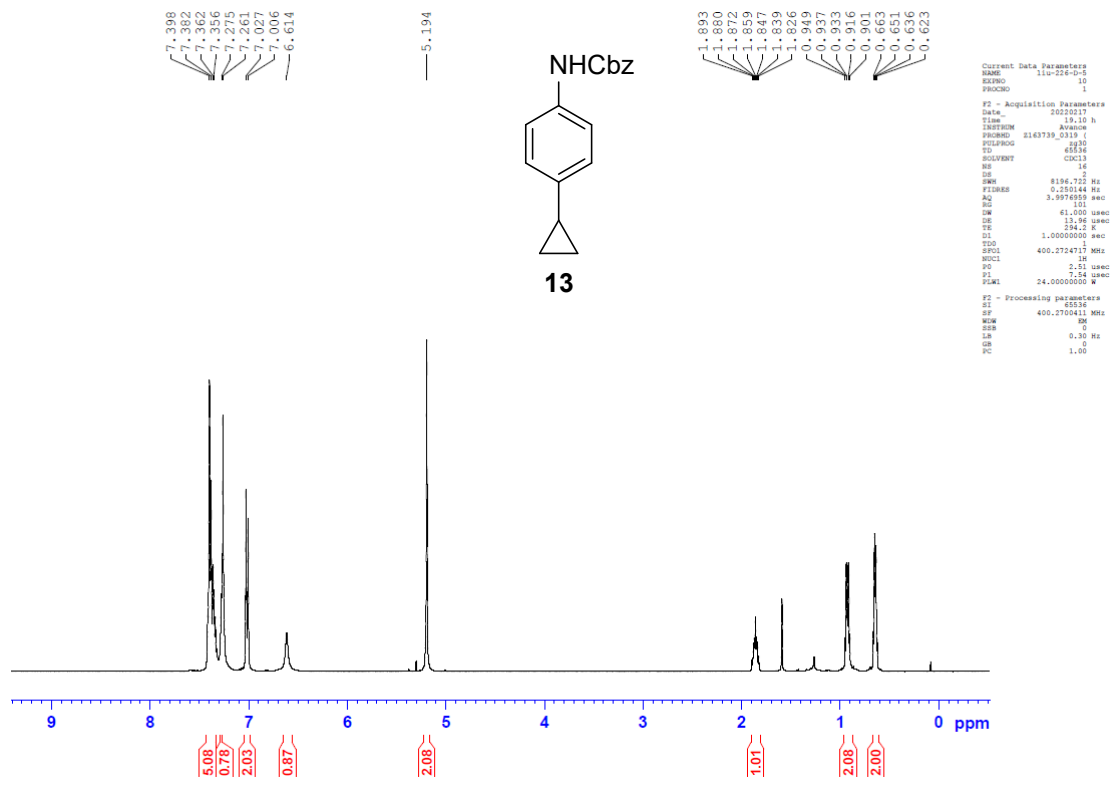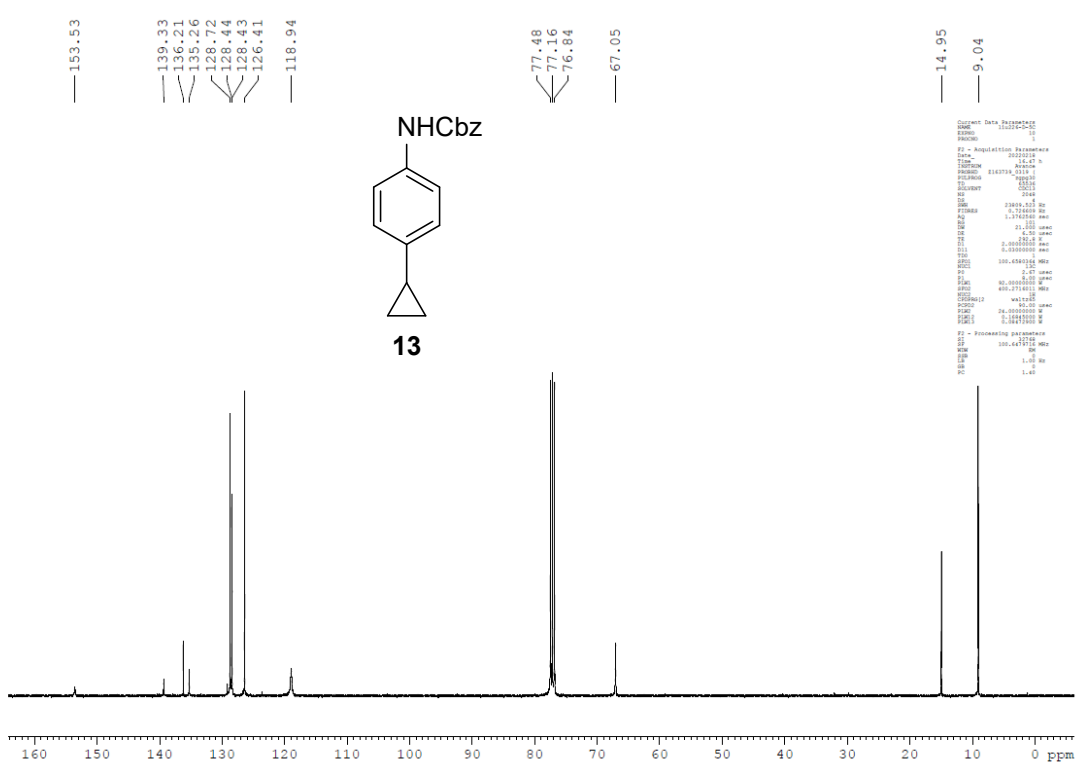

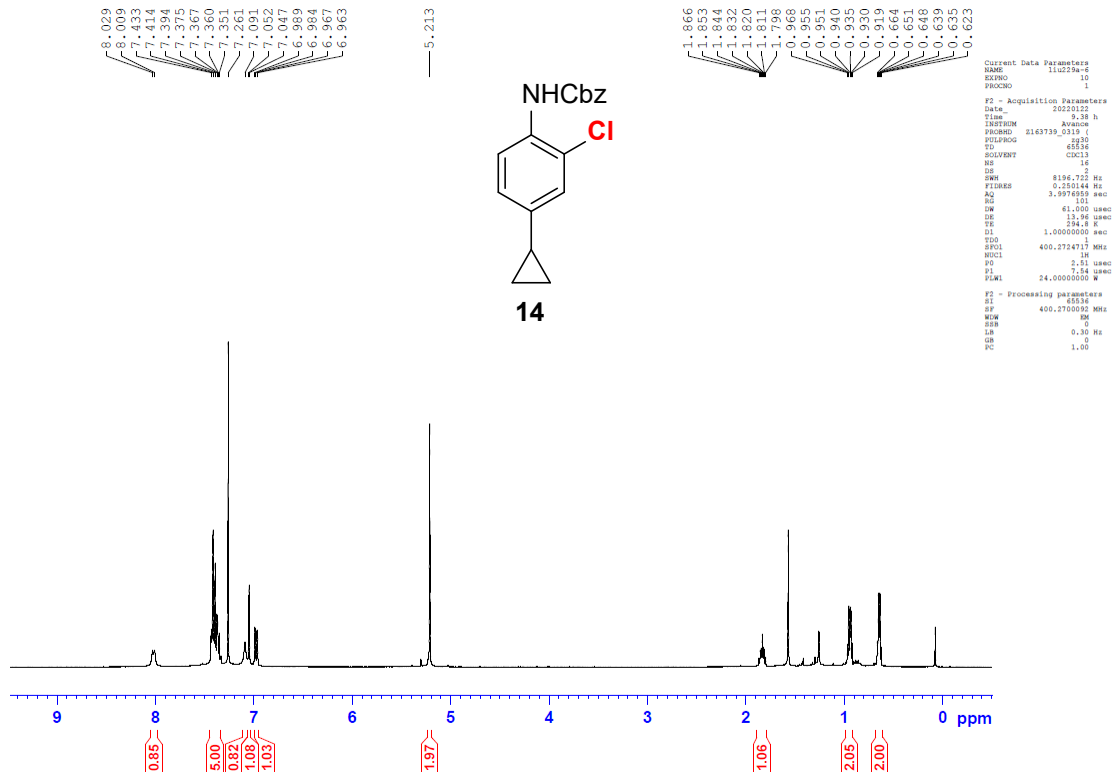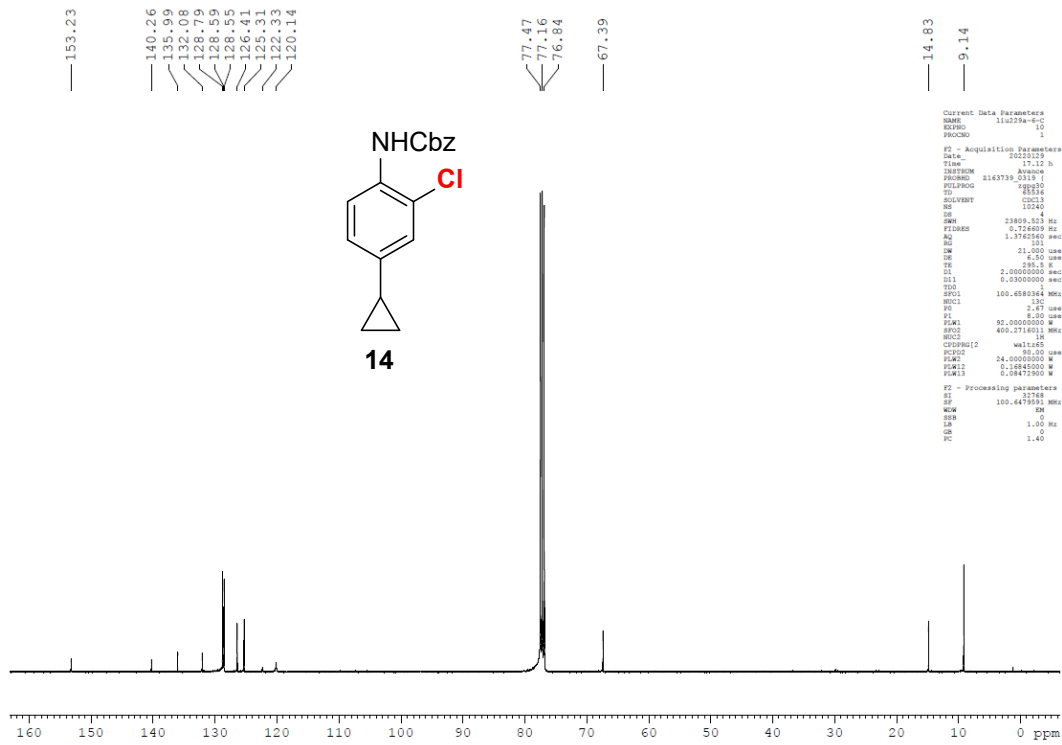

Supplement: d2cc05320a1.pdf [file d2cc05320a1.pdf]
